# Supplementary material for: 1,5-Hydrogen Atom Transfer/Surzur–Tanner Rearrangement: A Radical Cascade Approach for the Synthesis of 1,6-Dioxaspiro[4.5]decane and 6,8-Dioxabicyclo[3.2.1]octane Scaffolds in Carbohydrate Systems
Source: PubMed Central journal article supplement (PMC8576821; doi:10.1021/acs.joc.1c01376), 2021-09-23
Supplement: jo1c01376_si_001.pdf [file jo1c01376_si_001.pdf]

## Supporting Information

### **1,5-Hydrogen Atom Transfer–Surzur-Tanner-rearrangement: A Radical Cascade Approach for the Synthesis of 1,6-Dioxaspiro[4.5]decane and 6,8-Dioxabicyclo[3.2.1]octane Scaffolds in Carbohydrate Systems**

Elisa I. León,<sup>a</sup> Ángeles Martín,<sup>a</sup> Adrián S. Montes,<sup>a,b</sup> Inés Pérez-Martín,<sup>\*,a</sup> María del Sol Rodríguez,<sup>a</sup> Ernesto Suárez<sup>\*,a</sup>

<sup>a</sup> Síntesis de Productos Naturales, Instituto de Productos Naturales y Agrobiología del CSIC, Avda. Astrofísico Francisco Sánchez 3, 38206, La Laguna, Tenerife, Spain

<sup>b</sup> Doctoral and Postgraduate School, Universidad de La Laguna, Avda. Astrofísico Francisco Sánchez s/n, 38200 La Laguna, Tenerife, Spain

## Table of Contents:

|                                                                                                                                                                                                                          |          |
|--------------------------------------------------------------------------------------------------------------------------------------------------------------------------------------------------------------------------|----------|
| 1. Table S1. Comparison between Experimental and Calculated Ring Coupling Constant of 3- <i>C</i> -(Glycopyranosyl)1-propoxyphthalimides. ....                                                                           | S3       |
| 2. Table S2. Comparison between Experimental and Calculated Ring Coupling Constant of <i>C</i> -(Glycopyranosyl) <i>N</i> -methoxyphthalimides. ....                                                                     | S4       |
| 3. Table S3. Comparison between Experimental and Calculated Ring Coupling Constant of 10-Deoxy-1,6-dioxaspiro[4.5]decane Compounds. ....                                                                                 | S5       |
| 4. Table S4. Comparison between Experimental and Calculated Long-range $^4J_w$ Coupling Constants. ....                                                                                                                  | S5       |
| 5. Table S5. Selected signals of $^1\text{H}$ NMR spectra of labelled [PhCH- $^2\text{H}$ ] <b>31</b> and [PhCH- $^2\text{H}$ ] <b>97</b> . ....                                                                         | S6       |
| 6. Table S6. Selected signals of $^{13}\text{C}\{\text{H}\}$ NMR spectra of labelled [PhCH- $^2\text{H}$ ] <b>31</b> and [PhCH- $^2\text{H}$ ] <b>97</b> . ....                                                          | S6       |
| 7. Figure S1. $^1\text{H}$ NMR spectrum of [PhCH- $^2\text{H}$ ] <b>31</b> . ....                                                                                                                                        | S7       |
| 8. Figure S2. $^1\text{H}$ NMR spectrum of [PhCH- $^2\text{H}$ ] <b>97</b> . ....                                                                                                                                        | S7       |
| 9. Figure S3. $^{13}\text{C}\{\text{H}\}$ NMR spectrum of [PhCH- $^2\text{H}$ ] <b>31</b> . ....                                                                                                                         | S8       |
| 10. Figure S4. $^{13}\text{C}\{\text{H}\}$ NMR spectrum of [PhCH- $^2\text{H}$ ] <b>97</b> . ....                                                                                                                        | S8       |
| 11. Table S7. Comparison between Experimental and Calculated Ring Coupling Constant of 4-Deoxy-6,8-dioxabicyclo[3.2.1]octane Compounds. ....                                                                             | S9       |
| 12. Table S8. Comparison between Experimental and Calculated Ring Coupling Constant of 3- <i>C</i> -( $\alpha$ -D-ribofuranosyl)1-propoxyphthalimides. ....                                                              | S9       |
| 13. Table S9. Reactivity Differences between LGs in the 1,5-Hydrogen Atom Transfer–Surzur-Tanner Rearrangement Sequence for the Synthesis of 1,6-Dioxaspiro[4.5]decane and 6,8-Dioxabicyclo[3.2.1]octane Scaffolds. .... | S10      |
| 14. Figures S5–S94. $^1\text{H}$ and $^{13}\text{C}\{\text{H}\}$ NMR spectra of all new compounds. ....                                                                                                                  | S11–S100 |

**Table S1.** Comparison between Experimental and Calculated Ring Coupling Constant of 3-C-(Glycopyranosyl)1-propoxyphthalimides.<sup>a</sup>

| Compound  | Conformation <sup>b</sup>                                       | <sup>3</sup> J <sub>1,2</sub> [Hz] | <sup>3</sup> J <sub>2,3</sub> [Hz] | <sup>3</sup> J <sub>3,4</sub> [Hz] | <sup>3</sup> J <sub>4,5</sub> [Hz] |
|-----------|-----------------------------------------------------------------|------------------------------------|------------------------------------|------------------------------------|------------------------------------|
| <b>1</b>  | <sup>4</sup> C <sub>1</sub> ( <sup>3</sup> J <sub>calc.</sub> ) | 6.4                                | 9.2                                | 9.5                                | 9.2                                |
|           | <sup>1</sup> C <sub>4</sub> ( <sup>3</sup> J <sub>calc.</sub> ) | 0.9                                | 2.5                                | 2.8                                | 1.2                                |
|           | <sup>3</sup> J <sub>exp.</sub> <sup>c</sup>                     | 5.5                                | 9.0                                | 7.8                                | n.o.                               |
| <b>2</b>  | <sup>4</sup> C <sub>1</sub> ( <sup>3</sup> J <sub>calc.</sub> ) | 5.8                                | 9.0                                | 8.7                                | 9.2                                |
|           | <sup>1</sup> C <sub>4</sub> ( <sup>3</sup> J <sub>calc.</sub> ) | 1.2                                | 2.6                                | 3.6                                | 1.6                                |
|           | <sup>3</sup> J <sub>exp.</sub>                                  | 5.5                                | 9.4                                | 5.7                                | n.o.                               |
| <b>3</b>  | <sup>4</sup> C <sub>1</sub> ( <sup>3</sup> J <sub>calc.</sub> ) | 8.8                                | 9.3                                | 9.0                                | 9.2                                |
|           | <sup>1</sup> C <sub>4</sub> ( <sup>3</sup> J <sub>calc.</sub> ) | 0.8                                | 2.4                                | 3.4                                | 1.4                                |
|           | <sup>3</sup> J <sub>exp.</sub>                                  | 9.5                                | 9.5                                | n.o.                               | 8.0                                |
| <b>4</b>  | <sup>4</sup> C <sub>1</sub> ( <sup>3</sup> J <sub>calc.</sub> ) | 8.7                                | 8.9                                | 9.1                                | 9.2                                |
|           | <sup>1</sup> C <sub>4</sub> ( <sup>3</sup> J <sub>calc.</sub> ) | 0.9                                | 2.9                                | 3.8                                | 1.5                                |
|           | <sup>3</sup> J <sub>exp.</sub>                                  | 9.5                                | 8.9                                | 9.3                                | 9.5                                |
| <b>5</b>  | <sup>4</sup> C <sub>1</sub> ( <sup>3</sup> J <sub>calc.</sub> ) | 0.8                                | 2.9                                | 9.6                                | 9.2                                |
|           | <sup>1</sup> C <sub>4</sub> ( <sup>3</sup> J <sub>calc.</sub> ) | 8.8                                | 2.5                                | 3.3                                | 1.4                                |
|           | <sup>3</sup> J <sub>exp.</sub>                                  | 2.6                                | 3.4                                | 8.7                                | 8.4                                |
| <b>6</b>  | <sup>4</sup> C <sub>1</sub> ( <sup>3</sup> J <sub>calc.</sub> ) | 1.0                                | 2.3                                | 9.1                                | 9.2                                |
|           | <sup>1</sup> C <sub>4</sub> ( <sup>3</sup> J <sub>calc.</sub> ) | 8.7                                | 2.6                                | 3.3                                | 1.5                                |
|           | <sup>3</sup> J <sub>exp.</sub>                                  | 2.9                                | 2.9                                | n.o.                               | n.o.                               |
| <b>7</b>  | <sup>4</sup> C <sub>1</sub> ( <sup>3</sup> J <sub>calc.</sub> ) | 0.4                                | 2.6                                | 9.5                                | 9.2                                |
|           | <sup>1</sup> C <sub>4</sub> ( <sup>3</sup> J <sub>calc.</sub> ) | 6.1                                | 3.0                                | 3.4                                | 1.3                                |
|           | <sup>3</sup> J <sub>exp.</sub>                                  | 1.0                                | 3.3                                | 9.3                                | 9.8                                |
| <b>8</b>  | <sup>4</sup> C <sub>1</sub> ( <sup>3</sup> J <sub>calc.</sub> ) | 0.1                                | 2.2                                | 9.1                                | 9.1                                |
|           | <sup>1</sup> C <sub>4</sub> ( <sup>3</sup> J <sub>calc.</sub> ) | 6.2                                | 2.7                                | 3.8                                | 1.5                                |
|           | <sup>3</sup> J <sub>exp.</sub>                                  | < 1                                | 1.9                                | n.o.                               | n.o.                               |
| <b>9</b>  | <sup>4</sup> C <sub>1</sub> ( <sup>3</sup> J <sub>calc.</sub> ) | 0.3                                | 3.0                                | 2.6                                | 5.3                                |
|           | <sup>1</sup> C <sub>4</sub> ( <sup>3</sup> J <sub>calc.</sub> ) | 5.4                                | 9.0                                | 2.7                                | 0.5                                |
|           | <sup>3</sup> J <sub>exp.</sub>                                  | 3.0                                | 5.9                                | 3.2                                | 4.5                                |
| <b>10</b> | <sup>4</sup> C <sub>1</sub> ( <sup>3</sup> J <sub>calc.</sub> ) | 0.5                                | 2.4                                | 2.6                                | 5.2                                |
|           | <sup>1</sup> C <sub>4</sub> ( <sup>3</sup> J <sub>calc.</sub> ) | 5.0                                | 9.4                                | 2.8                                | 0.4                                |
|           | <sup>3</sup> J <sub>exp.</sub>                                  | 3.3                                | 6.3                                | 3.1                                | 4.1                                |
| <b>11</b> | <sup>4</sup> C <sub>1</sub> ( <sup>3</sup> J <sub>calc.</sub> ) | 1.2                                | 1.7                                | 4.1                                | 10.0, 7.5                          |
|           | <sup>1</sup> C <sub>4</sub> ( <sup>3</sup> J <sub>calc.</sub> ) | 4.9                                | 7.7                                | 4.4                                | 1.6, 1.6                           |
|           | <sup>3</sup> J <sub>exp.</sub>                                  | 2.0                                | 3.3                                | 5.2                                | 7.9, 6.0                           |
| <b>12</b> | <sup>4</sup> C <sub>1</sub> ( <sup>3</sup> J <sub>calc.</sub> ) | 0.8                                | 2.8                                | 2.5                                | 10.4, 6.3                          |
|           | <sup>1</sup> C <sub>4</sub> ( <sup>3</sup> J <sub>calc.</sub> ) | 5.1                                | 8.5                                | 2.9                                | 0.6, 2.2                           |
|           | <sup>3</sup> J <sub>exp.</sub>                                  | 1.3                                | 4.1                                | n.o.                               | n.o.                               |

<sup>a</sup>Vicinal ring coupling constants (<sup>3</sup>J<sub>HCH</sub>) were calculated from a generalization of the Karplus equation established by Haasnoot et al.<sup>1</sup> as implemented in Maestro version 9.0, Schrödinger, LLC, New York, NY, 2009.

<sup>b</sup>Minimized structure performed with AMBER\* force field as implemented in MacroModel, version 9.9.013 with the GB/SA solvent model for CHCl<sub>3</sub>, Schrödinger, LLC, New York, NY, 2009. The structures of compounds containing phosphorous were minimized with Chem3D 19.0.

<sup>c</sup>Experimental <sup>3</sup>J<sub>HH</sub> extracted from simulated 1D <sup>1</sup>H NMR spectrum using the DAISY program as implemented in TOPSPIN, version 4.0.6, for Bruker.

**Table S2.** Comparison between Experimental and Calculated Ring Coupling Constant of C-(Glycopyranosyl)*N*-methoxyphthalimides.<sup>a</sup>

| Compound  | Conformation <sup>b</sup>                                                     | <sup>3</sup> <i>J</i> <sub>1,2</sub> [Hz] | <sup>3</sup> <i>J</i> <sub>2,3</sub> [Hz] | <sup>3</sup> <i>J</i> <sub>3,4</sub> [Hz] | <sup>3</sup> <i>J</i> <sub>4,5</sub> [Hz] | <i>d</i> O1'-H5 [Å] <sup>c</sup> |
|-----------|-------------------------------------------------------------------------------|-------------------------------------------|-------------------------------------------|-------------------------------------------|-------------------------------------------|----------------------------------|
| <b>16</b> | <sup>4</sup> <i>C</i> <sub>1</sub> ( <sup>3</sup> <i>J</i> <sub>calc.</sub> ) | 5.8                                       | 9.1                                       | 9.4                                       | 9.2                                       | 2.425                            |
|           | <sup>1</sup> <i>C</i> <sub>4</sub> ( <sup>3</sup> <i>J</i> <sub>calc.</sub> ) | 0.3                                       | 2.6                                       | 2.4                                       | 0.9                                       | 5.653                            |
|           | <sup>3</sup> <i>J</i> <sub>exp.</sub> <sup>d</sup>                            | 4.6                                       | 7.1                                       | 6.5                                       | 6.8                                       |                                  |
| <b>17</b> | <sup>4</sup> <i>C</i> <sub>1</sub> ( <sup>3</sup> <i>J</i> <sub>calc.</sub> ) | 6.6                                       | 8.2                                       | 8.6                                       | 9.1                                       | 2.411                            |
|           | <sup>1</sup> <i>C</i> <sub>4</sub> ( <sup>3</sup> <i>J</i> <sub>calc.</sub> ) | 0.3                                       | 2.7                                       | 2.0                                       | 1.0                                       | 5.570                            |
|           | <sup>3</sup> <i>J</i> <sub>exp.</sub>                                         | 5.3                                       | 7.4                                       | 7.0                                       | 7.0                                       |                                  |
| <b>18</b> | <sup>4</sup> <i>C</i> <sub>1</sub> ( <sup>3</sup> <i>J</i> <sub>calc.</sub> ) | 6.6                                       | 8.2                                       | 8.7                                       | 9.2                                       | 2.410                            |
|           | <sup>1</sup> <i>C</i> <sub>4</sub> ( <sup>3</sup> <i>J</i> <sub>calc.</sub> ) | 0.2                                       | 2.8                                       | 2.5                                       | 1.0                                       | 5.565                            |
|           | <sup>3</sup> <i>J</i> <sub>exp.</sub>                                         | 4.3                                       | 6.4                                       | 5.8                                       | 6.2                                       |                                  |
| <b>19</b> | <sup>4</sup> <i>C</i> <sub>1</sub> ( <sup>3</sup> <i>J</i> <sub>calc.</sub> ) | 6.5                                       | 8.2                                       | 8.5                                       | 9.1                                       | 2.280                            |
|           | <sup>1</sup> <i>C</i> <sub>4</sub> ( <sup>3</sup> <i>J</i> <sub>calc.</sub> ) | 0.5                                       | 2.8                                       | 2.1                                       | 1.0                                       | 5.589                            |
|           | <sup>3</sup> <i>J</i> <sub>exp.</sub>                                         | 4.7                                       | 7.3                                       | 7.3                                       | 7.9                                       |                                  |
| <b>20</b> | <sup>4</sup> <i>C</i> <sub>1</sub> ( <sup>3</sup> <i>J</i> <sub>calc.</sub> ) | 6.0                                       | 8.9                                       | 3.1                                       | 0.5                                       | 2.412                            |
|           | <sup>1</sup> <i>C</i> <sub>4</sub> ( <sup>3</sup> <i>J</i> <sub>calc.</sub> ) | 0.1                                       | 3.2                                       | 2.9                                       | 5.8                                       | 5.644                            |
|           | <sup>3</sup> <i>J</i> <sub>exp.</sub>                                         | 5.4                                       | 9.1                                       | 3.2                                       | 2.1                                       |                                  |
| <b>21</b> | <sup>4</sup> <i>C</i> <sub>1</sub> ( <sup>3</sup> <i>J</i> <sub>calc.</sub> ) | 6.1                                       | 9.0                                       | 2.1                                       | -0.1                                      | 2.906                            |
|           | <sup>1</sup> <i>C</i> <sub>4</sub> ( <sup>3</sup> <i>J</i> <sub>calc.</sub> ) | -0.1                                      | 2.8                                       | 3.3                                       | 6.2                                       | 5.583                            |
|           | <sup>3</sup> <i>J</i> <sub>exp.</sub>                                         | 5.6                                       | 8.2                                       | 2.9                                       | 2.7                                       |                                  |
| <b>22</b> | <sup>4</sup> <i>C</i> <sub>1</sub> ( <sup>3</sup> <i>J</i> <sub>calc.</sub> ) | 9.2                                       | 2.8                                       | 3.3                                       | 1.5                                       | 4.540                            |
|           | <sup>1</sup> <i>C</i> <sub>4</sub> ( <sup>3</sup> <i>J</i> <sub>calc.</sub> ) | 2.0                                       | 3.7                                       | 5.4                                       | 6.2                                       | 3.013                            |
|           | <sup>3</sup> <i>J</i> <sub>exp.</sub>                                         | 7.6                                       | 3.2                                       | 5.2                                       | 3.7                                       |                                  |
| <b>23</b> | <sup>4</sup> <i>C</i> <sub>1</sub> ( <sup>3</sup> <i>J</i> <sub>calc.</sub> ) | 0.2                                       | 3.1                                       | 3.1                                       | 5.7                                       | 4.674                            |
|           | <sup>1</sup> <i>C</i> <sub>4</sub> ( <sup>3</sup> <i>J</i> <sub>calc.</sub> ) | 5.7                                       | 9.3                                       | 2.7                                       | 0.7                                       | 3.862                            |
|           | <sup>3</sup> <i>J</i> <sub>exp.</sub>                                         | 5.9                                       | 9.3                                       | 3.4                                       | 2.0                                       |                                  |
| <b>24</b> | <sup>4</sup> <i>C</i> <sub>1</sub> ( <sup>3</sup> <i>J</i> <sub>calc.</sub> ) | 0.3                                       | 2.6                                       | 2.7                                       | 5.3                                       | 4.541                            |
|           | <sup>1</sup> <i>C</i> <sub>4</sub> ( <sup>3</sup> <i>J</i> <sub>calc.</sub> ) | 5.6                                       | 9.3                                       | 2.7                                       | 0.1                                       | 3.031                            |
|           | <sup>3</sup> <i>J</i> <sub>exp.</sub>                                         | 5.0                                       | 7.9                                       | 3.3                                       | 2.5                                       |                                  |

<sup>a</sup>Vicinal ring coupling constants (<sup>3</sup>*J*<sub>HCCH</sub>) were calculated from a generalization of the Karplus equation established by Haasnoot et al.<sup>1</sup> as implemented in Maestro version 9.0, Schrödinger, LLC, New York, NY, 2009.

<sup>b</sup>Minimized structure performed with AMBER\* force field as implemented in MacroModel, version 9.9.013 with the GB/SA solvent model for CHCl<sub>3</sub>, Schrödinger, LLC, New York, NY, 2009. The structures of compounds containing phosphorous were minimized with Chem3D 19.0.

<sup>c</sup>The minimum distance O1'-H5 for each conformational isomer, was calculated performing a coordinate scan calculation of the O1'-C1'-C1-O1 dihedral from -180 to 180° in increments of 5°.

<sup>d</sup>Experimental <sup>3</sup>*J*<sub>HH</sub> extracted from simulated 1D <sup>1</sup>HNMR spectrum using the DAISY program as implemented in TOPSPIN, version 4.0.6, for Bruker.

**Table S3.** Comparison between Experimental and Calculated Ring Coupling Constant of 10-Deoxy-1,6-dioxaspiro[4.5]decane Compounds.<sup>a</sup>

| Compound  | Conformation <sup>b</sup>                                       | <sup>3</sup> J <sub>2a,3</sub> [Hz] | <sup>3</sup> J <sub>2e,3</sub> [Hz] | <sup>3</sup> J <sub>3,4</sub> [Hz] | <sup>3</sup> J <sub>4,5</sub> [Hz] | <sup>3</sup> J <sub>4,5a</sub> [Hz] | <sup>3</sup> J <sub>4,5e</sub> [Hz] |
|-----------|-----------------------------------------------------------------|-------------------------------------|-------------------------------------|------------------------------------|------------------------------------|-------------------------------------|-------------------------------------|
| <b>25</b> | <sup>4</sup> C <sub>1</sub> ( <sup>3</sup> J <sub>calc.</sub> ) | 11.1                                | 4.6                                 | 8.7                                | 9.2                                | --                                  | --                                  |
|           | <sup>1</sup> C <sub>4</sub> ( <sup>3</sup> J <sub>calc.</sub> ) | 2.7                                 | 3.0                                 | 3.2                                | 1.5                                | --                                  | --                                  |
|           | <sup>3</sup> J <sub>exp.</sub> <sup>c</sup>                     | 11.5                                | 5.1                                 | 8.9                                | 9.9                                | --                                  | --                                  |
| <b>31</b> | <sup>4</sup> C <sub>1</sub> ( <sup>3</sup> J <sub>calc.</sub> ) | 2.4                                 | 3.3                                 | 2.8                                | 5.2                                | --                                  | --                                  |
|           | <sup>1</sup> C <sub>4</sub> ( <sup>3</sup> J <sub>calc.</sub> ) | 11.1                                | 4.6                                 | 2.2                                | 0.4                                | --                                  | --                                  |
|           | <sup>3</sup> J <sub>exp.</sub>                                  | 12.1                                | 4.5                                 | 2.7                                | 1.7                                | --                                  | --                                  |
| <b>37</b> | <sup>4</sup> C <sub>1</sub> ( <sup>3</sup> J <sub>calc.</sub> ) | 3.2                                 | 2.5                                 | 4.1                                | --                                 | 10.2                                | 7.1                                 |
|           | <sup>1</sup> C <sub>4</sub> ( <sup>3</sup> J <sub>calc.</sub> ) | 10.0                                | 6.5                                 | 3.8                                | --                                 | 1.2                                 | 1.8                                 |
|           | <sup>3</sup> J <sub>exp.</sub>                                  | 8.7                                 | 6.3                                 | 5.5                                | --                                 | 2.4                                 | 1.0                                 |
| <b>38</b> | <sup>4</sup> C <sub>1</sub> ( <sup>3</sup> J <sub>calc.</sub> ) | 2.5                                 | 3.0                                 | 3.1                                | --                                 | 10.3                                | 6.7                                 |
|           | <sup>1</sup> C <sub>4</sub> ( <sup>3</sup> J <sub>calc.</sub> ) | 10.8                                | 5.3                                 | 2.7                                | --                                 | 0.7                                 | 2.1                                 |
|           | <sup>3</sup> J <sub>exp.</sub>                                  | 11.7                                | 5.3                                 | 3.5                                | --                                 | 2.3                                 | 1.6                                 |

<sup>a</sup>Vicinal ring coupling constants (<sup>3</sup>J<sub>HCCH</sub>) were calculated from a generalization of the Karplus equation established by Haasnoot et al.<sup>1</sup> as implemented in Maestro version 9.0, Schrödinger, LLC, New York, NY, 2009.

<sup>b</sup>Minimized structure performed with AMBER\* force field as implemented in MacroModel, version 9.9.013 with the GB/SA solvent model for CHCl<sub>3</sub>, Schrödinger, LLC, New York, NY, 2009. The structures of compounds containing phosphorous were minimized with Chem3D 19.0.

<sup>c</sup>Experimental <sup>3</sup>J<sub>HH</sub> extracted from simulated 1D <sup>1</sup>H NMR spectrum using the DAISY program as implemented in TOPSPIN, version 4.0.6, for Bruker.

**Table S4.** Comparison between Experimental and Calculated Long-range <sup>4</sup>J<sub>w</sub> Coupling Constants.

| Compound                         | Conformation                | Φ <sub>1</sub> [°] <sup>a</sup> | Φ <sub>2</sub> [°] <sup>a</sup> | <sup>4</sup> J <sub>w</sub>     | <sup>4</sup> J <sub>calc.</sub> [Hz] <sup>b</sup> | <sup>4</sup> J <sub>exp.</sub> [Hz] <sup>c</sup> |
|----------------------------------|-----------------------------|---------------------------------|---------------------------------|---------------------------------|---------------------------------------------------|--------------------------------------------------|
| <b>31</b>                        | <sup>1</sup> C <sub>4</sub> | 176.2                           | -176.8                          | <sup>4</sup> J <sub>2a,4</sub>  | 1.3                                               | 1.3                                              |
| [PhCH- <sup>2</sup> H] <b>31</b> | <sup>1</sup> C <sub>4</sub> | 173.8                           | -173.5                          | <sup>4</sup> J <sub>2a,4</sub>  | 1.3                                               | 1.0                                              |
| <b>45</b>                        | <sup>4</sup> C <sub>1</sub> | -168.6                          | -160.2                          | <sup>4</sup> J <sub>2,1'a</sub> | 1.1                                               | 1.1                                              |
| <b>46</b>                        | <sup>1</sup> H <sub>2</sub> | 164.1                           | 161.9                           | <sup>4</sup> J <sub>2,4</sub>   | 1.1                                               | 1.5                                              |
| <b>47</b>                        | <sup>1</sup> C <sub>4</sub> | 170.4                           | -164.7                          | <sup>4</sup> J <sub>2,4</sub>   | 1.2                                               | 1.2                                              |
| (5- <sup>2</sup> H) <b>47</b>    | <sup>1</sup> C <sub>4</sub> | 170.4                           | -164.7                          | <sup>4</sup> J <sub>2,4</sub>   | 1.2                                               | 1.2                                              |
| <b>53</b>                        | <sup>4</sup> C <sub>1</sub> | -171.8                          | -158.5                          | <sup>4</sup> J <sub>2,1'a</sub> | 1.1                                               | 1.1                                              |

<sup>a</sup>Dihedral angles calculated over minimized structures using AMBER\* force field as implemented in MacroModel, version 9.9.013 with the GB/SA solvent model for CHCl<sub>3</sub>, Schrödinger, LLC, New York, NY, 2009.

<sup>b</sup>Long-range <sup>4</sup>J<sub>HH</sub> were calculated from three-parameters equation (<sup>4</sup>J<sub>HH</sub> = cos<sup>2</sup> Φ<sub>1</sub> + cos<sup>2</sup> Φ<sub>2</sub> - 0.7) as established by Abraham et al.<sup>2</sup>

<sup>c</sup>All experimental <sup>4</sup>J<sub>HH</sub> were extracted from simulated 1D <sup>1</sup>H NMR spectra using the DAISY program as implemented in TOPSPIN, version 4.0.6, for Bruker.

$^1\text{C}_4$   
D/H 1.5:1, dr = 4:1

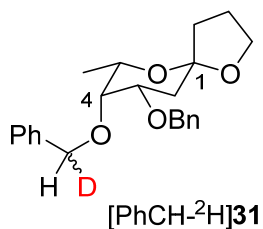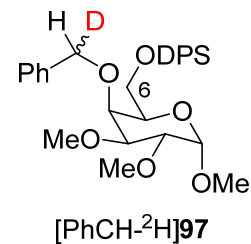

$^4\text{C}_1$   
D/H 7:1, dr = 1:1

**Table S5.** Selected signals of  $^1\text{H}$  NMR spectra of labelled [PhCH- $^2\text{H}$ ]31 and [PhCH- $^2\text{H}$ ]97.

| Compound                | 6-H [ppm] (rel. int.)                                              |                                                                                     | 2- $\text{H}_{\text{ax}}$ [ppm] (rel. int.) |                                      | 3- $\text{H}_{\text{ax}}$ [ppm] (rel. int.) |                        | 4-PhCHD-O [ppm] (rel. int.)                                                 |                                                                            |
|-------------------------|--------------------------------------------------------------------|-------------------------------------------------------------------------------------|---------------------------------------------|--------------------------------------|---------------------------------------------|------------------------|-----------------------------------------------------------------------------|----------------------------------------------------------------------------|
|                         | $\text{CDCl}_3$                                                    | $\text{C}_6\text{D}_6$                                                              | $\text{CDCl}_3$                             | $\text{C}_6\text{D}_6$               | $\text{CDCl}_3$                             | $\text{C}_6\text{D}_6$ | $\text{CDCl}_3$                                                             | $\text{C}_6\text{D}_6$                                                     |
| [PhCH- $^2\text{H}$ ]31 | 1.130 (d, 1.5H) <sup>a</sup><br>1.133 (d, 0.3H)<br>1.135 (d, 1.2H) | 1.276 (d, 1.5H) <sup>a</sup><br>1.280 (d, 1.5H)                                     | 2.32 (dd, 1H)                               | 2.494 (dd, 0.5H)<br>2.496 (dd, 0.5H) | 3.929 (ddd, 0.5H)<br>3.931 (ddd, 0.5H)      | 4.02 (ddd, 1H)         | 4.71 (br s, 0.1H)<br>4.72 (d, 0.4H)<br>4.93 (br s, 0.5H)<br>4.95 (d, 0.4H)  | 4.57 (br s, 0.1H)<br>4.59 (d, 0.4H)<br>5.02 (br s, 0.5H)<br>5.05 (d, 0.4H) |
| [PhCH- $^2\text{H}$ ]97 | n. o. <sup>b, c</sup>                                              | 4.05 (dd, 0.5) <sup>b</sup><br>4.06 (dd, 0.5)<br>4.107 (dd, 0.5)<br>4.105 (dd, 0.5) | n. o. <sup>c</sup>                          | n. o. <sup>c</sup>                   | 3.56 (dd, 1H)                               | 3.73 (dd, 1H)          | 4.589 (br s, 0.4H)<br>4.60 (d, 0.1H)<br>4.90 (br s, 0.4H)<br>4.91 (d, 0.1H) | 4.58 (br s, 0.4H)<br>4.61 (d, 0.1H)<br>5.05 (br s, 0.4H)<br>5.07 (d, 0.1H) |

<sup>a</sup>6-Me. <sup>b</sup>6-CH<sub>2</sub>. <sup>c</sup>Not observed, overlapped with other signals.

**Table S6.** Selected signals of  $^{13}\text{C}\{\text{H}\}$  NMR spectra of labelled [PhCH- $^2\text{H}$ ]31 and [PhCH- $^2\text{H}$ ]97.

| Compound                | C4 [ppm] (rel. int.)                         |                                              | 4-PhCHD-O [ppm] (rel. int.)                                     |                                                                                                                |
|-------------------------|----------------------------------------------|----------------------------------------------|-----------------------------------------------------------------|----------------------------------------------------------------------------------------------------------------|
|                         | $\text{CDCl}_3$                              | $\text{C}_6\text{D}_6$                       | $\text{CDCl}_3$                                                 | $\text{C}_6\text{D}_6$                                                                                         |
| [PhCH- $^2\text{H}$ ]31 | 74.97 (0.5)<br>75.02 (0.1)<br>75.09 (0.4)    | 76.85 (0.5)<br>76.88 (0.1)<br>76.93 (0.4)    | 73.59 (t, $J_{\text{CD}} = 22.1$ Hz) (0.6)<br>74.18 (s) (0.4)   | 74.85 (t, $J_{\text{CD}} = 22.1$ Hz) (0.6)<br>75.26 (s) (0.4)                                                  |
| [PhCH- $^2\text{H}$ ]97 | 73.56 (0.44)<br>73.59 (0.44)<br>73.64 (0.12) | 75.48 (0.44)<br>75.51 (0.44)<br>75.55 (0.12) | 74.35 (t, $J_{\text{CD}} = 22.1$ Hz) (0.88)<br>74.73 (s) (0.12) | 75.05 (t, $J_{\text{CD}} = 21.1$ Hz) (0.44)<br>75.08 (t, $J_{\text{CD}} = 22.1$ Hz) (0.44)<br>75.45 (s) (0.12) |

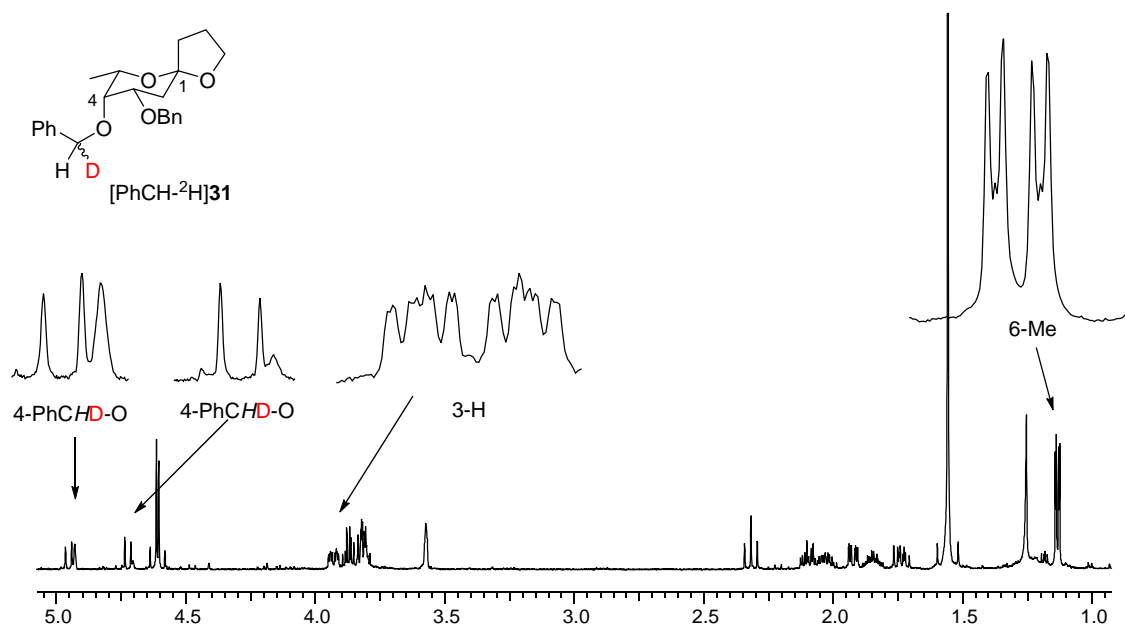

**Figure S1.** <sup>1</sup>H NMR (500 MHz, CDCl<sub>3</sub>) of [PhCH-<sup>2</sup>H]31 (D/H 1.5:1, dr = 4:1) as a 1*R*/1*S* mixture (85:15), only major isomer shown.

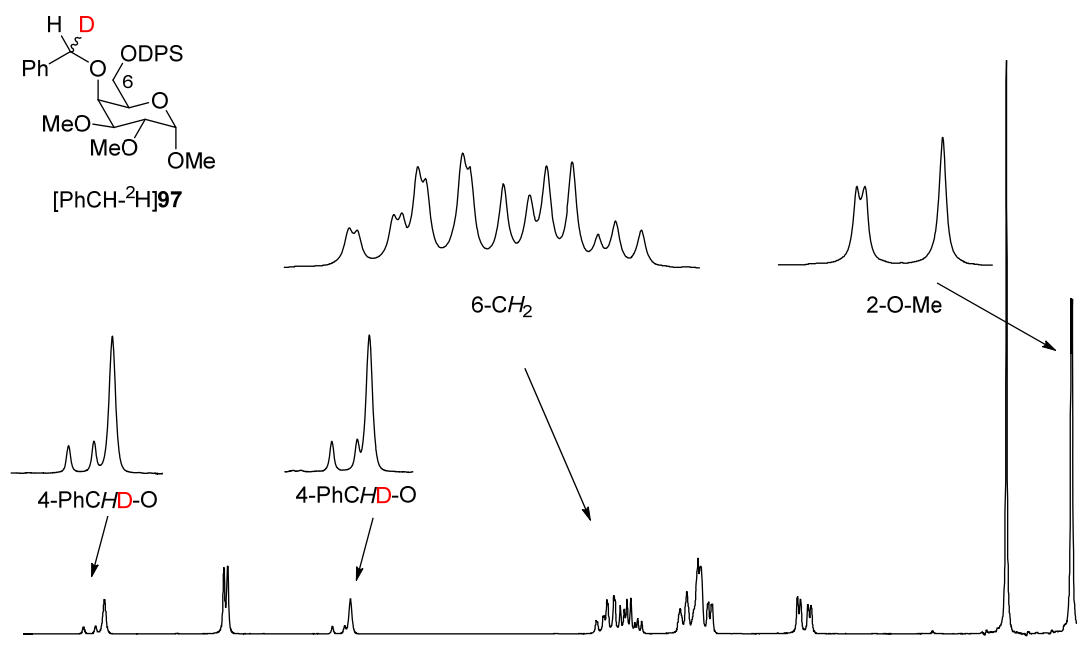

**Figure S2.** <sup>1</sup>H NMR (500 MHz, C<sub>6</sub>D<sub>6</sub>) of [PhCH-<sup>2</sup>H]97 (D/H 7:1, dr = 1:1).

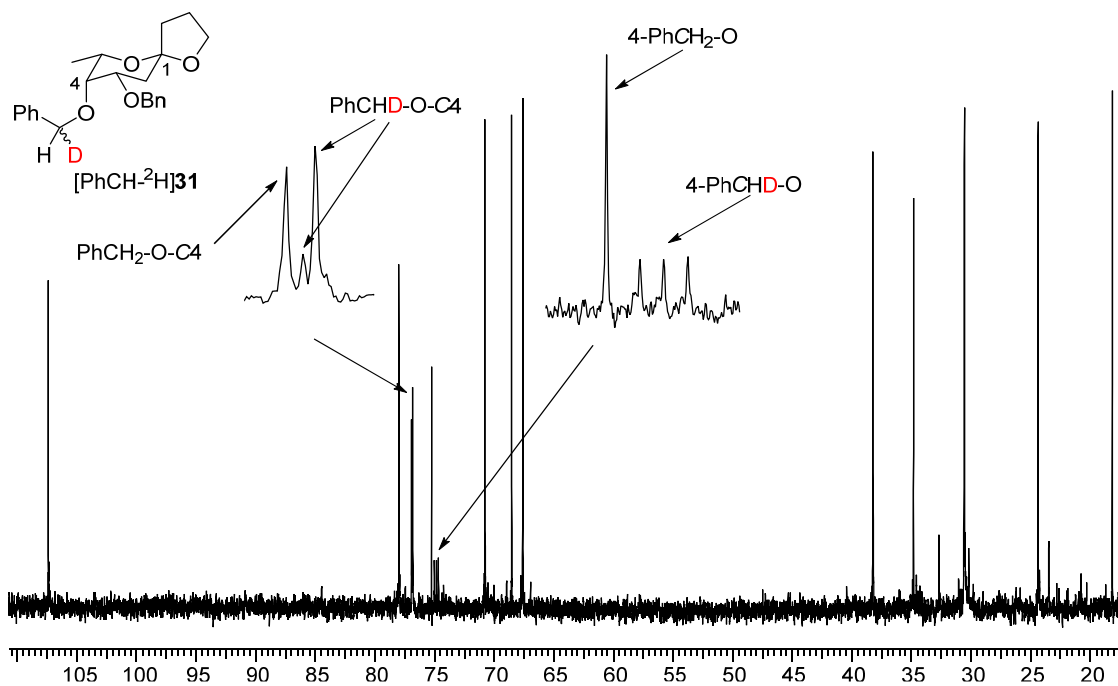

**Figure S3.**  $^{13}\text{C}\{\text{H}\}$  NMR (125.7 MHz,  $\text{C}_6\text{D}_6$ ) of [PhCH-<sup>2</sup>H]31 (D/H 1.5:1, dr = 4:1) as a 1*R*/1*S* mixture (85:15), only major isomer shown.

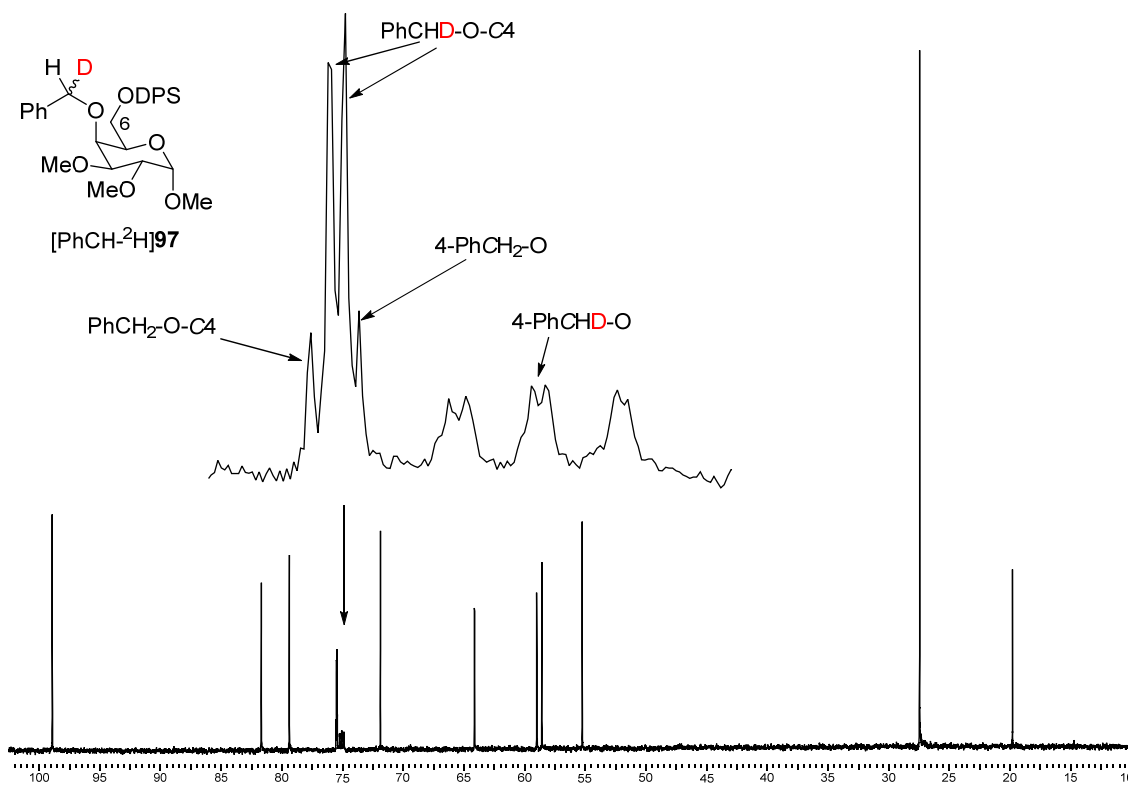

**Figure S4.**  $^{13}\text{C}\{\text{H}\}$  NMR (125.7 MHz,  $\text{C}_6\text{D}_6$ ) of [PhCH-<sup>2</sup>H]97 (D/H 7:1, dr = 1:1).



**Table S7.** Comparison between Experimental and Calculated Ring Coupling Constant of 4-Deoxy-6,8-dioxabicyclo[3.2.1]octane Compounds.<sup>a</sup>

| Compound                      | Conformation                                     | <sup>3</sup> J <sub>1,2</sub> [Hz] | <sup>3</sup> J <sub>2,3</sub> [Hz] | <sup>3</sup> J <sub>3,4a</sub> [Hz] | <sup>3</sup> J <sub>3,4e</sub> [Hz] | <sup>3</sup> J <sub>1,1'a</sub> [Hz] | <sup>3</sup> J <sub>1,1'b</sub> [Hz] |
|-------------------------------|--------------------------------------------------|------------------------------------|------------------------------------|-------------------------------------|-------------------------------------|--------------------------------------|--------------------------------------|
| <b>45</b>                     | <sup>4</sup> C <sub>1</sub> (Calc.) <sup>b</sup> | 3.6                                | 7.5                                | 10.2                                | 6.3                                 | 6.1                                  | 1.1                                  |
|                               | Exper. <sup>c</sup>                              | 4.3                                | 8.0                                | 10.1                                | 6.6                                 | 5.0                                  | 0.0                                  |
| <b>53</b>                     | <sup>4</sup> C <sub>1</sub> (Calc.)              | 4.2                                | 6.7                                | 9.5                                 | 6.8                                 | 6.4                                  | 1.7                                  |
|                               | Exper.                                           | 3.9                                | 7.8                                | 10.0                                | 6.5                                 | 5.1                                  | 0.0                                  |
| [4- <sup>2</sup> H] <b>55</b> | <sup>1</sup> C <sub>4</sub> (Calc.)              | 3.4                                | 7.6                                | 10.2                                | 6.2                                 | 6.3                                  | 1.3                                  |
|                               | Exper.                                           | 4.7                                | 8.2                                | n.o.                                | 6-7                                 | 4.7                                  | 0.0                                  |
| <b>61</b>                     | <sup>1</sup> C <sub>4</sub> (Calc.)              | 2.6                                | 3.2                                | 10.3                                | 6.1                                 | 6.3                                  | 1.2                                  |
|                               | Exper.                                           | 2.8                                | 4.1                                | 11.1                                | 6.0                                 | 5.8                                  | 0.9                                  |

<sup>a</sup>Vicinal ring coupling constants (<sup>3</sup>J<sub>HCH</sub>) were calculated from a generalization of the Karplus equation established by Haasnoot et al.<sup>1</sup> as implemented in Maestro version 9.0, Schrödinger, LLC, New York, NY, 2009.

<sup>b</sup>Minimized structure performed with AMBER\* force field as implemented in MacroModel, version 9.9.013 with the GB/SA solvent model for CHCl<sub>3</sub>, Schrödinger, LLC, New York, NY, 2009. The structures of compounds containing phosphorous were minimized with Chem3D 19.0.

<sup>c</sup>Experimental <sup>3</sup>J<sub>HH</sub> extracted from simulated 1D <sup>1</sup>H NMR spectrum using the DAISY program as implemented in TOPSPIN, version 4.0.6, for Bruker

**Table S8.** Comparison between Experimental and Calculated Ring Coupling Constant of 3-C-( $\alpha$ -D-ribofuranosyl)1-propoxyphthalimides.

| Compound  | Conformation <sup>a</sup>                                                | <sup>3</sup> J <sub>HH</sub>                | <sup>3</sup> J <sub>1,2</sub> [Hz] | <sup>3</sup> J <sub>2,3</sub> [Hz] | <sup>3</sup> J <sub>3,4</sub> [Hz] |
|-----------|--------------------------------------------------------------------------|---------------------------------------------|------------------------------------|------------------------------------|------------------------------------|
| <b>13</b> | <sup>3</sup> T <sub>2</sub> [27%, P <sub>N</sub> = 2°, $\phi_m$ = 13°]   | <sup>3</sup> J <sub>calc.</sub>             | 5.69                               | 6.49                               | 3.86                               |
|           | <sup>3</sup> T <sub>2</sub> [73%, P <sub>S</sub> = 354°, $\phi_m$ = 48°] | <sup>3</sup> J <sub>calc.</sub>             | 2.56                               | 3.99                               | 7.70                               |
|           |                                                                          | <sup>3</sup> J <sub>avg.</sub>              | 3.40                               | 4.66                               | 6.67                               |
|           |                                                                          | <sup>3</sup> J <sub>exp.</sub> <sup>b</sup> | 3.40                               | 4.66                               | 6.67                               |
| <b>14</b> | <sup>3</sup> T <sub>2</sub> [55%, P <sub>N</sub> = 358°, $\phi_m$ = 57°] | <sup>3</sup> J <sub>calc.</sub>             | 2.06                               | 3.05                               | 8.72                               |
|           | <sup>2</sup> T <sub>3</sub> [45%, P <sub>S</sub> = 179°, $\phi_m$ = 3°]  | <sup>3</sup> J <sub>calc.</sub>             | 6.49                               | 6.53                               | 2.11                               |
|           |                                                                          | <sup>3</sup> J <sub>avg.</sub>              | 4.06                               | 4.62                               | 5.74                               |
|           |                                                                          | <sup>3</sup> J <sub>exp.</sub> <sup>b</sup> | 4.06                               | 4.62                               | 5.74                               |
| <b>15</b> | <sup>3</sup> T <sub>2</sub> [100%, P <sub>S</sub> = 9°, $\phi_m$ = 52°]  | <sup>3</sup> J <sub>calc.</sub>             | 3.05                               | 3.61                               | 8.84                               |
|           | <sup>3</sup> T <sub>2</sub> [0%, P <sub>S</sub> = 1°, $\phi_m$ = 20°]    | <sup>3</sup> J <sub>calc.</sub>             | 5.20                               | 6.24                               | 4.70                               |
|           |                                                                          | <sup>3</sup> J <sub>avg.</sub>              | 3.05                               | 3.61                               | 8.84                               |
|           |                                                                          | <sup>3</sup> J <sub>exp.</sub> <sup>b</sup> | 2.88                               | 3.88                               | 9.06                               |

<sup>a</sup>The conformation of the five-membered ring has been established by pseudorotational analysis and designed using the Altona-Sundaralingam phase angle (*P*) and puckering amplitude ( $\phi_m$ ).<sup>3</sup>

<sup>b</sup>Experimental <sup>3</sup>J<sub>HH</sub> extracted from simulated 1D <sup>1</sup>H NMR spectrum using the DAISY program as implemented in TOPSPIN, version 4.0.6, for Bruker.

**Table S9.** Reactivity Differences between LGs in the 1,5-Hydrogen Atom Transfer–Surzur-Tanner-rearrangement Sequence for the Synthesis of 1,6-Dioxaspiro[4.5]decane and 6,8-Dioxabicyclo[3.2.1]octane Scaffolds.<sup>a</sup>

| Compound  | Sugar Ring                        | LG                   | Method | Product                          | Yield (%) |
|-----------|-----------------------------------|----------------------|--------|----------------------------------|-----------|
| <b>1</b>  | $\alpha$ -D- <i>gluco</i>         | Ac                   | B      | <b>25</b>                        | 50        |
| <b>2</b>  |                                   | PO(OPh) <sub>2</sub> | D      | (2- <sup>2</sup> H) <b>25</b>    | 62        |
| <b>3</b>  | $\beta$ -D- <i>gluco</i>          | Ac                   | D      | (2- <sup>2</sup> H) <b>25</b>    | 33        |
| <b>4</b>  |                                   | PO(OPh) <sub>2</sub> | D      | (2- <sup>2</sup> H) <b>25</b>    | 55        |
| <b>5</b>  | $\alpha$ -D- <i>manno</i>         | Ac                   | D      | --                               | --        |
| <b>6</b>  |                                   | PO(OPh) <sub>2</sub> | D      | (2- <sup>2</sup> H) <b>25</b>    | 52        |
| <b>7</b>  | $\beta$ -D- <i>manno</i>          | Ac                   | E      | [2- <sup>2</sup> H] <b>25</b>    | 50        |
| <b>8</b>  |                                   | PO(OPh) <sub>2</sub> | E      | [2- <sup>2</sup> H] <b>25</b>    | 65        |
| <b>9</b>  | $\alpha$ -L- <i>fuco</i>          | Ac                   | D      | [PhCH- <sup>2</sup> H] <b>31</b> | 53        |
| <b>10</b> |                                   | PO(OPh) <sub>2</sub> | A      | <b>31</b>                        | 52        |
| <b>11</b> | $\alpha,\beta$ -D- <i>arabino</i> | PO(OPh) <sub>2</sub> | A      | <b>37</b>                        | 60        |
| <b>12</b> | $\beta$ -D- <i>arabino</i>        | PO(OPh) <sub>2</sub> | D      | [2- <sup>2</sup> H] <b>38</b>    | 63        |
| <b>13</b> | $\alpha$ -D- <i>ribo</i>          | Ac                   | E      | [2- <sup>2</sup> H] <b>39</b>    | 40        |
| <b>14</b> |                                   | Tf                   | A      | <b>39</b>                        | 46        |
| <b>15</b> |                                   | PO(OPh) <sub>2</sub> | A      | <b>42 + 43</b>                   | 62        |
| <b>16</b> | $\alpha$ -D- <i>gluco</i>         | Ac                   | E      | [4- <sup>2</sup> H] <b>45</b>    | 39        |
| <b>17</b> |                                   | PO(OPh) <sub>2</sub> | D      | [4- <sup>2</sup> H] <b>45</b>    | 58        |
| <b>18</b> |                                   | Ts                   | D      | [4- <sup>2</sup> H] <b>45</b>    | 58        |
| <b>19</b> |                                   | PO(OPh) <sub>2</sub> | A      | <b>53</b>                        | 30        |
| <b>20</b> | $\alpha$ -D- <i>galacto</i>       | Ac                   | G      | <b>45</b>                        | 21        |
| <b>21</b> |                                   | PO(OPh) <sub>2</sub> | E      | [4- <sup>2</sup> H] <b>45</b>    | 41        |
| <b>22</b> | $\alpha$ -L- <i>rhamno</i>        | PO(OPh) <sub>2</sub> | E      | [4- <sup>2</sup> H] <b>61</b>    | 66        |
| <b>23</b> | $\alpha$ -L- <i>fuco</i>          | Ac                   | G      | <b>55</b>                        | 23        |
| <b>24</b> |                                   | PO(OPh) <sub>2</sub> | E      | [4- <sup>2</sup> H] <b>55</b>    | 41        |

<sup>a</sup>Reagents and Conditions: Method A: *n*-Bu<sub>3</sub>SnH (1 equiv), AIBN (0.1 equiv), PhCH<sub>3</sub> (0.013 M), reflux. Method B: *n*-Bu<sub>3</sub>SnH (1 equiv/h), AIBN (0.1 equiv), PhCH<sub>3</sub> (0.013 M), reflux. Method D: *n*-Bu<sub>3</sub>SnD (1 equiv), AIBN (0.1 equiv), PhCH<sub>3</sub> (0.013 M), reflux. Method E: *n*-Bu<sub>3</sub>SnD (1 equiv), BF<sub>3</sub>•Et<sub>2</sub>O (0.2 equiv), AIBN (0.1 equiv), PhCH<sub>3</sub> (0.013 M), reflux. Method G: Hantzsch ester (0.37 equiv/h), *fac*-Ir(ppy)<sub>3</sub> (0.01 equiv), THF (0.007M), rt, blue LED.

## References

- (1) Haasnoot, C. A. G.; de Leeuw, F. A. A. M.; Altona, C. The Relationship between Proton-Proton NMR Coupling Constants and Substituent Electronegativities-I. An Empirical Generalization of the Karplus Equation. *Tetrahedron* **1980**, *36*, 2783–2792. [https://doi.org/10.1016/0040-4020\(80\)80155-4](https://doi.org/10.1016/0040-4020(80)80155-4).
- (2) Abraham, R. J.; Gottschalk, H.; Paulsen, H.; Thomas, W. A. The Proton Magnetic Resonance Spectra and Conformations of Cyclic Compounds. Part II. The p.m.r. Spectra of the Conduritols. *J. Chem. Soc.* **1965**, 6268–6277. <https://doi.org/10.1039/jr9650006268>.
- (3) Program Matlab GUI as described in the following: (a) Hendrickx, P. M.; Martins, J. C. A User-Friendly Matlab Program and GUI for the Pseudorotation Analysis of Saturated Five-Membered Ring Systems Based on Scalar Coupling Constants. *Chem. Cent. J.* **2008**, *2*, 20. <https://doi.org/10.1186/1752-153X-2-20>. For a description of the pseudorotation concept, see: (b) Altona, C.; Sundaralingam, M. Conformational Analysis of the Sugar Ring in Nucleosides and Nucleotides. A New Description Using the Concept of Pseudorotation. *J. Am. Chem. Soc.* **1972**, *94*, 8205–8212. <https://doi.org/10.1021/ja00778a043>. (c) Houseknecht, J. B.; Altona, C.; Hadad, C. M.; Lowary, T. L. Conformational Analysis of Furanose Rings with PSEUROT: Parametrization for Rings Possessing the Arabino, Lyxo, Ribo, and Xylo Stereochemistry and Application to Arabinofuranosides. *J. Org. Chem.* **2002**, *67*, 4647–4651. <https://doi.org/10.1021/jo025635q>.

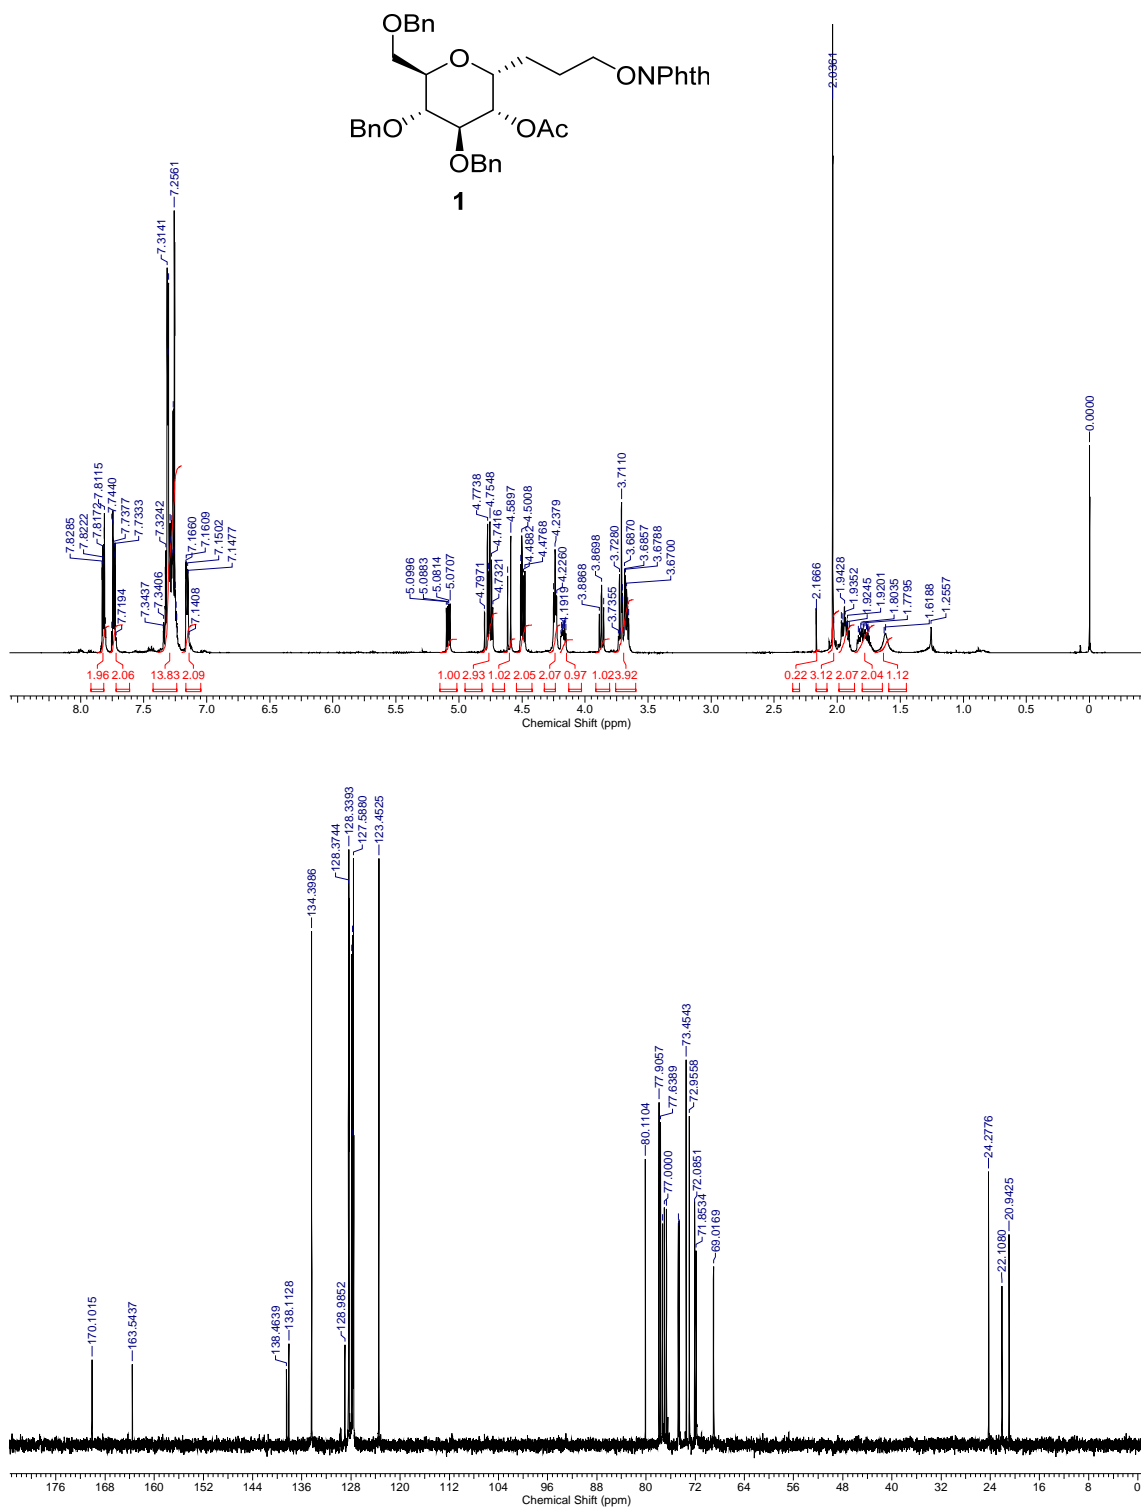

**Fig. S5.** <sup>1</sup>H NMR (500 MHz, CDCl<sub>3</sub>) and <sup>13</sup>C{H} NMR (100.6 MHz, CDCl<sub>3</sub>) of compound **1**.

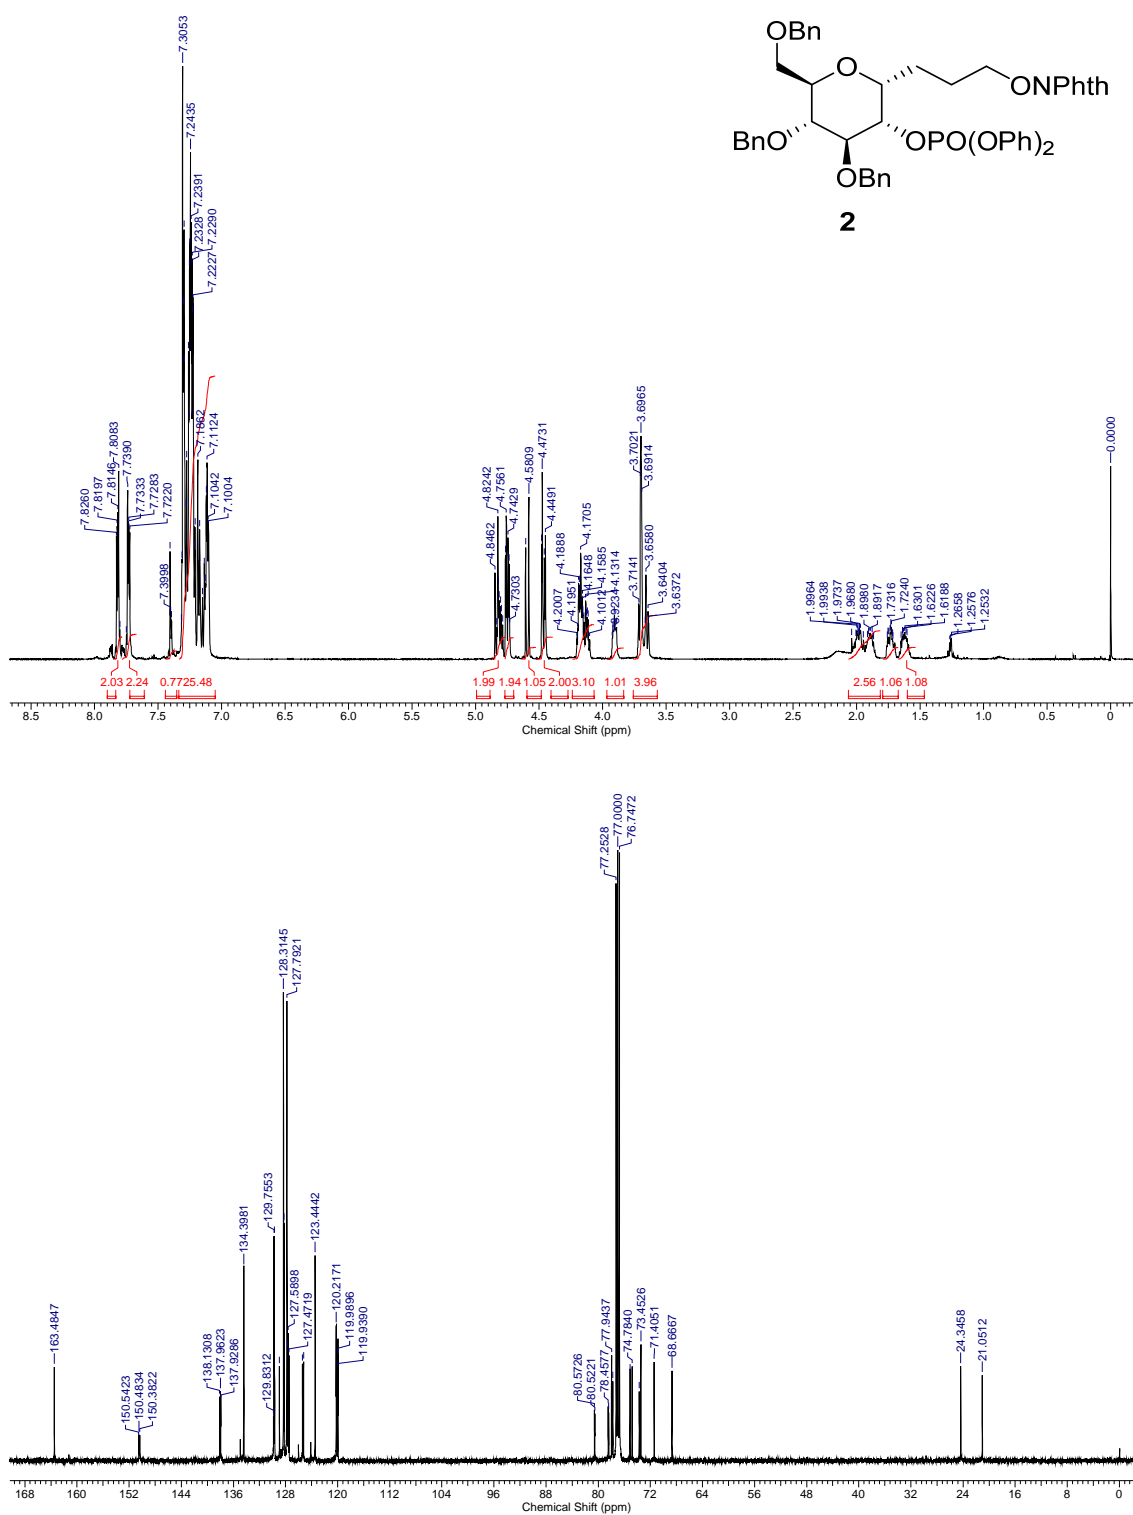

**Fig. S6.** <sup>1</sup>H NMR (500 MHz, CDCl<sub>3</sub>) and <sup>13</sup>C{H} NMR (125.7 MHz, CDCl<sub>3</sub>) of compound **2**.

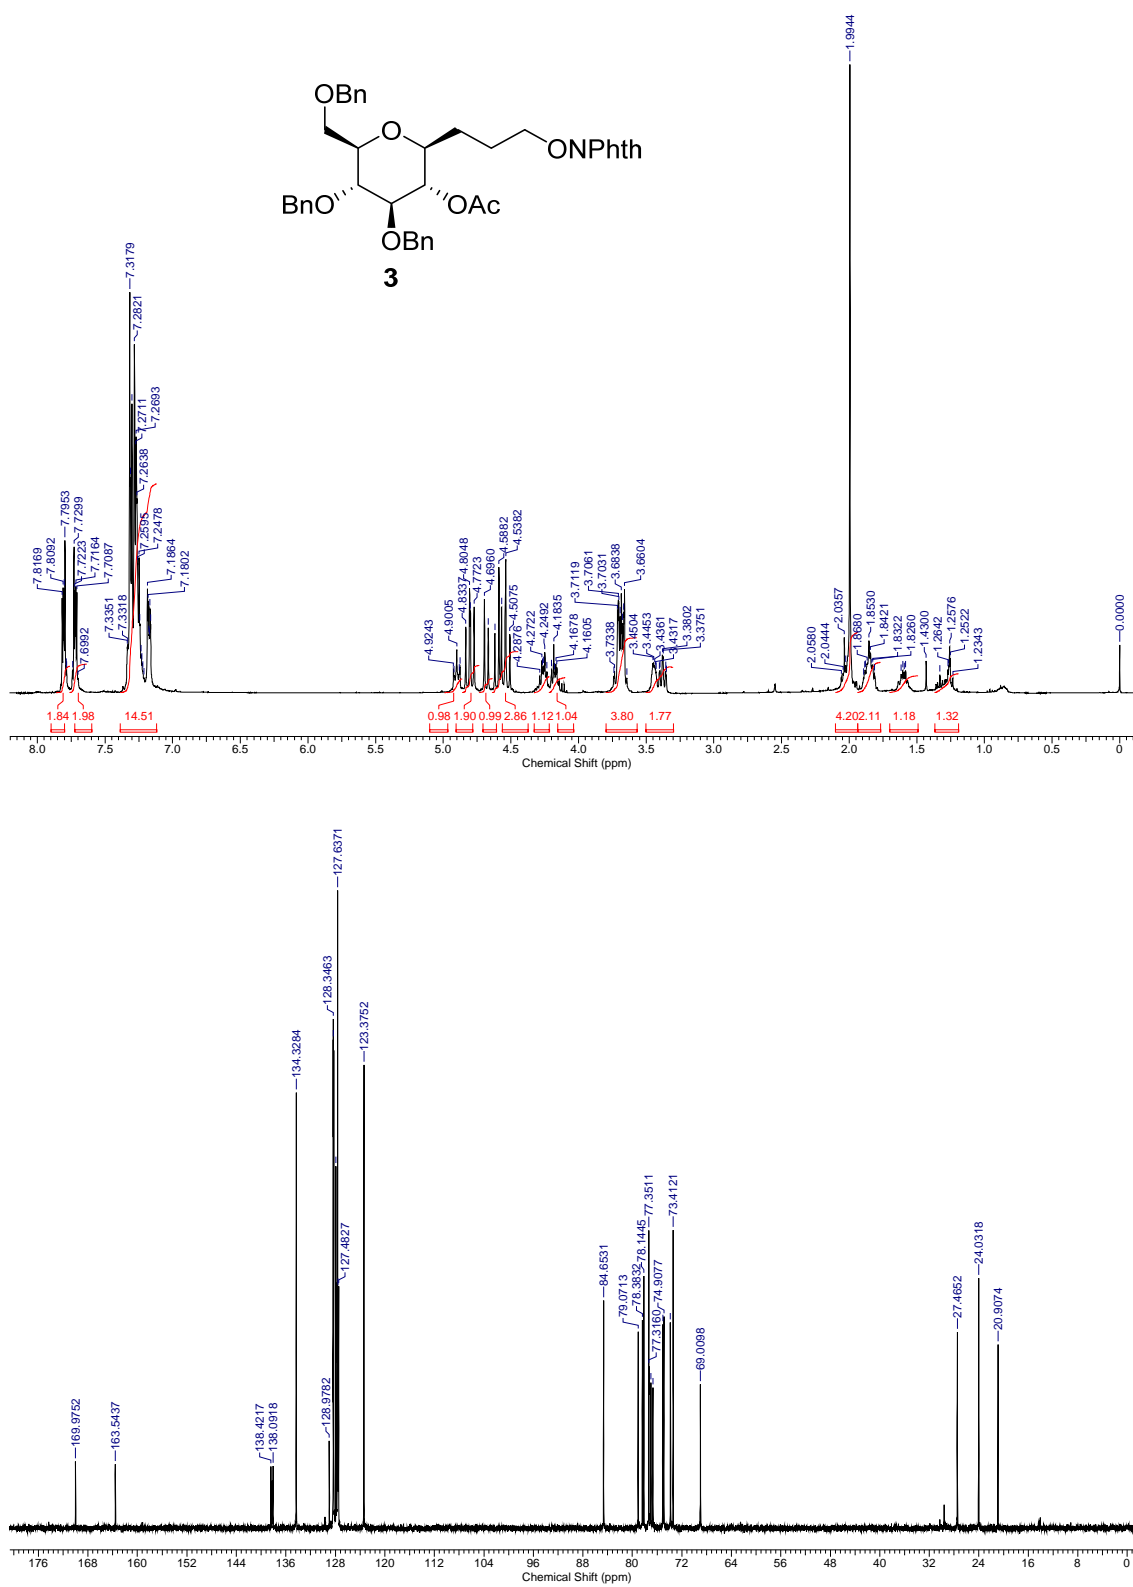

**Fig. S7.** <sup>1</sup>H NMR (400 MHz, CDCl<sub>3</sub>) and <sup>13</sup>C{H} NMR (100.6 MHz, CDCl<sub>3</sub>) of compound **3**.

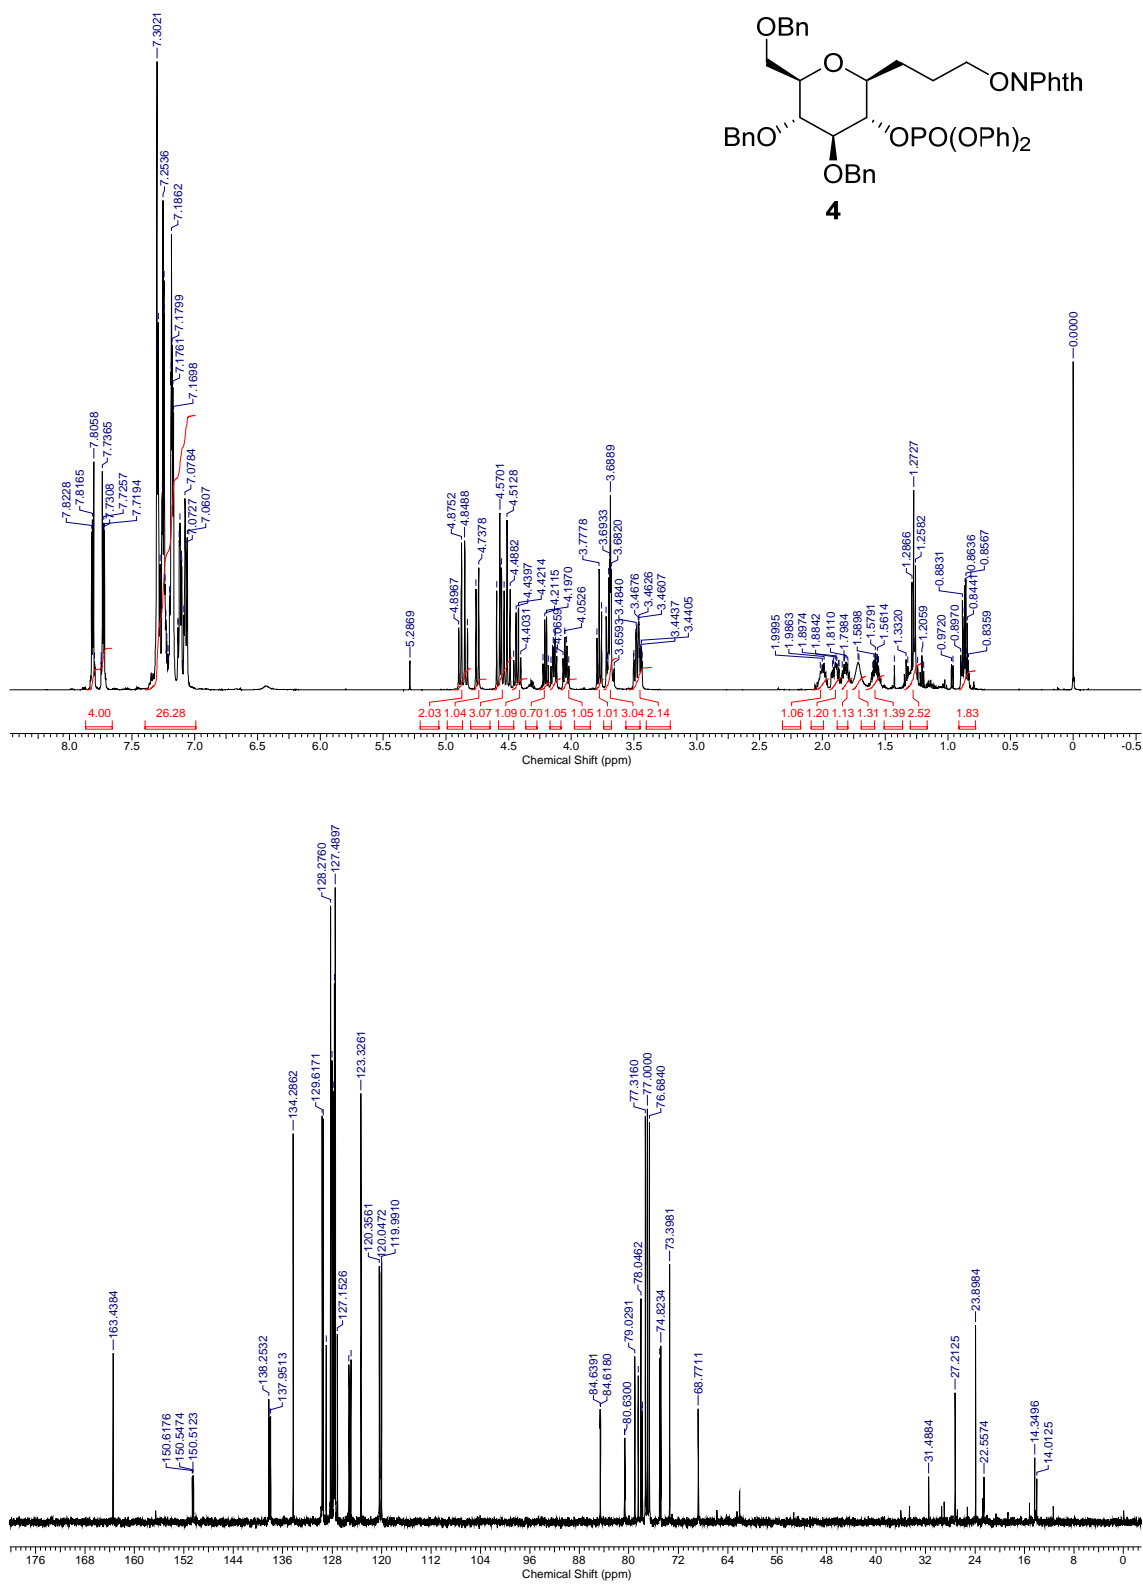

**Fig. S8.** <sup>1</sup>H NMR (500 MHz, CDCl<sub>3</sub>) and <sup>13</sup>C{H} NMR (100.6 MHz, CDCl<sub>3</sub>) of compound **4**.

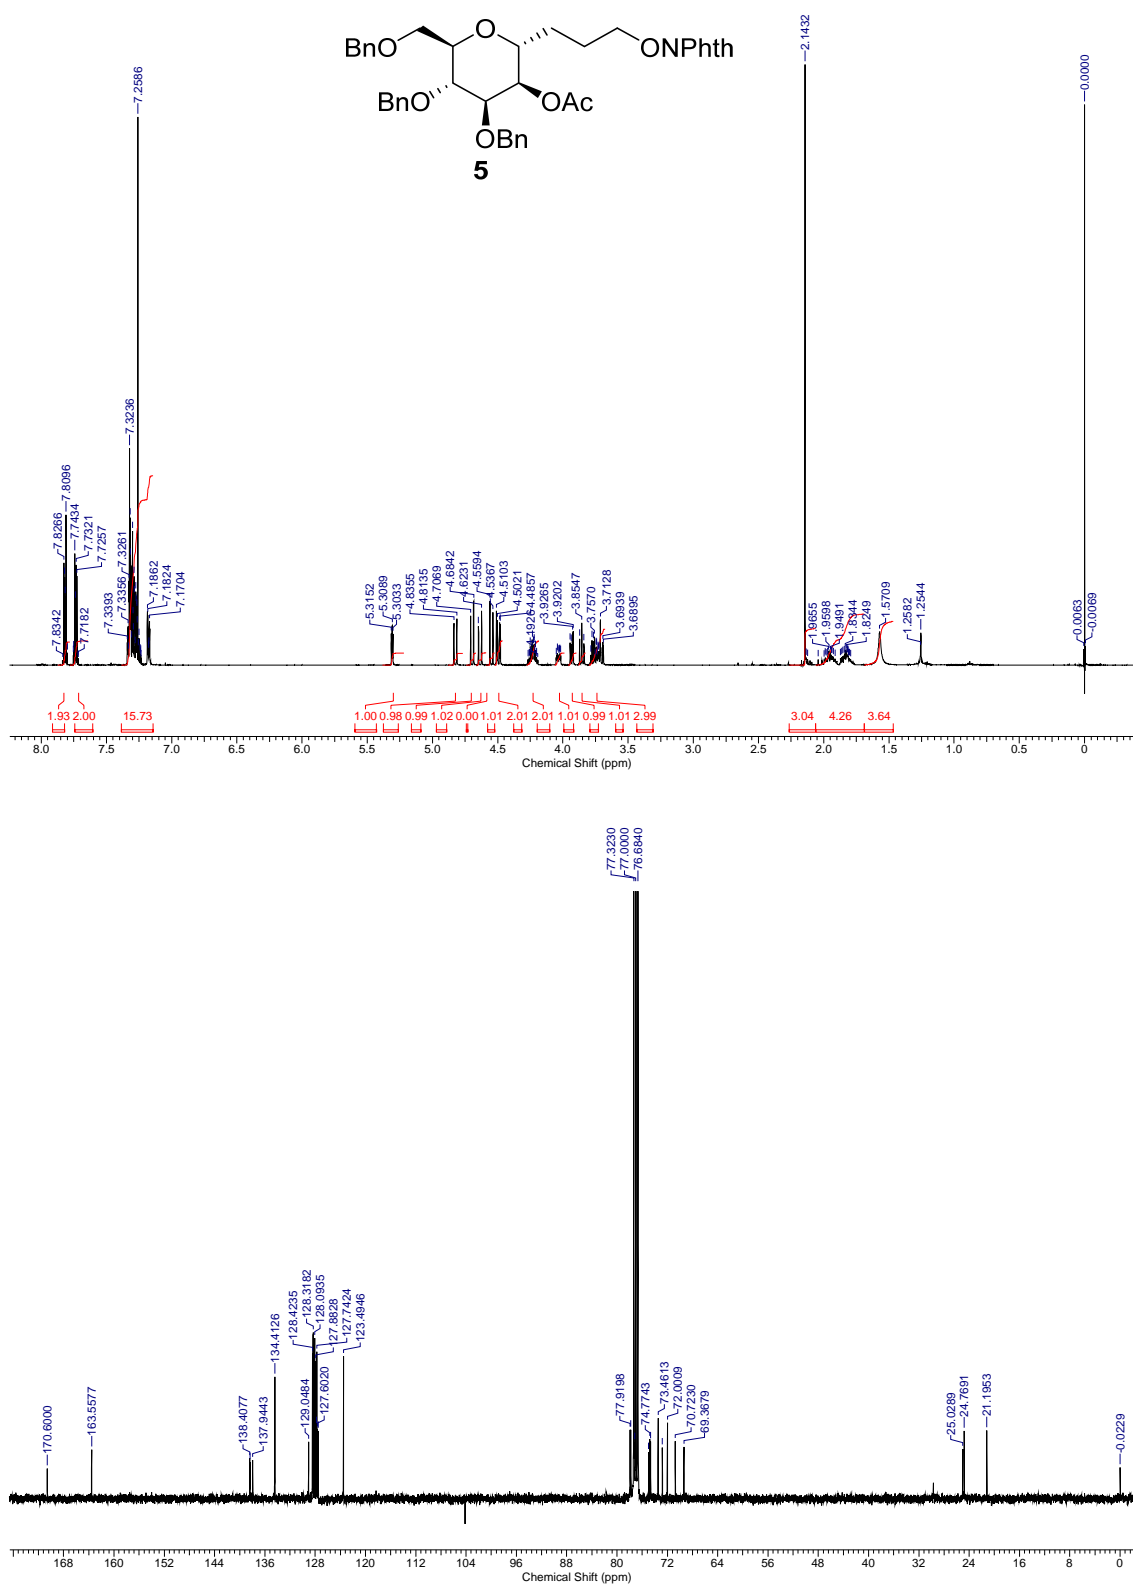

**Fig. S9.** <sup>1</sup>H NMR (500 MHz, CDCl<sub>3</sub>) and <sup>13</sup>C{H} NMR (100.6 MHz, CDCl<sub>3</sub>) of compound **5**.

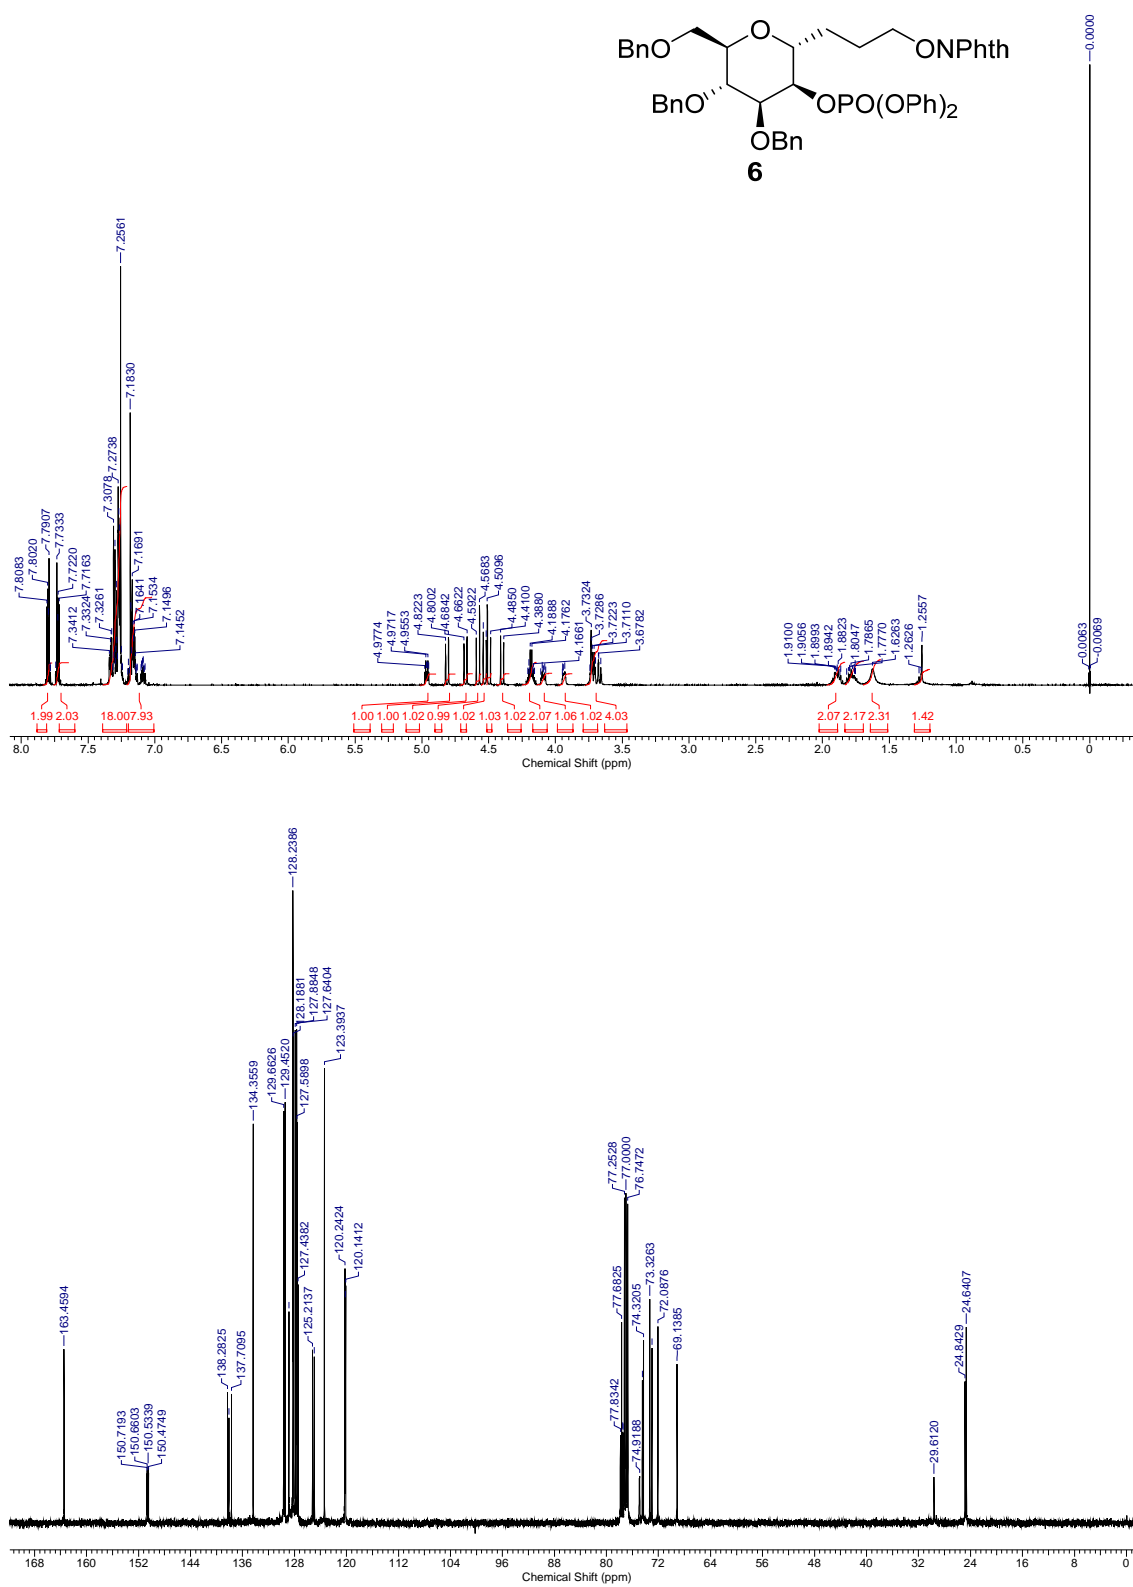

**Fig. S10.** <sup>1</sup>H NMR (500 MHz, CDCl<sub>3</sub>) and <sup>13</sup>C{<sup>1</sup>H} NMR (125.7 MHz, CDCl<sub>3</sub>) of compound **6**.



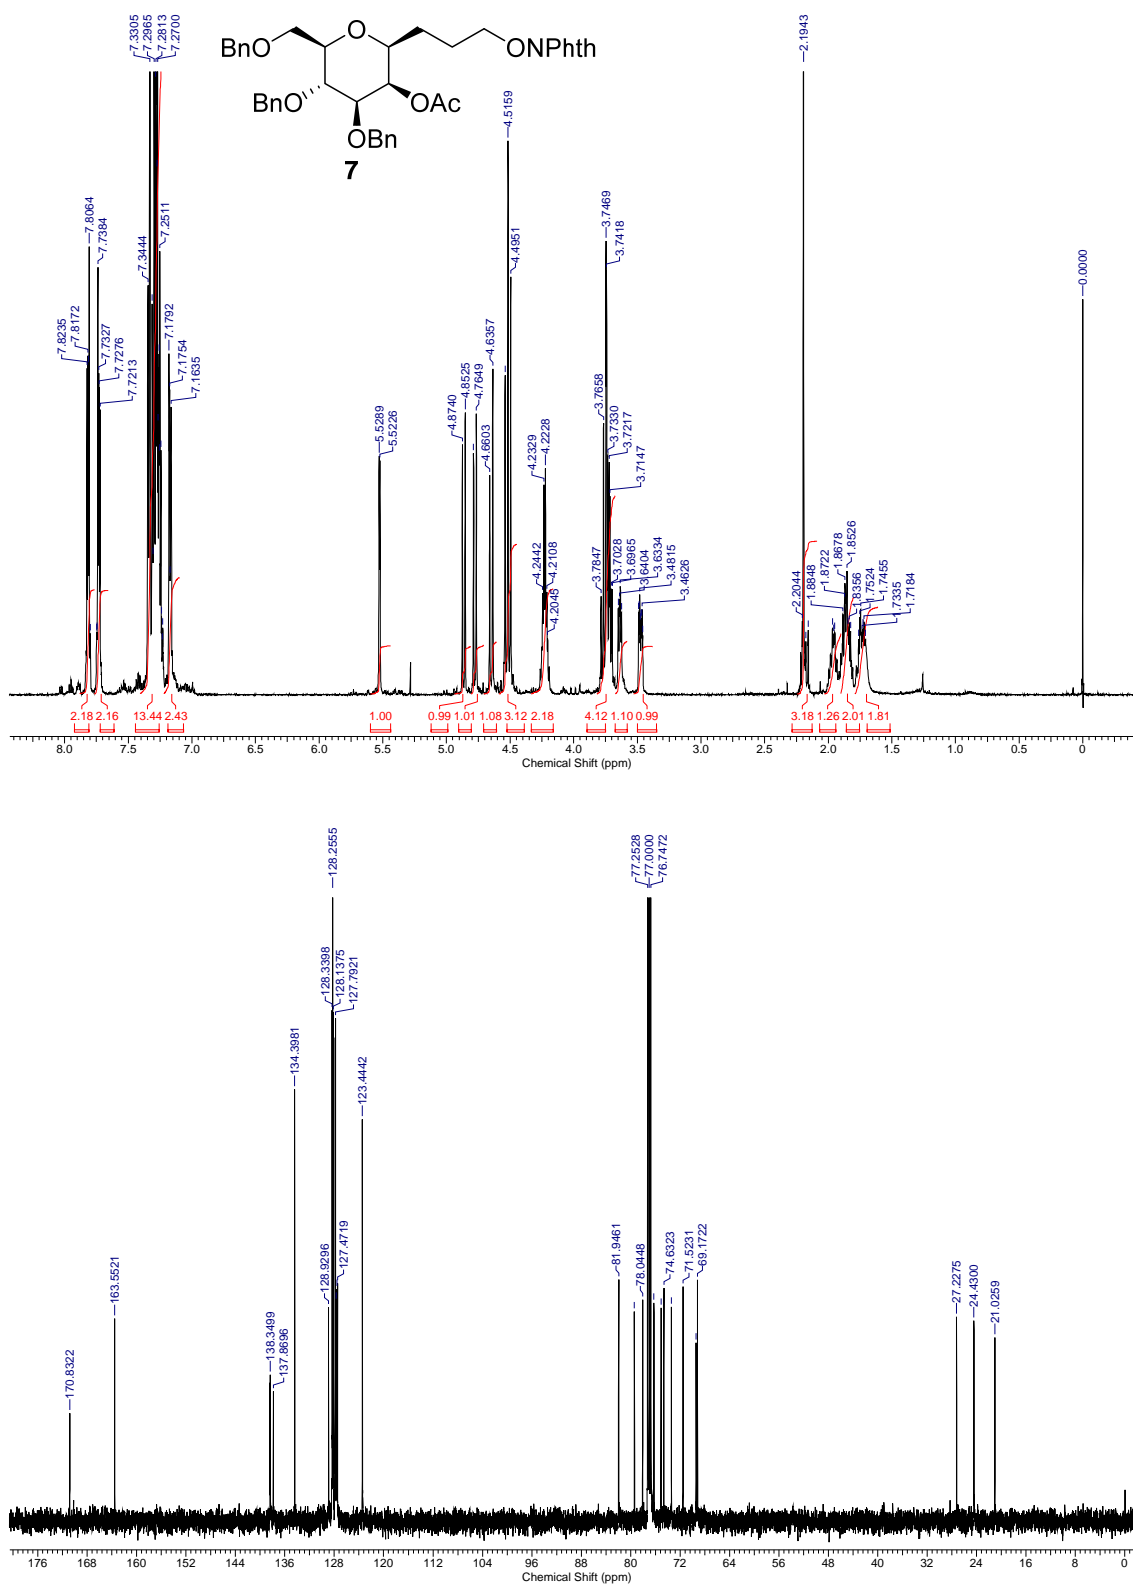

**Fig. S11.** <sup>1</sup>H NMR (500 MHz, CDCl<sub>3</sub>) and <sup>13</sup>C{<sup>1</sup>H} NMR (125.7 MHz, CDCl<sub>3</sub>) of compound **7**.

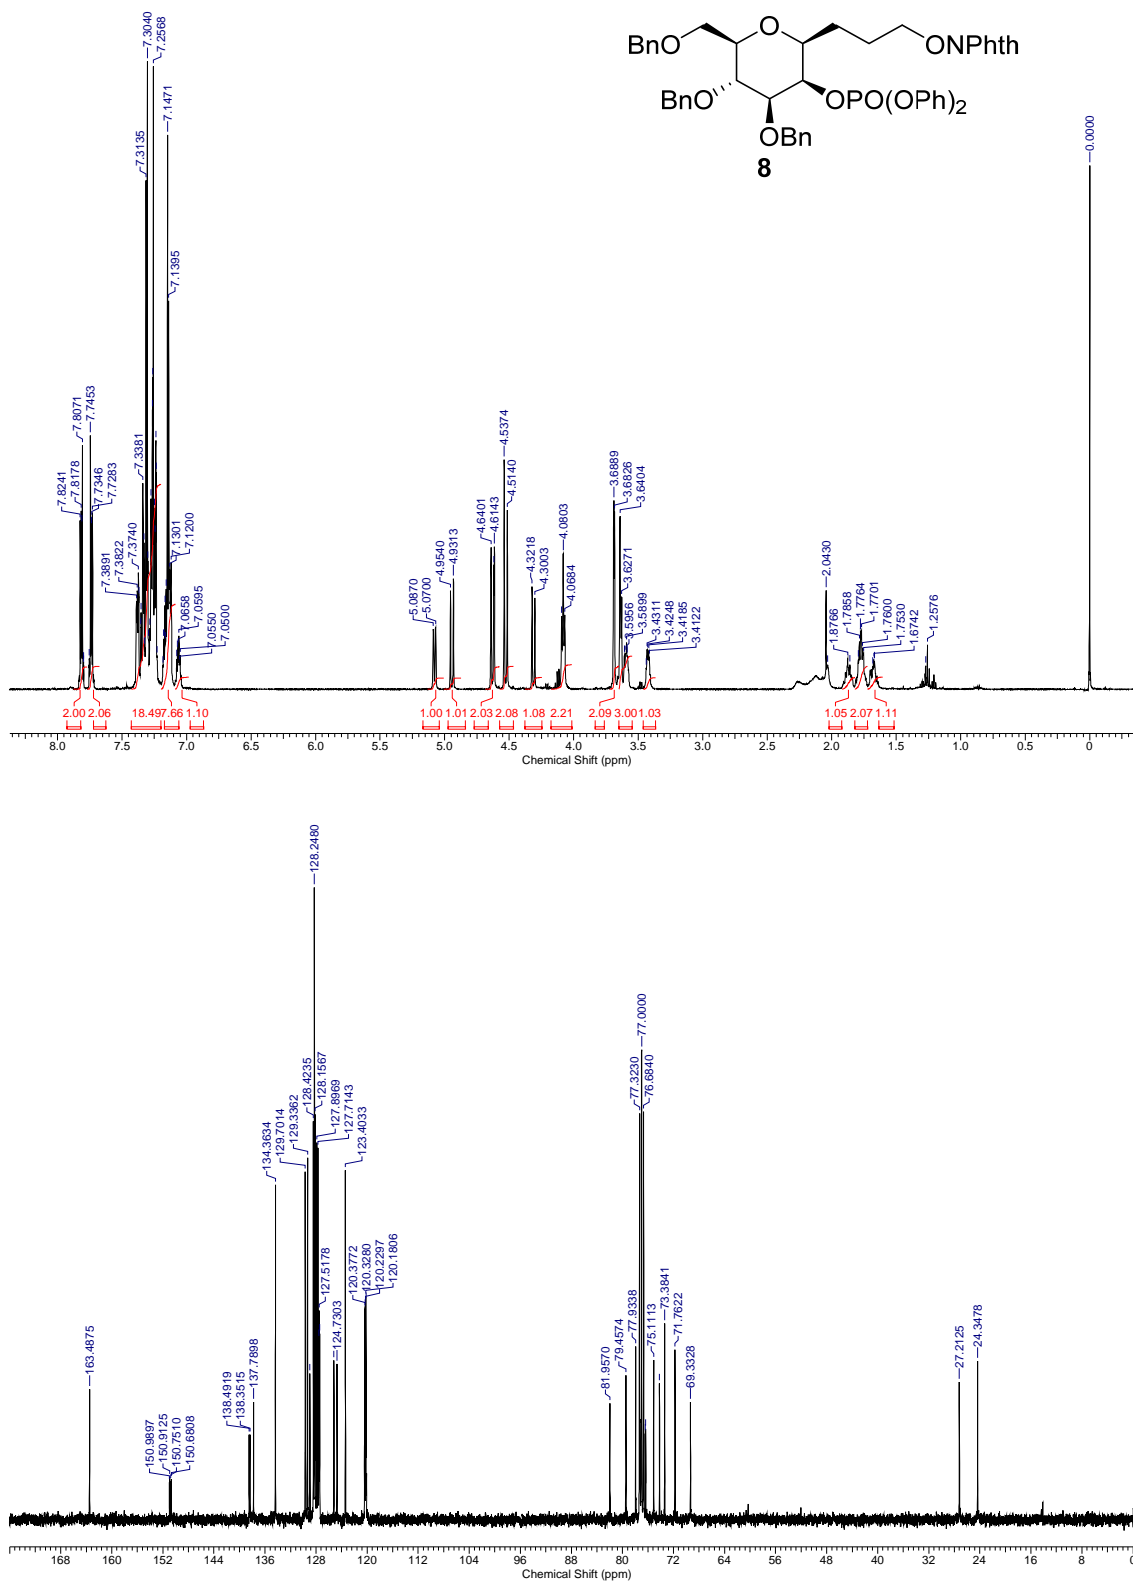

**Fig. S12.** <sup>1</sup>H NMR (500 MHz, CDCl<sub>3</sub>) and <sup>13</sup>C{<sup>1</sup>H} NMR (100.6 MHz, CDCl<sub>3</sub>) of compound **8**.

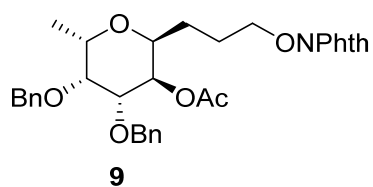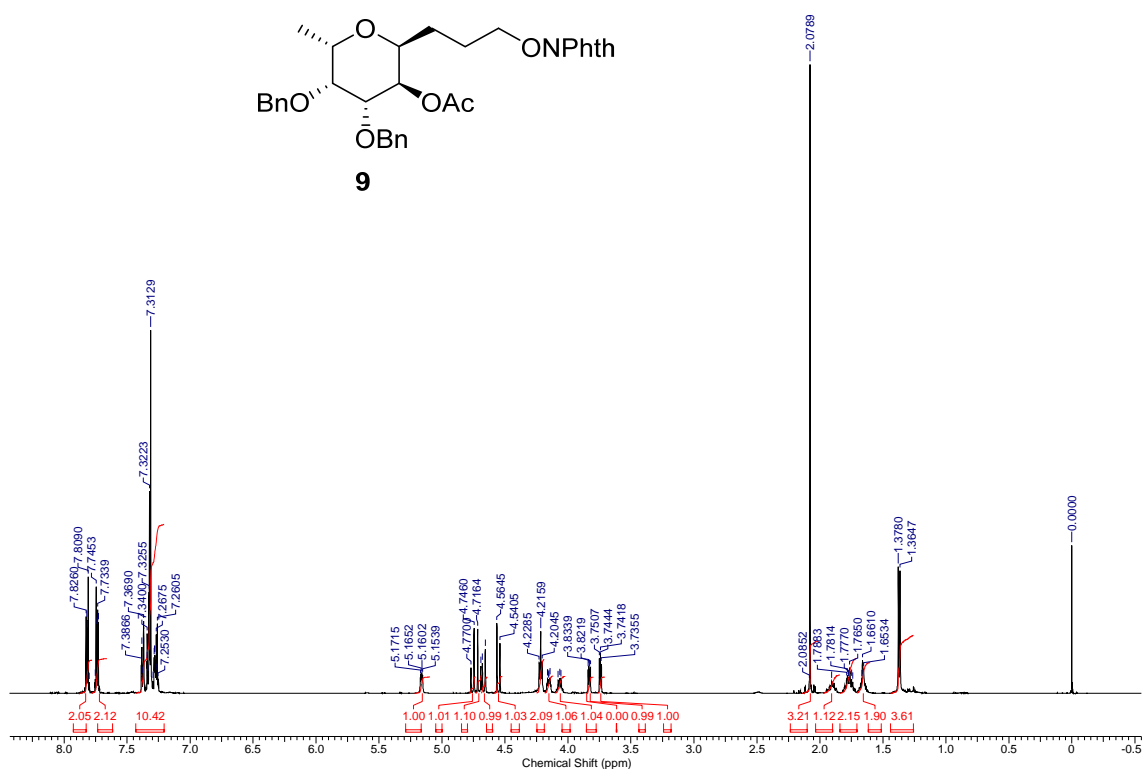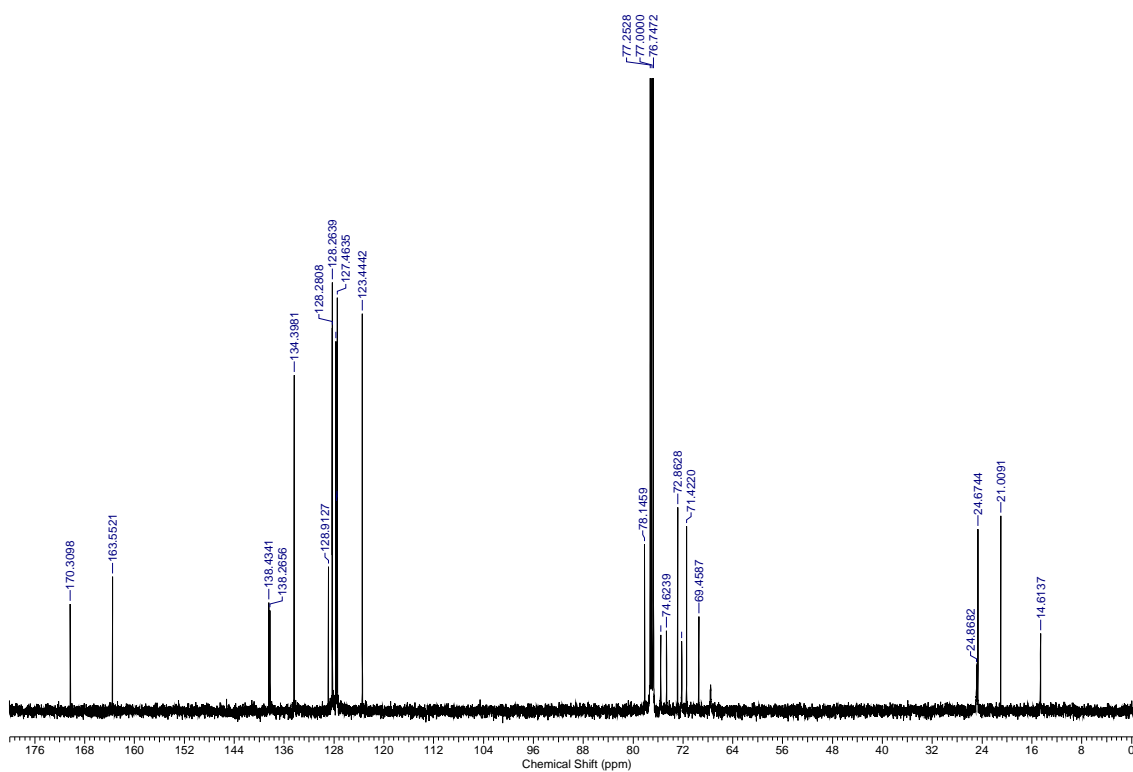

**Fig. S13.** <sup>1</sup>H NMR (500 MHz, CDCl<sub>3</sub>) and <sup>13</sup>C{<sup>1</sup>H} NMR (125.7 MHz, CDCl<sub>3</sub>) of compound **9**.

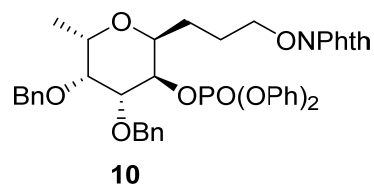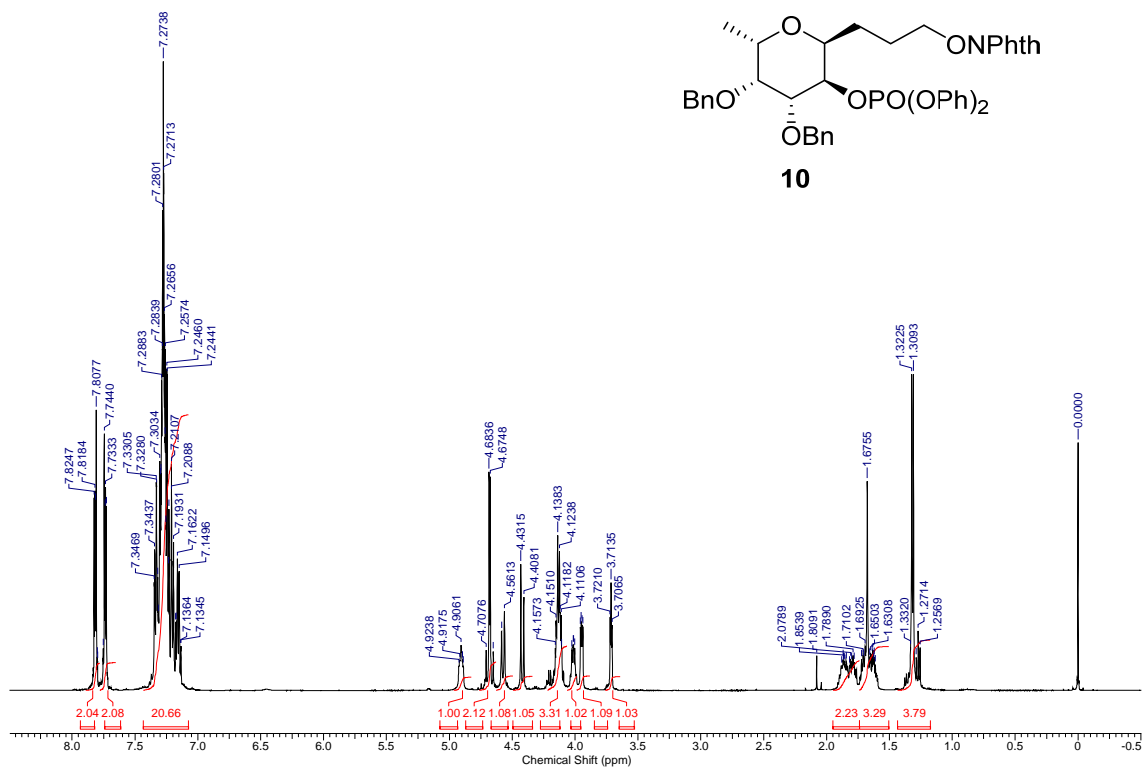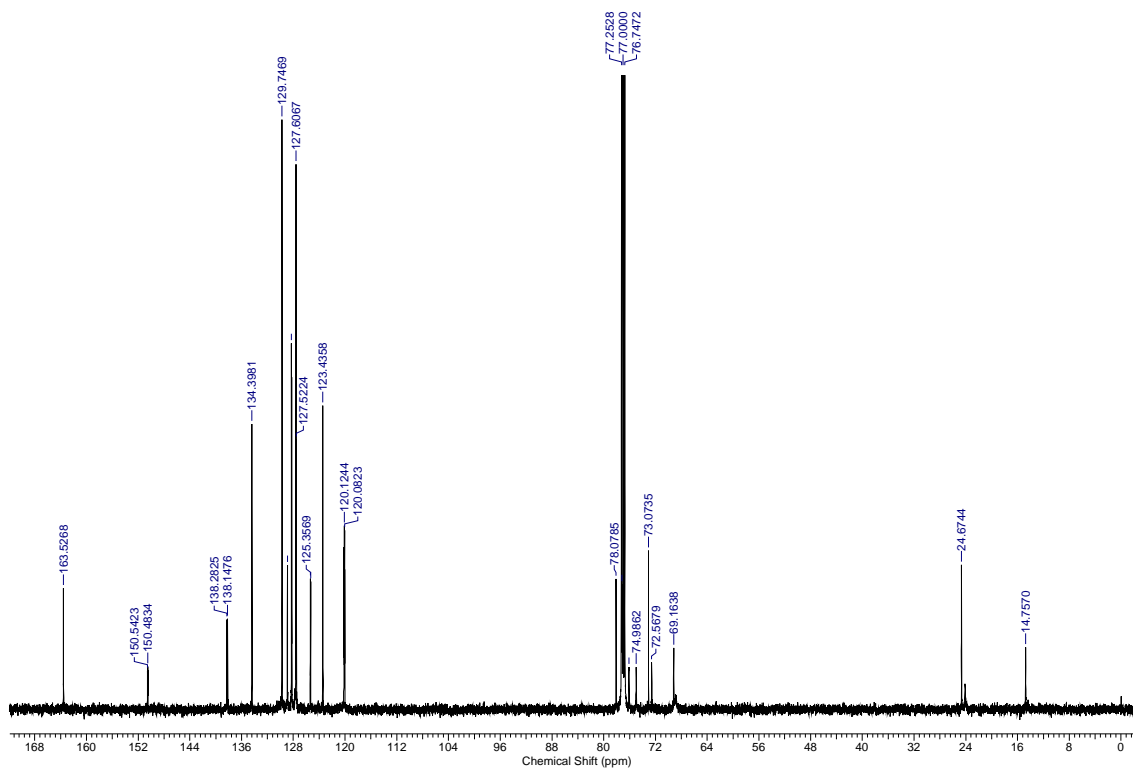

**Fig. S14.** <sup>1</sup>H NMR (500 MHz, CDCl<sub>3</sub>) and <sup>13</sup>C{<sup>1</sup>H} NMR (125.7 MHz, CDCl<sub>3</sub>) of compound **10**.

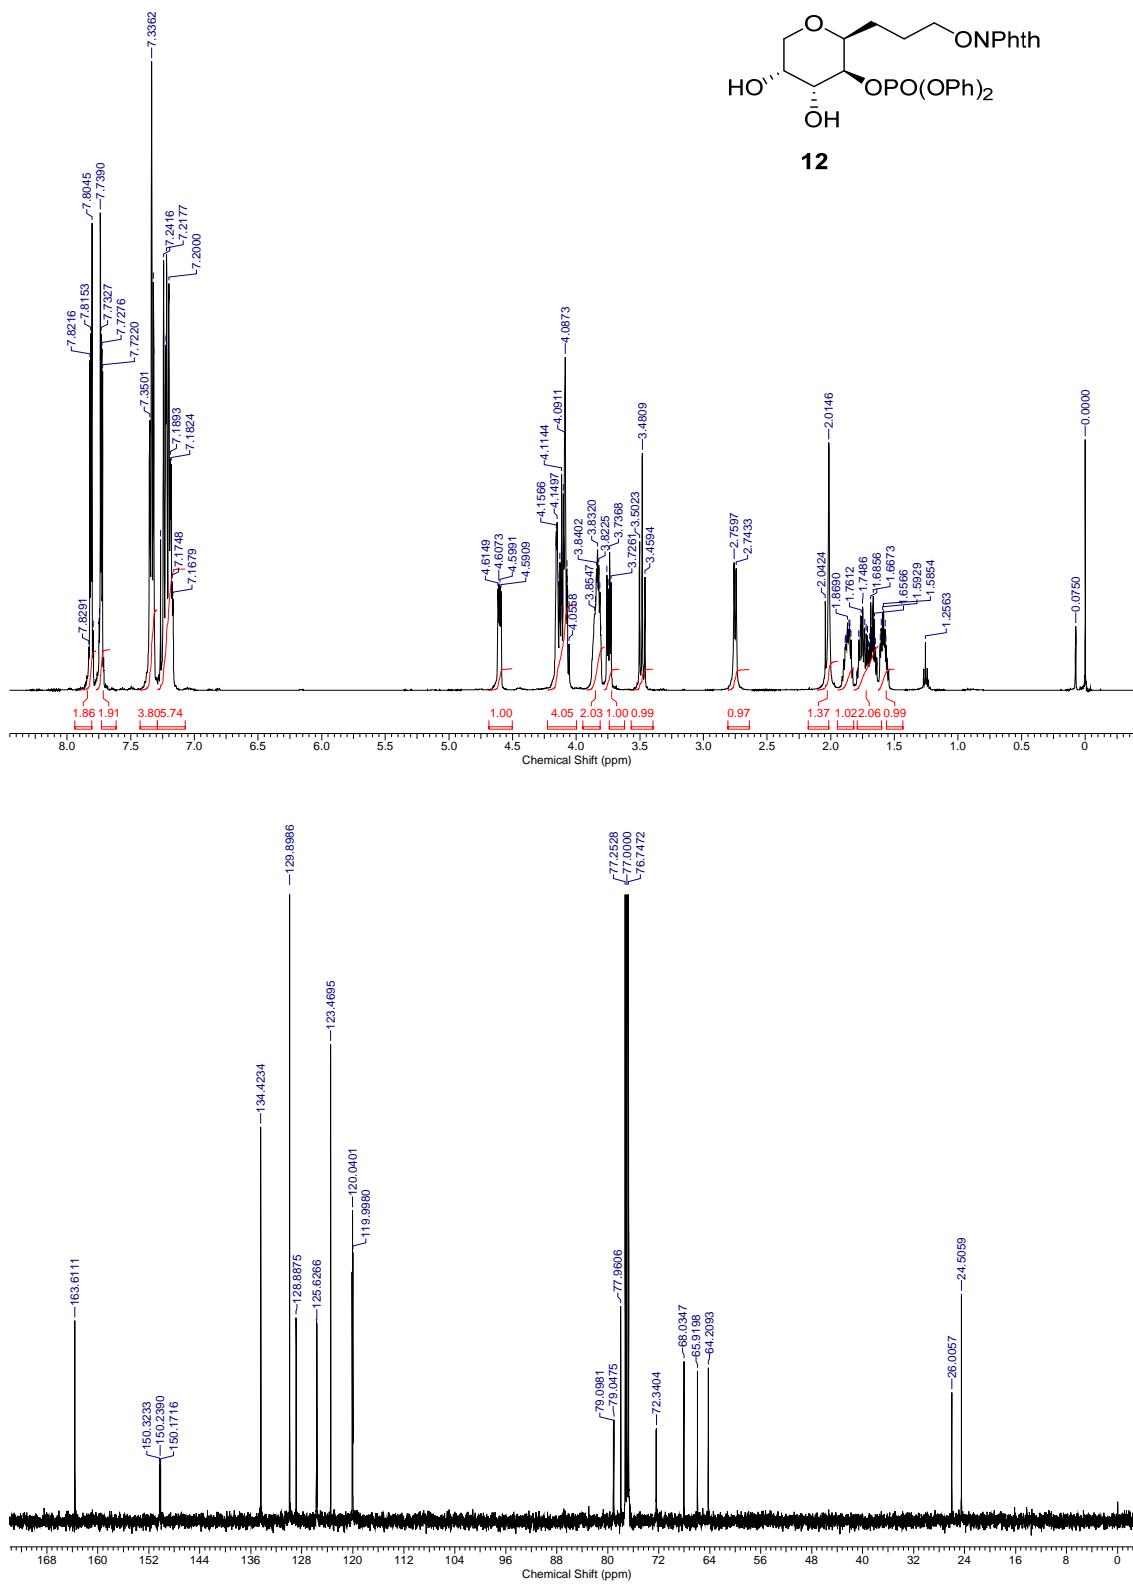

**Fig. S15.** <sup>1</sup>H NMR (500 MHz, CDCl<sub>3</sub>) and <sup>13</sup>C{<sup>1</sup>H} NMR (125.7 MHz, CDCl<sub>3</sub>) of compound **12**.

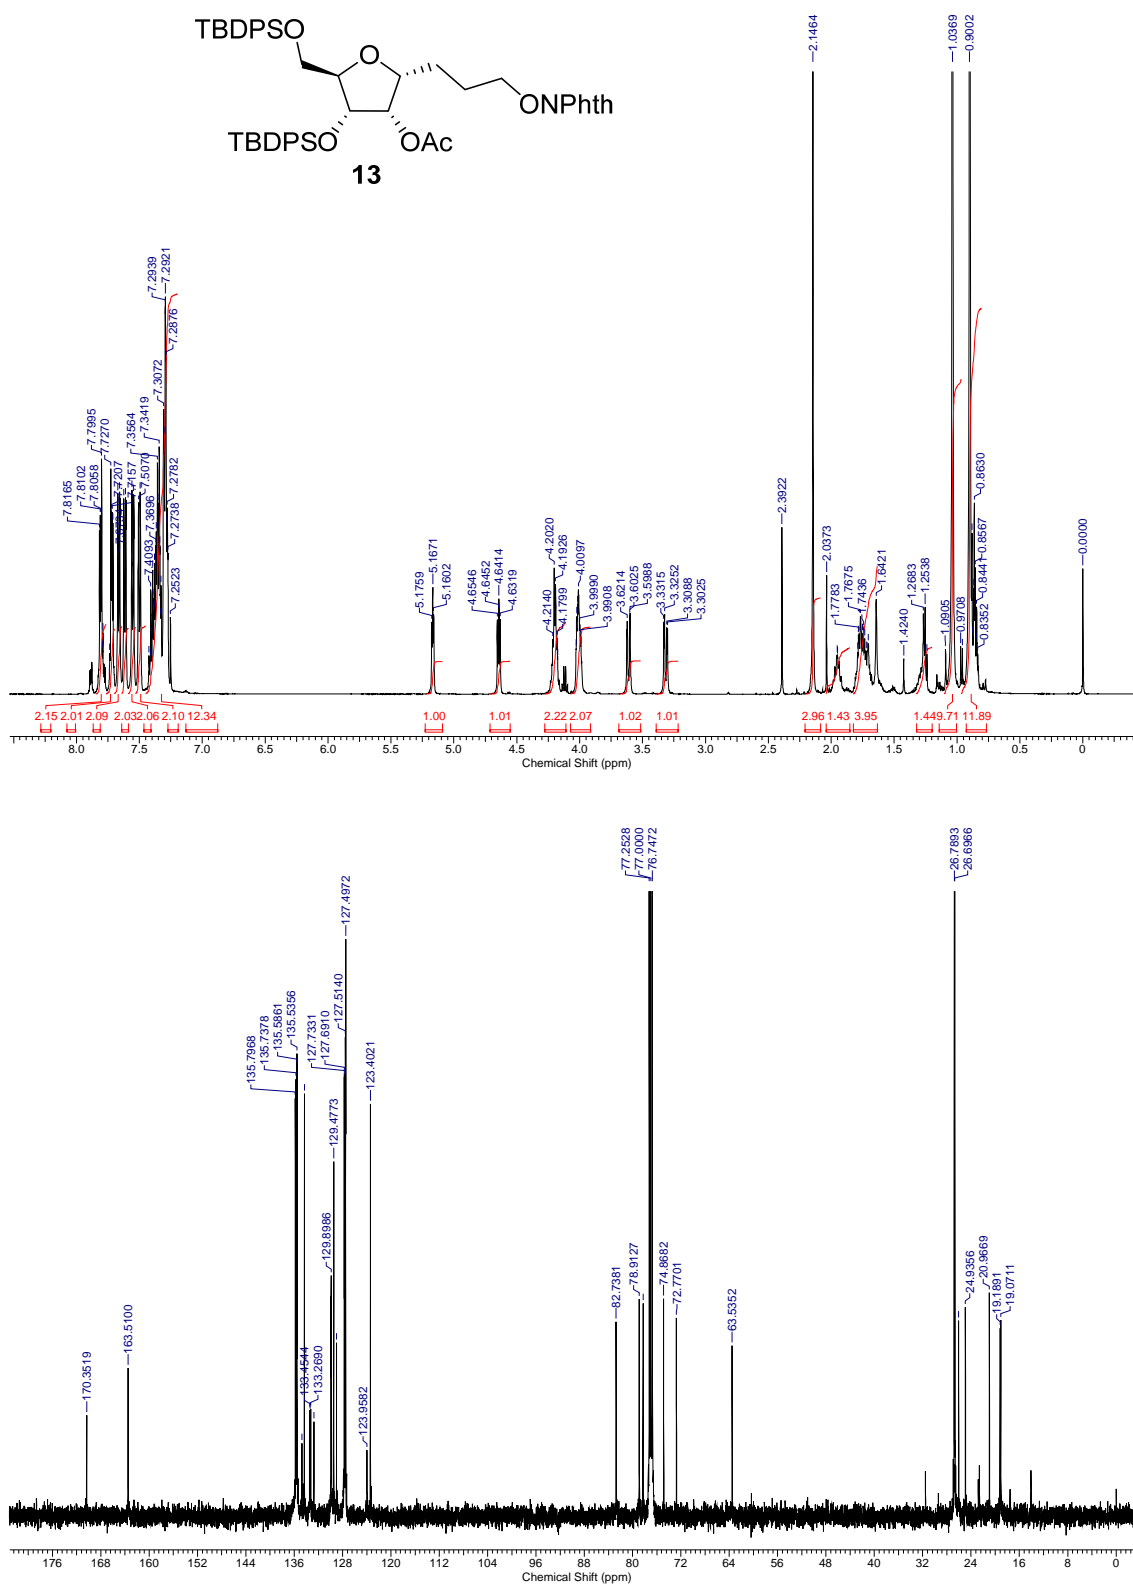

**Fig. S16.** <sup>1</sup>H NMR (500 MHz, CDCl<sub>3</sub>) and <sup>13</sup>C{<sup>1</sup>H} NMR (125.7 MHz, CDCl<sub>3</sub>) of compound **13**.

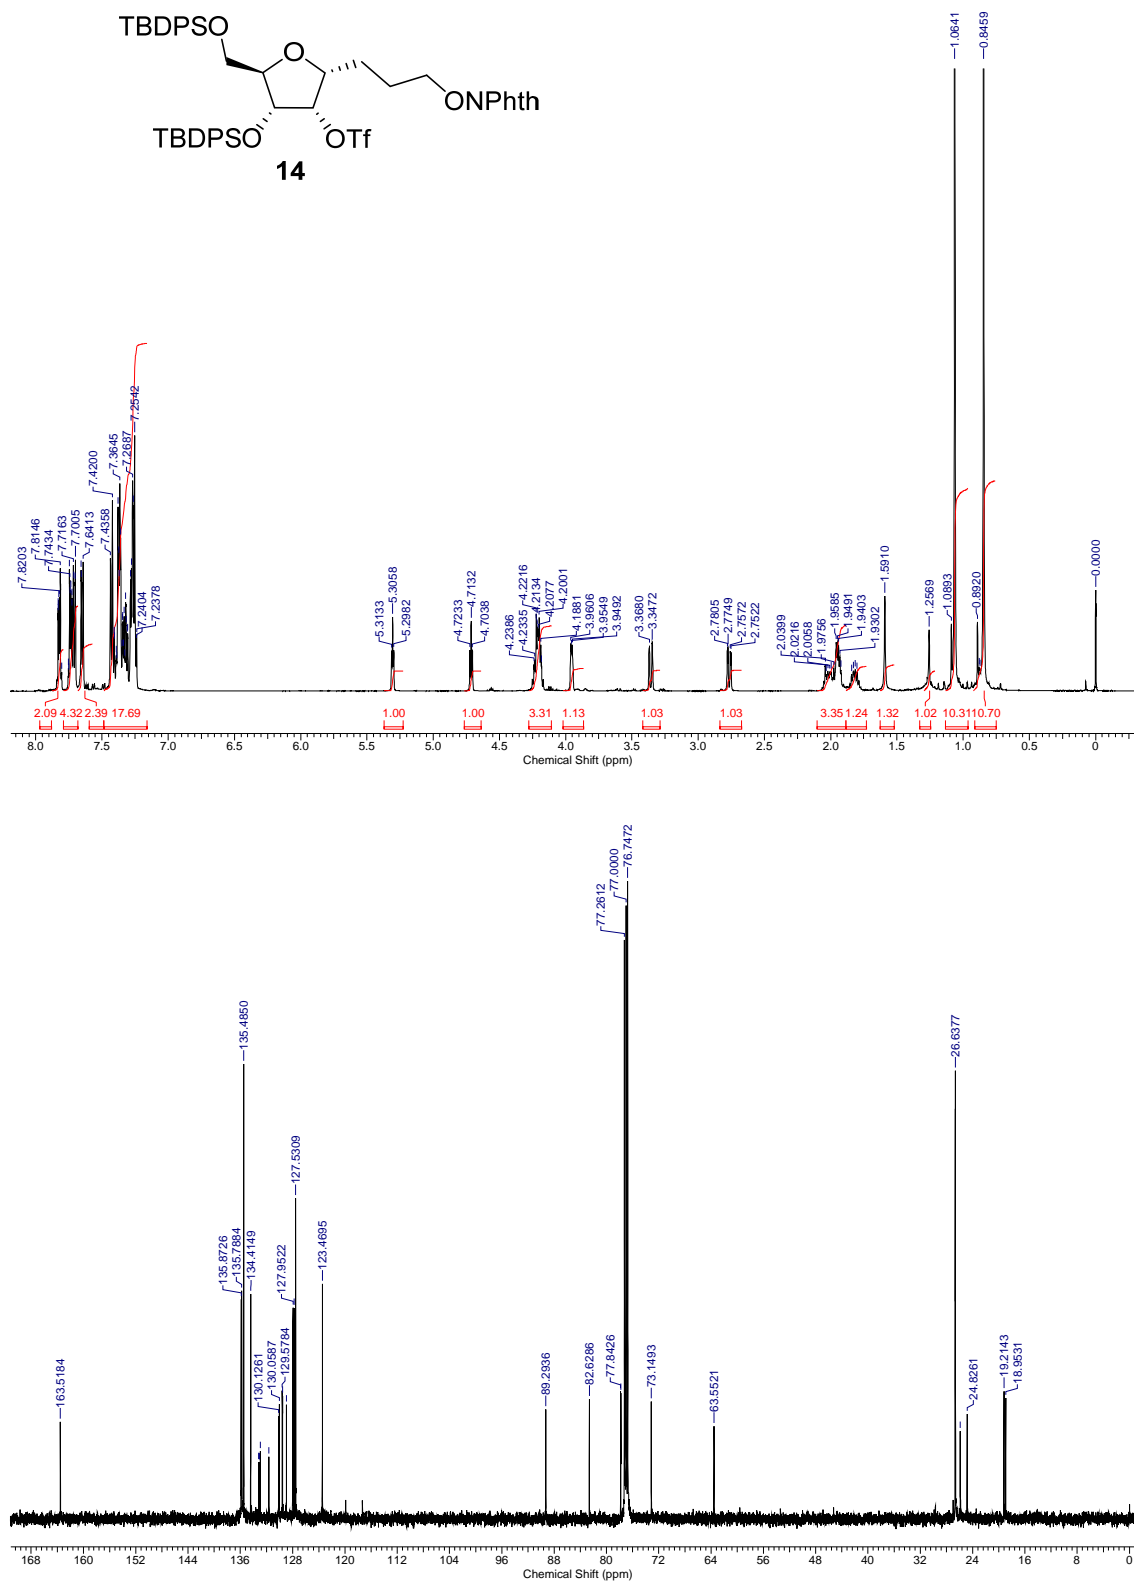

**Fig. S17.** <sup>1</sup>H NMR (500 MHz, CDCl<sub>3</sub>) and <sup>13</sup>C{<sup>1</sup>H} NMR (125.7 MHz, CDCl<sub>3</sub>) of compound **14**.

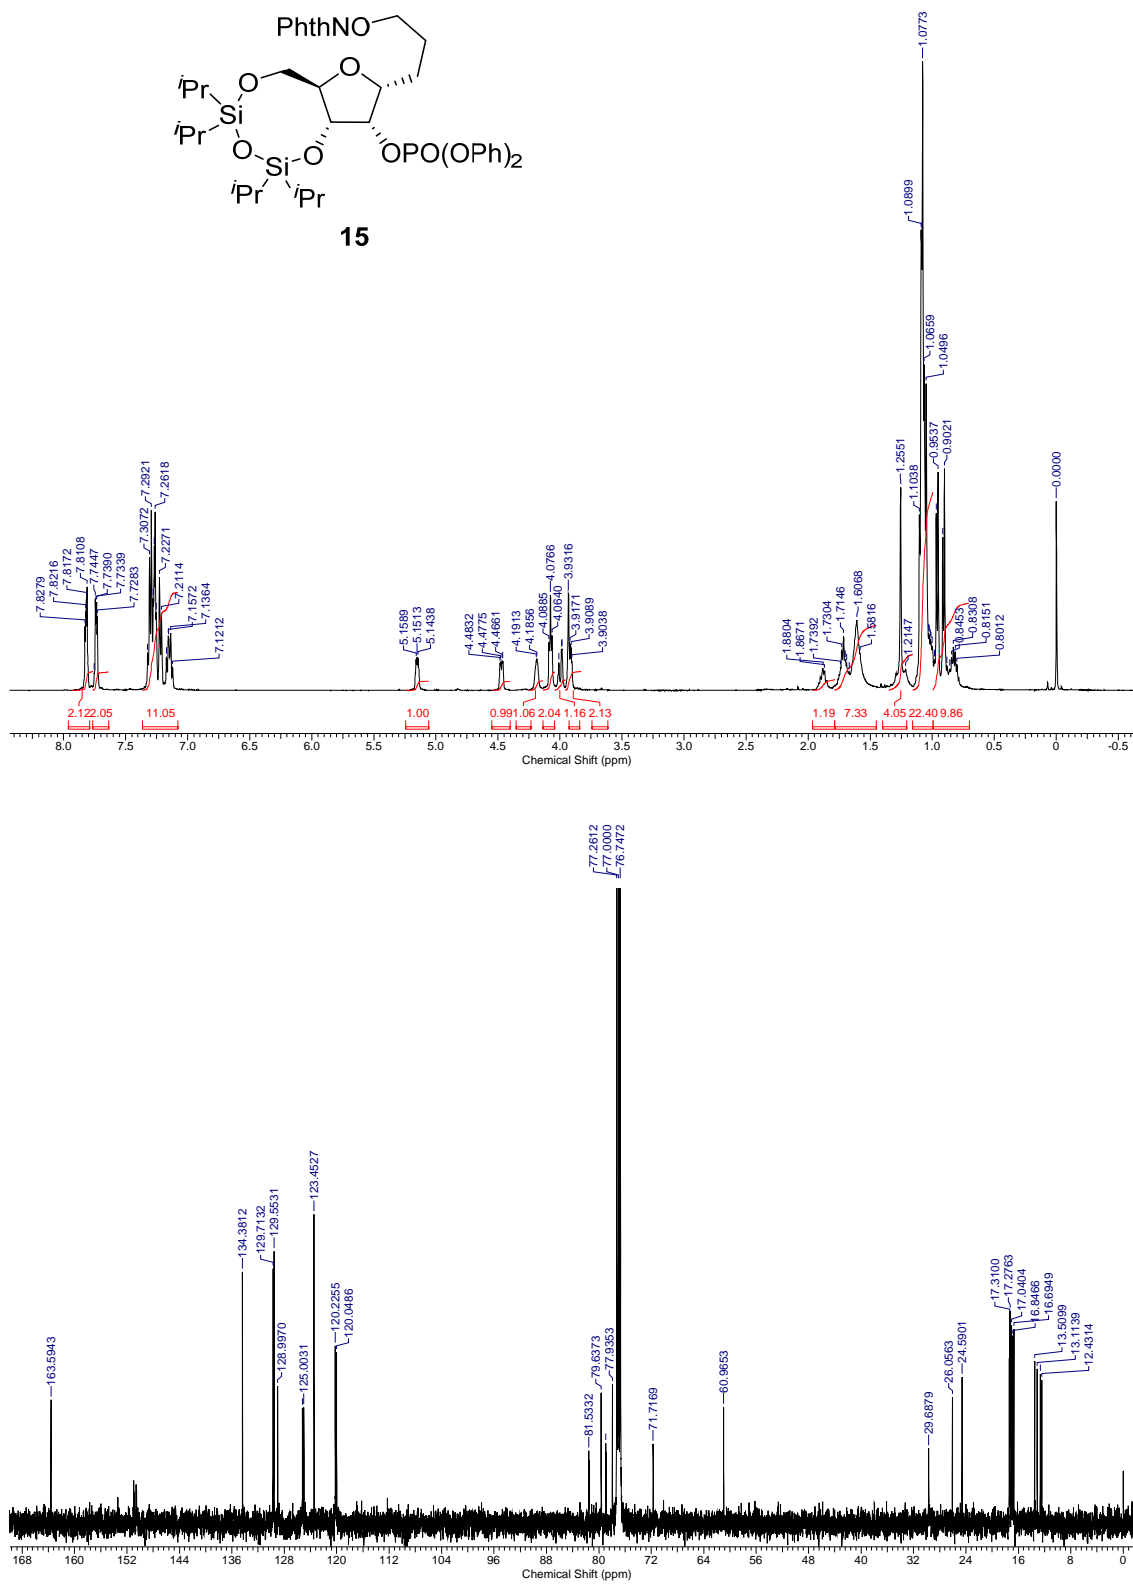

**Fig. S18.** <sup>1</sup>H NMR (500 MHz, CDCl<sub>3</sub>) and <sup>13</sup>C{H} NMR (125.7 MHz, CDCl<sub>3</sub>) of compound **15**.



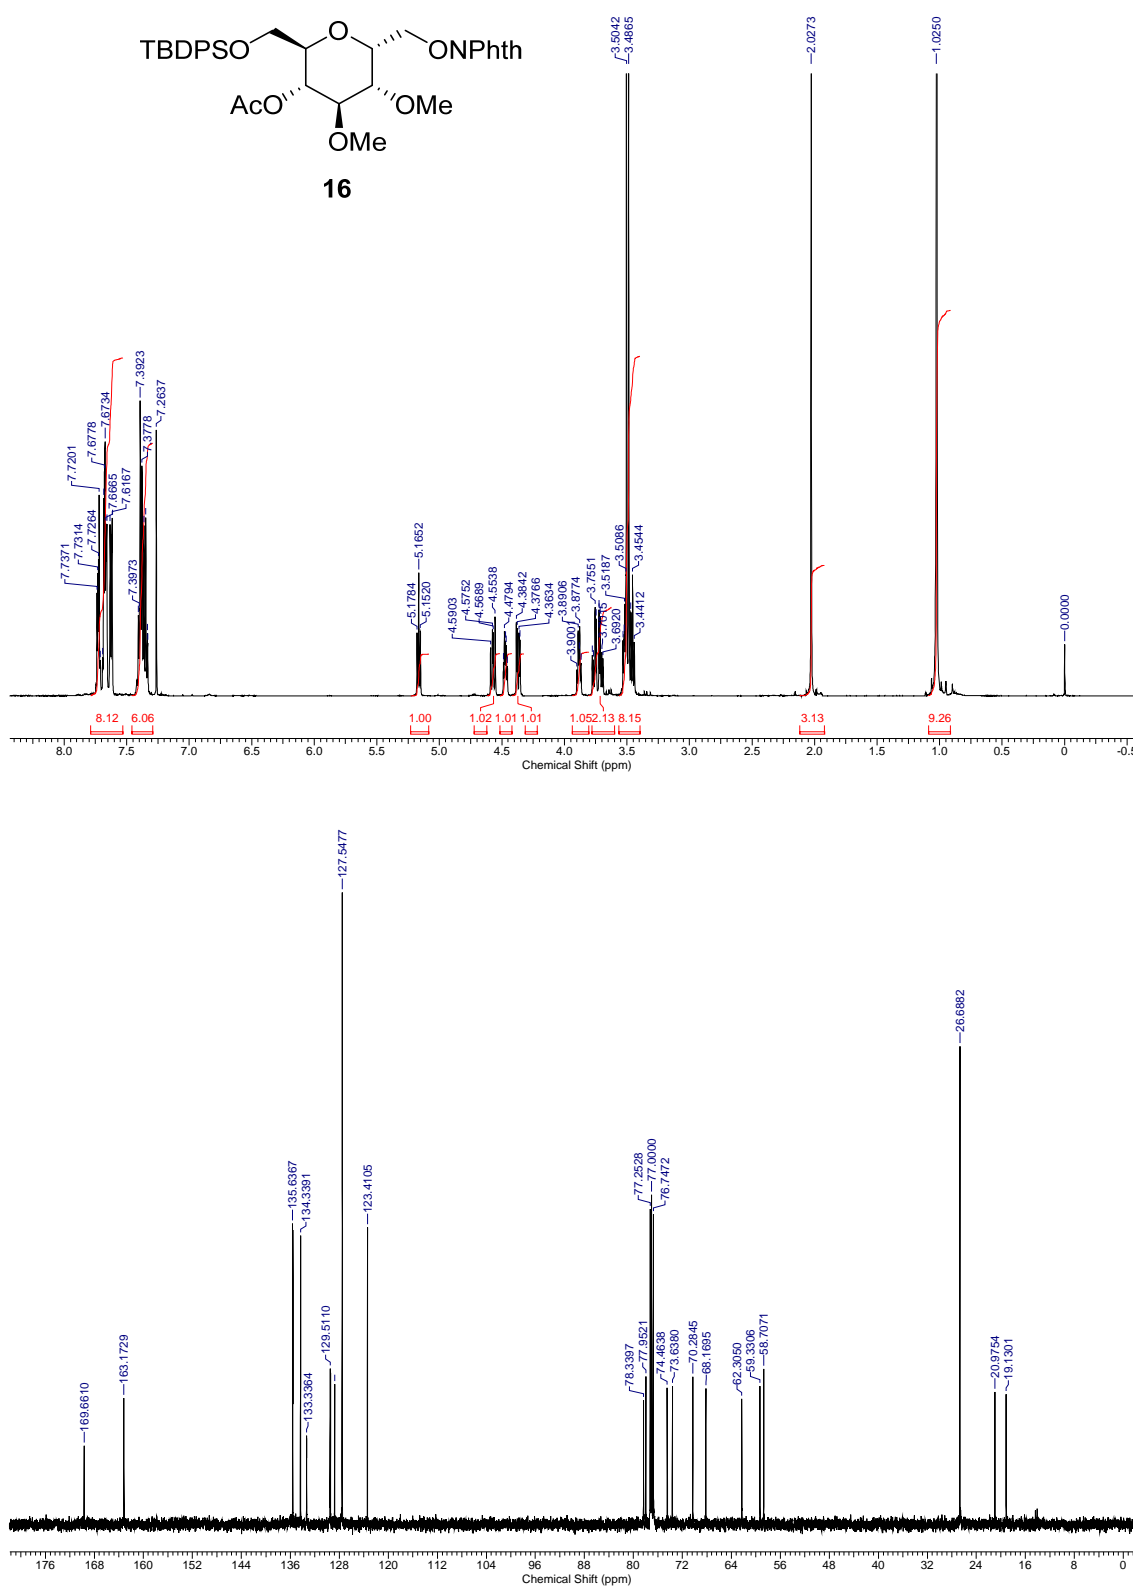

**Fig. S19.** <sup>1</sup>H NMR (500 MHz, CDCl<sub>3</sub>) and <sup>13</sup>C{<sup>1</sup>H} NMR (125.7 MHz, CDCl<sub>3</sub>) of compound **16**.

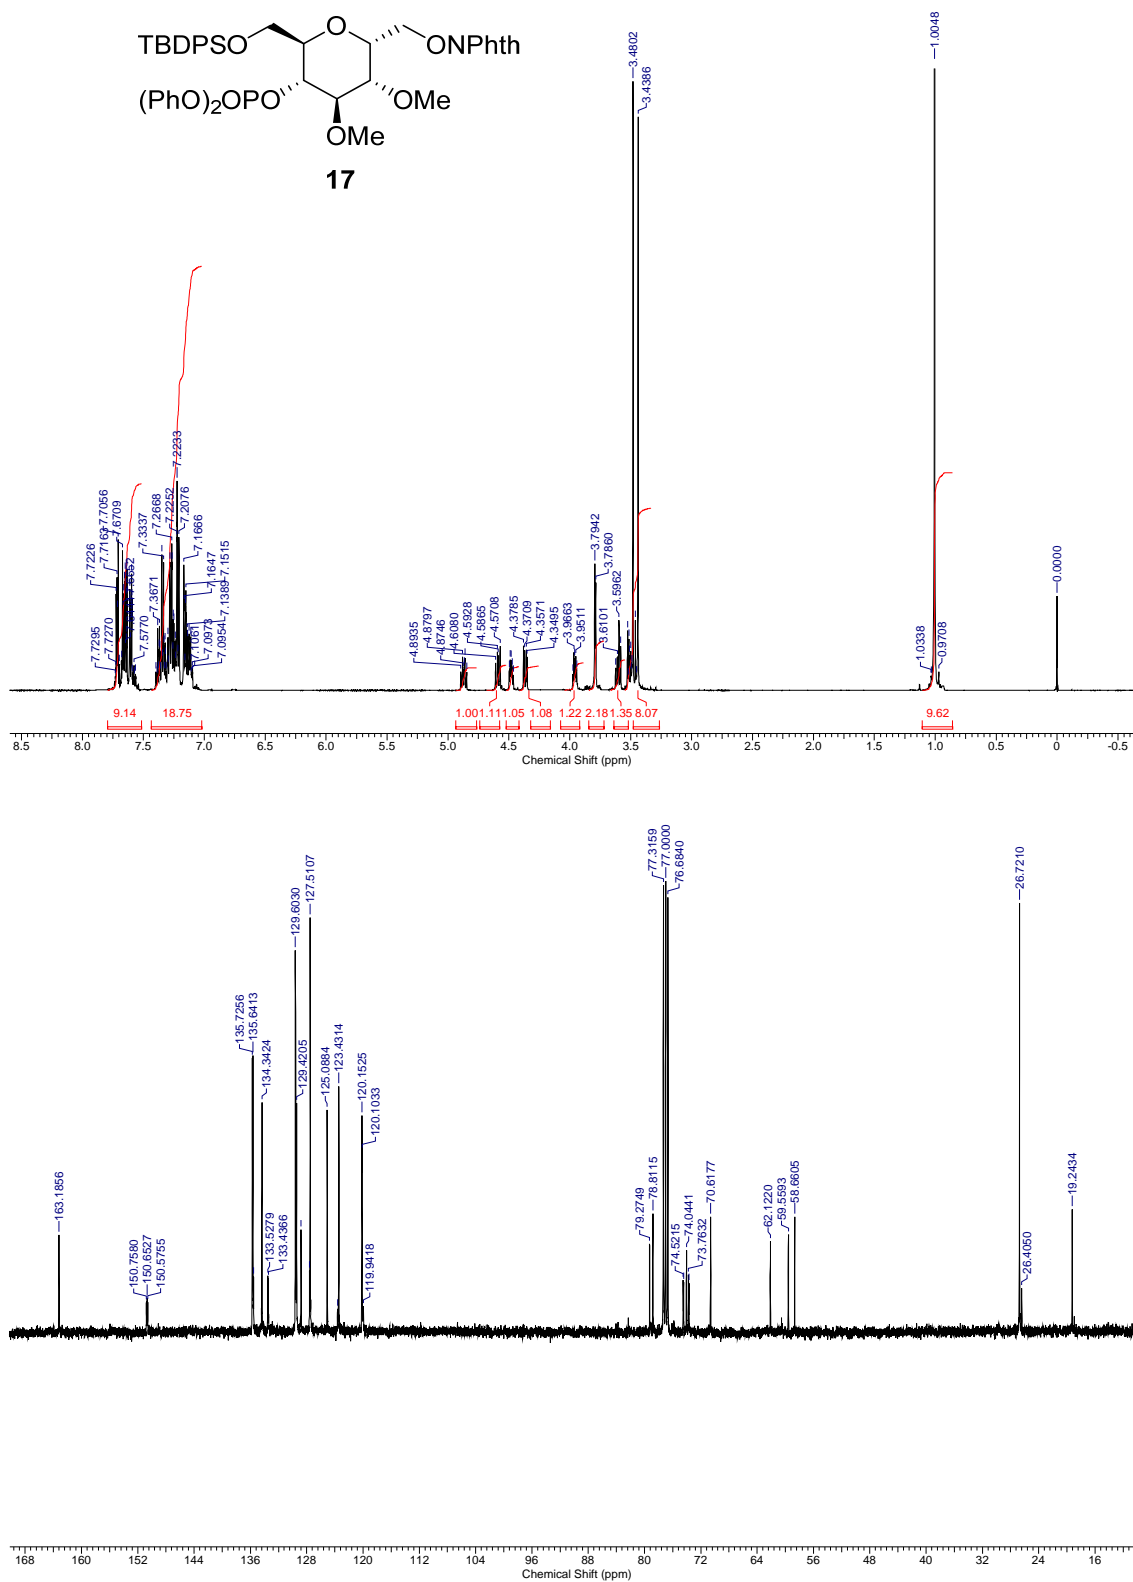

**Fig. S20.** <sup>1</sup>H NMR (500 MHz, CDCl<sub>3</sub>) and <sup>13</sup>C{<sup>1</sup>H} NMR (100.6 MHz, CDCl<sub>3</sub>) of compound **17**.

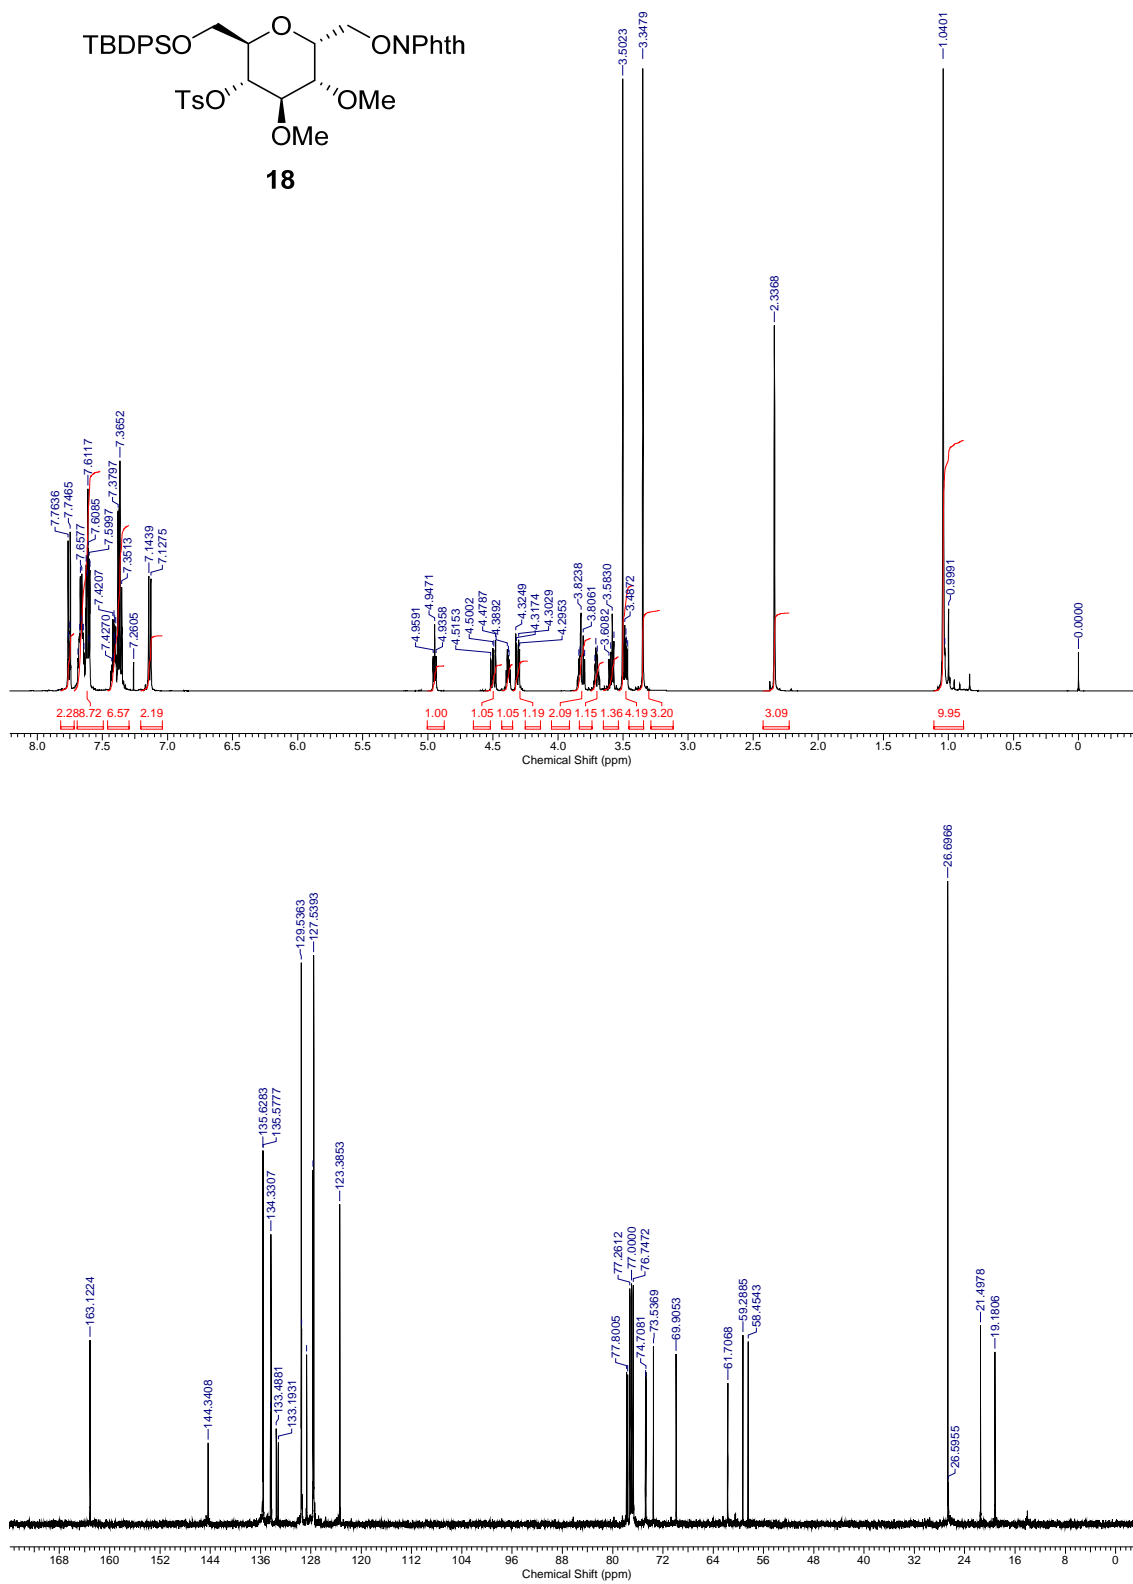

**Fig. S21.** <sup>1</sup>H NMR (500 MHz, CDCl<sub>3</sub>) and <sup>13</sup>C{<sup>1</sup>H} NMR (125.7 MHz, CDCl<sub>3</sub>) of compound **18**.

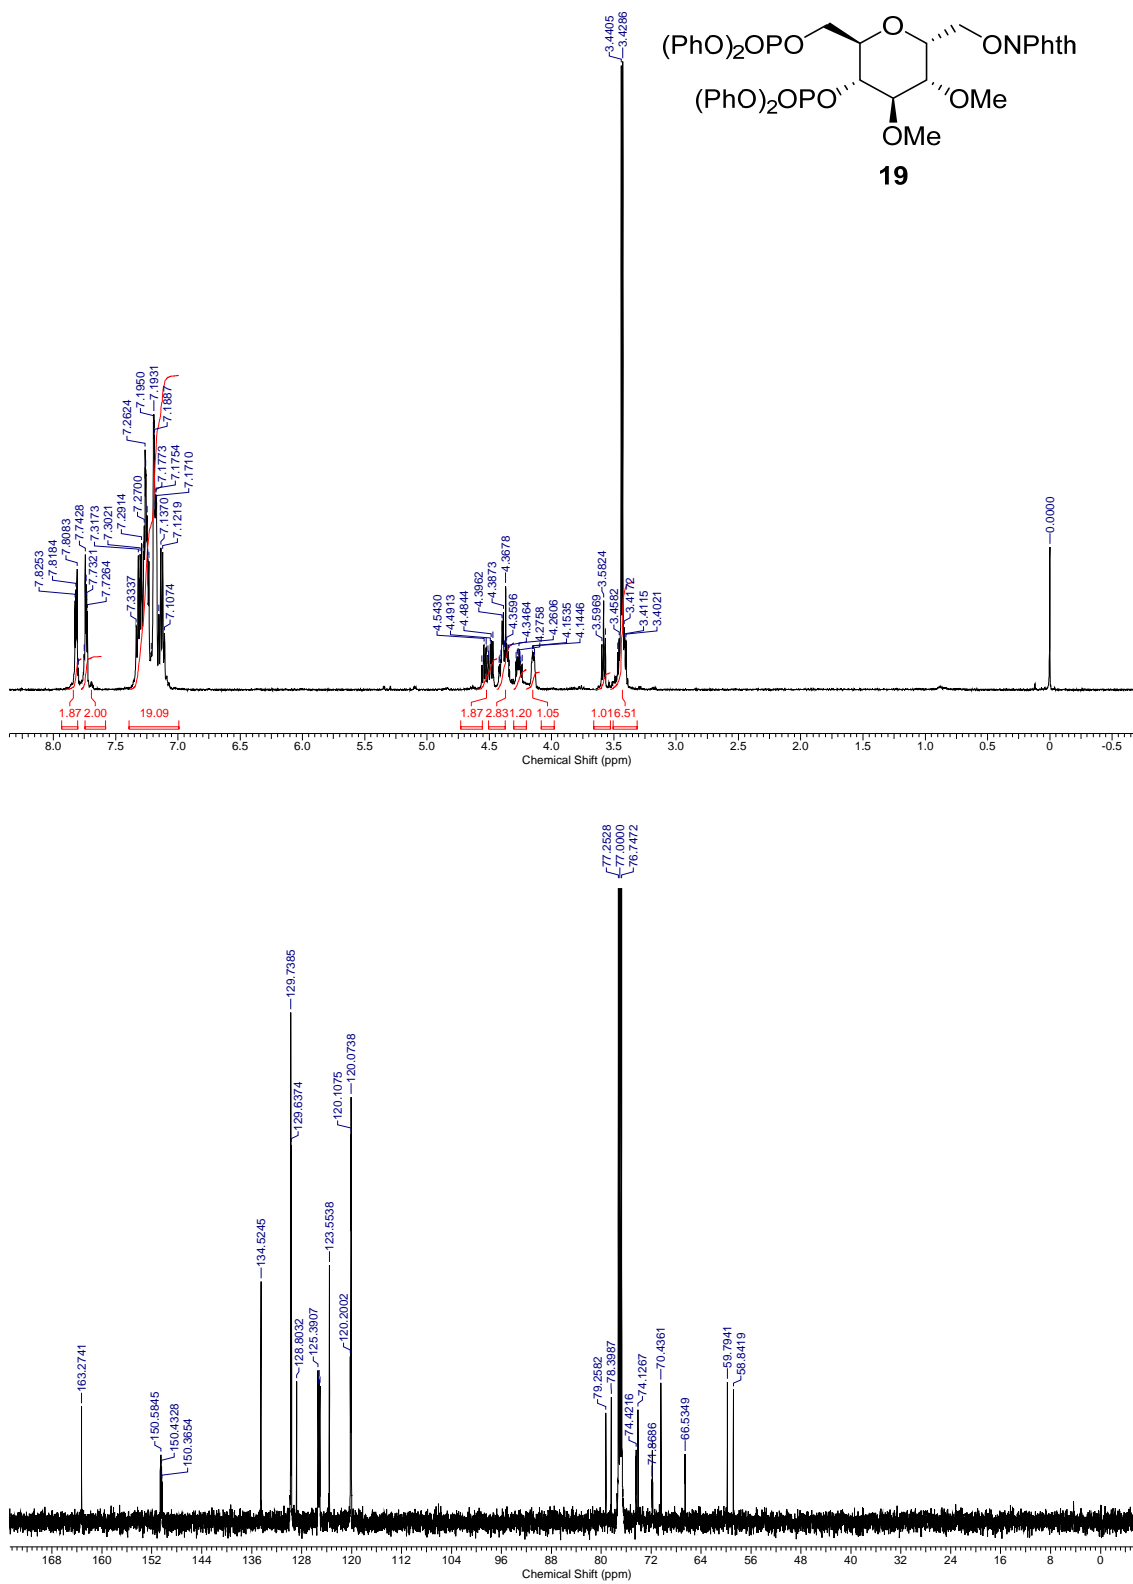

**Fig. S22.** <sup>1</sup>H NMR (500 MHz, CDCl<sub>3</sub>) and <sup>13</sup>C{<sup>1</sup>H} NMR (125.7 MHz, CDCl<sub>3</sub>) of compound **19**.

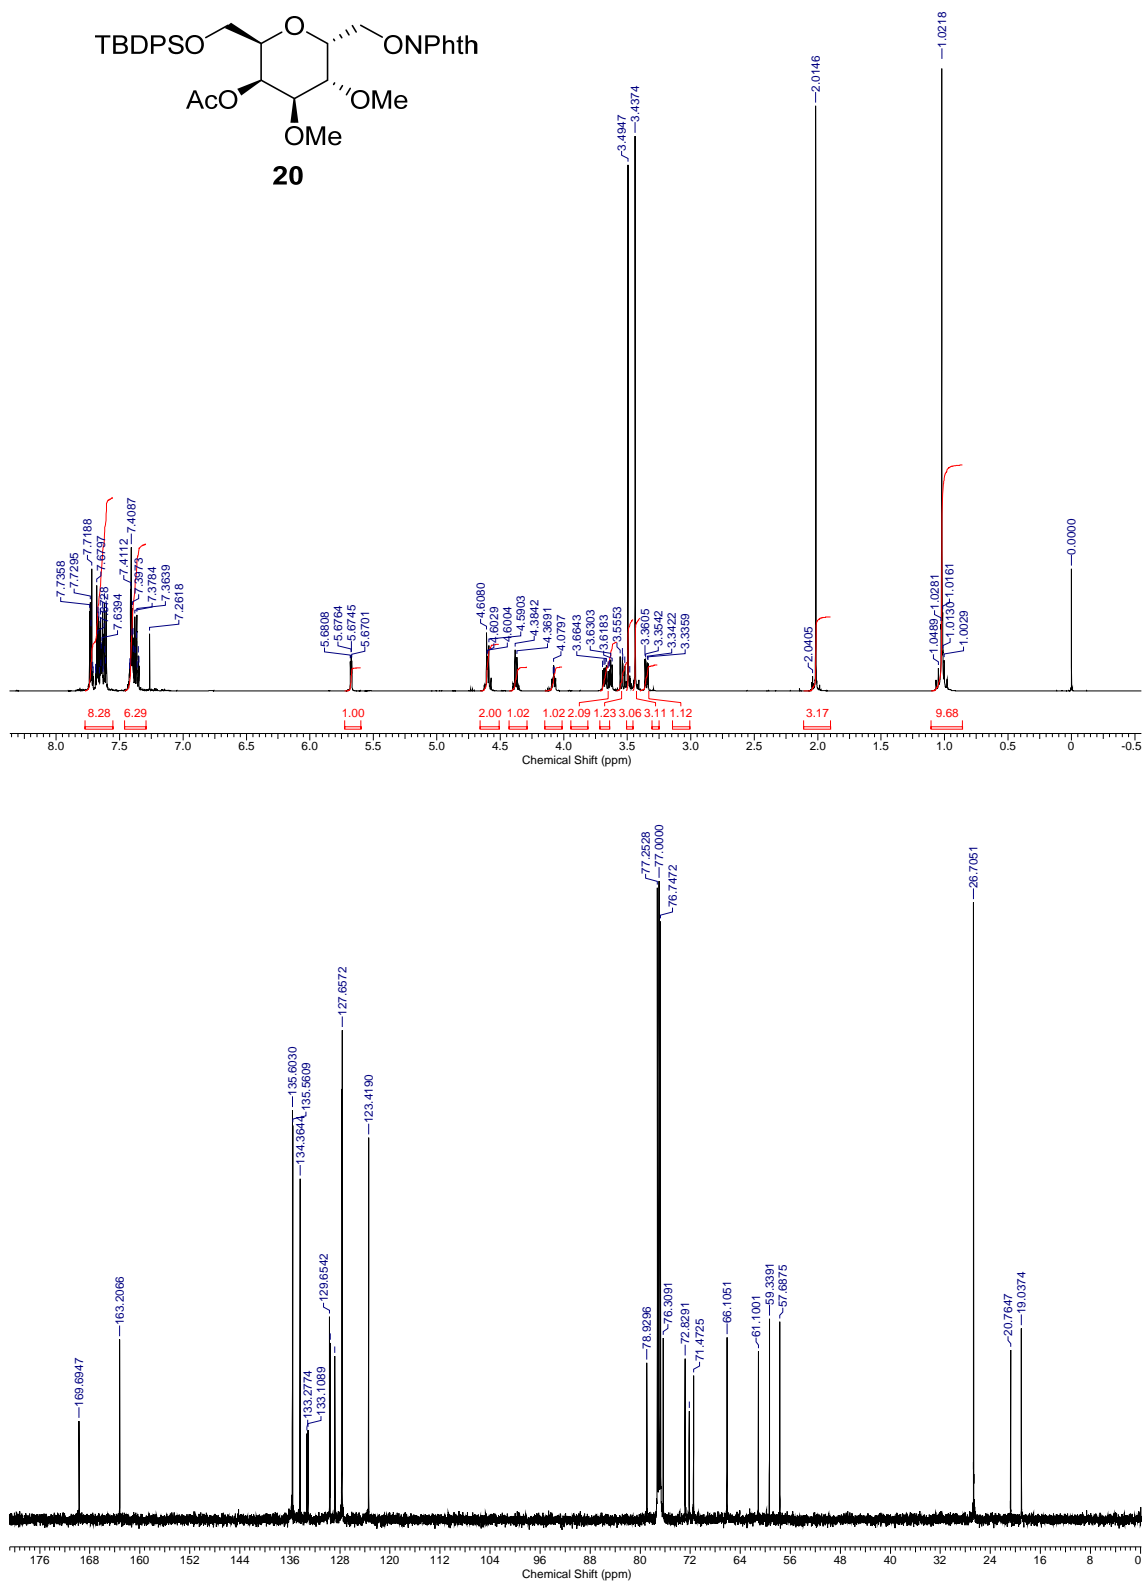

**Fig. S23.** <sup>1</sup>H NMR (500 MHz, CDCl<sub>3</sub>) and <sup>13</sup>C{<sup>1</sup>H} NMR (125.7 MHz, CDCl<sub>3</sub>) of compound **20**.

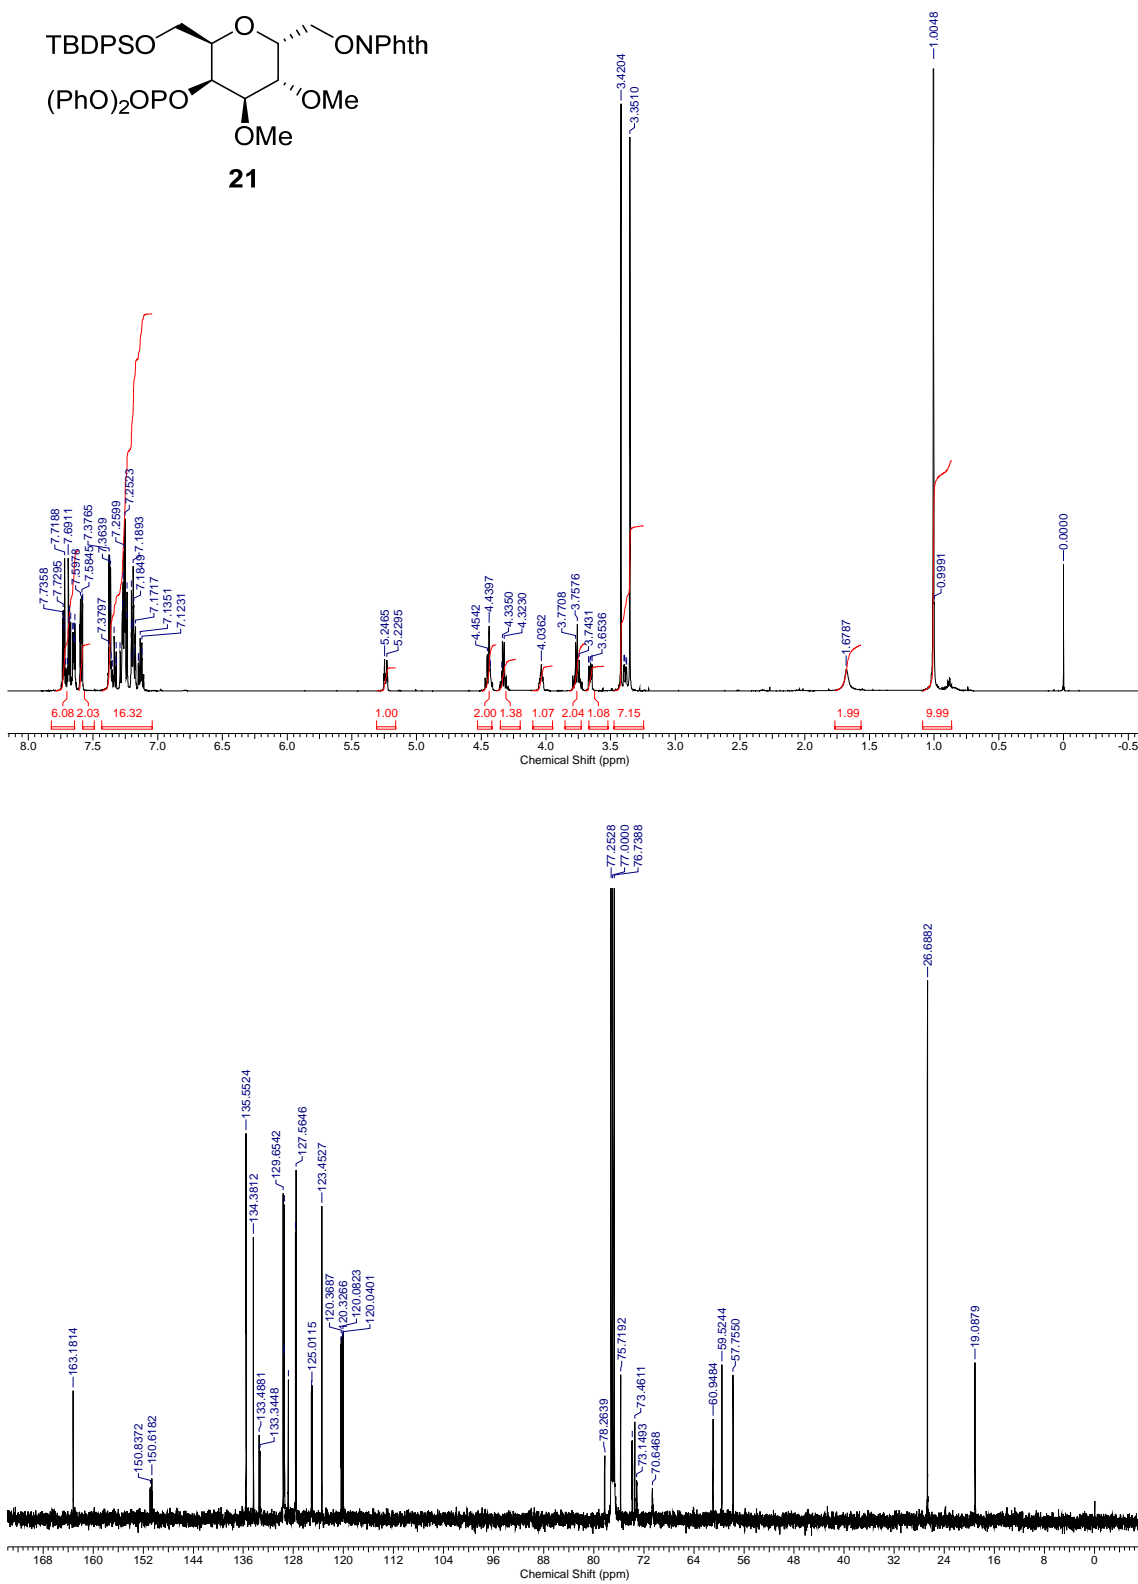

Fig. S24. <sup>1</sup>H NMR (500 MHz, CDCl<sub>3</sub>) and <sup>13</sup>C{H} NMR (125.7 MHz, CDCl<sub>3</sub>) of compound 21.

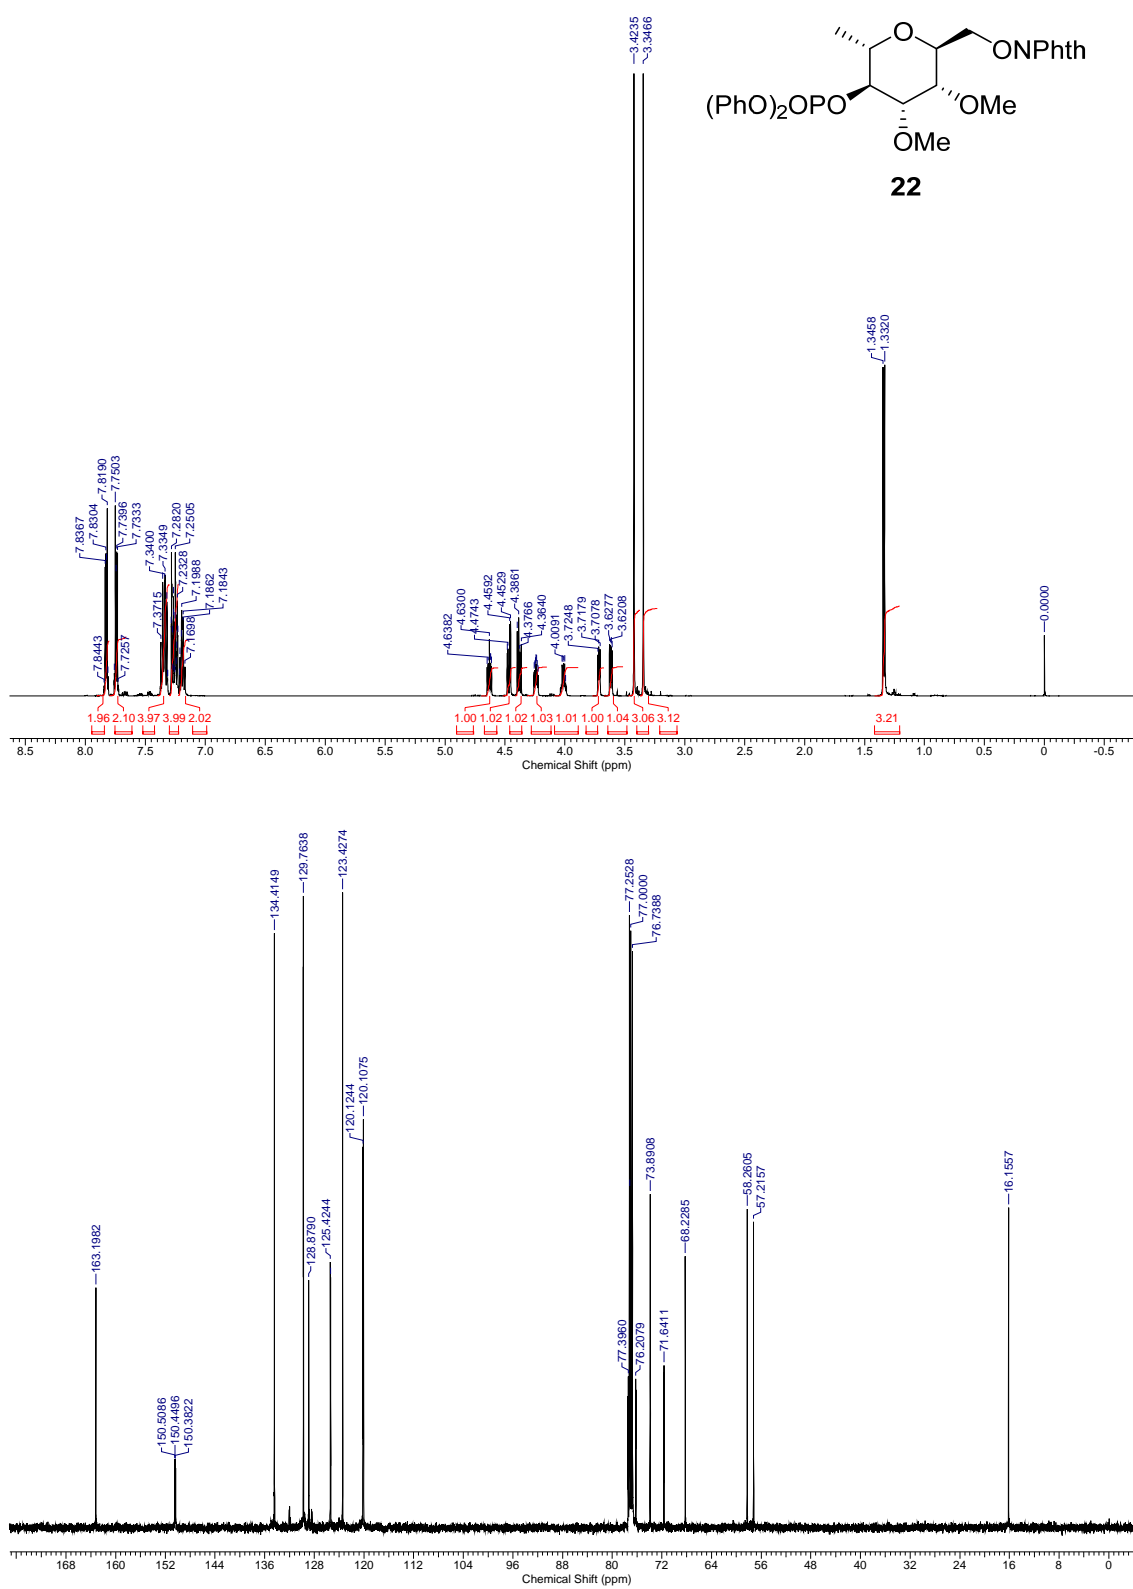

**Fig. S25.** <sup>1</sup>H NMR (500 MHz, CDCl<sub>3</sub>) and <sup>13</sup>C{<sup>1</sup>H} NMR (125.7 MHz, CDCl<sub>3</sub>) of compound **22**.

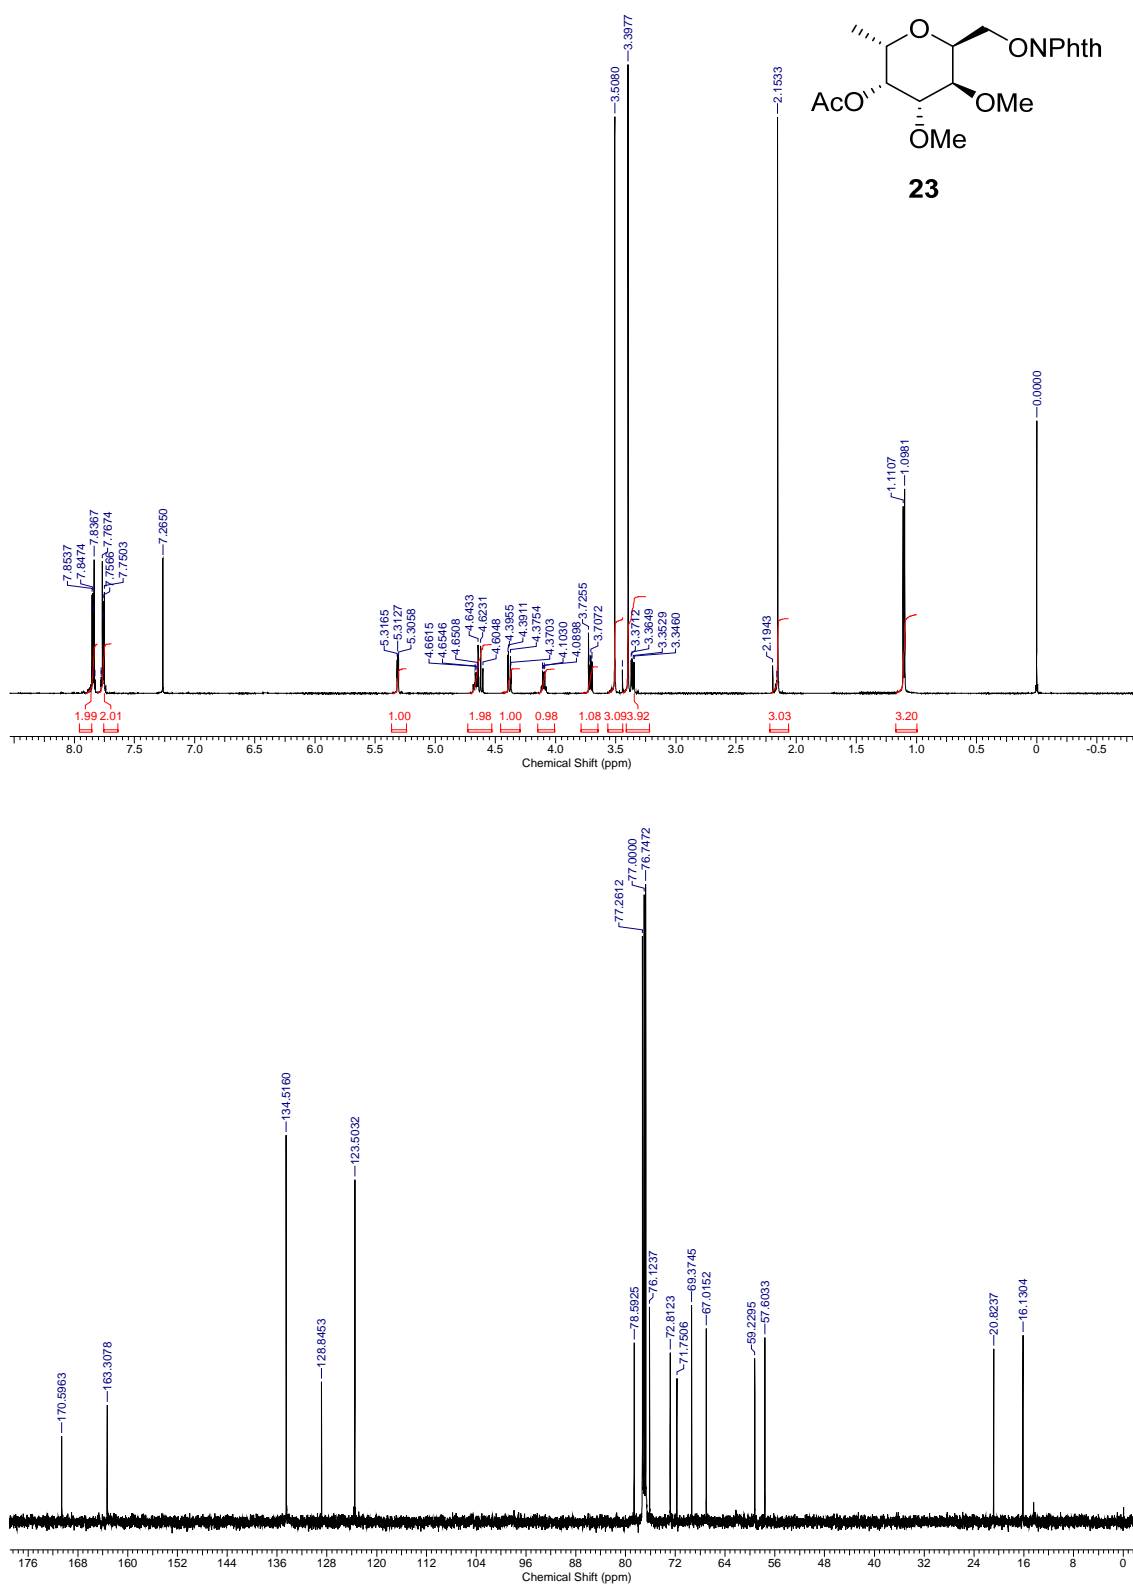

**Fig. S26.** <sup>1</sup>H NMR (500 MHz, CDCl<sub>3</sub>) and <sup>13</sup>C{<sup>1</sup>H} NMR (125.7 MHz, CDCl<sub>3</sub>) of compound **23**.



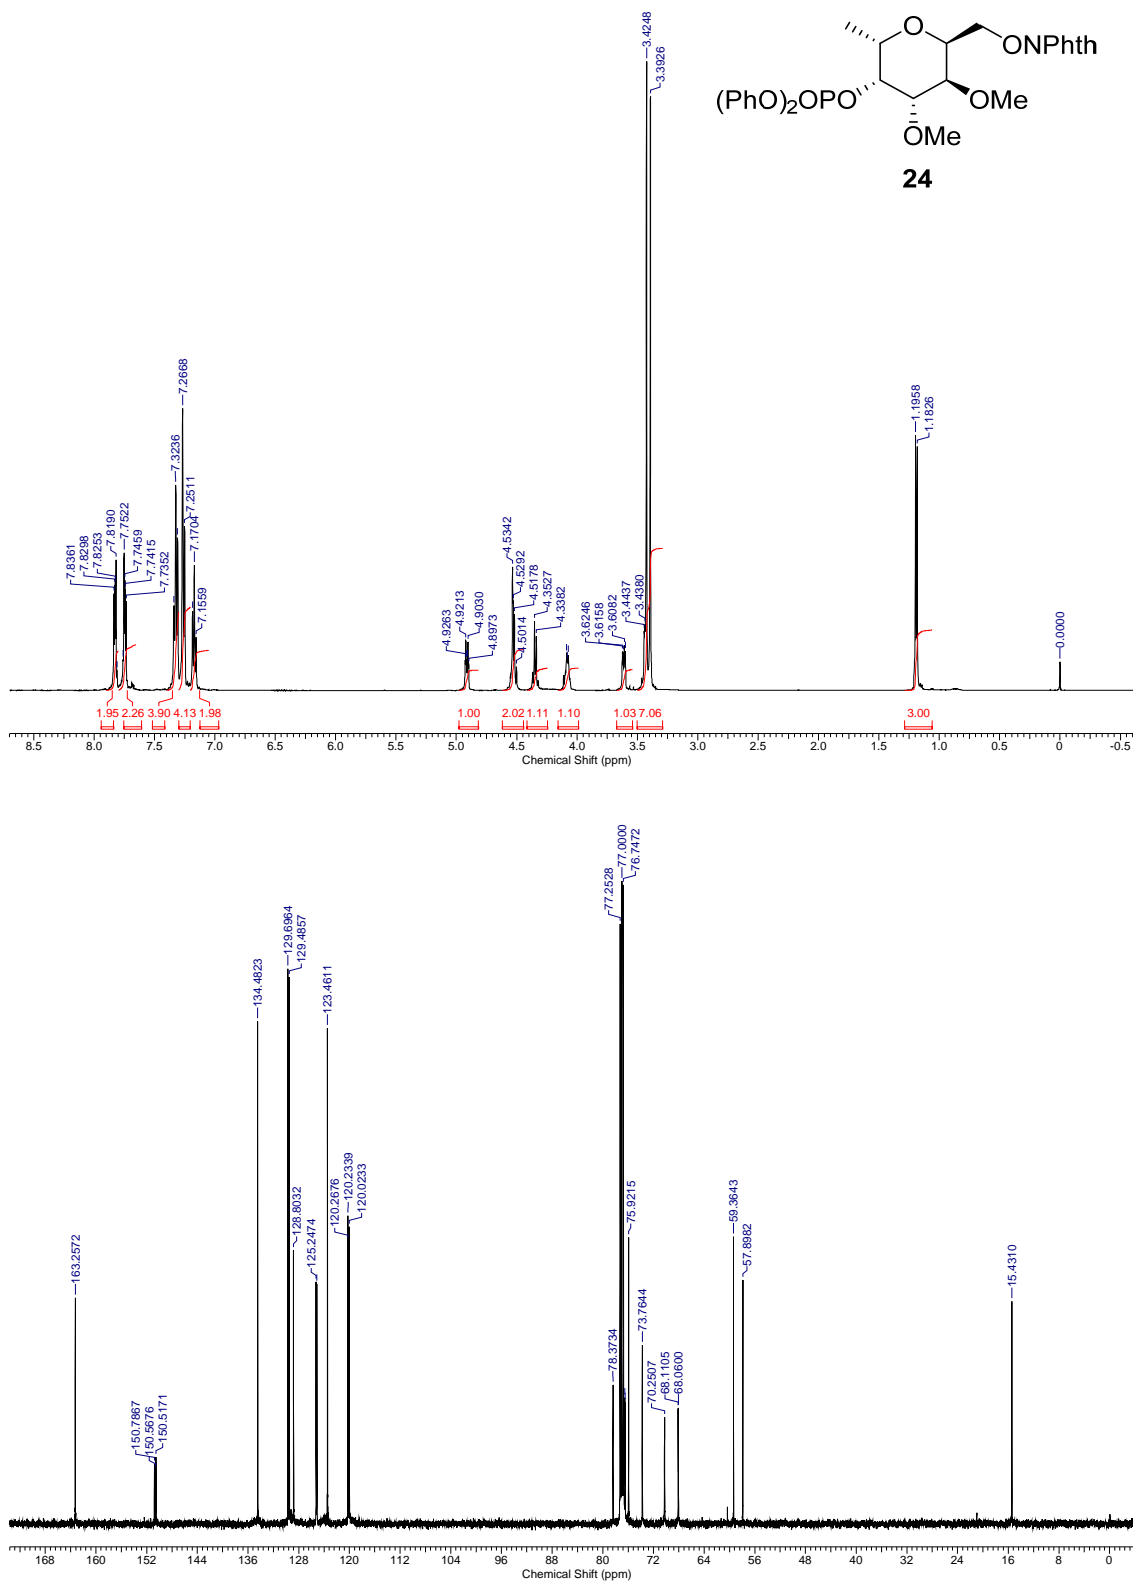

**Fig. S27.** <sup>1</sup>H NMR (500 MHz, CDCl<sub>3</sub>) and <sup>13</sup>C{<sup>1</sup>H} NMR (125.7 MHz, CDCl<sub>3</sub>) of compound **24**.

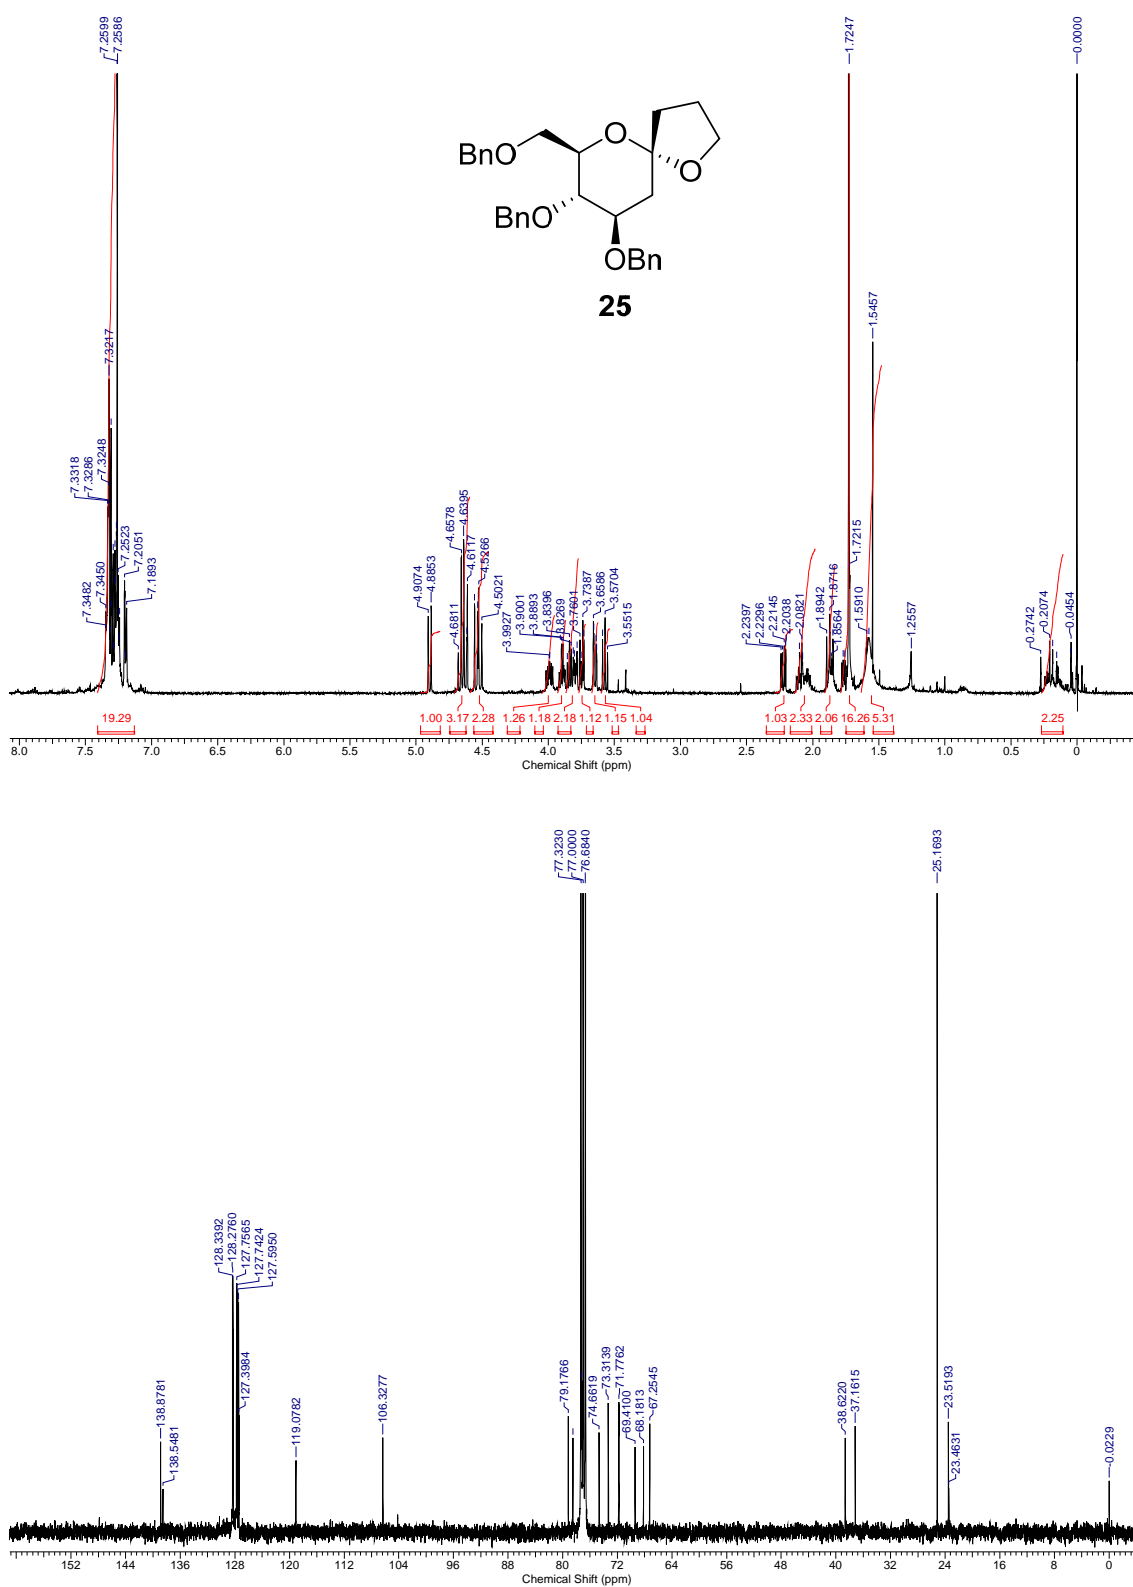

**Fig. S28.** <sup>1</sup>H NMR (500 MHz, CDCl<sub>3</sub>) and <sup>13</sup>C{<sup>1</sup>H} NMR (100.6 MHz, CDCl<sub>3</sub>) of compound **25**.

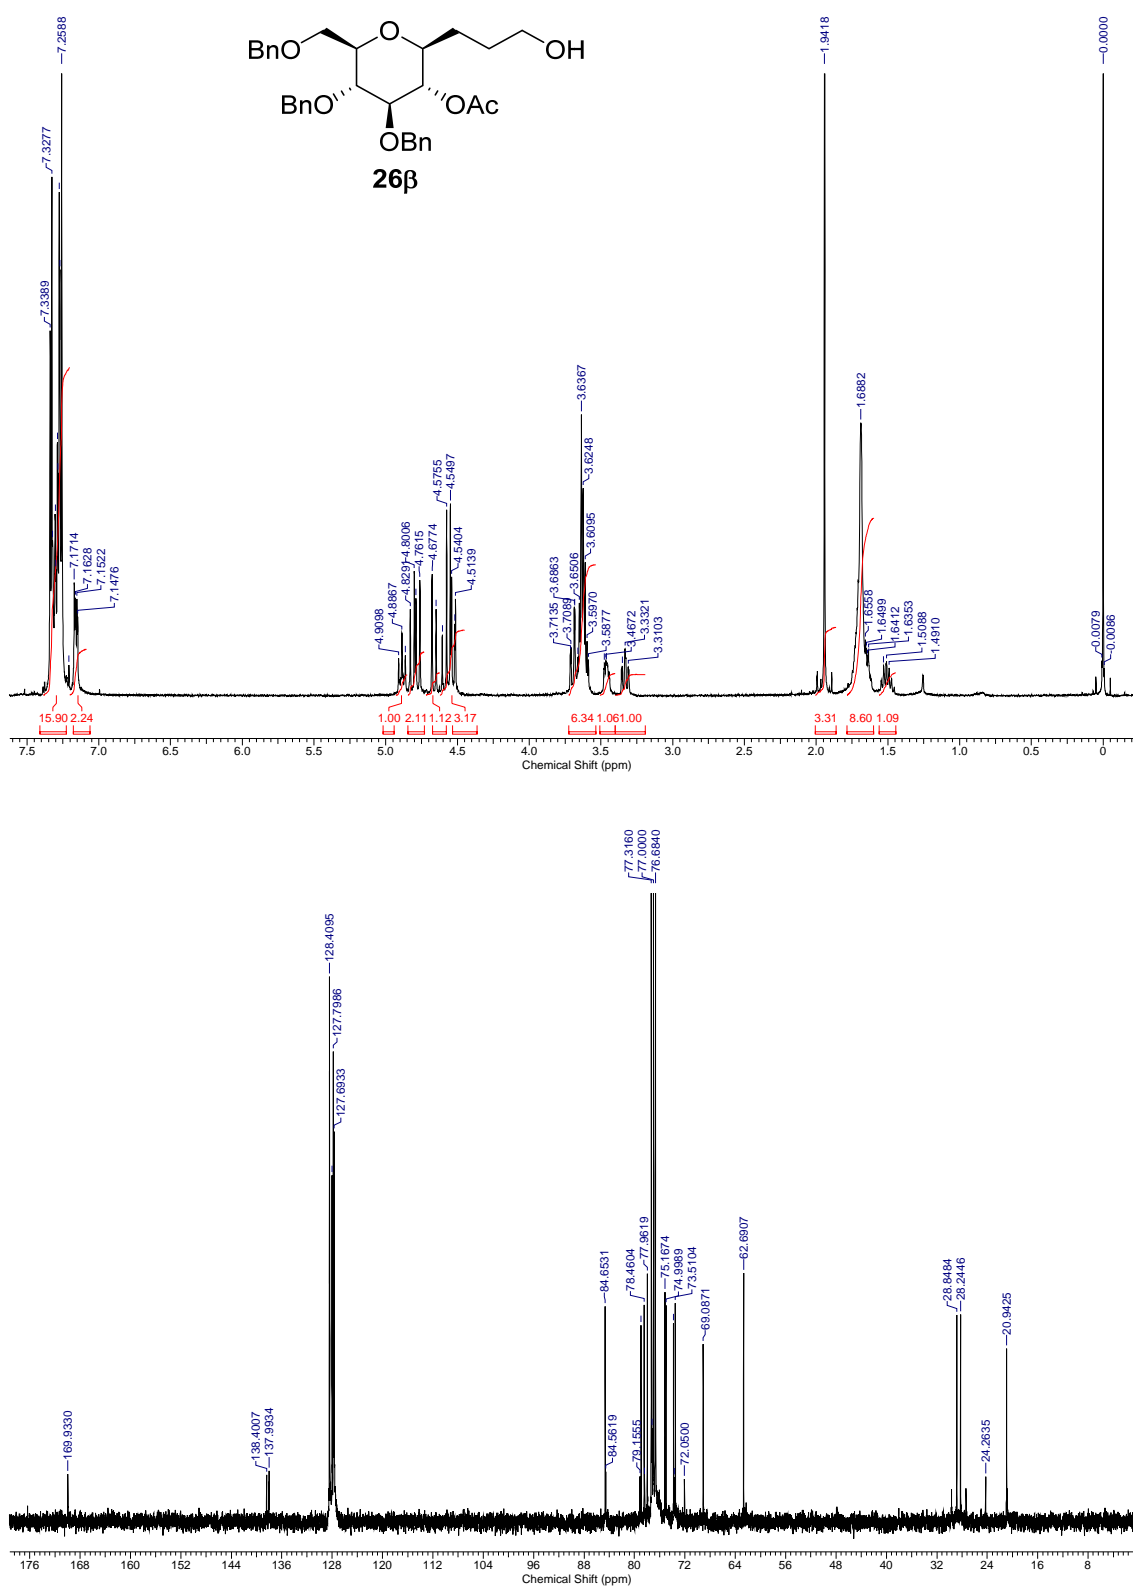

**Fig. S29.** <sup>1</sup>H NMR (400 MHz, CDCl<sub>3</sub>) and <sup>13</sup>C{H} NMR (100.6 MHz, CDCl<sub>3</sub>) of compound **26 $\beta$** .

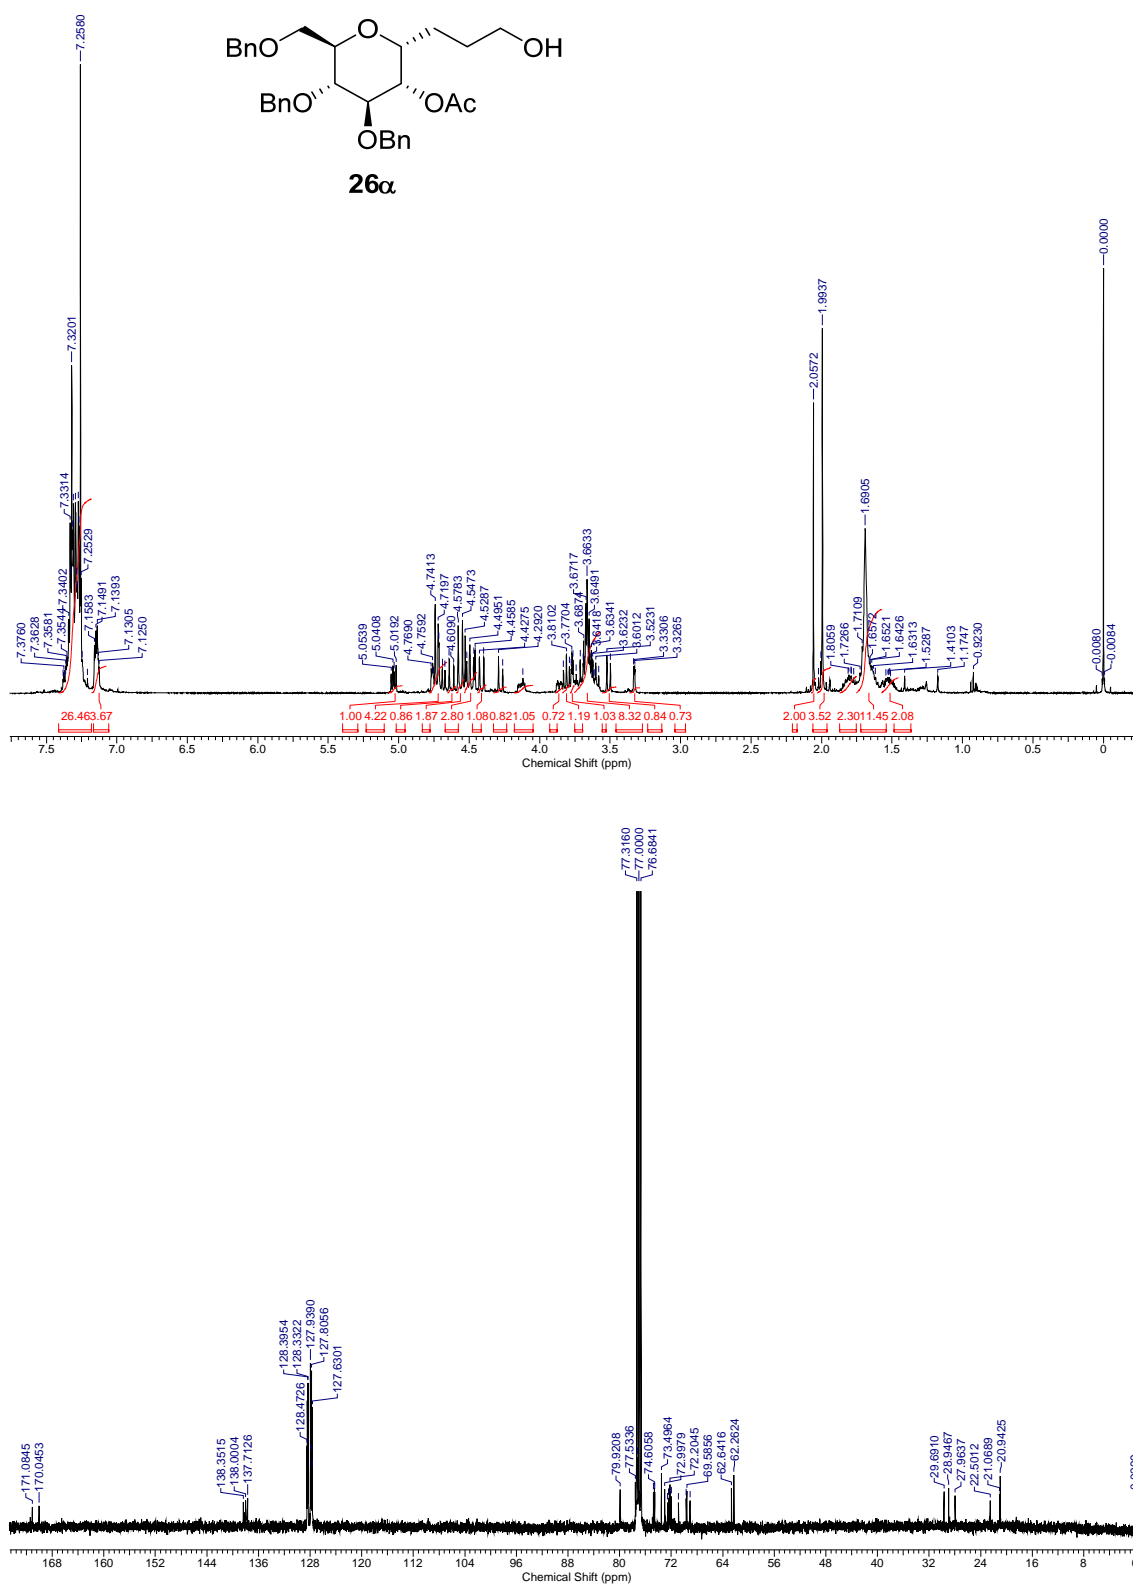

**Fig. S30.**  $^1\text{H}$  NMR (400 MHz,  $\text{CDCl}_3$ ) and  $^{13}\text{C}\{^1\text{H}\}$  NMR (100.6 MHz,  $\text{CDCl}_3$ ) of compound **26 $\alpha$** .

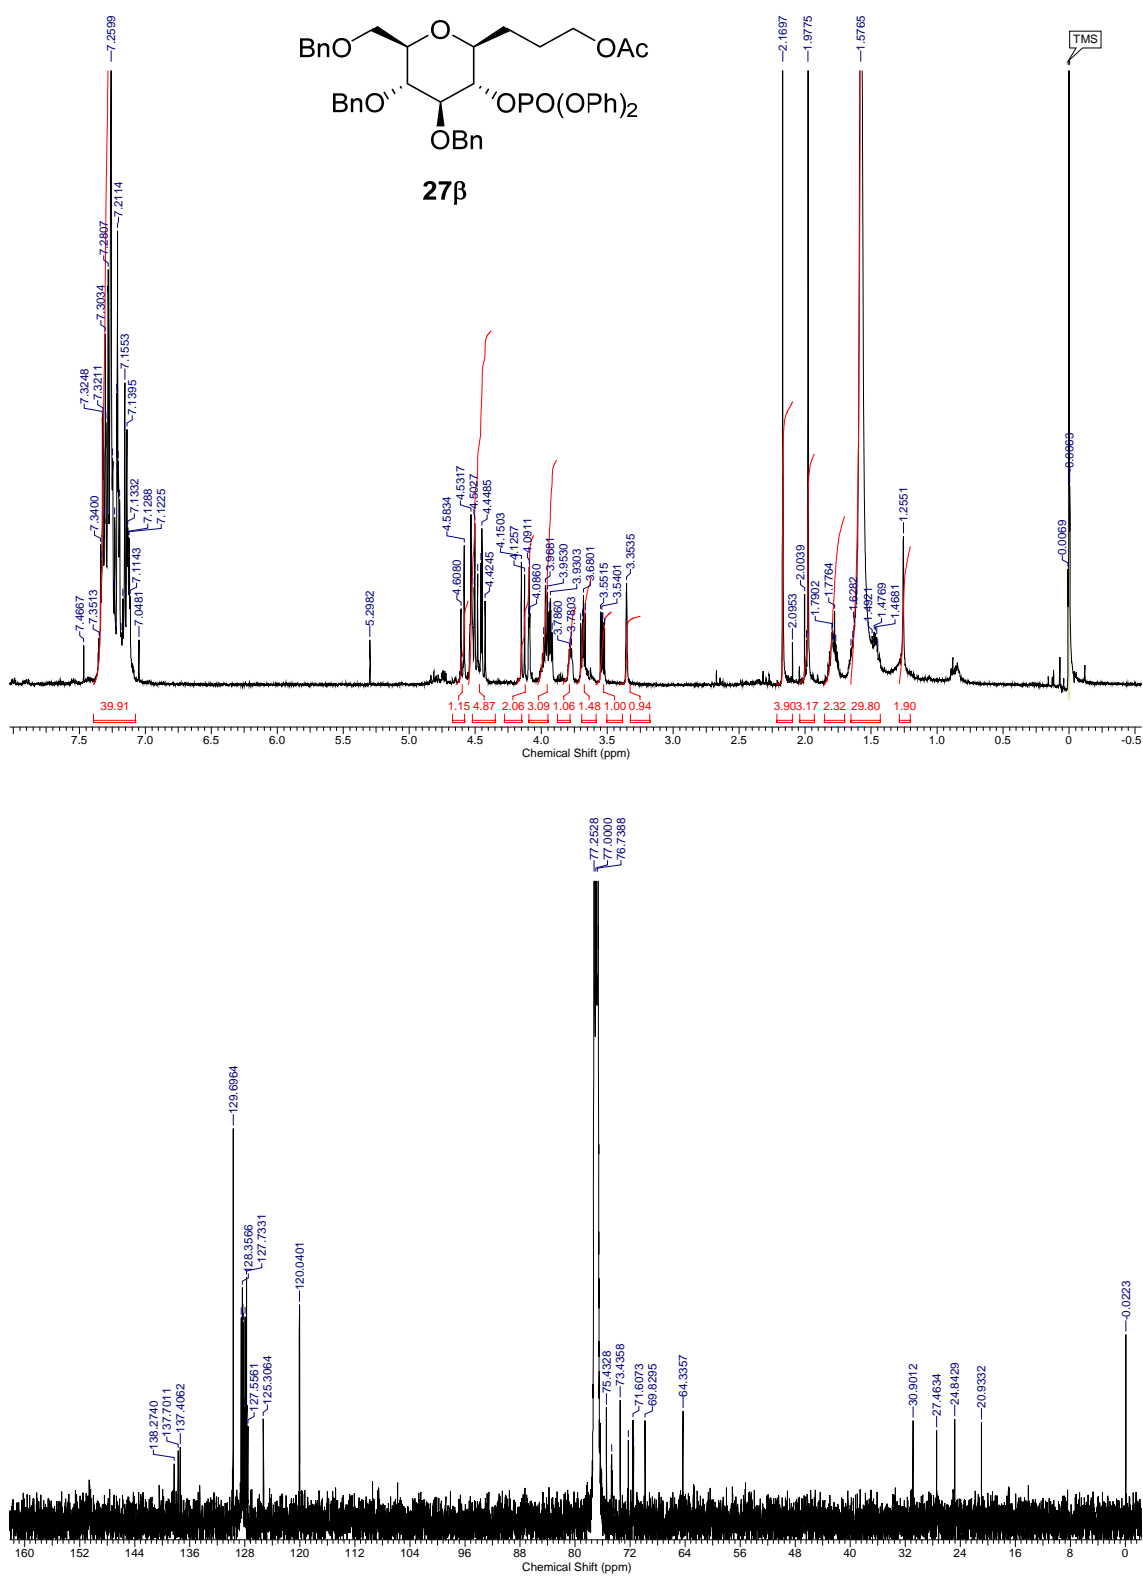

**Fig. S31.** <sup>1</sup>H NMR (500 MHz, CDCl<sub>3</sub>) and <sup>13</sup>C{H} NMR (125.7 MHz, CDCl<sub>3</sub>) of compound **27 $\beta$** .

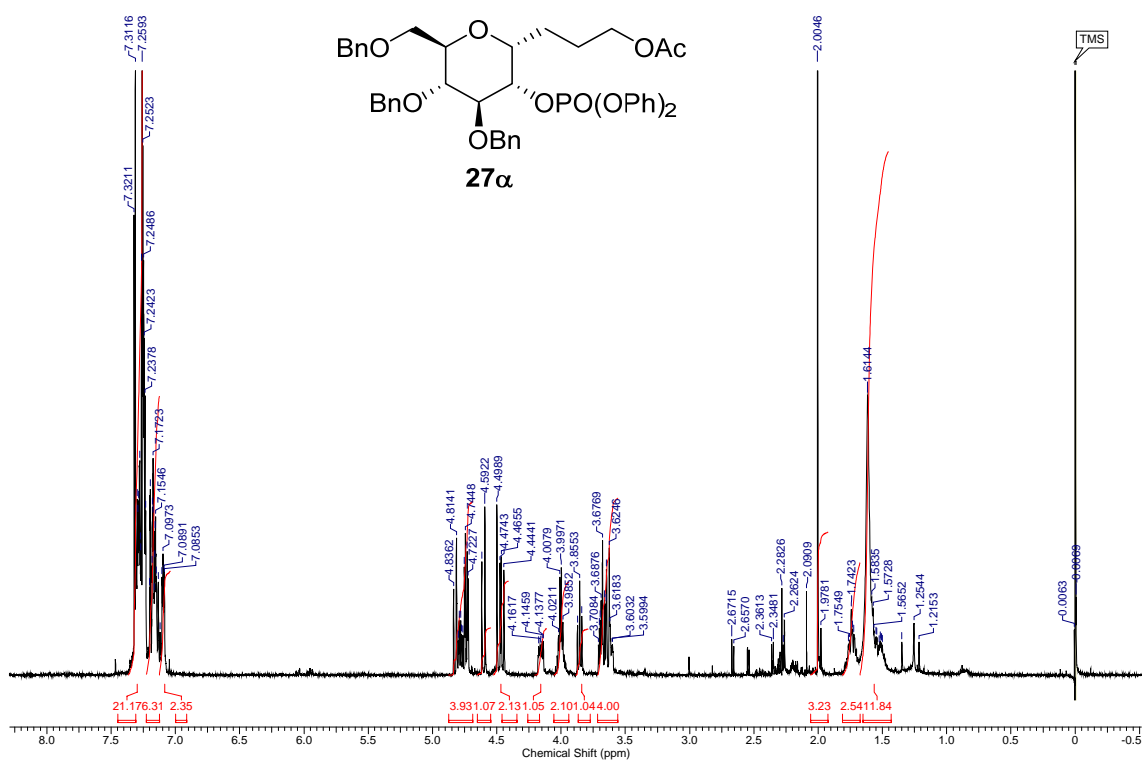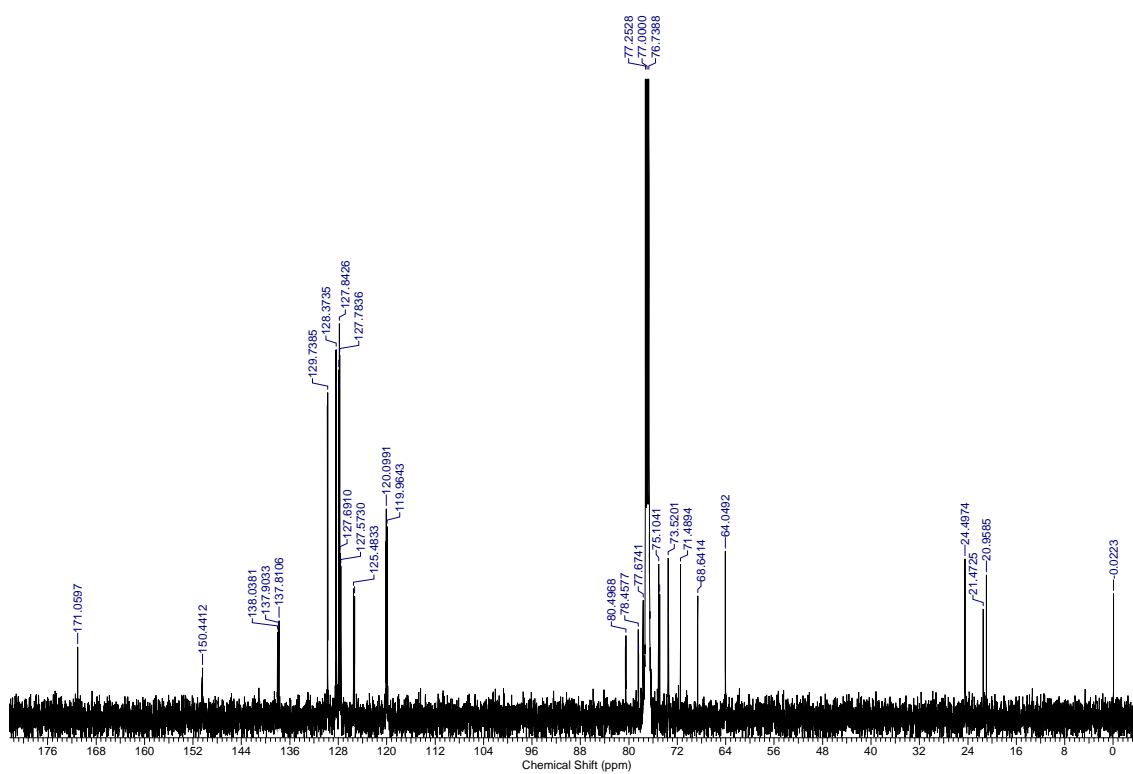

Fig. S32.  $^1\text{H}$  NMR (500 MHz,  $\text{CDCl}_3$ ) and  $^{13}\text{C}\{^1\text{H}\}$  NMR (125.7 MHz,  $\text{CDCl}_3$ ) of compound **27 $\alpha$** .

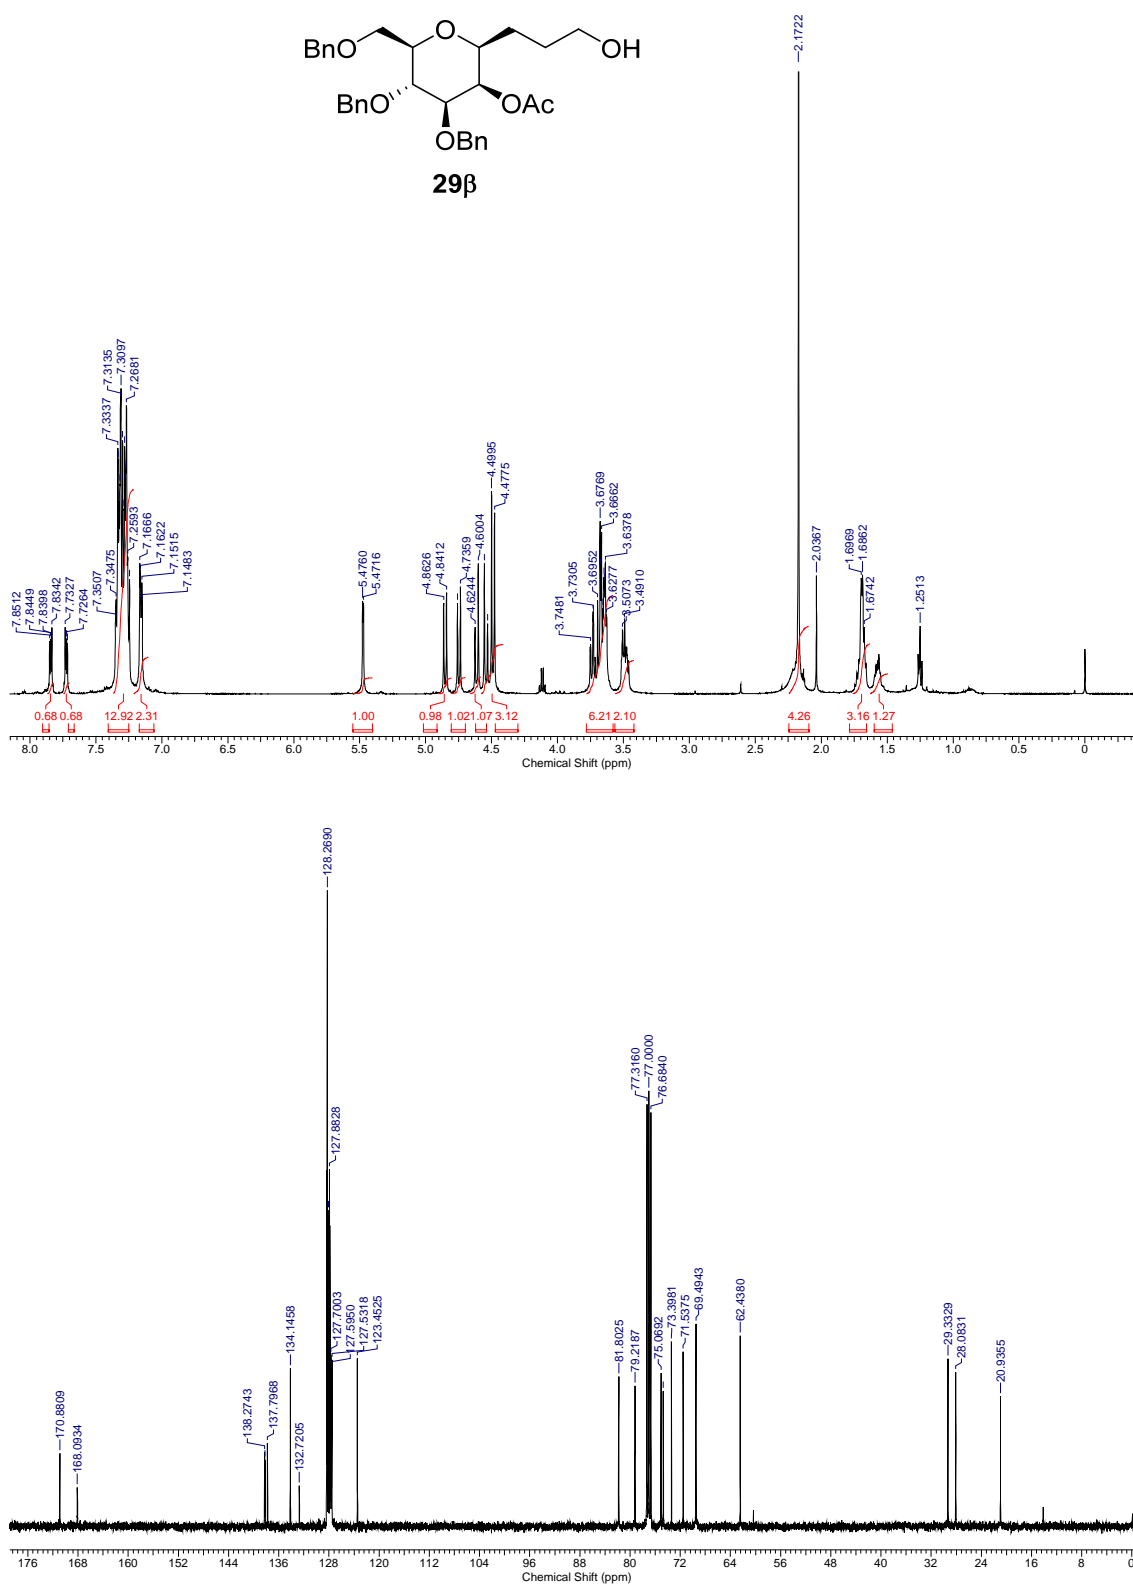

**Fig. S33.**  $^1\text{H}$  NMR (500 MHz,  $\text{CDCl}_3$ ) and  $^{13}\text{C}\{^1\text{H}\}$  NMR (100.6 MHz,  $\text{CDCl}_3$ ) of compound **29 $\beta$** .

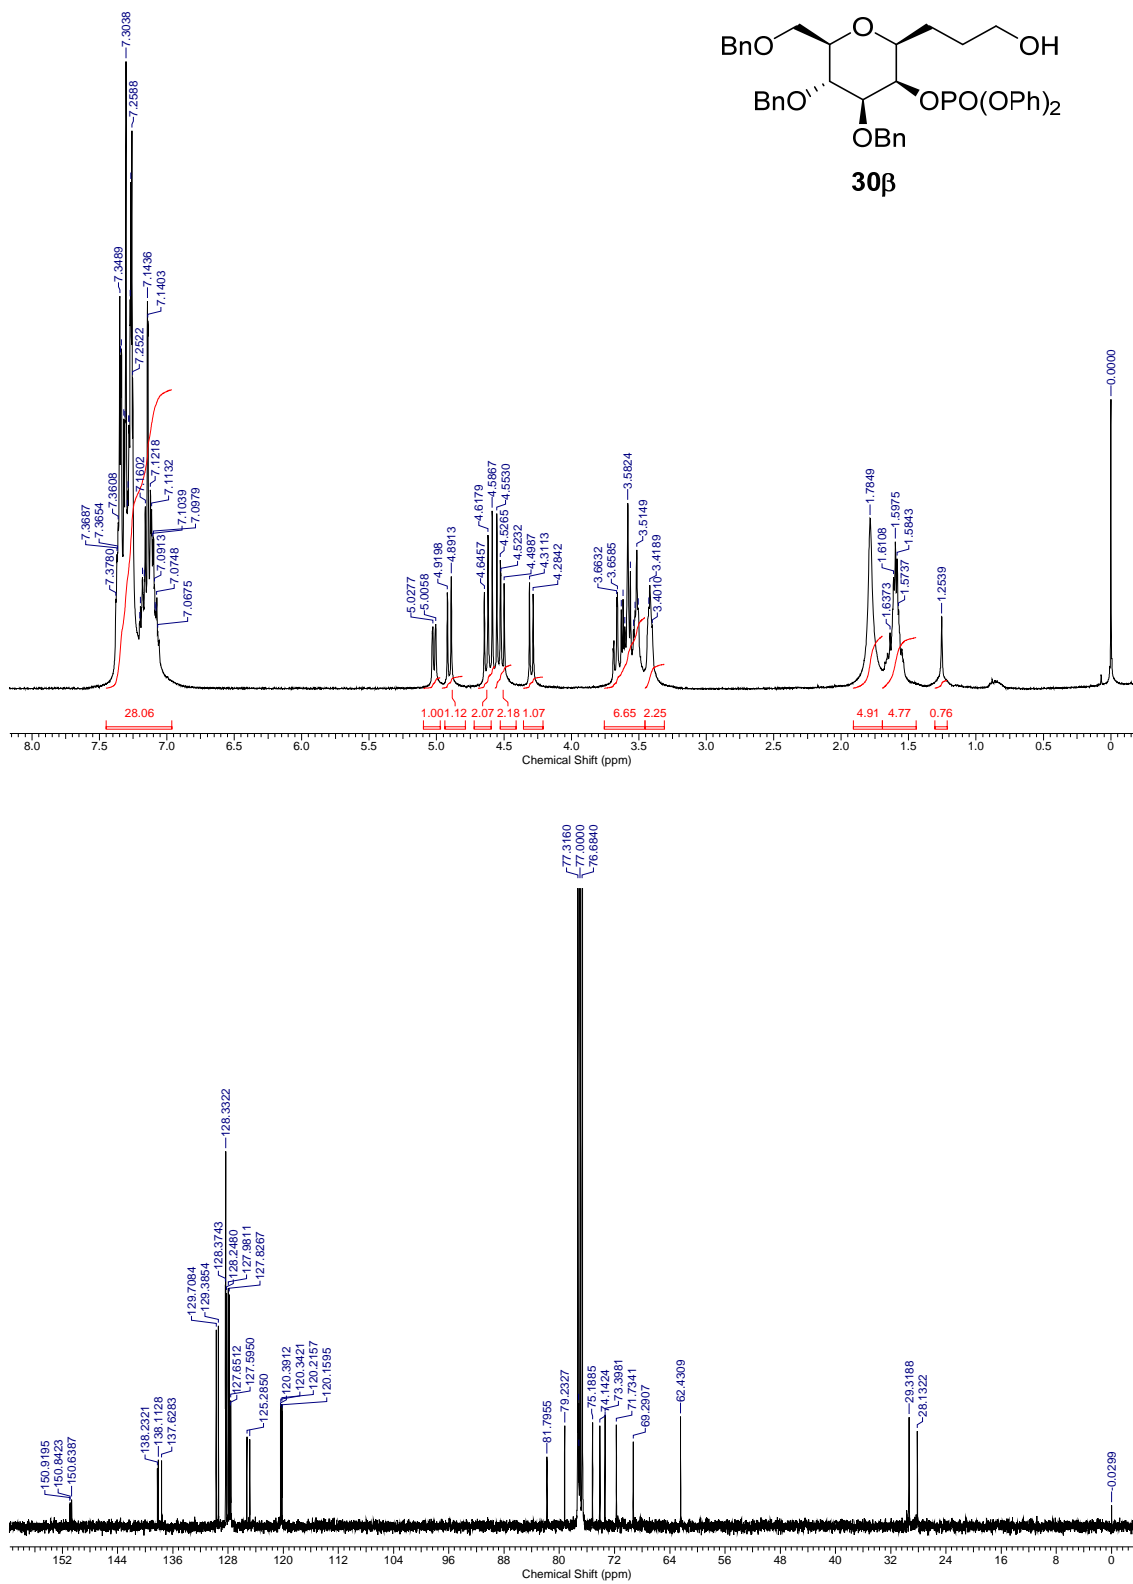

**Fig. S34.** <sup>1</sup>H NMR (400 MHz, CDCl<sub>3</sub>) and <sup>13</sup>C{<sup>1</sup>H} NMR (100.6 MHz, CDCl<sub>3</sub>) of compound **30β**.



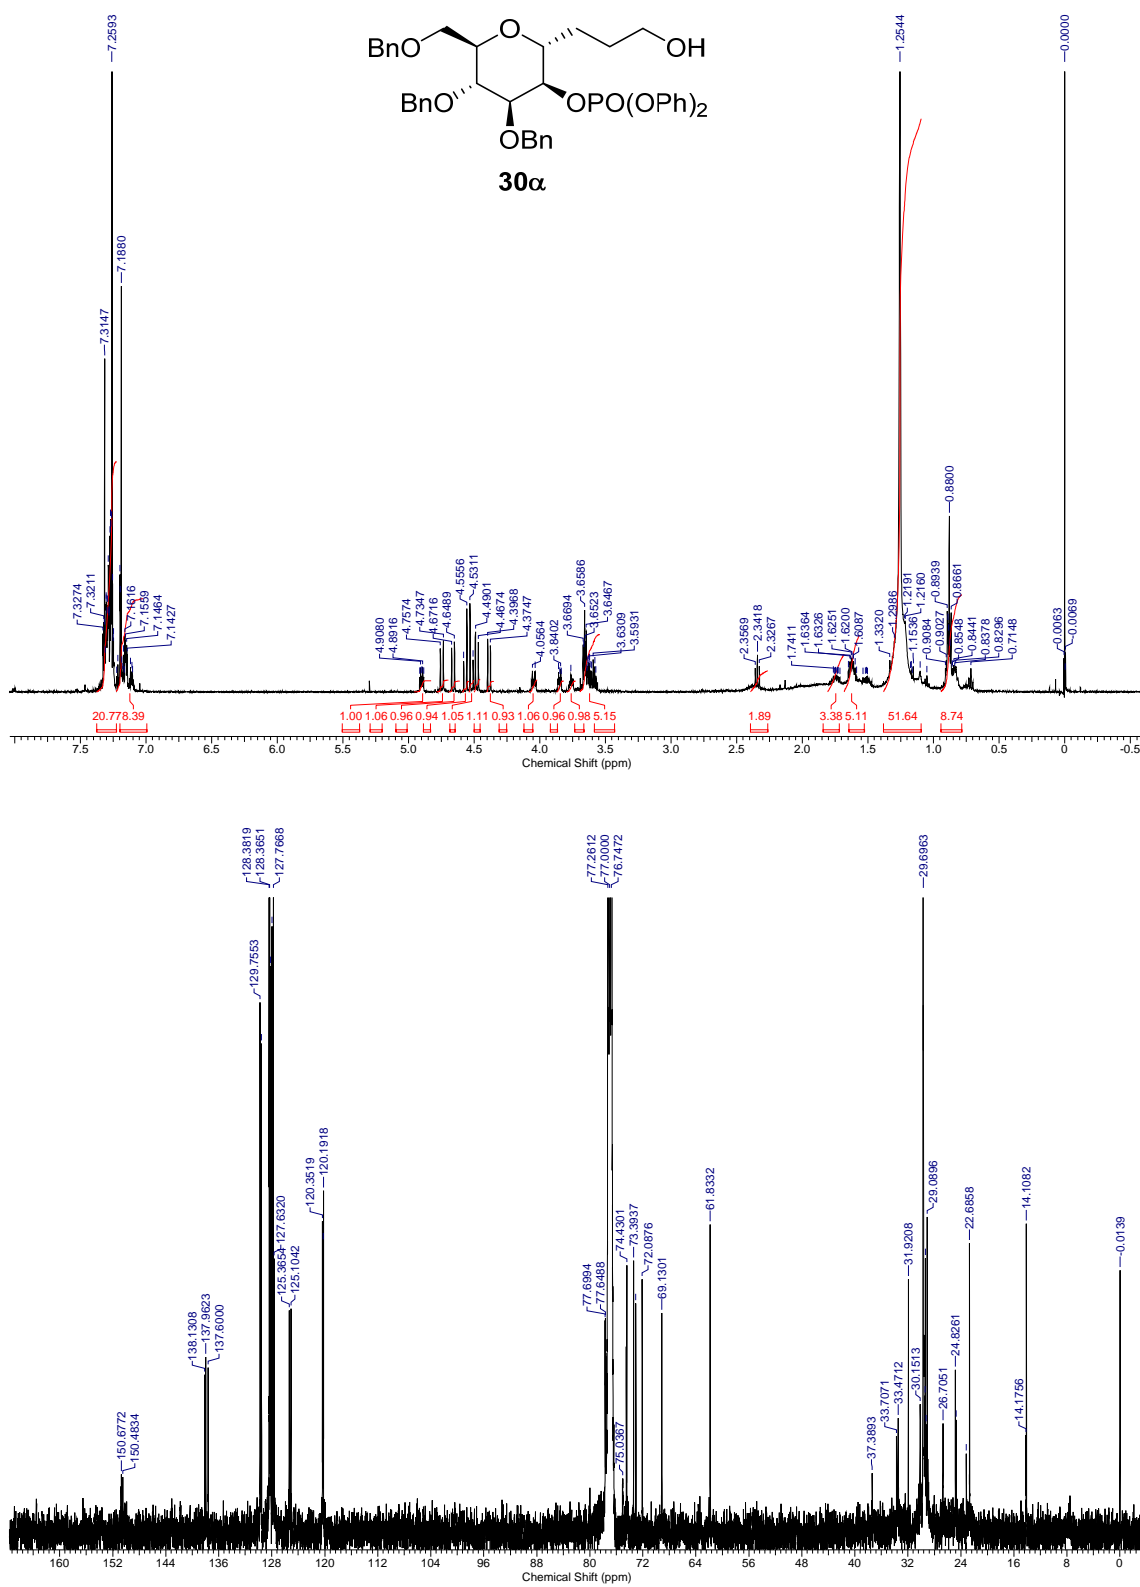

**Fig. S35.**  $^1\text{H}$  NMR (500 MHz,  $\text{CDCl}_3$ ) and  $^{13}\text{C}\{^1\text{H}\}$  NMR (125.7 MHz,  $\text{CDCl}_3$ ) of compound **30 $\alpha$** .

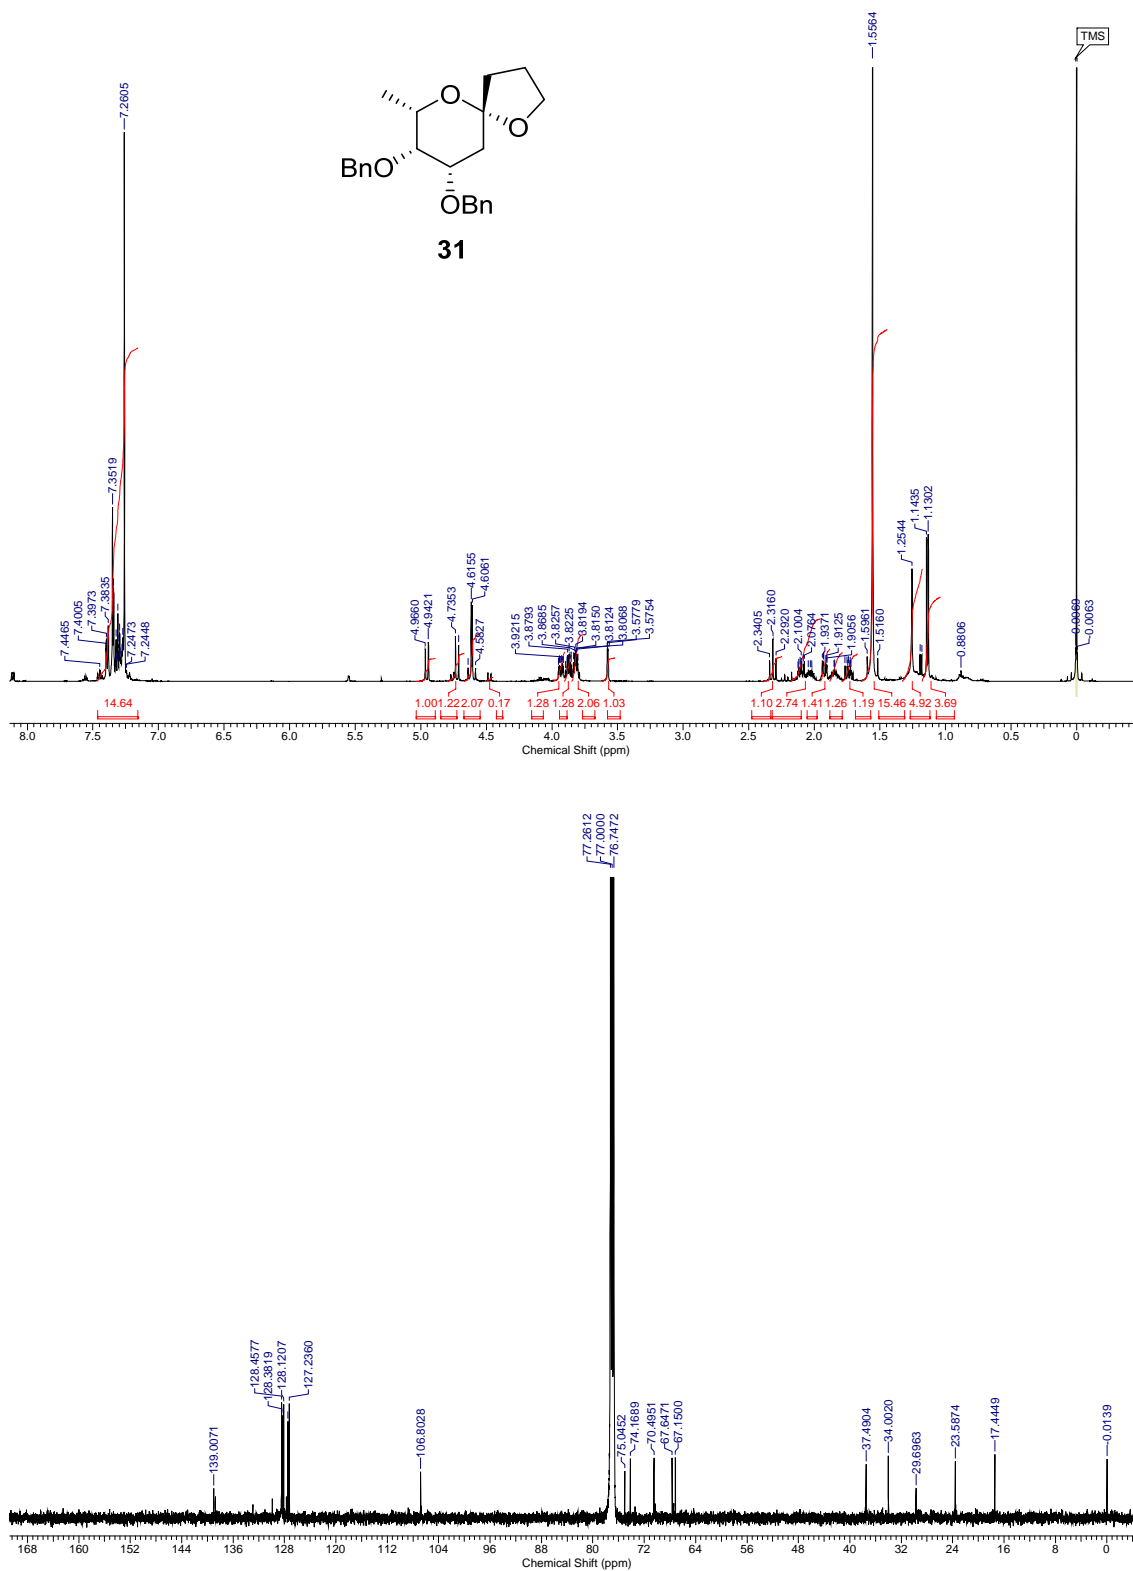

**Fig. S36.** <sup>1</sup>H NMR (500 MHz, CDCl<sub>3</sub>) and <sup>13</sup>C{H} NMR (125.7 MHz, CDCl<sub>3</sub>) of compound **31**.

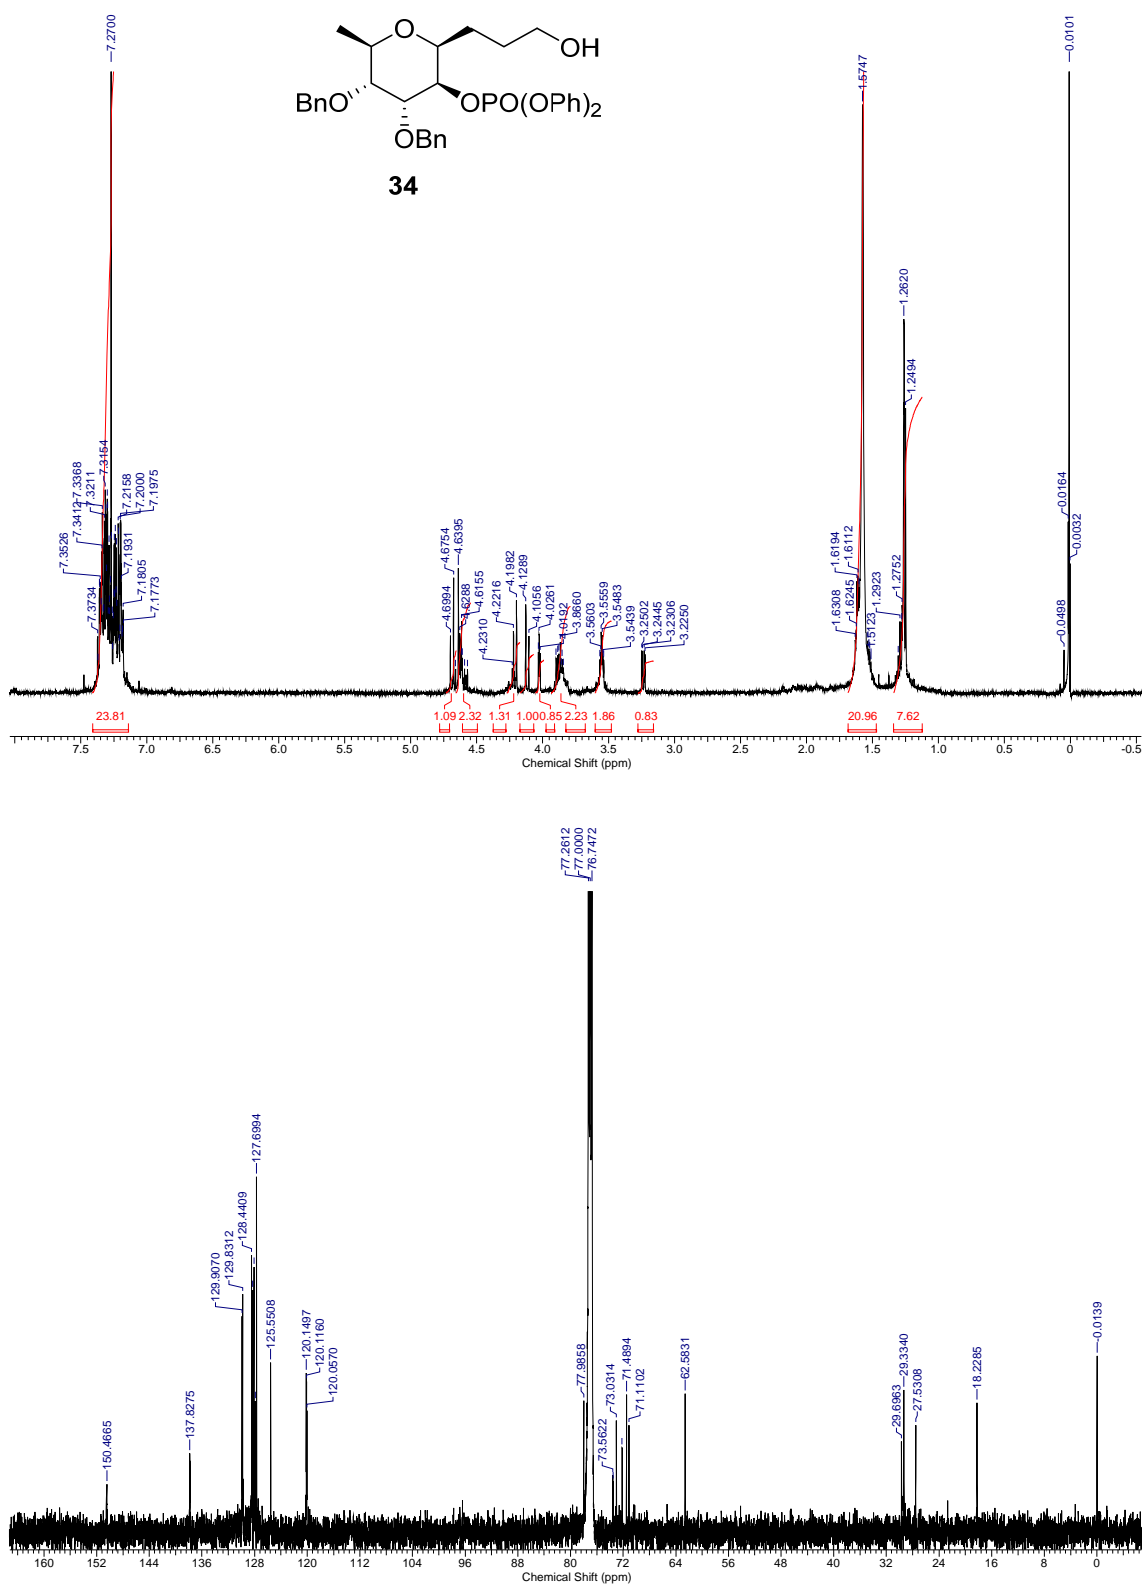

**Fig. S37.** <sup>1</sup>H NMR (500 MHz, CDCl<sub>3</sub>) and <sup>13</sup>C{<sup>1</sup>H} NMR (125.7 MHz, CDCl<sub>3</sub>) of compound **34**.

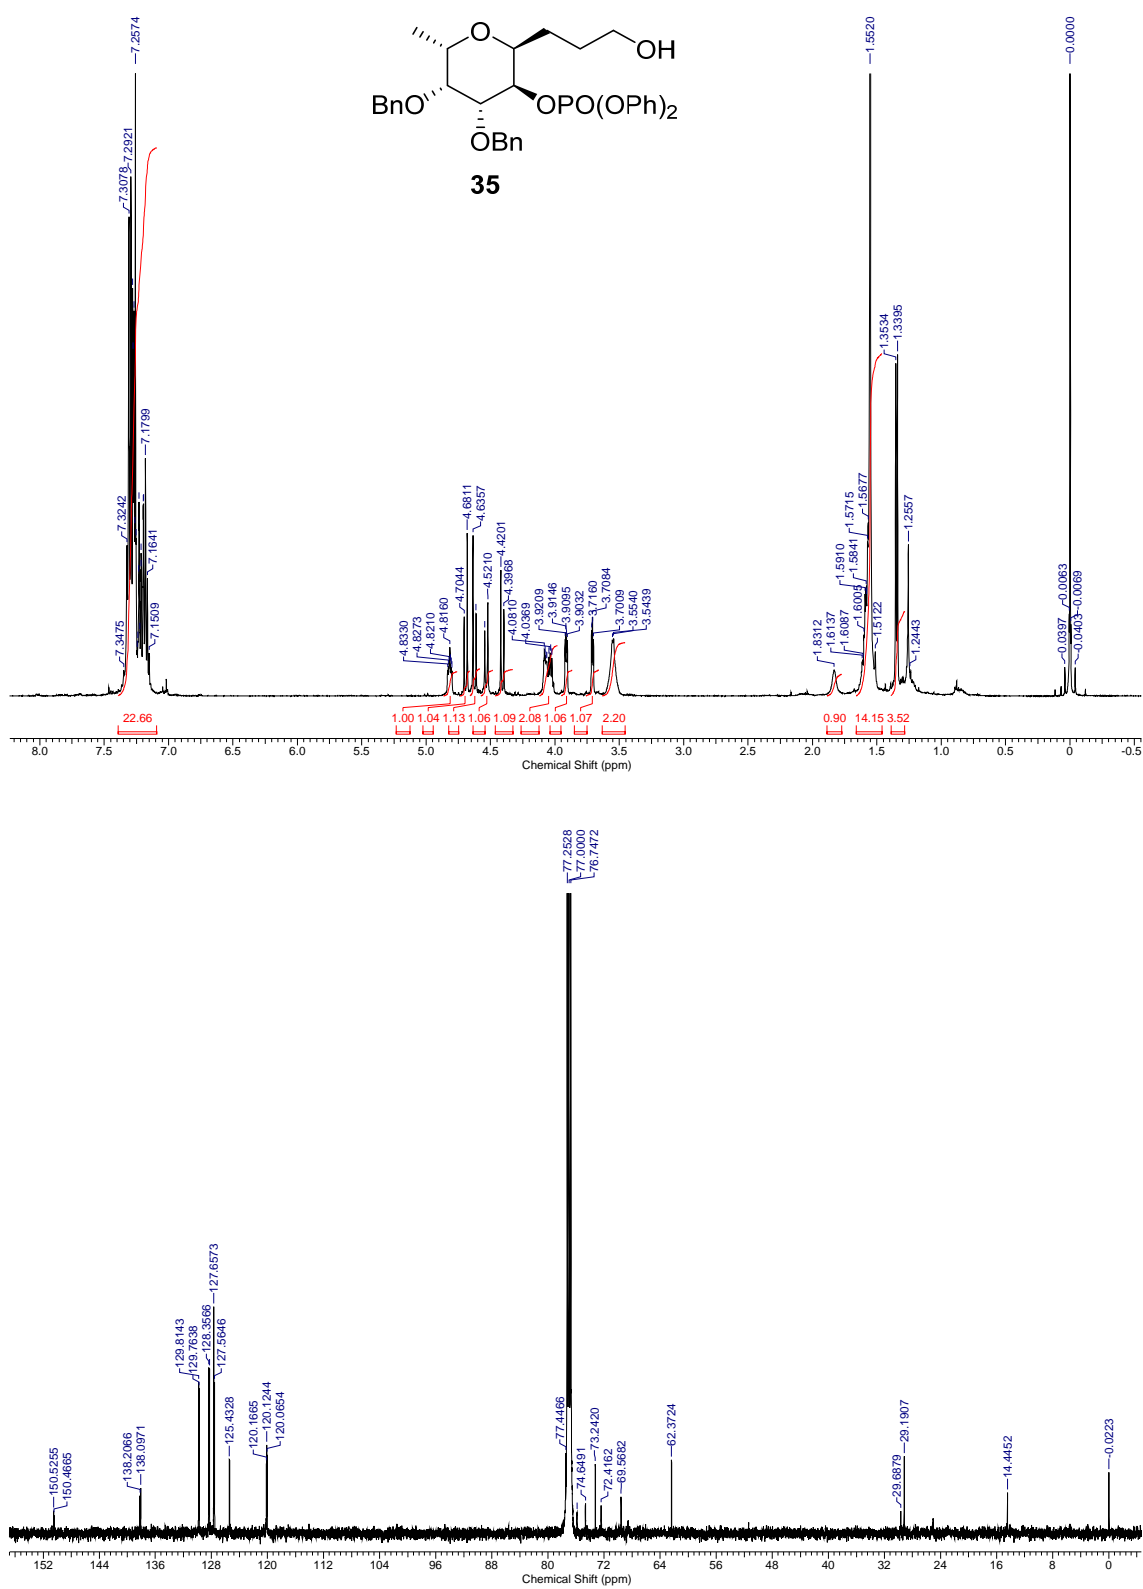

**Fig. S38.** <sup>1</sup>H NMR (500 MHz, CDCl<sub>3</sub>) and <sup>13</sup>C{<sup>1</sup>H} NMR (125.7 MHz, CDCl<sub>3</sub>) of compound **35**.

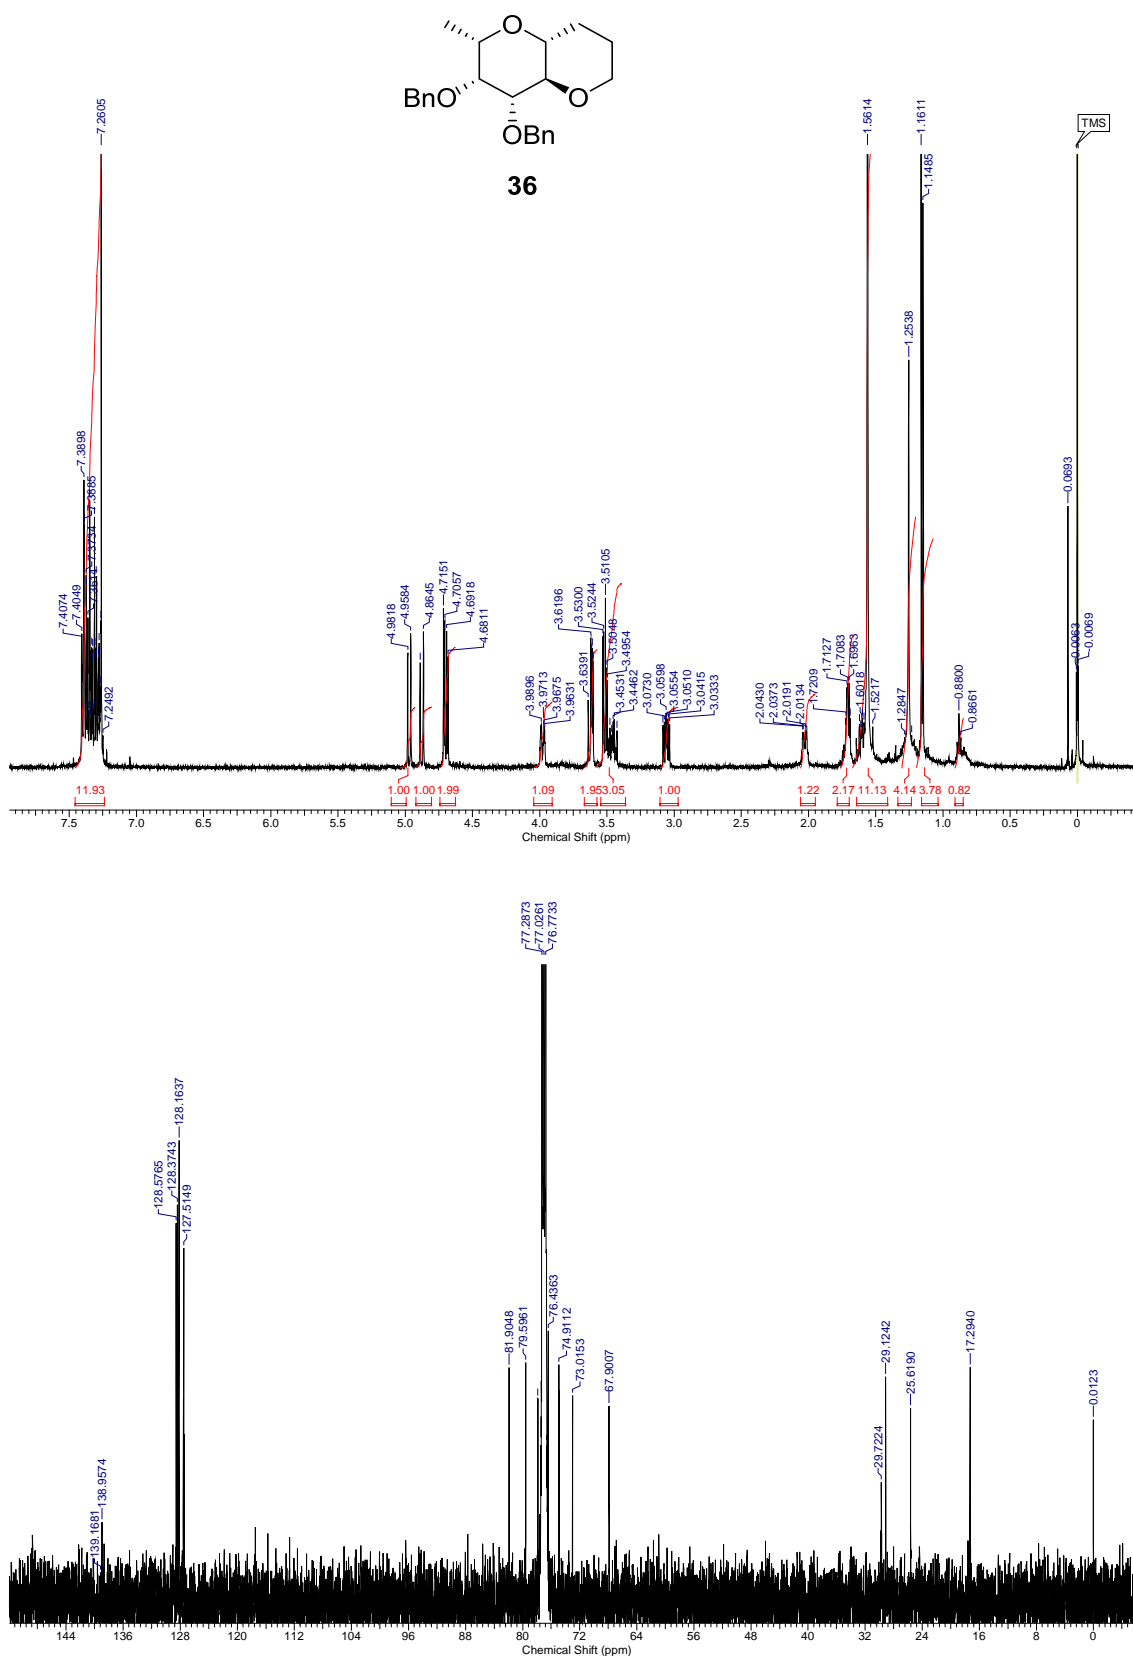

**Fig. S39.**  $^1\text{H}$  NMR (500 MHz,  $\text{CDCl}_3$ ) and  $^{13}\text{C}\{\text{H}\}$  NMR (125.7 MHz,  $\text{CDCl}_3$ ) of compound **36**.

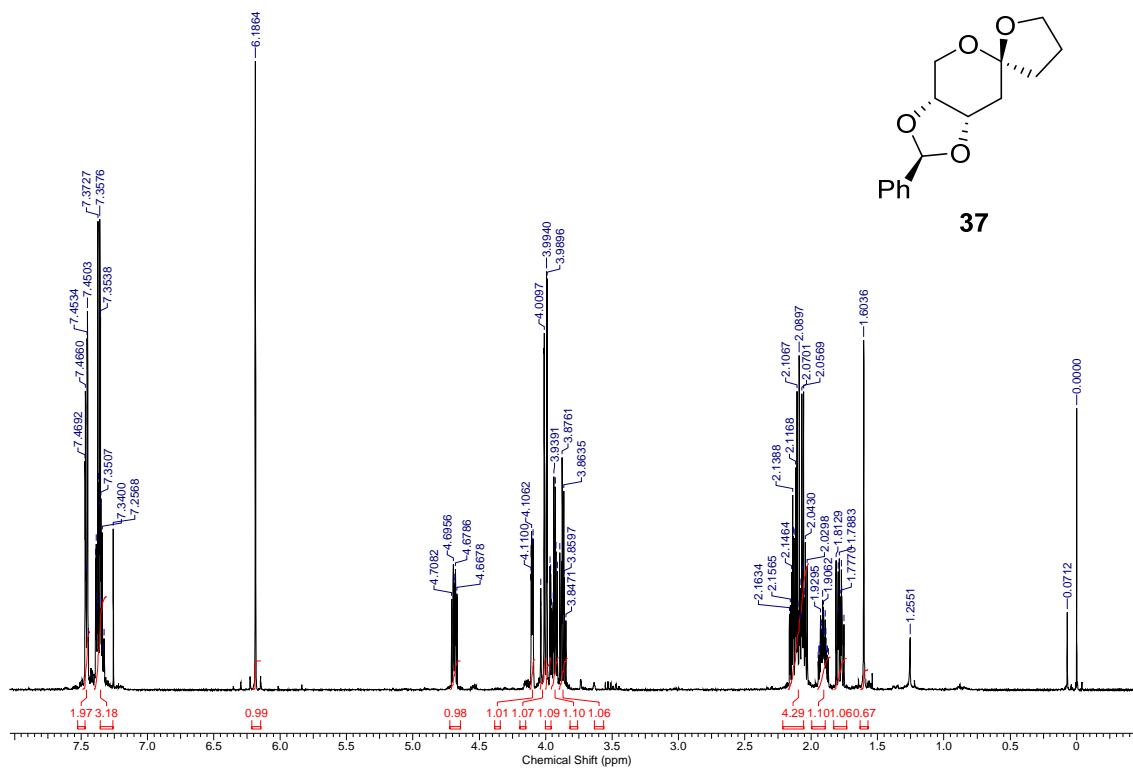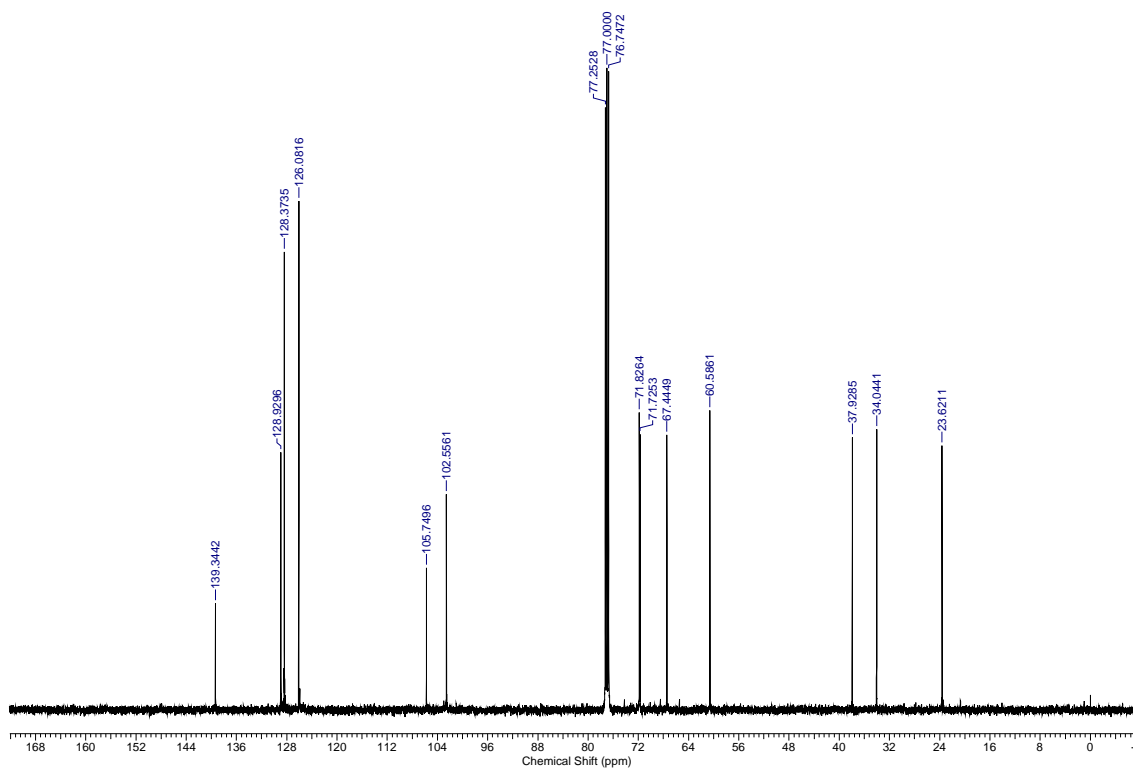

**Fig. S40.** <sup>1</sup>H NMR (500 MHz, CDCl<sub>3</sub>) and <sup>13</sup>C{H} NMR (125.7 MHz, CDCl<sub>3</sub>) of compound **37**.

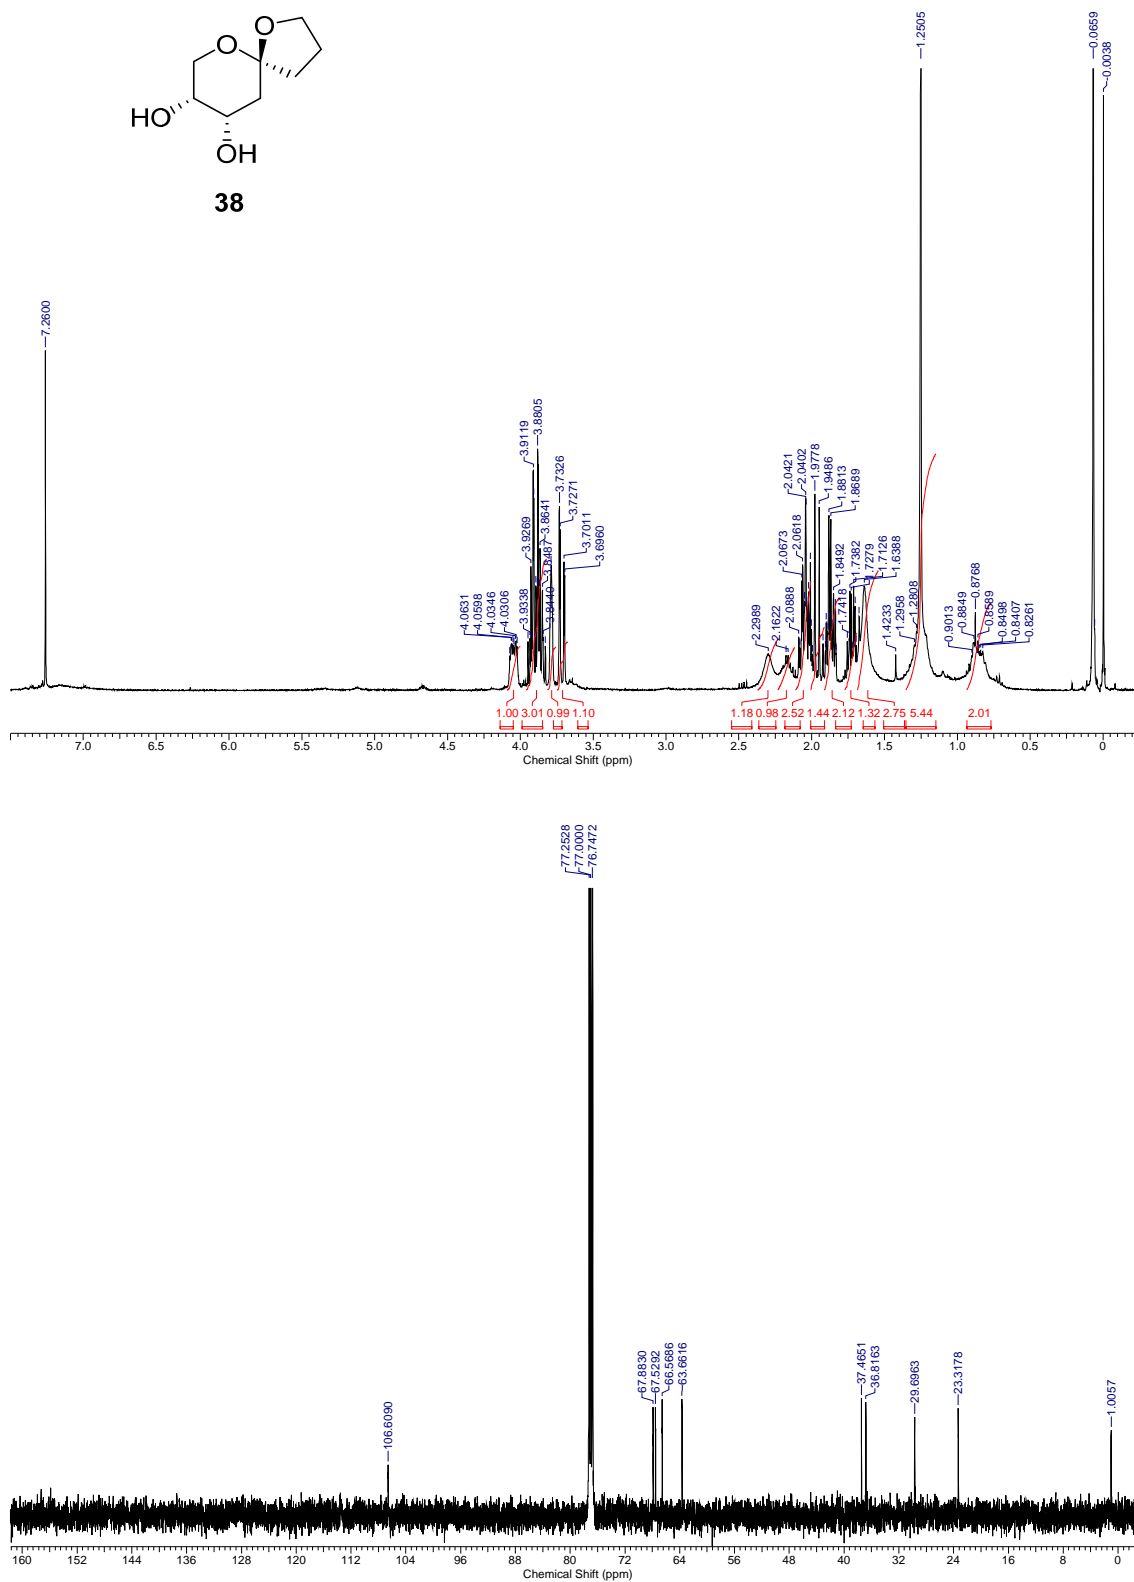

**Fig. S41.** <sup>1</sup>H NMR (400 MHz, CDCl<sub>3</sub>) and <sup>13</sup>C{H} NMR (125.7 MHz, CDCl<sub>3</sub>) of compound **38**.

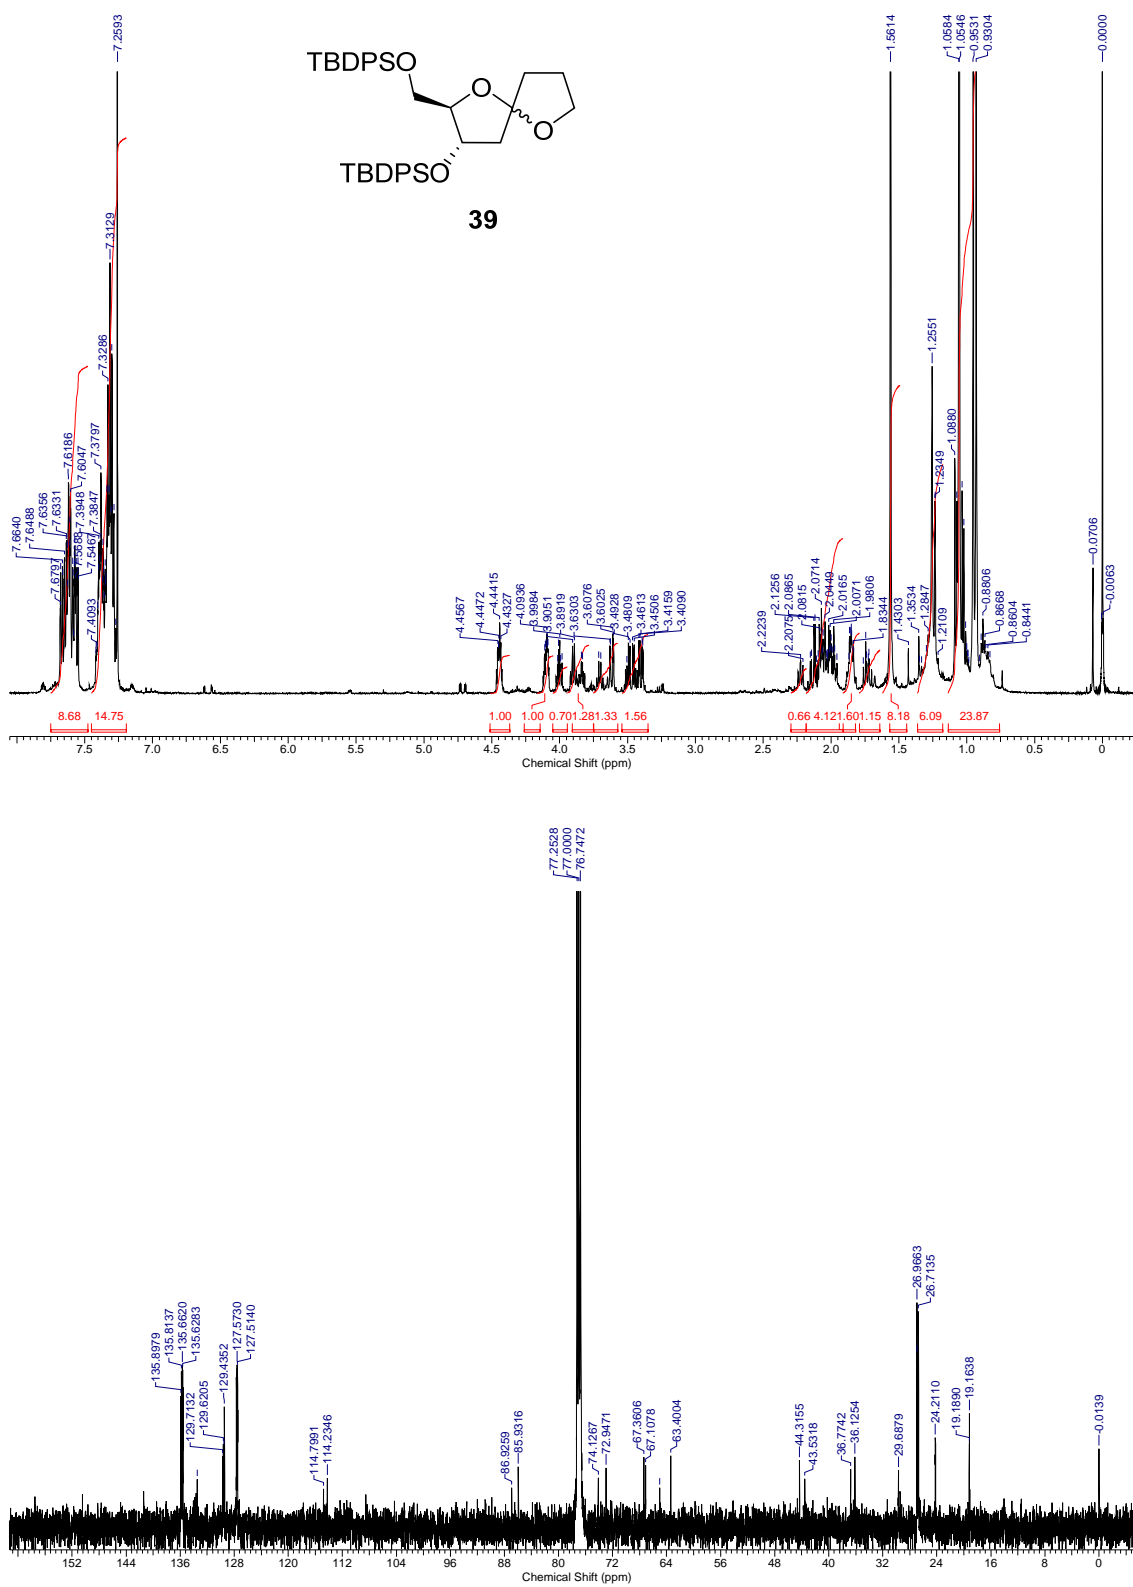

**Fig. S42.** <sup>1</sup>H NMR (500 MHz, CDCl<sub>3</sub>) and <sup>13</sup>C{<sup>1</sup>H} NMR (125.7 MHz, CDCl<sub>3</sub>) of compound **39**.



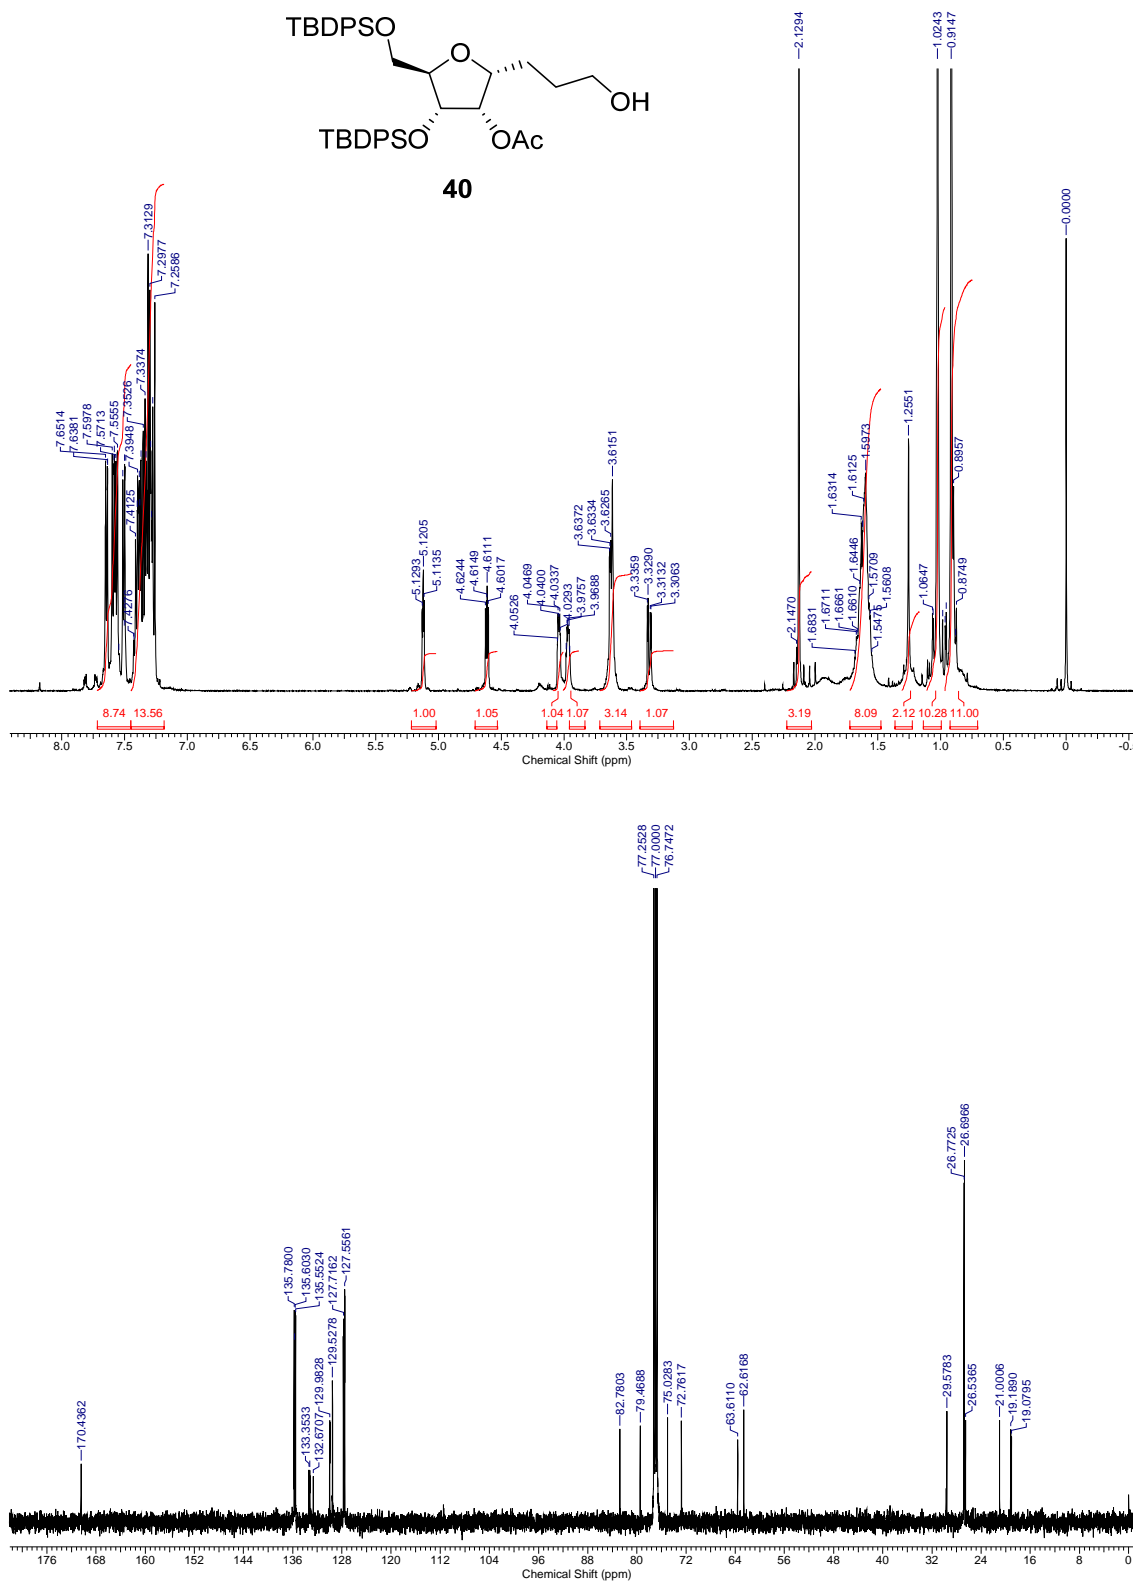

**Fig. S43.** <sup>1</sup>H NMR (500 MHz, CDCl<sub>3</sub>) and <sup>13</sup>C{<sup>1</sup>H} NMR (125.7 MHz, CDCl<sub>3</sub>) of compound **40**.

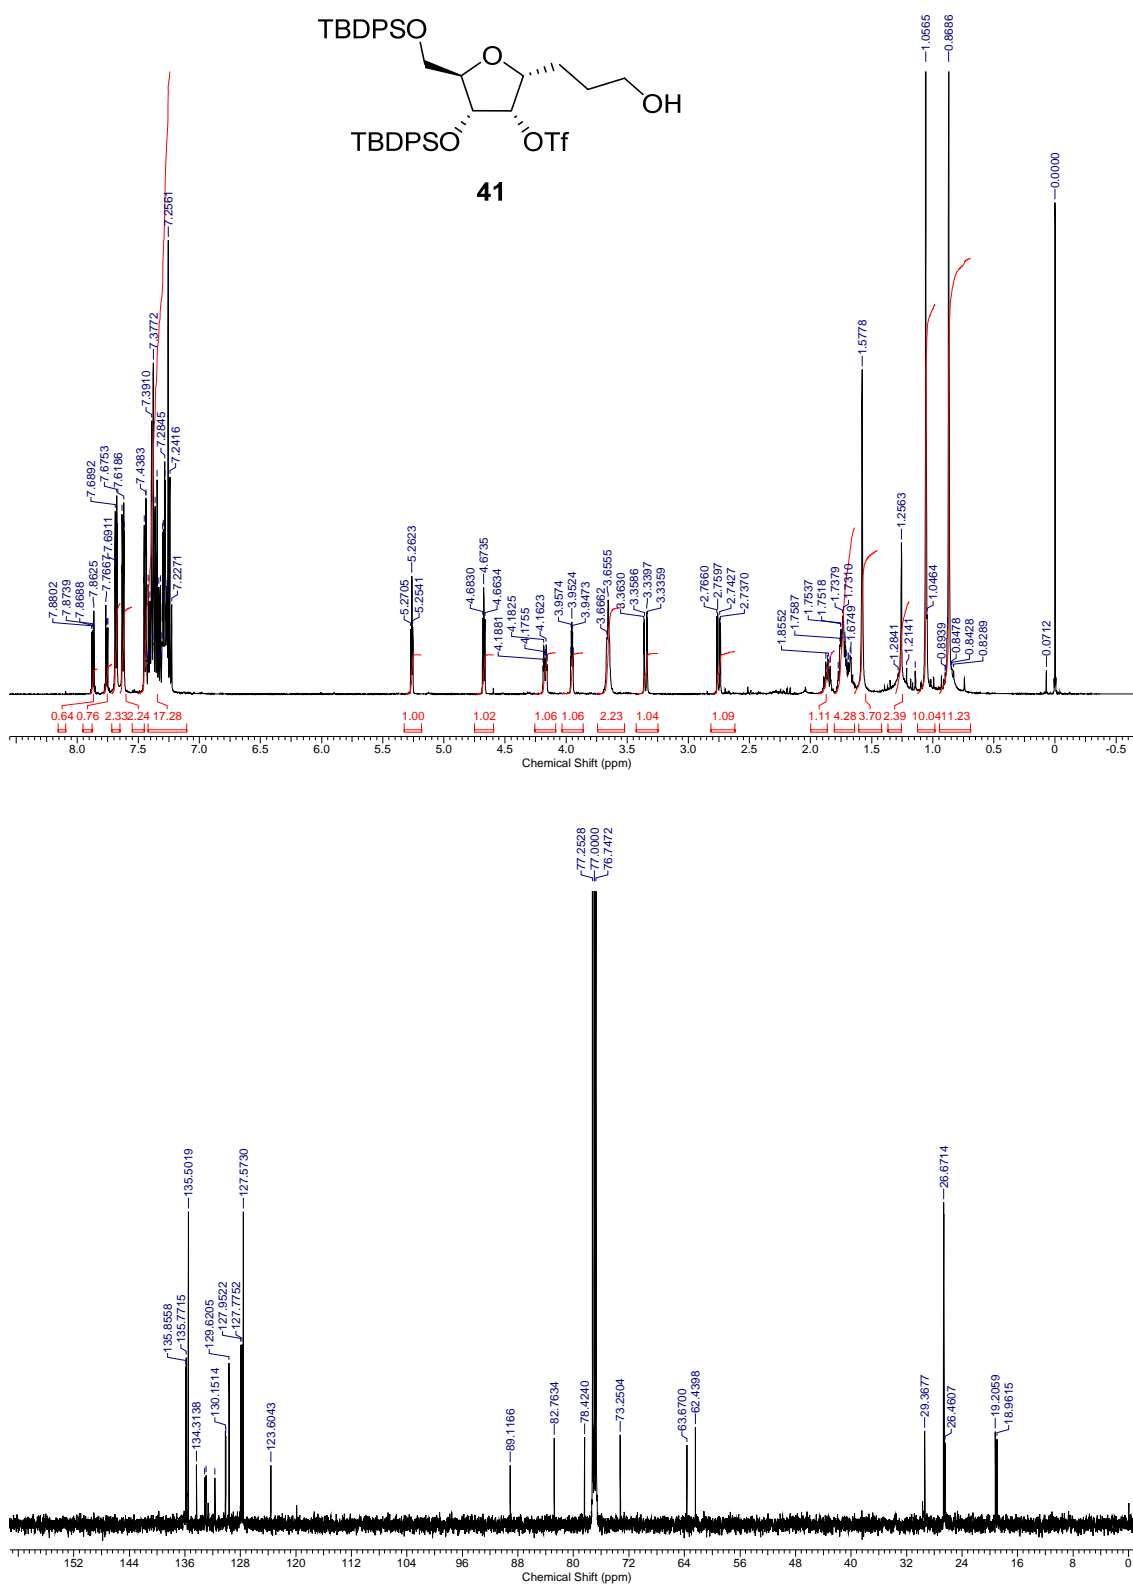

**Fig. S44.** <sup>1</sup>H NMR (500 MHz, CDCl<sub>3</sub>) and <sup>13</sup>C{<sup>1</sup>H} NMR (125.7 MHz, CDCl<sub>3</sub>) of compound **41**.

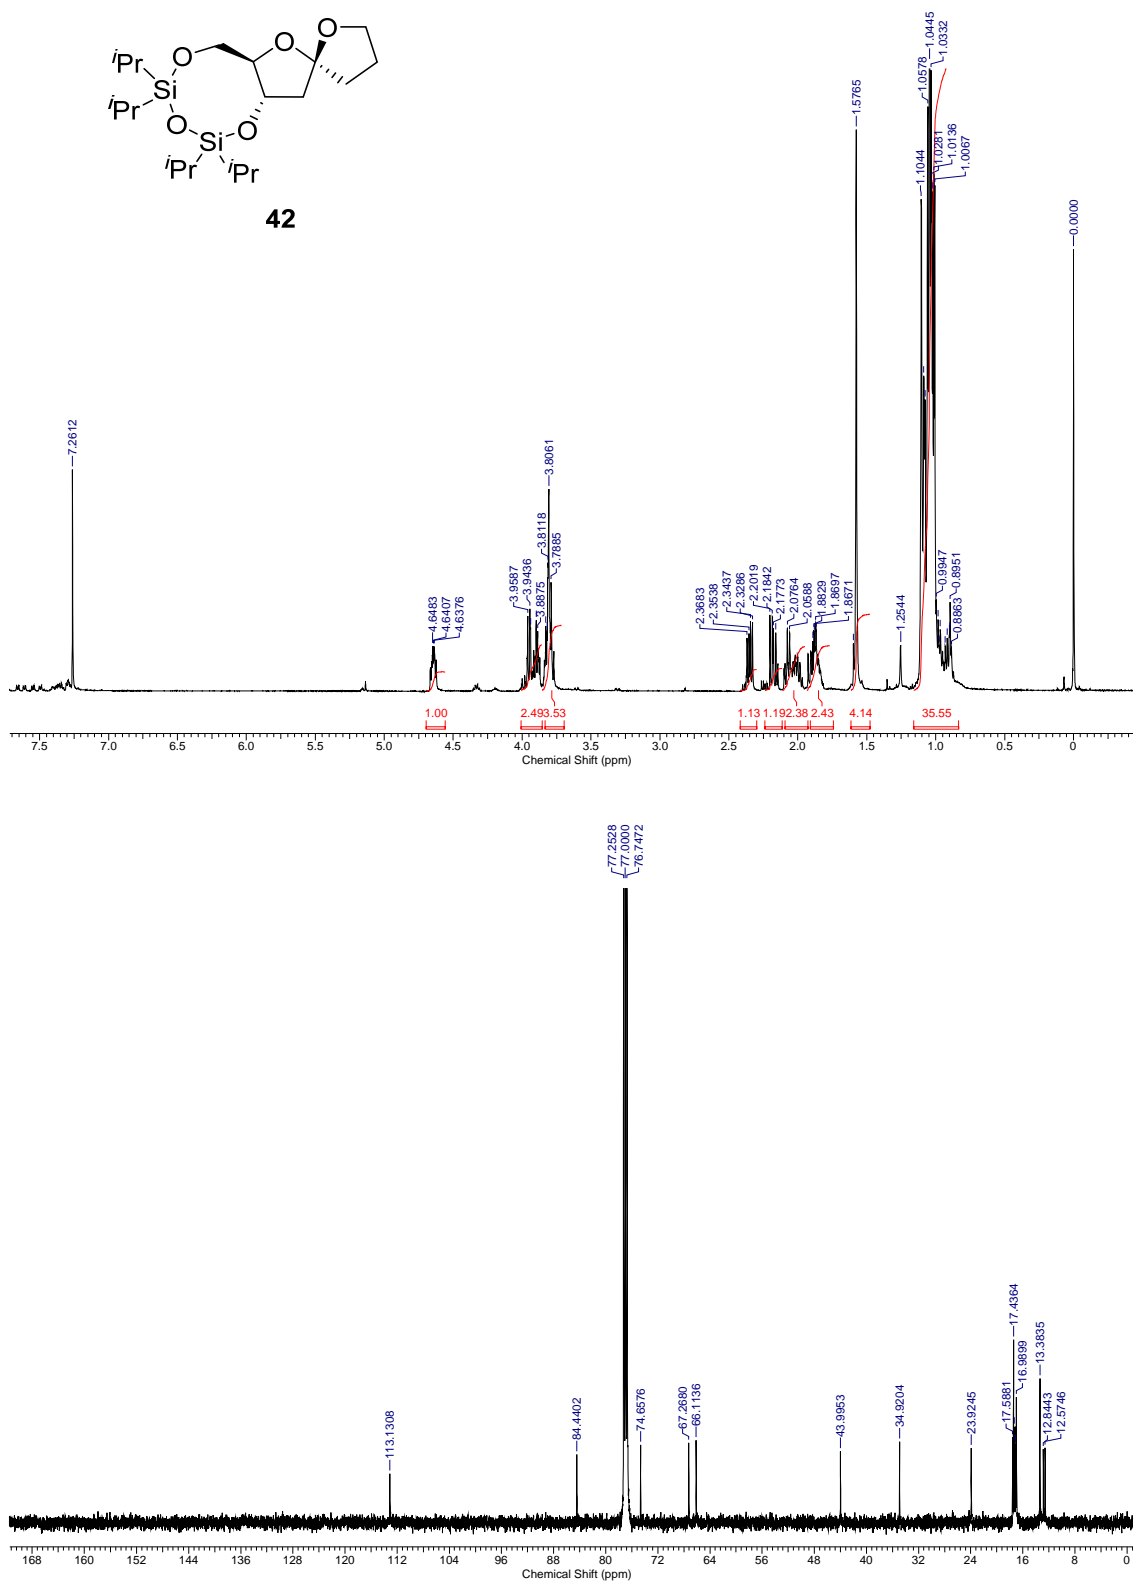

**Fig. S45.** <sup>1</sup>H NMR (500 MHz, CDCl<sub>3</sub>) and <sup>13</sup>C{<sup>1</sup>H} NMR (125.7 MHz, CDCl<sub>3</sub>) of compound **42**.

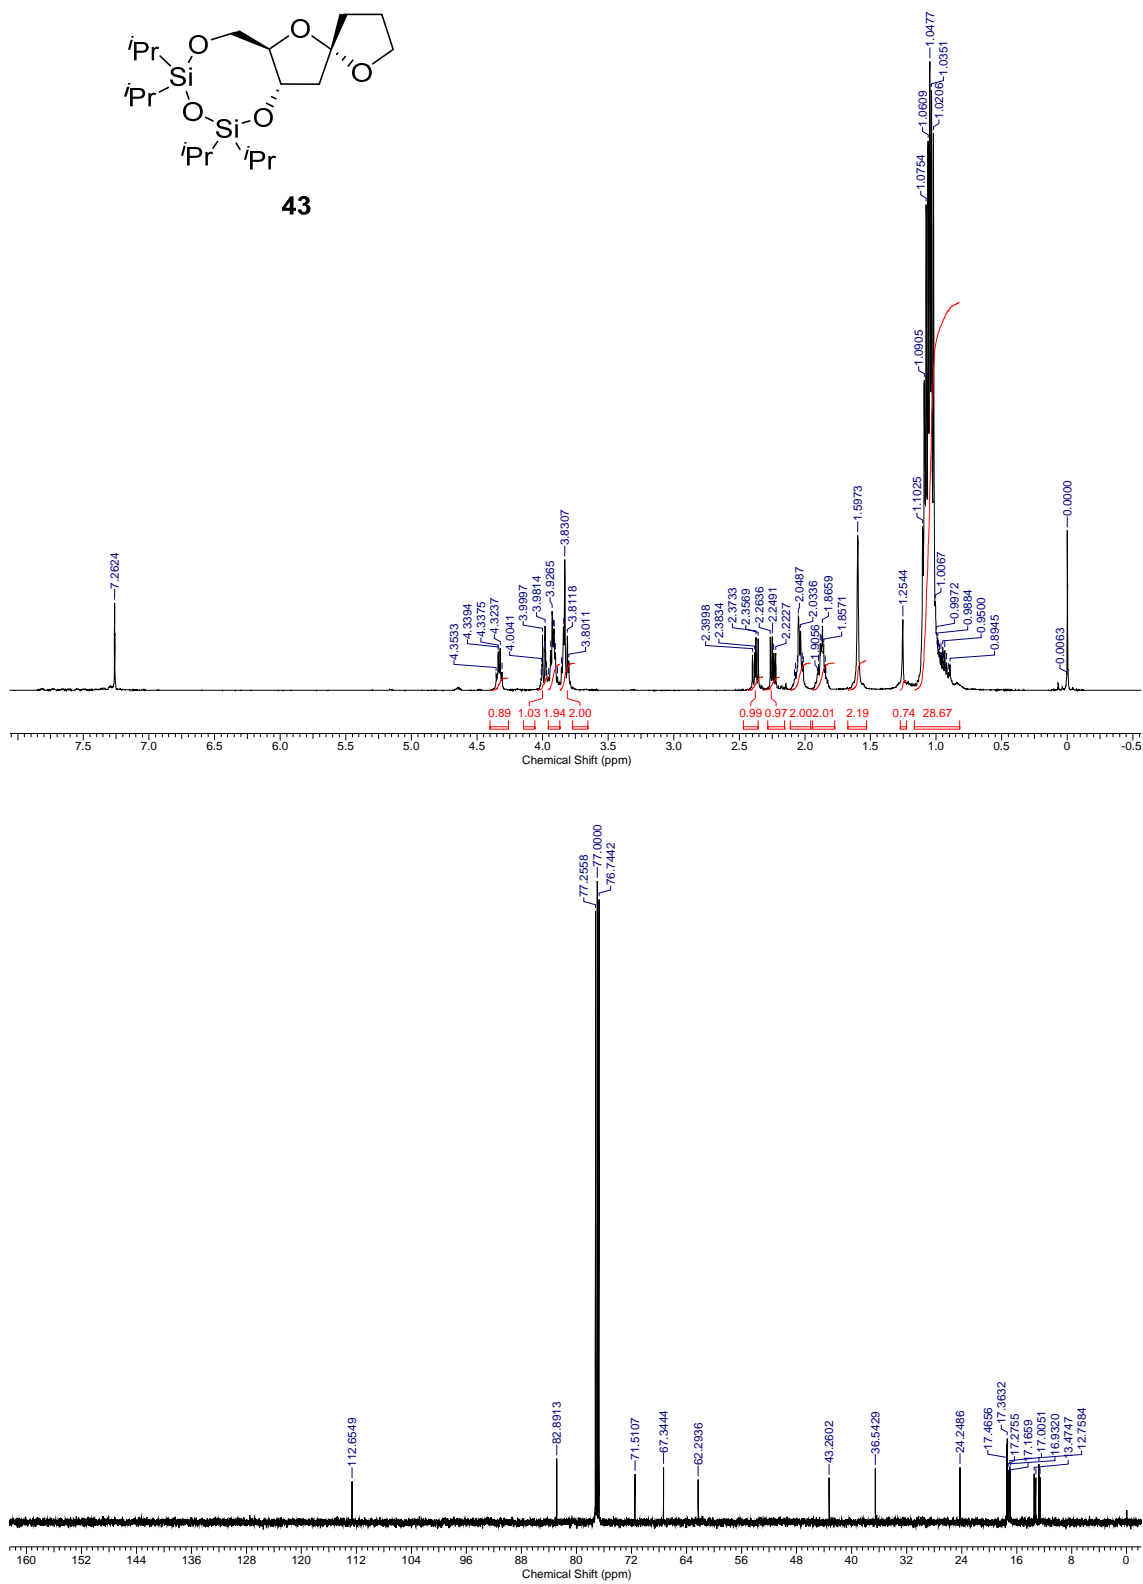

**Fig. S46.** <sup>1</sup>H NMR (500 MHz, CDCl<sub>3</sub>) and <sup>13</sup>C{<sup>1</sup>H} NMR (125.7 MHz, CDCl<sub>3</sub>) of compound **43**.

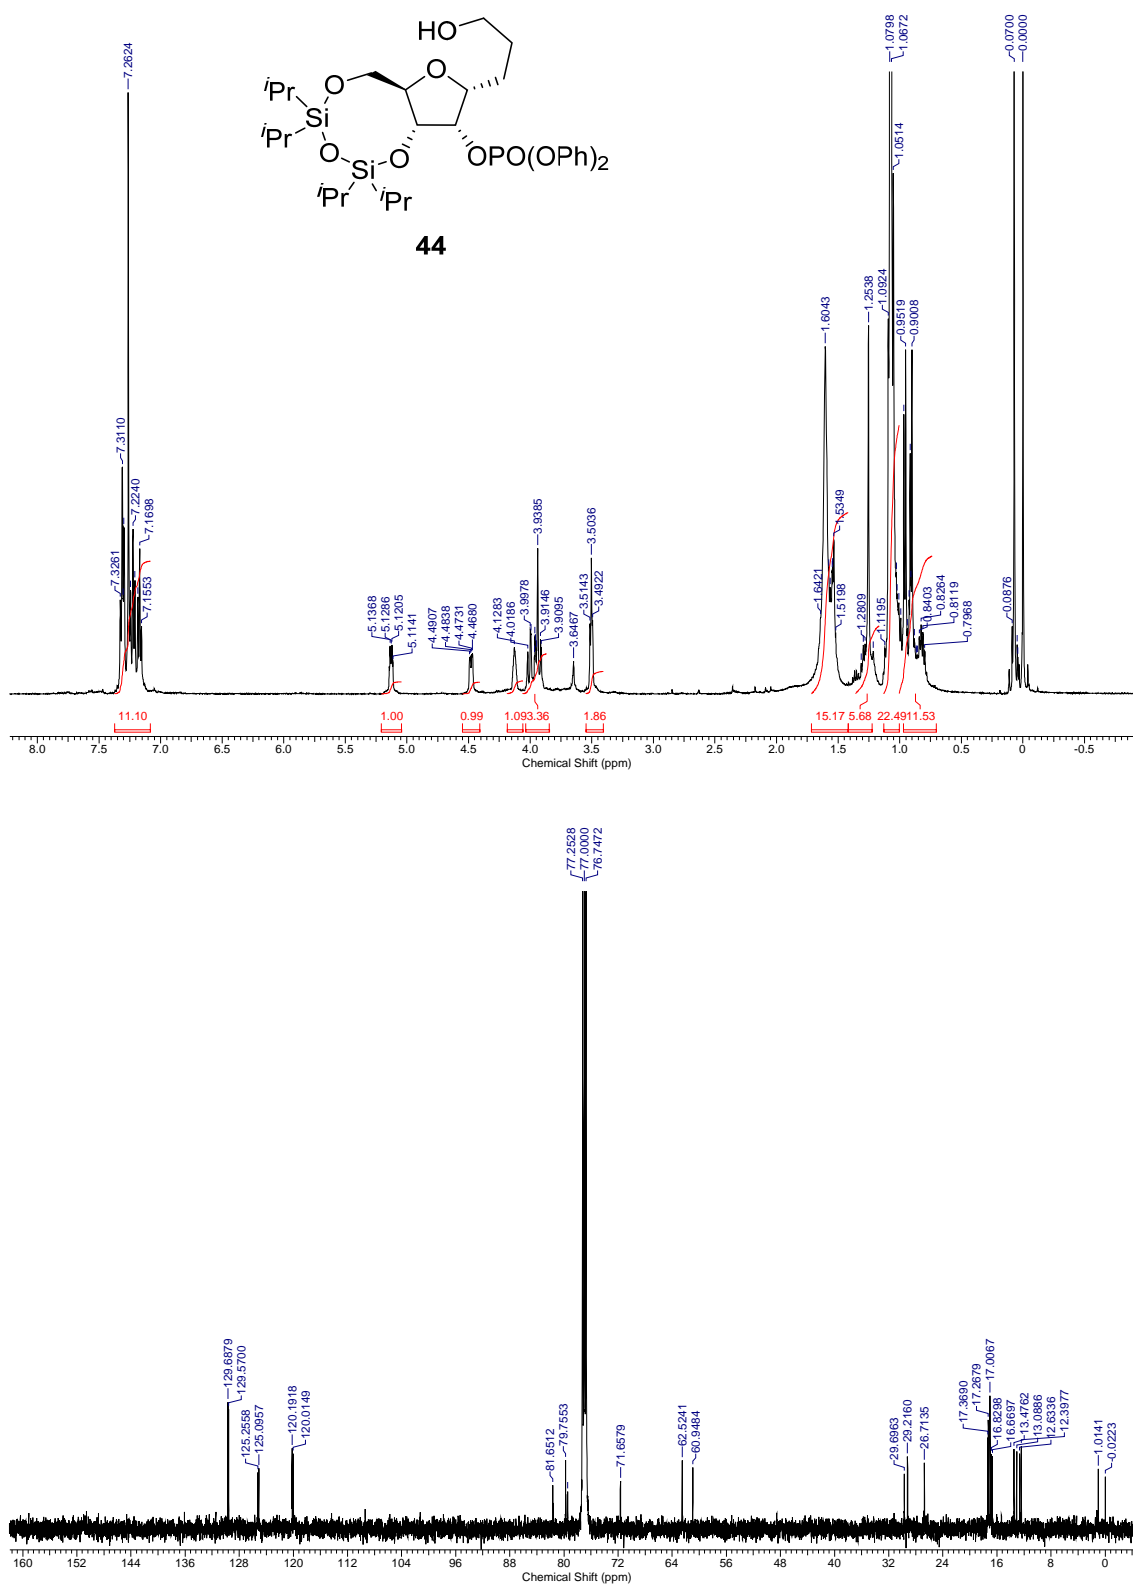

**Fig. S47.** <sup>1</sup>H NMR (500 MHz, CDCl<sub>3</sub>) and <sup>13</sup>C{<sup>1</sup>H} NMR (125.7 MHz, CDCl<sub>3</sub>) of compound **44**.

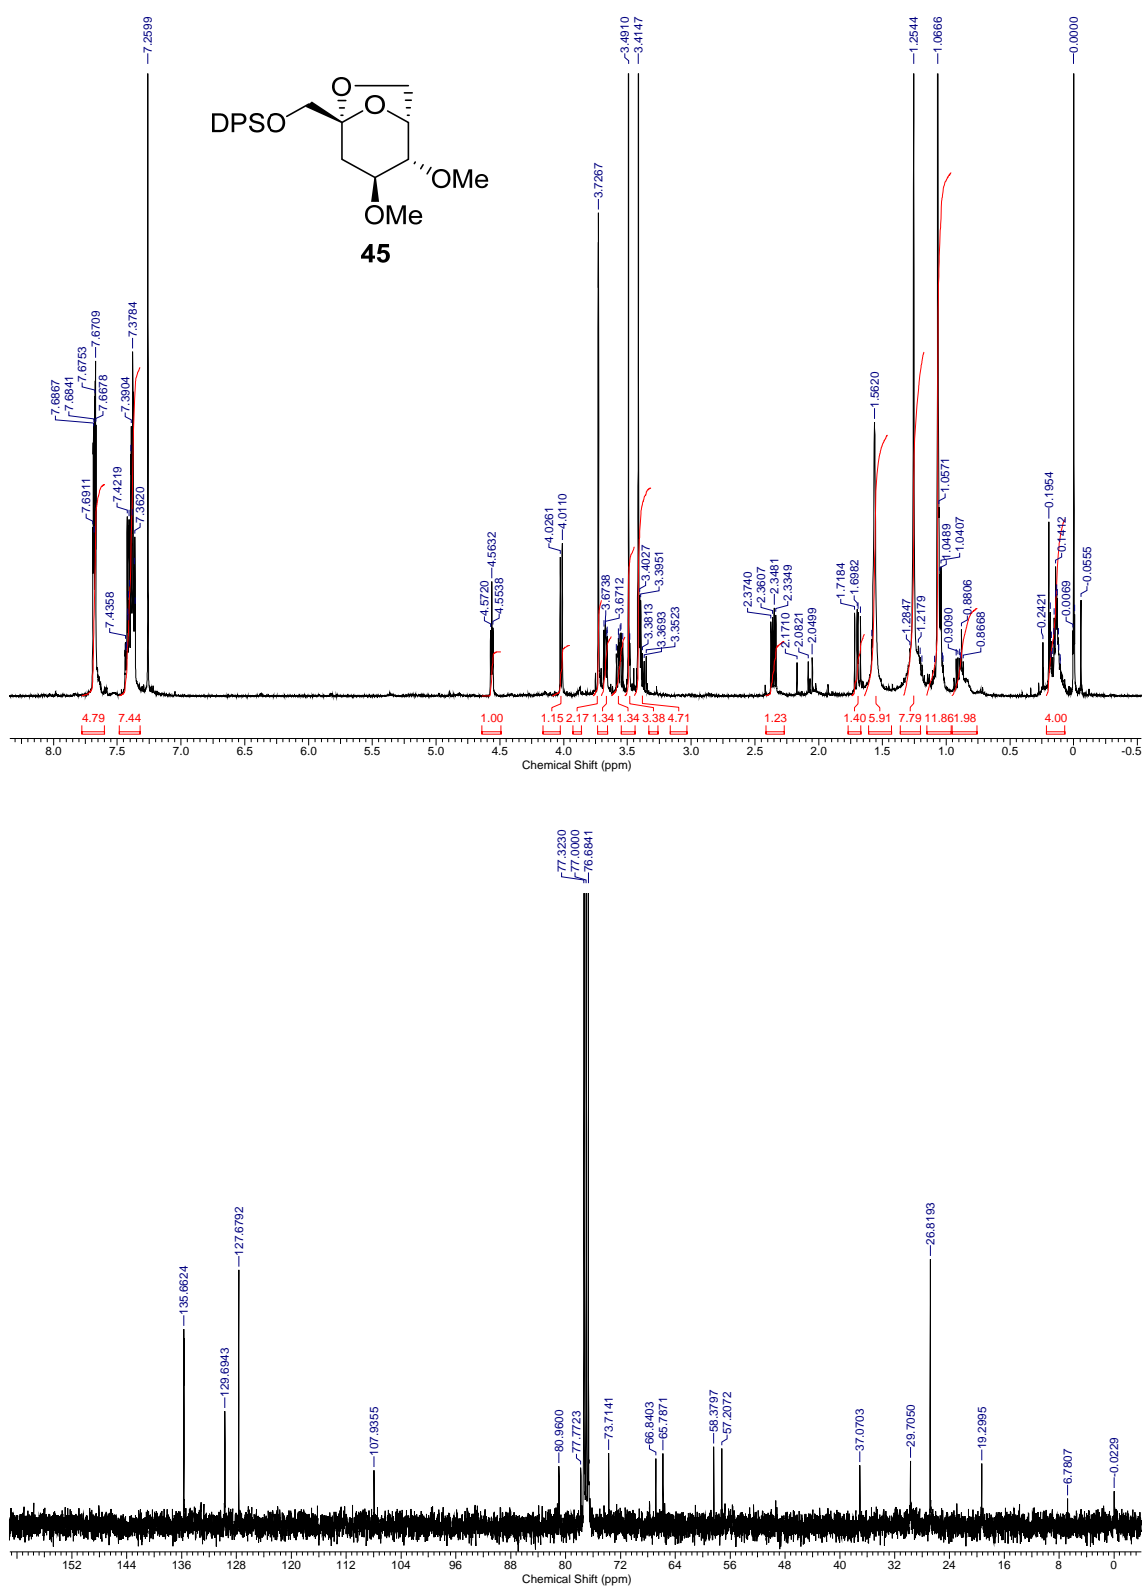

**Fig. S48.** <sup>1</sup>H NMR (500 MHz, CDCl<sub>3</sub>) and <sup>13</sup>C{<sup>1</sup>H} NMR (100.6 MHz, CDCl<sub>3</sub>) of compound **45**.

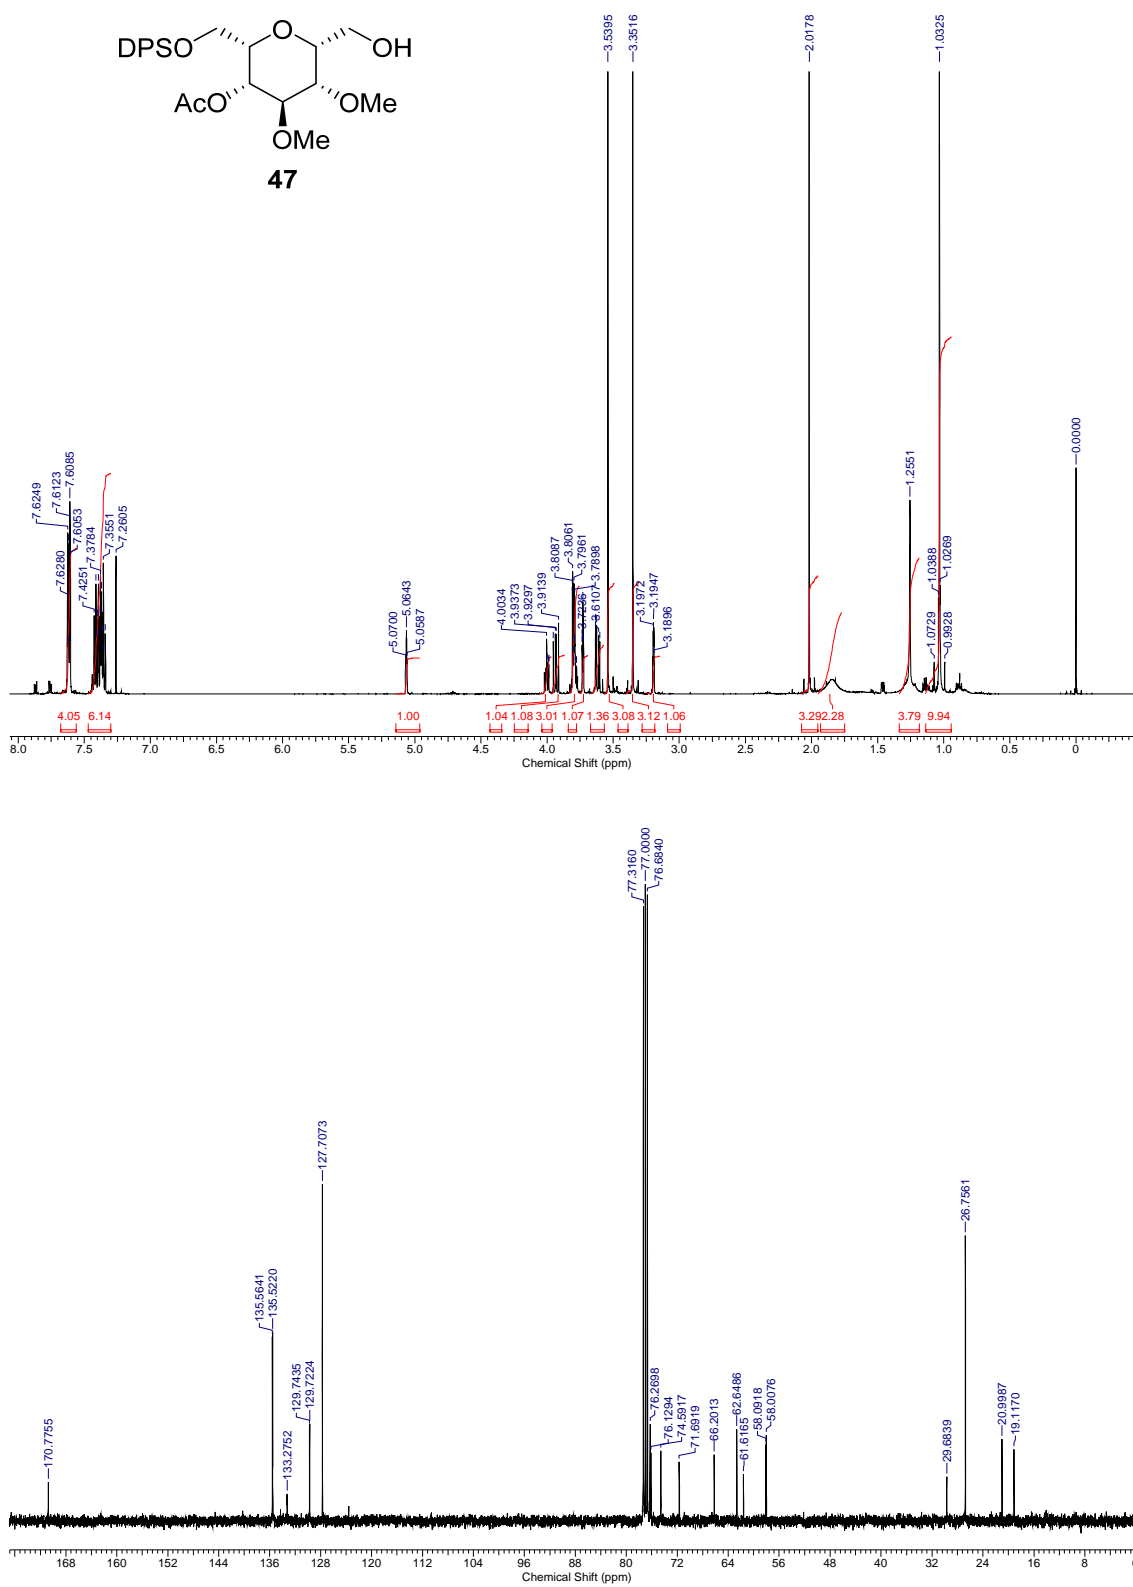

**Fig. S49.** <sup>1</sup>H NMR (500 MHz, CDCl<sub>3</sub>) and <sup>13</sup>C{<sup>1</sup>H} NMR (100.6 MHz, CDCl<sub>3</sub>) of compound **47**.

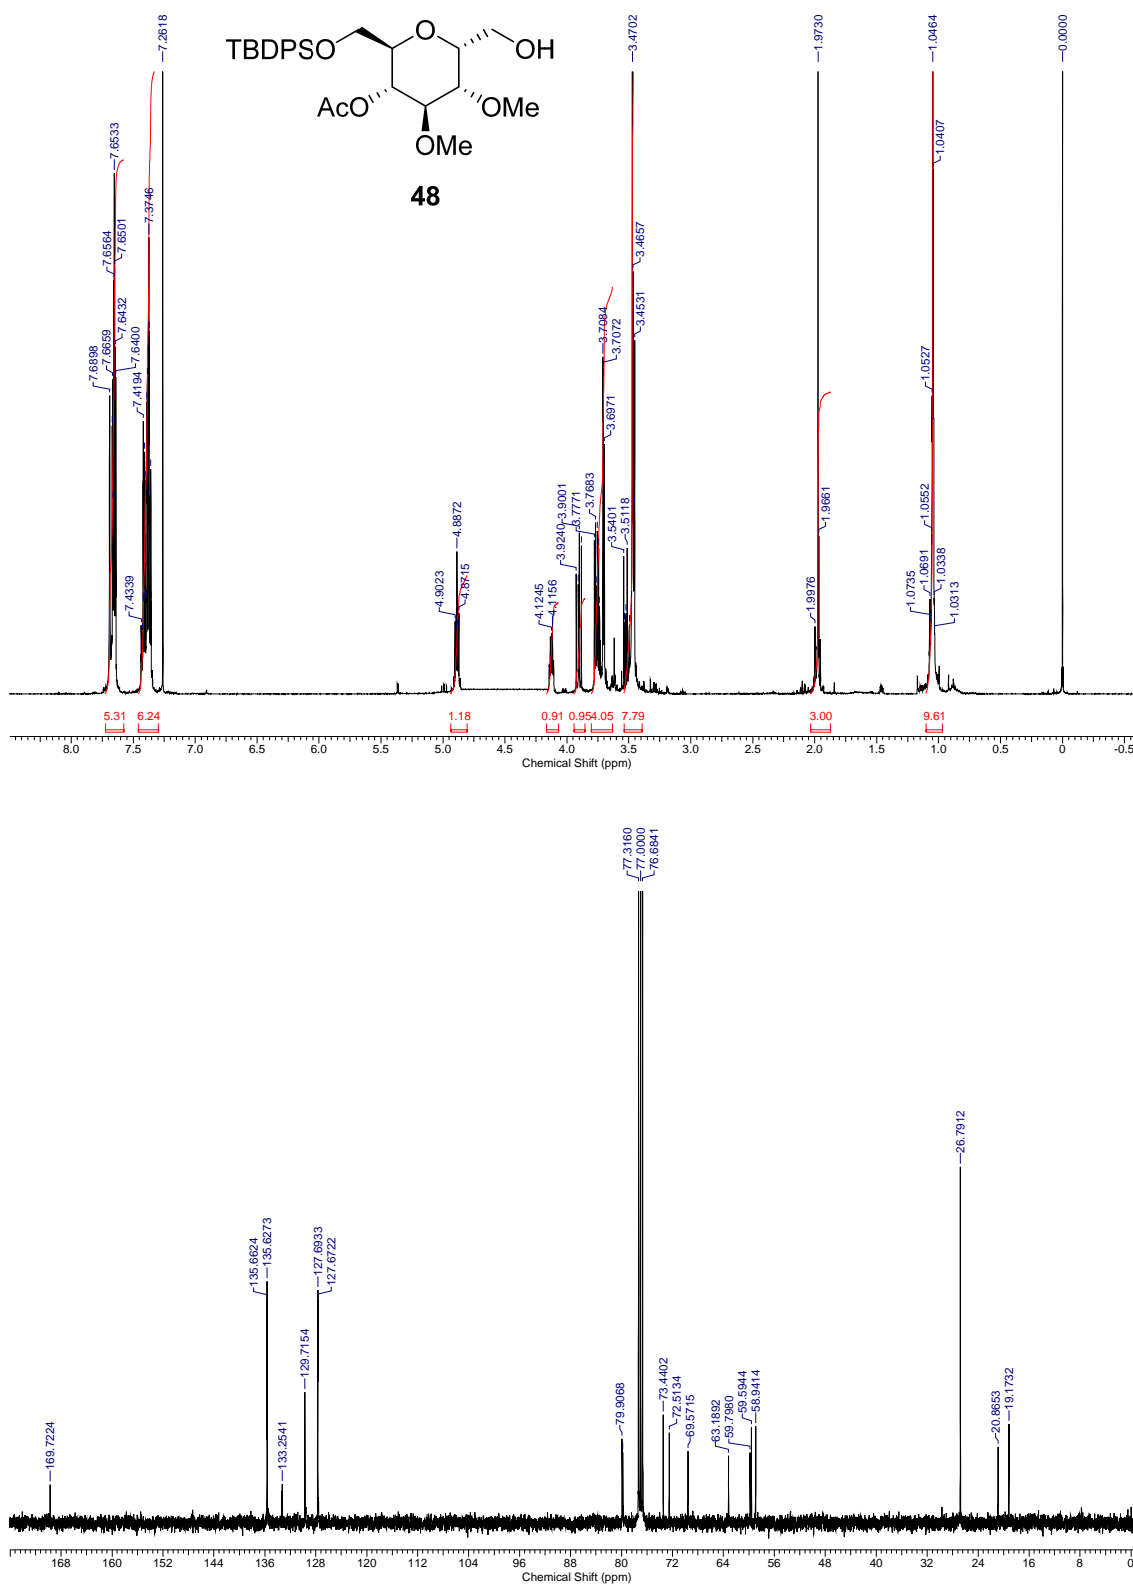

**Fig. S50.** <sup>1</sup>H NMR (500 MHz, CDCl<sub>3</sub>) and <sup>13</sup>C{<sup>1</sup>H} NMR (100.6 MHz, CDCl<sub>3</sub>) of compound **48**.



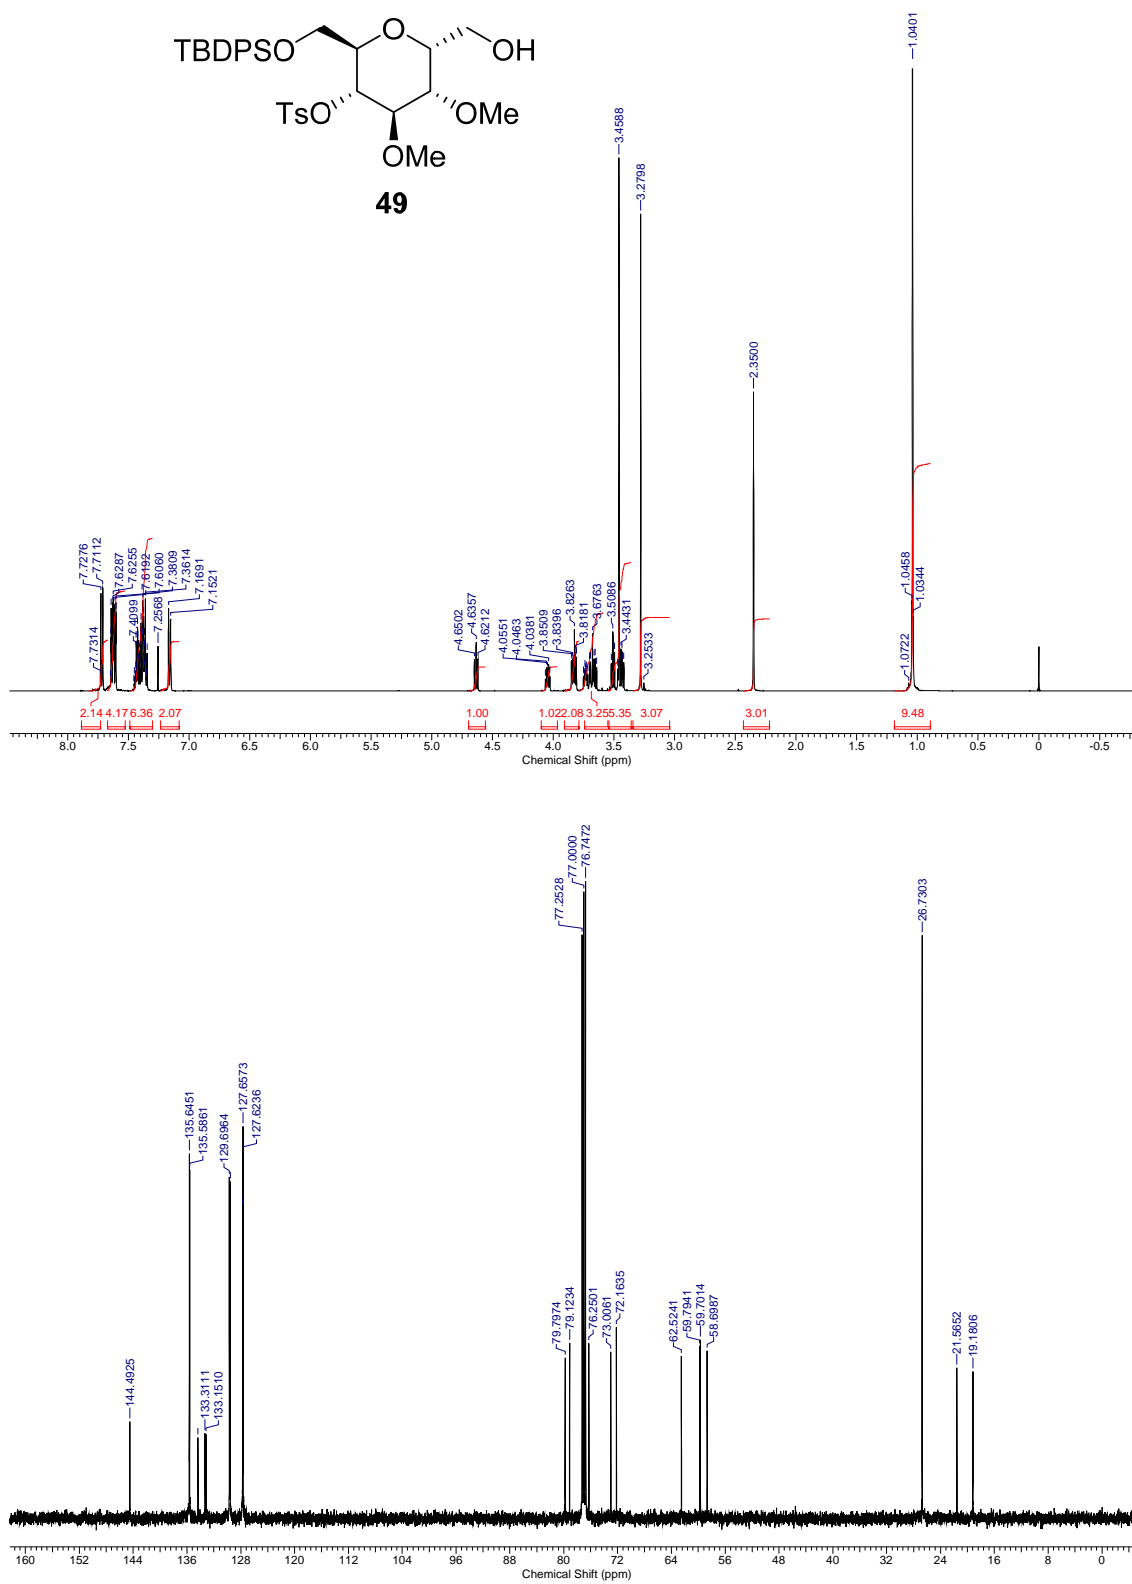

**Fig. S51.** <sup>1</sup>H NMR (500 MHz, CDCl<sub>3</sub>) and <sup>13</sup>C{<sup>1</sup>H} NMR (100.6 MHz, CDCl<sub>3</sub>) of compound **49**.

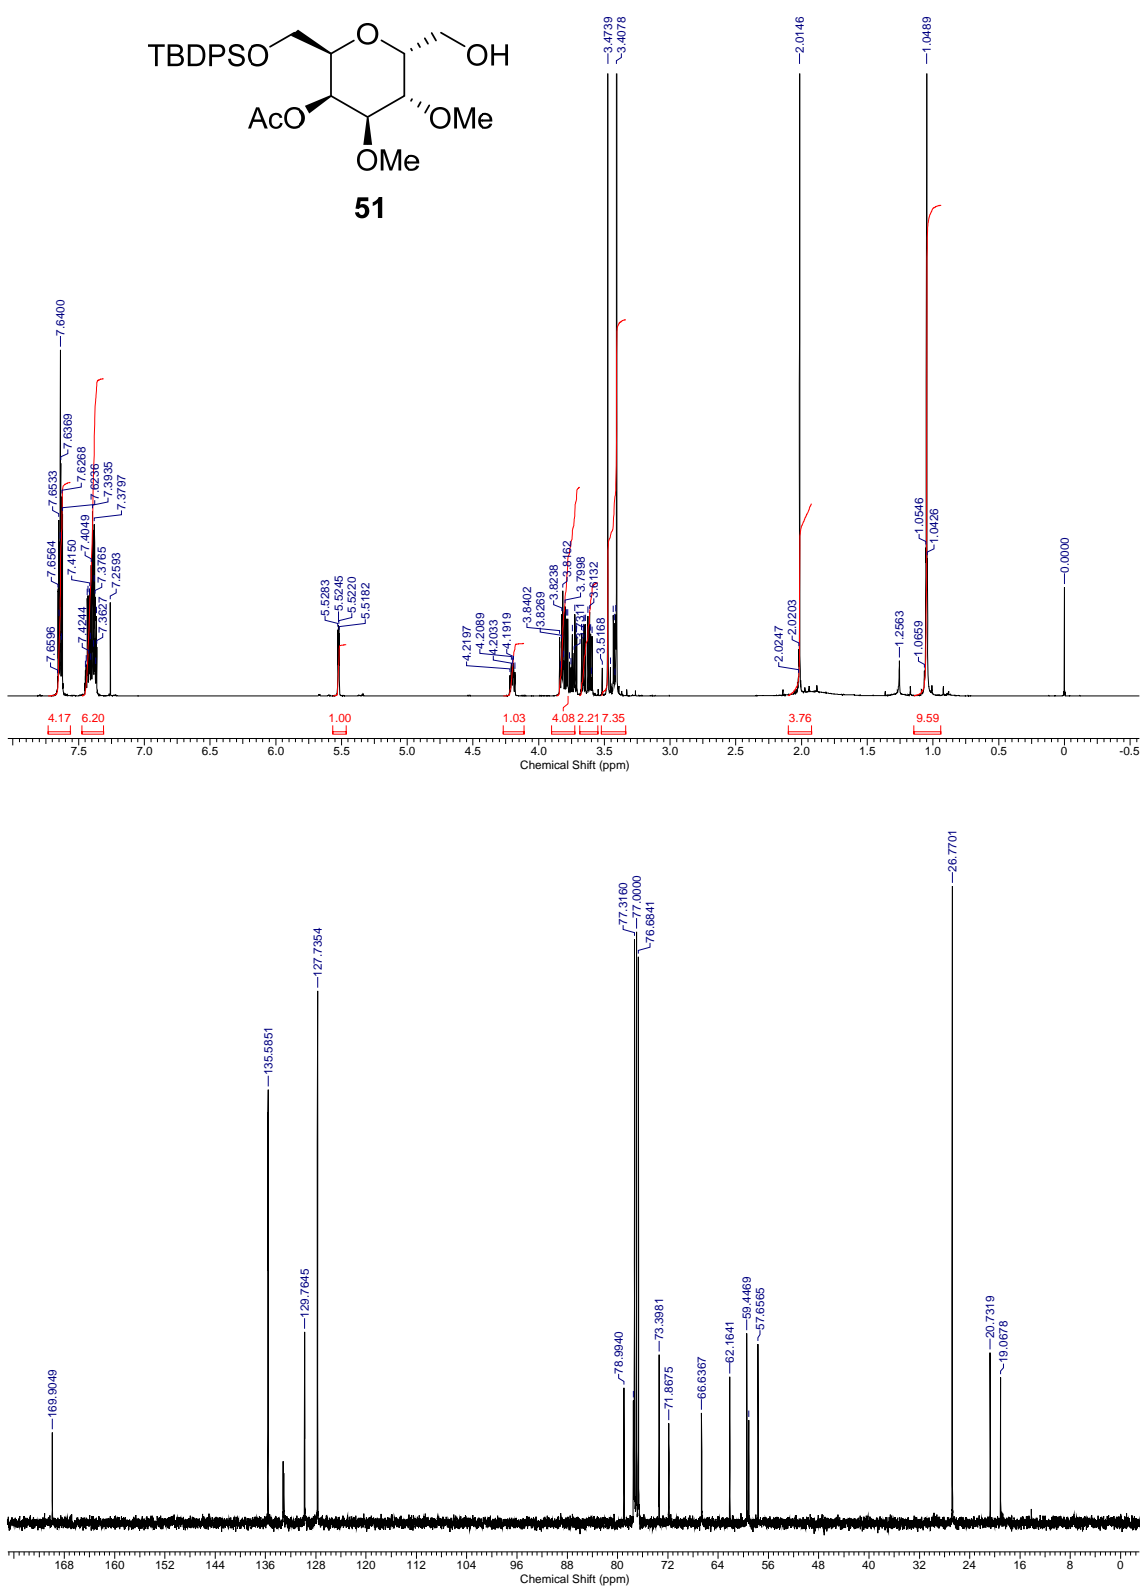

**Fig. S52.** <sup>1</sup>H NMR (500 MHz, CDCl<sub>3</sub>) and <sup>13</sup>C{<sup>1</sup>H} NMR (100.6 MHz, CDCl<sub>3</sub>) of compound **51**.

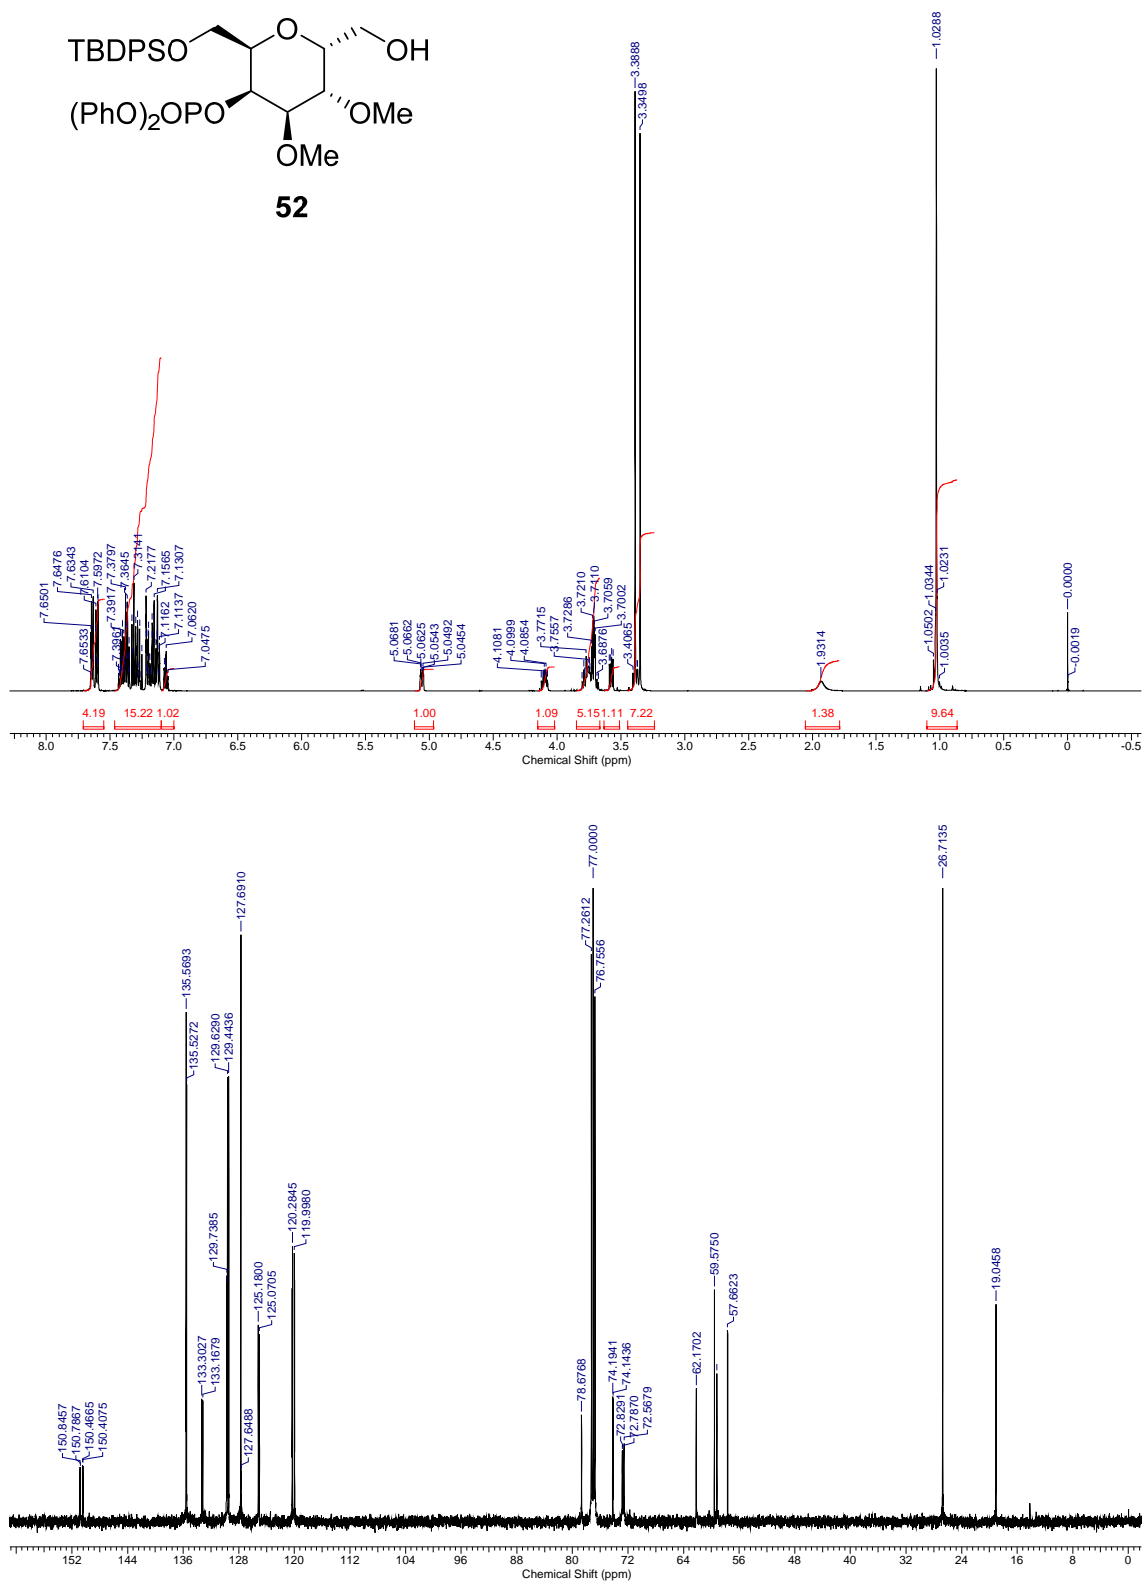

**Fig. S53.** <sup>1</sup>H NMR (500 MHz, CDCl<sub>3</sub>) and <sup>13</sup>C{<sup>1</sup>H} NMR (125.7 MHz, CDCl<sub>3</sub>) of compound **52**.

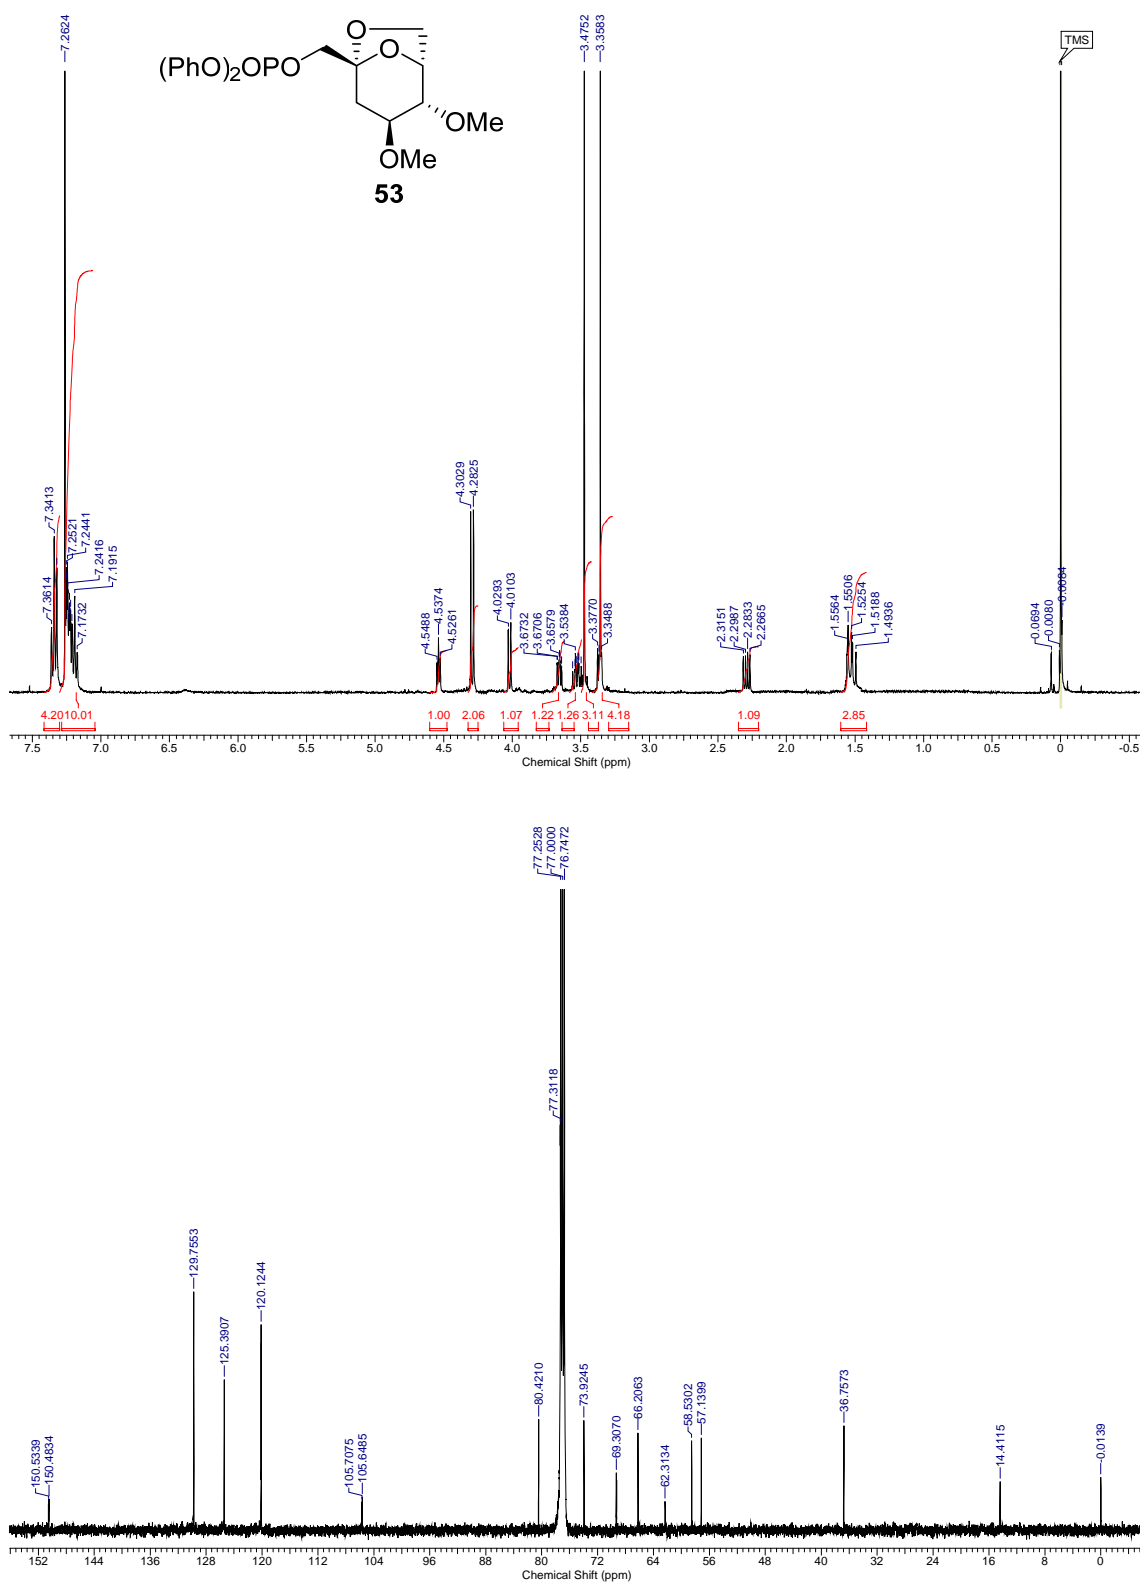

**Fig. S54.** <sup>1</sup>H NMR (500 MHz, CDCl<sub>3</sub>) and <sup>13</sup>C{<sup>1</sup>H} NMR (125.7 MHz, CDCl<sub>3</sub>) of compound **53**.

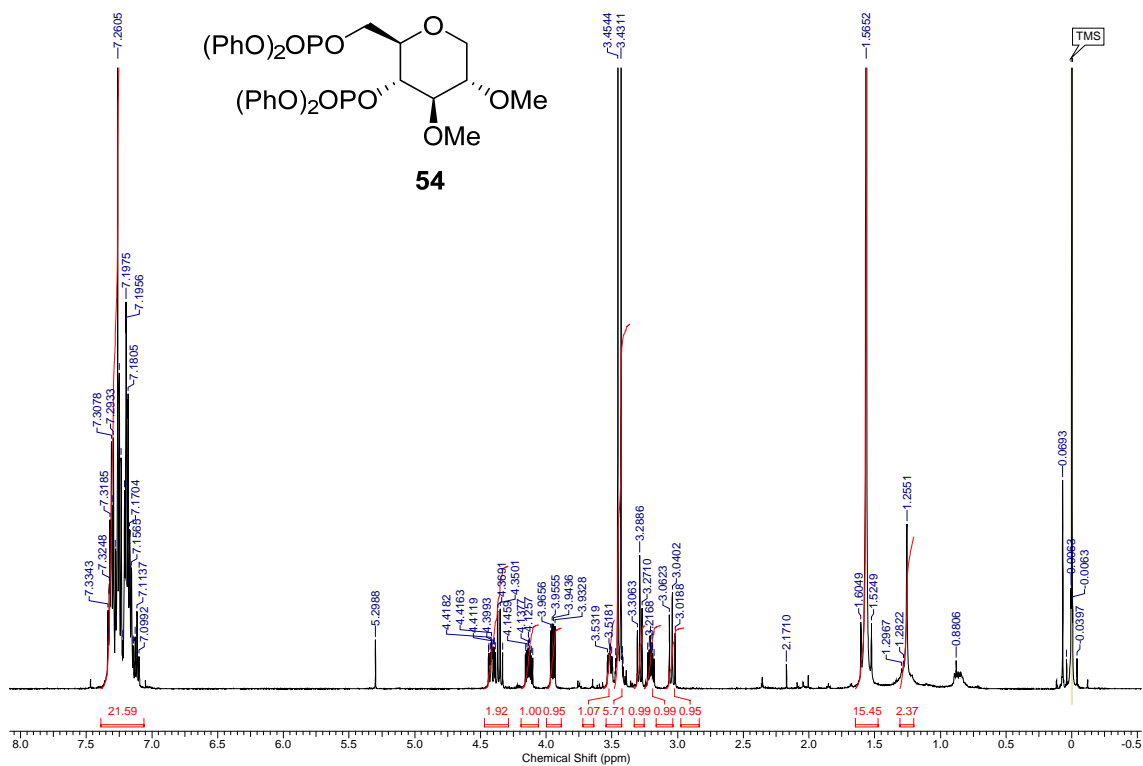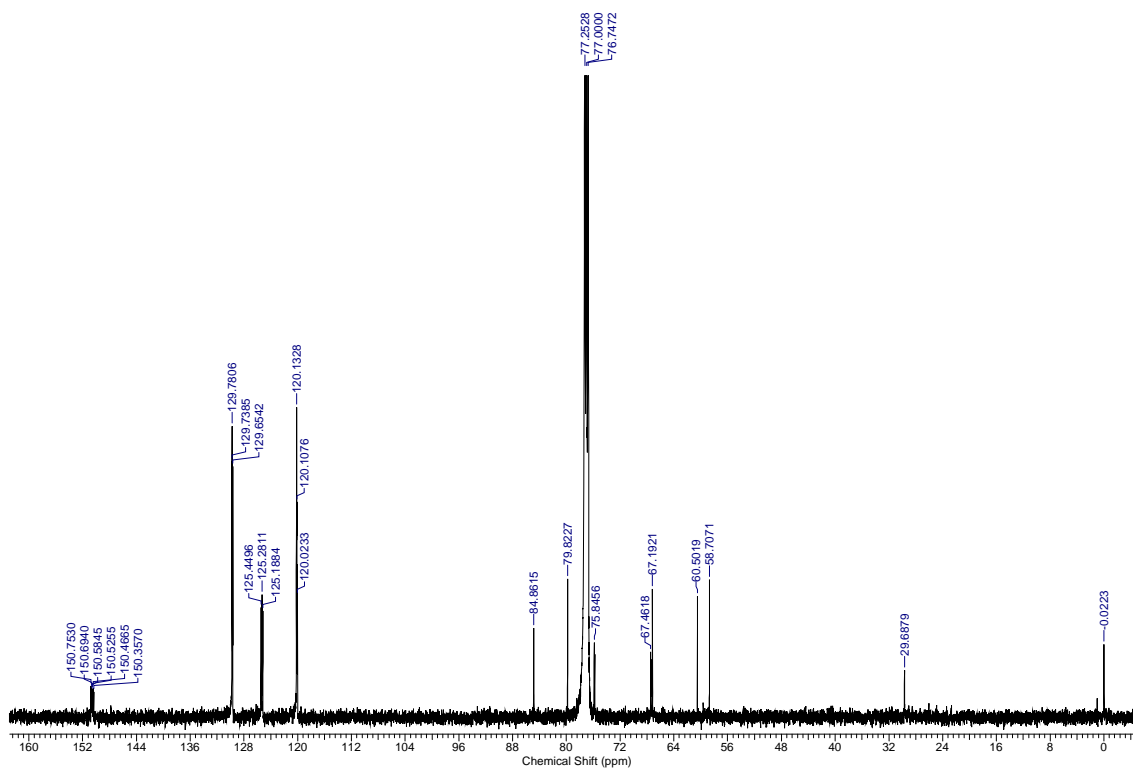

**Fig. S55.**  $^1\text{H}$  NMR (500 MHz,  $\text{CDCl}_3$ ) and  $^{13}\text{C}\{^1\text{H}\}$  NMR (125.7 MHz,  $\text{CDCl}_3$ ) of compound **54**.

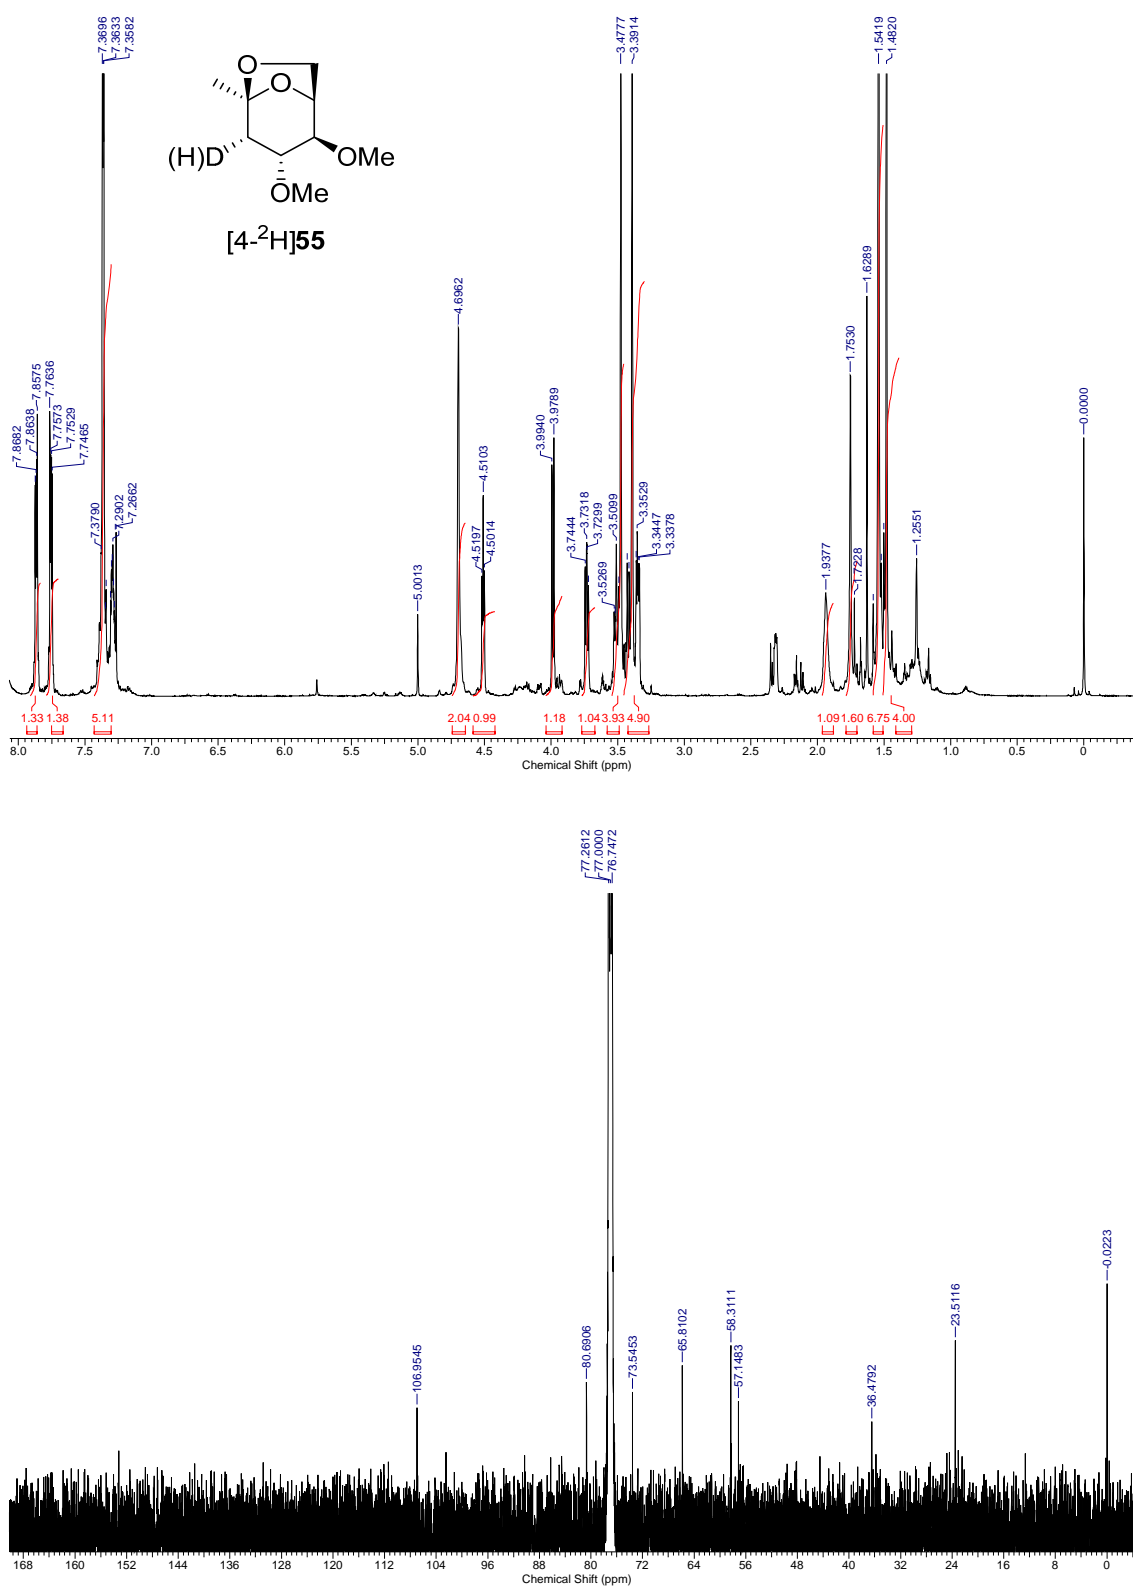

**Fig. S56.** <sup>1</sup>H NMR (500 MHz, CDCl<sub>3</sub>) and <sup>13</sup>C{<sup>1</sup>H} NMR (125.7 MHz, CDCl<sub>3</sub>) of compound [4-<sup>2</sup>H]55.

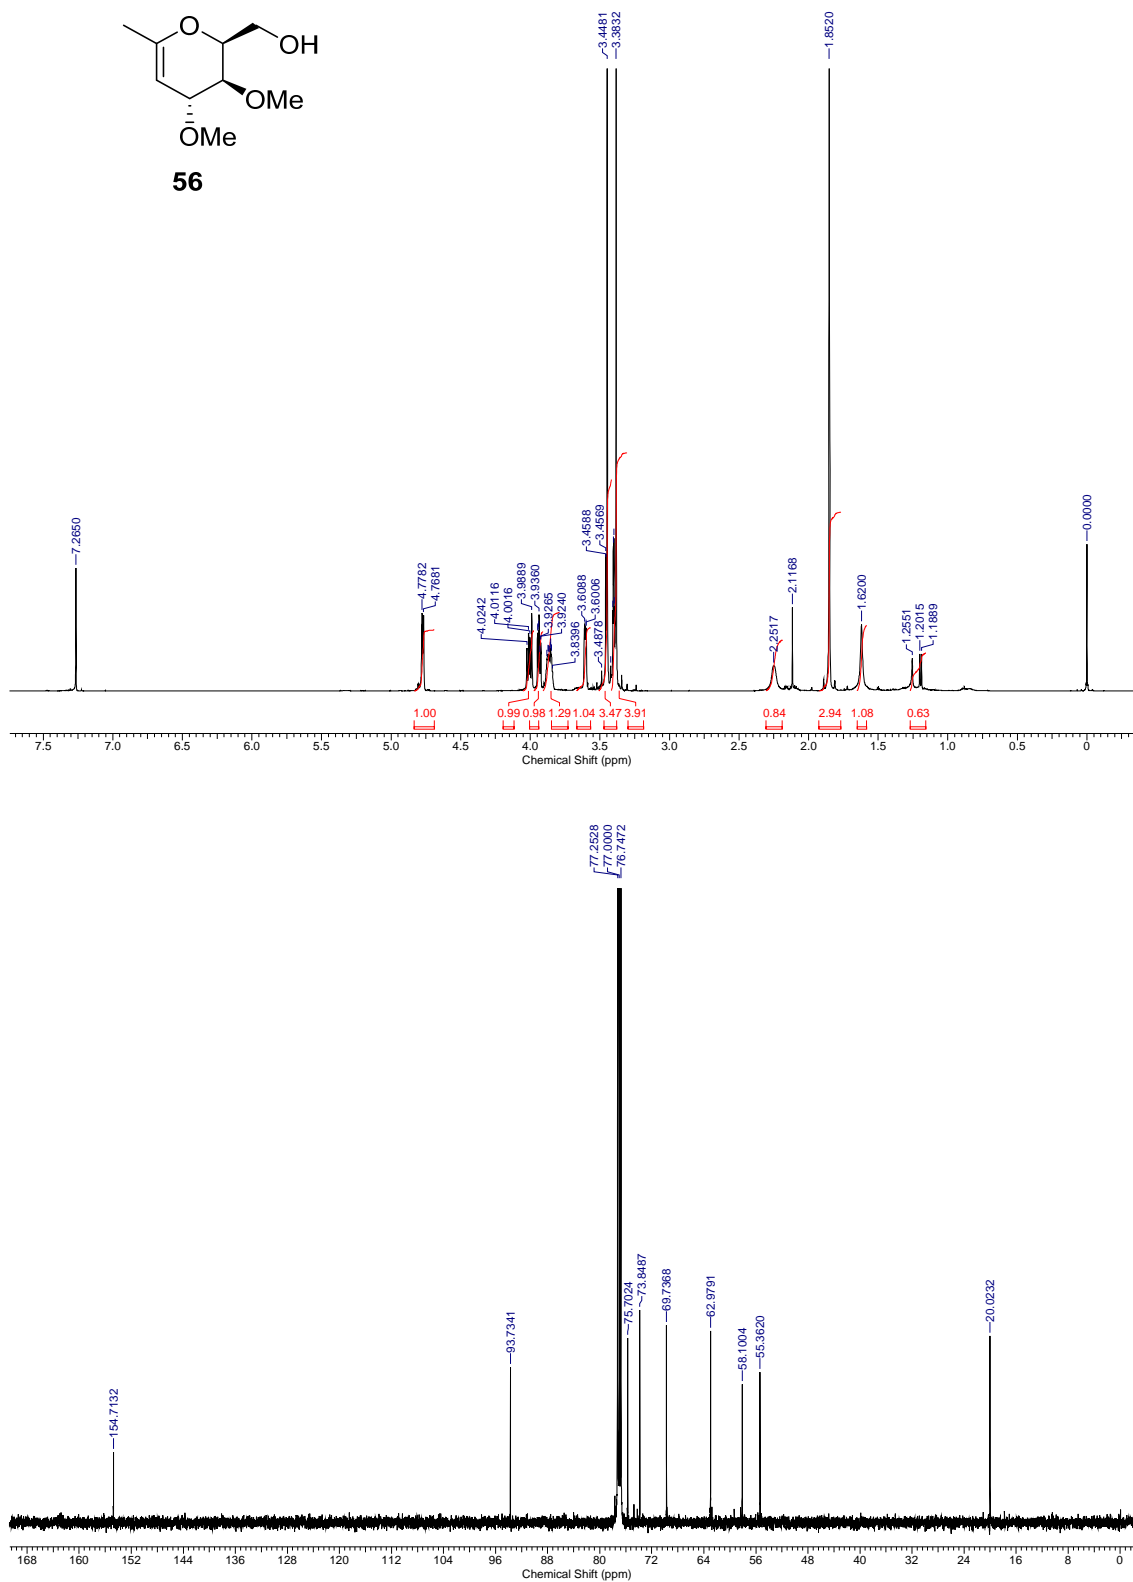

**Fig. S57.**  $^1\text{H}$  NMR (500 MHz,  $\text{CDCl}_3$ ) and  $^{13}\text{C}\{^1\text{H}\}$  NMR (125.7 MHz,  $\text{CDCl}_3$ ) of compound **56**.

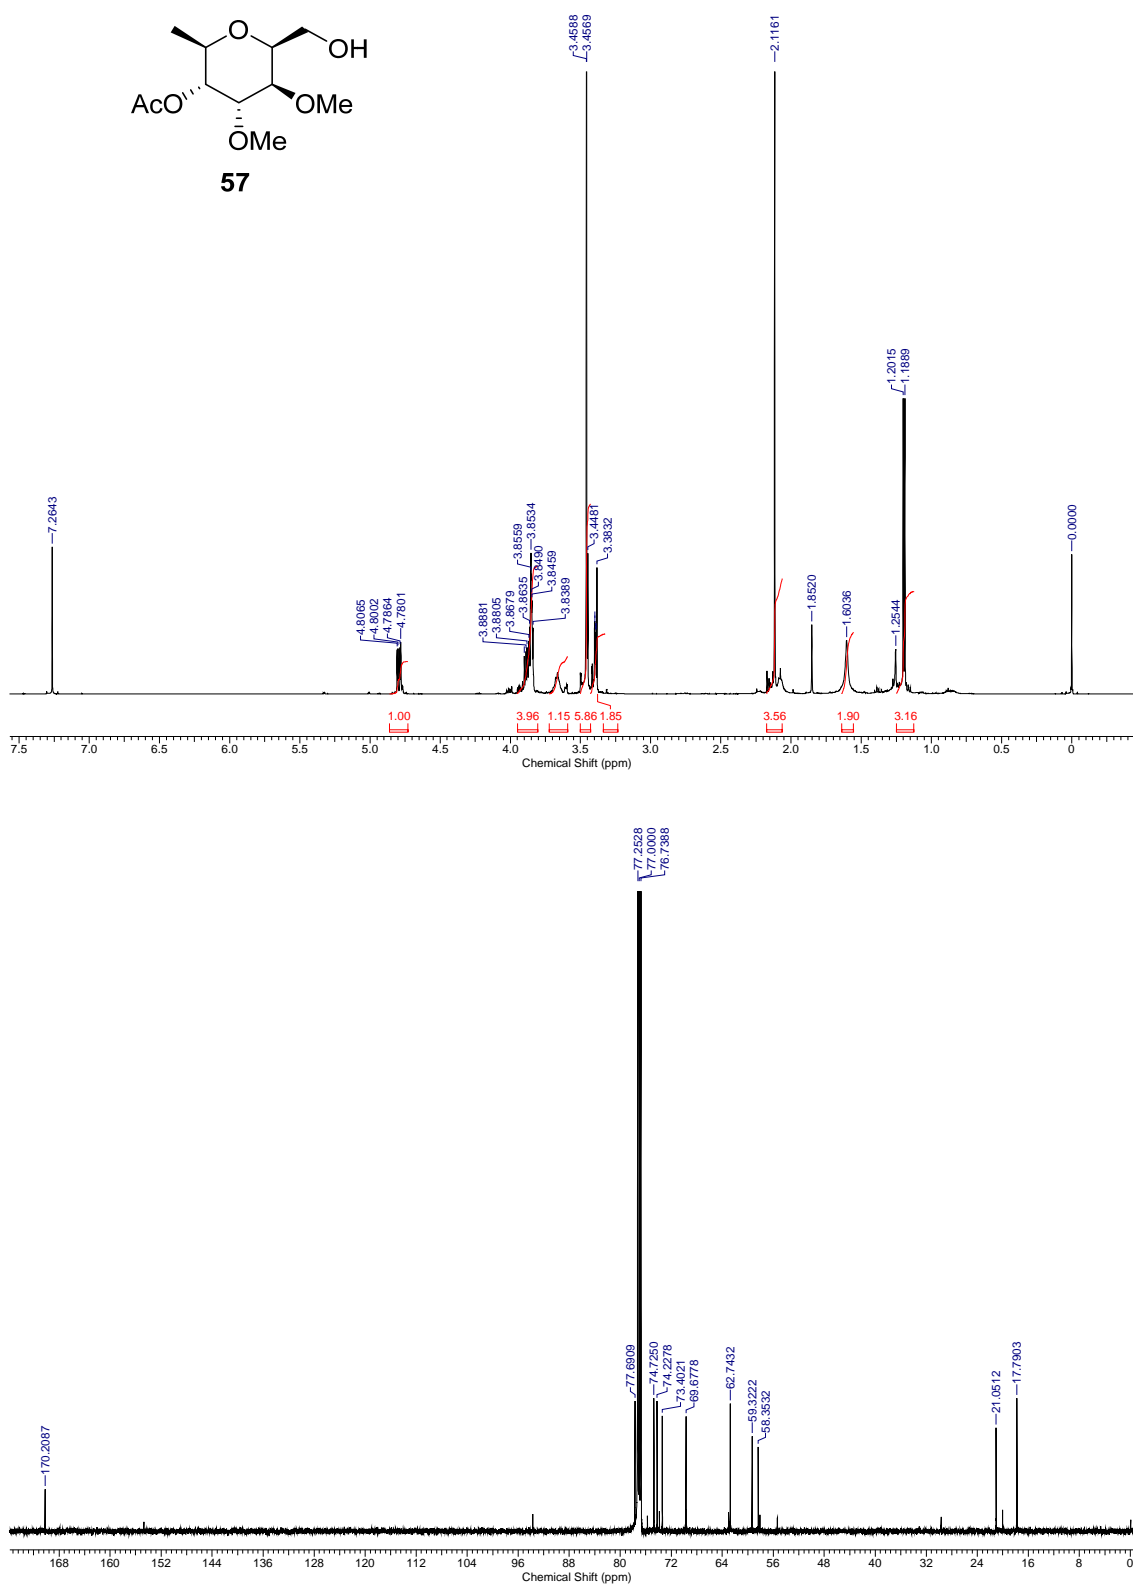

**Fig. S58.** <sup>1</sup>H NMR (500 MHz, CDCl<sub>3</sub>) and <sup>13</sup>C{<sup>1</sup>H} NMR (125.7 MHz, CDCl<sub>3</sub>) of compound **57**.



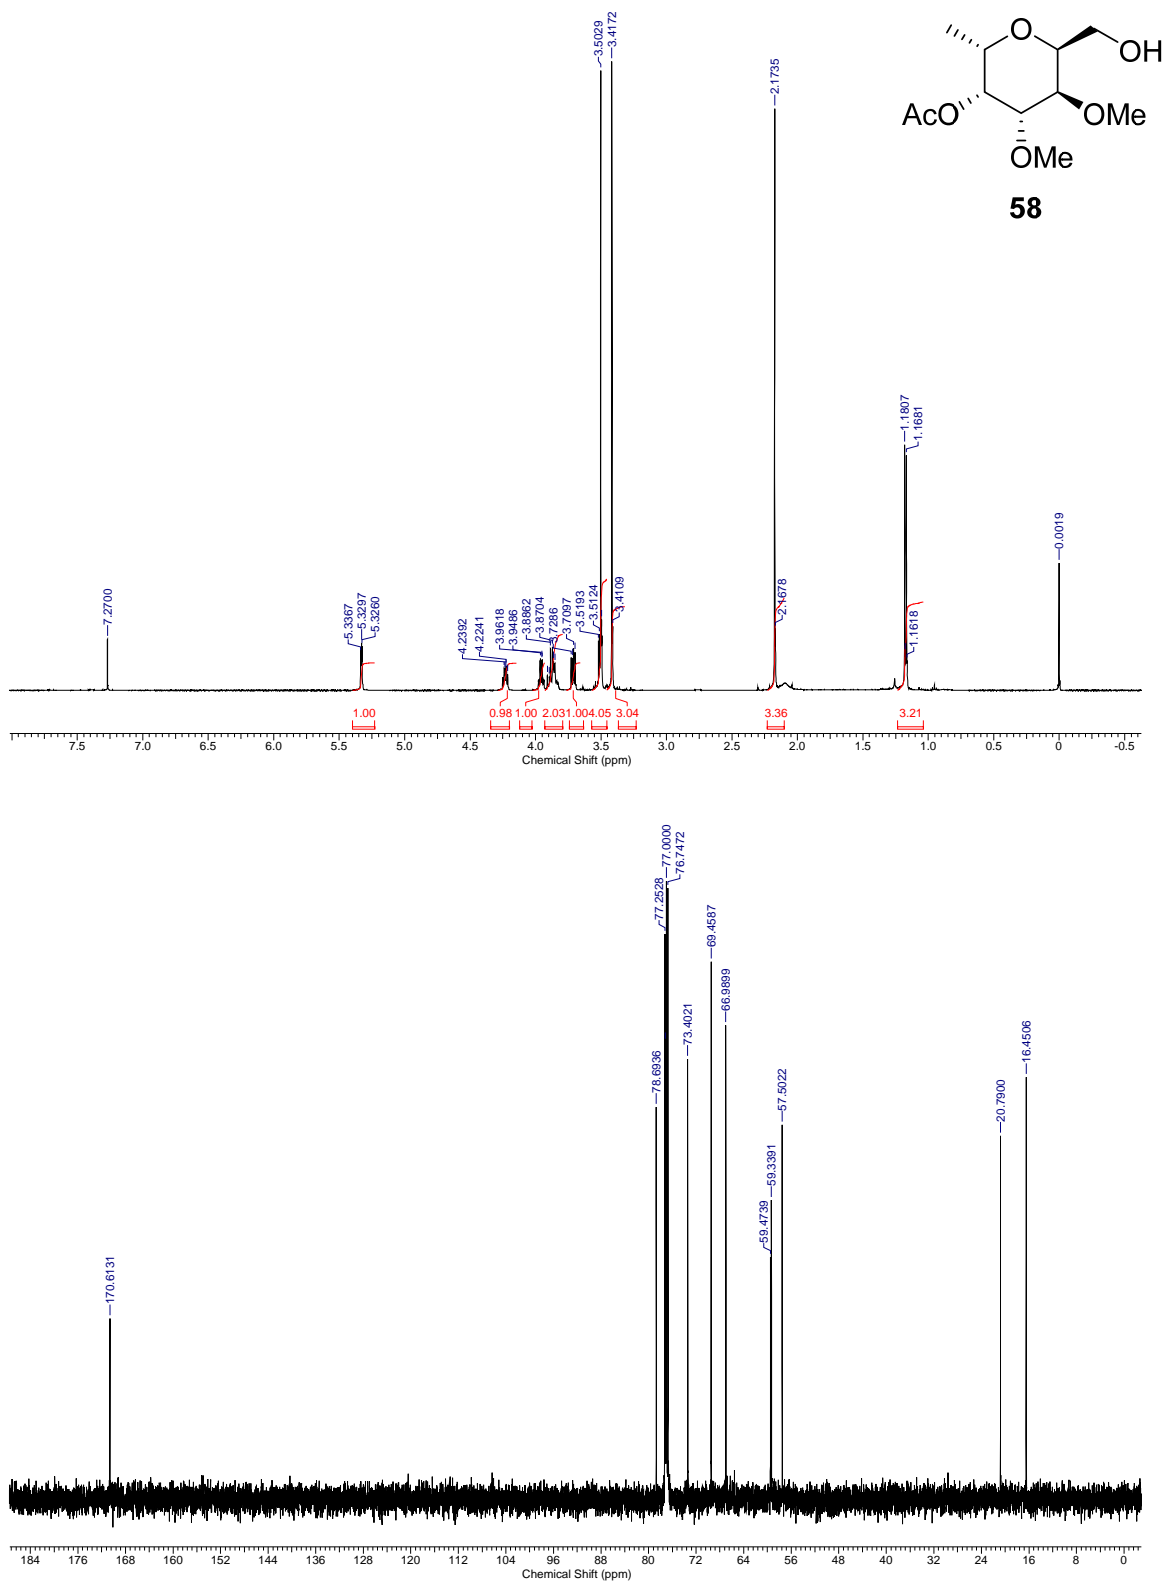

**Fig. S59.** <sup>1</sup>H NMR (500 MHz, CDCl<sub>3</sub>) and <sup>13</sup>C{<sup>1</sup>H} NMR (125.7 MHz, CDCl<sub>3</sub>) of compound **58**.

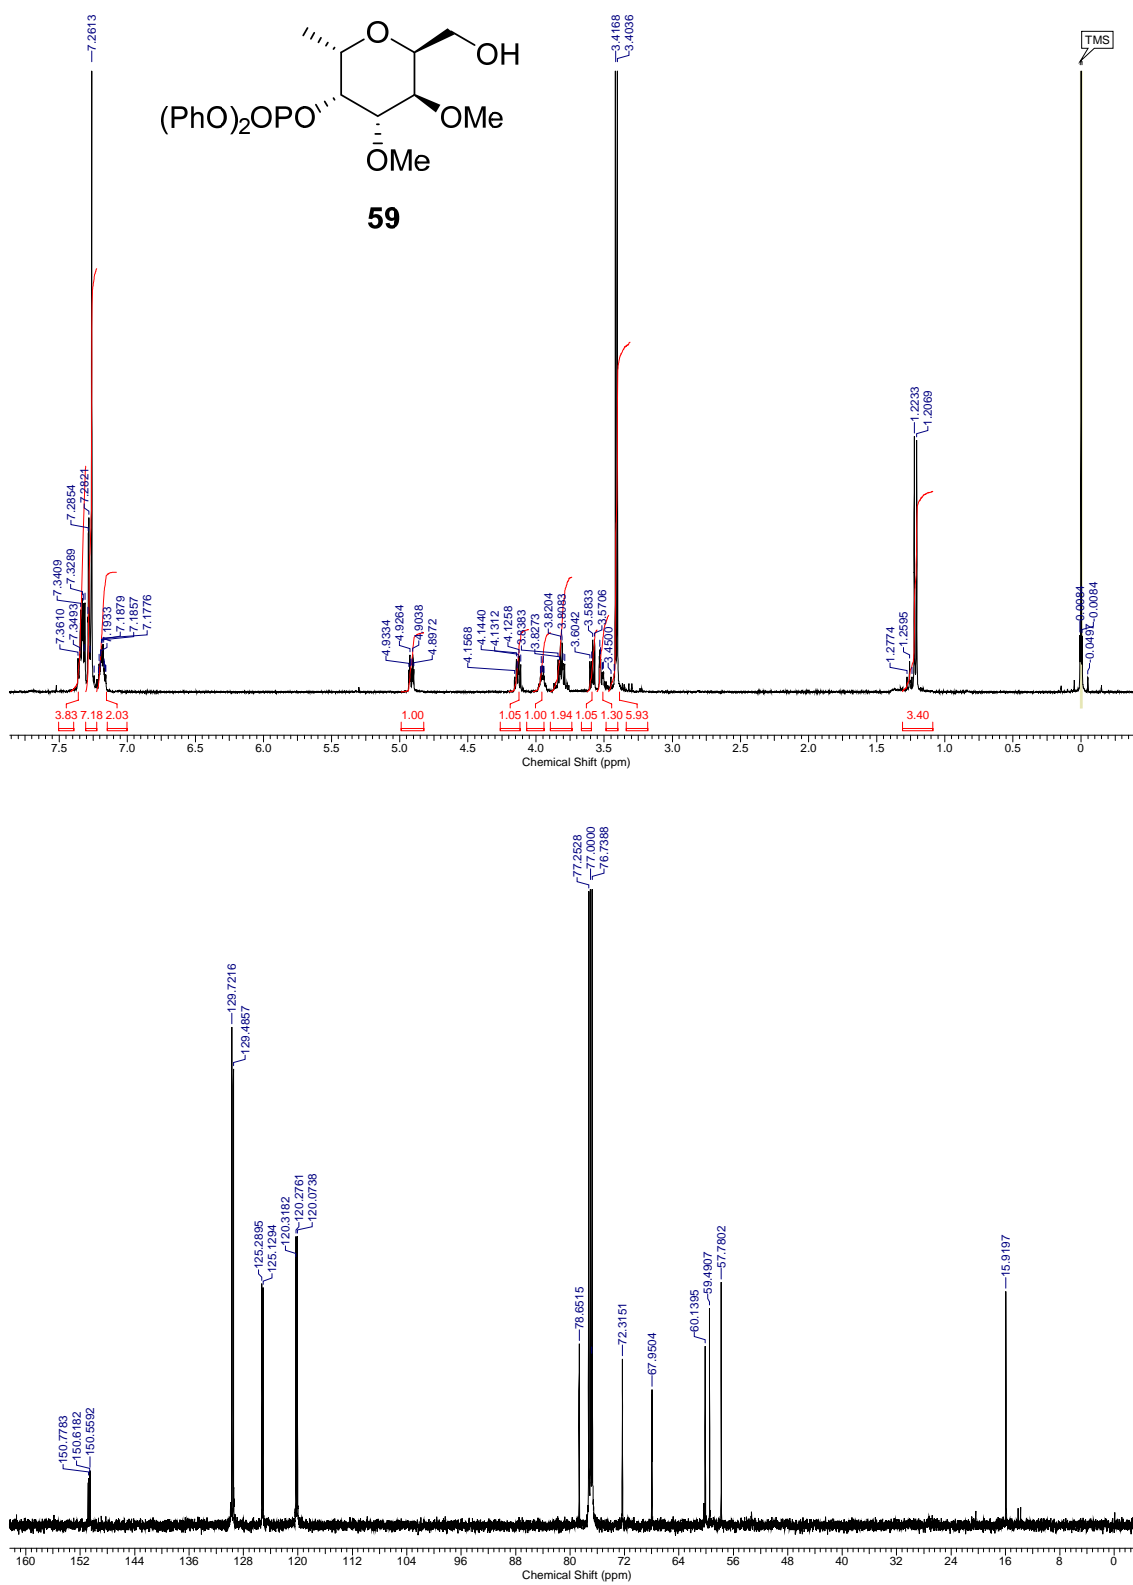

**Fig. S60.** <sup>1</sup>H NMR (400 MHz, CDCl<sub>3</sub>) and <sup>13</sup>C{<sup>1</sup>H} NMR (125.7 MHz, CDCl<sub>3</sub>) of compound **59**.

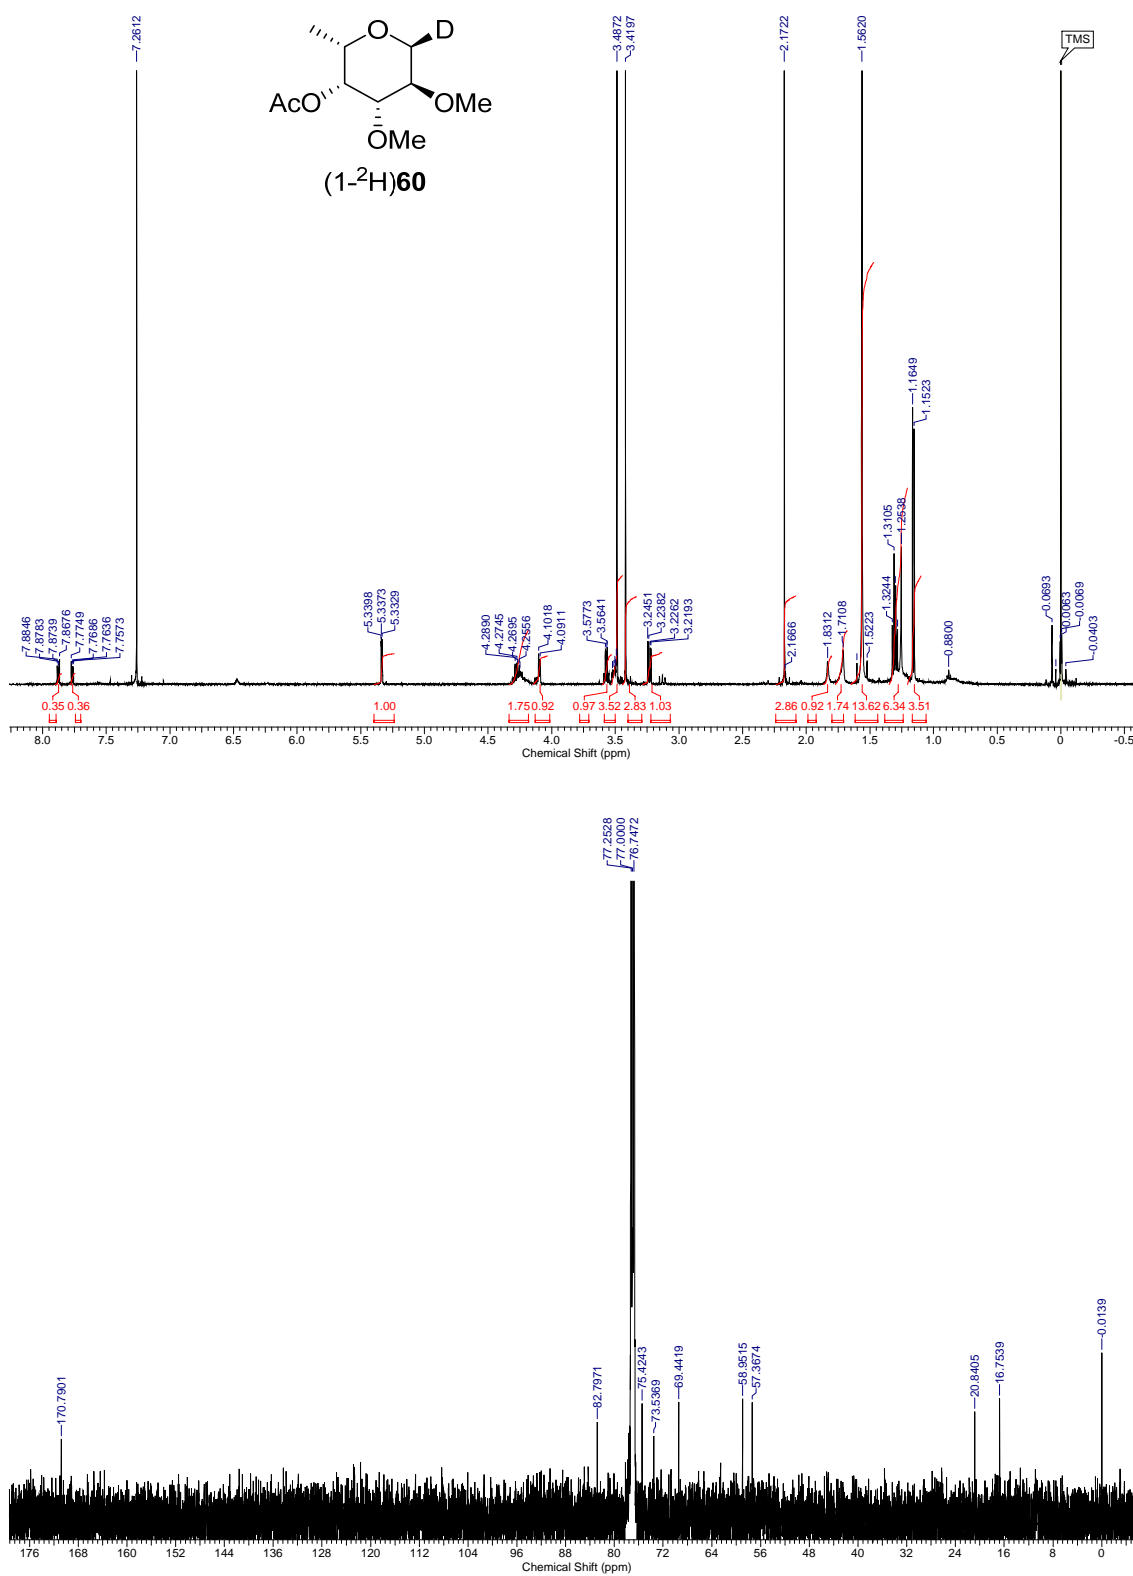

Fig. S61. <sup>1</sup>H NMR (500 MHz, CDCl<sub>3</sub>) and <sup>13</sup>C{H} NMR (125.7 MHz, CDCl<sub>3</sub>) of compound (1-<sup>2</sup>H)60.

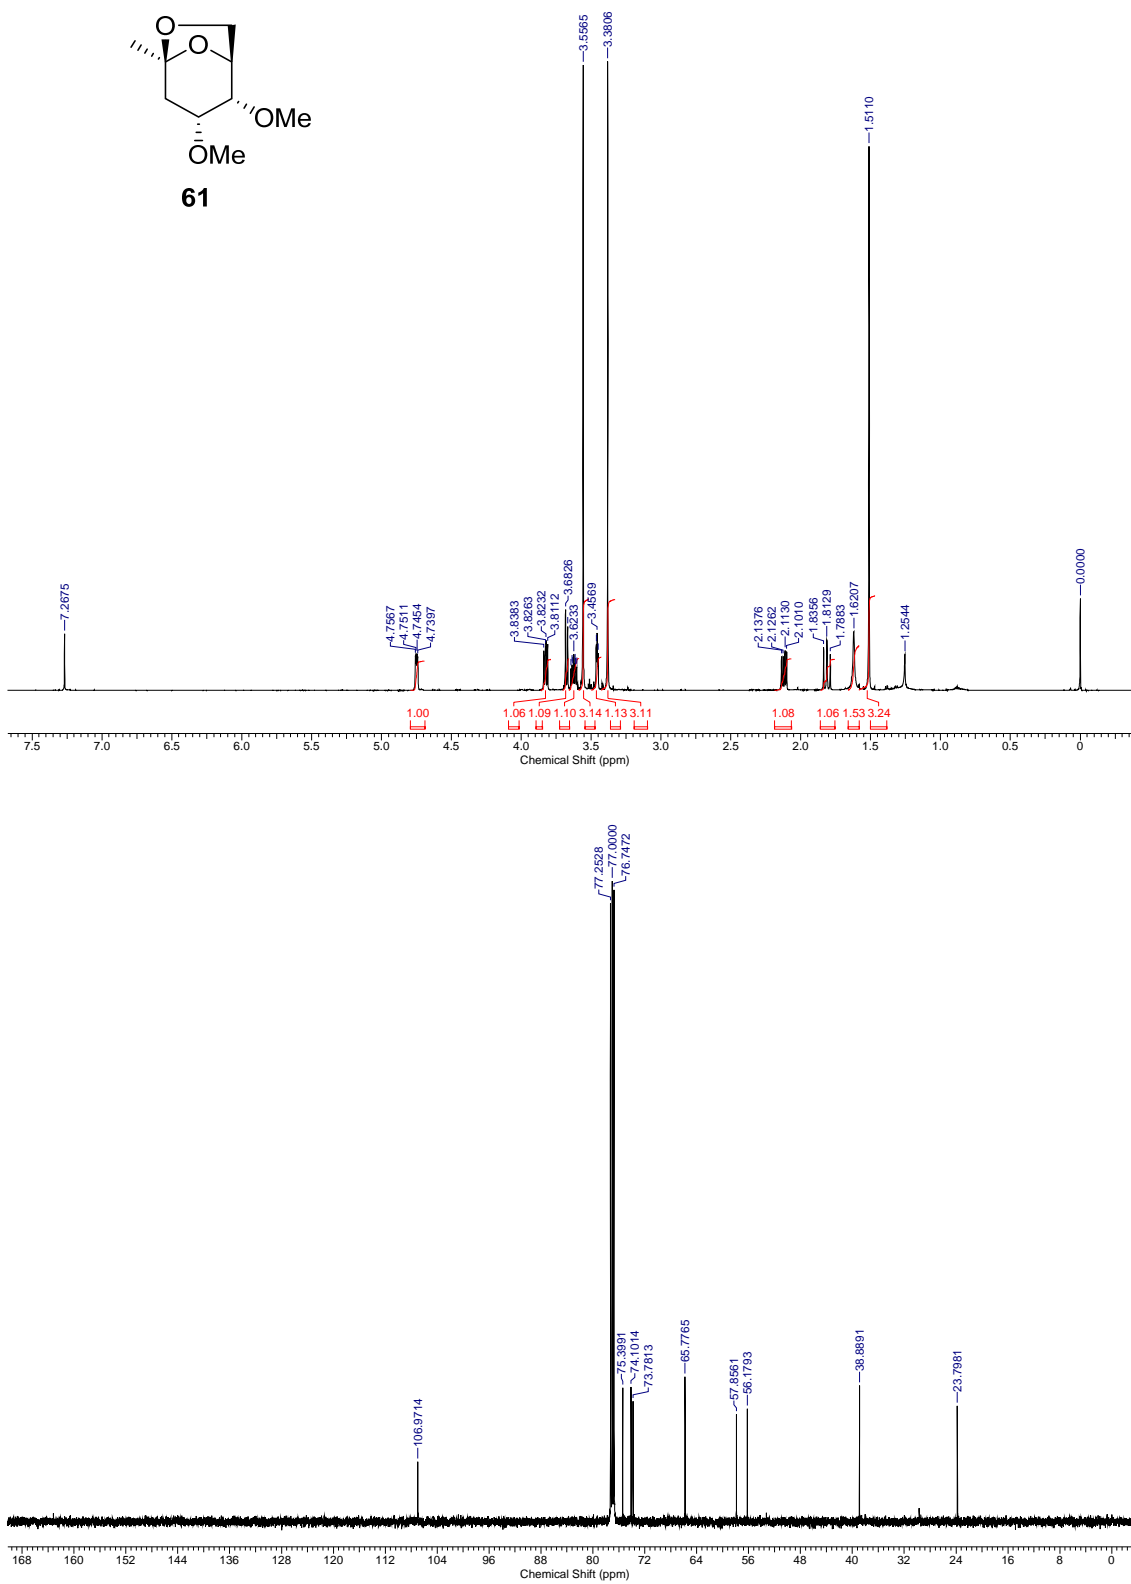

**Fig. S62.** <sup>1</sup>H NMR (500 MHz, CDCl<sub>3</sub>) and <sup>13</sup>C{<sup>1</sup>H} NMR (125.7 MHz, CDCl<sub>3</sub>) of compound **61**.

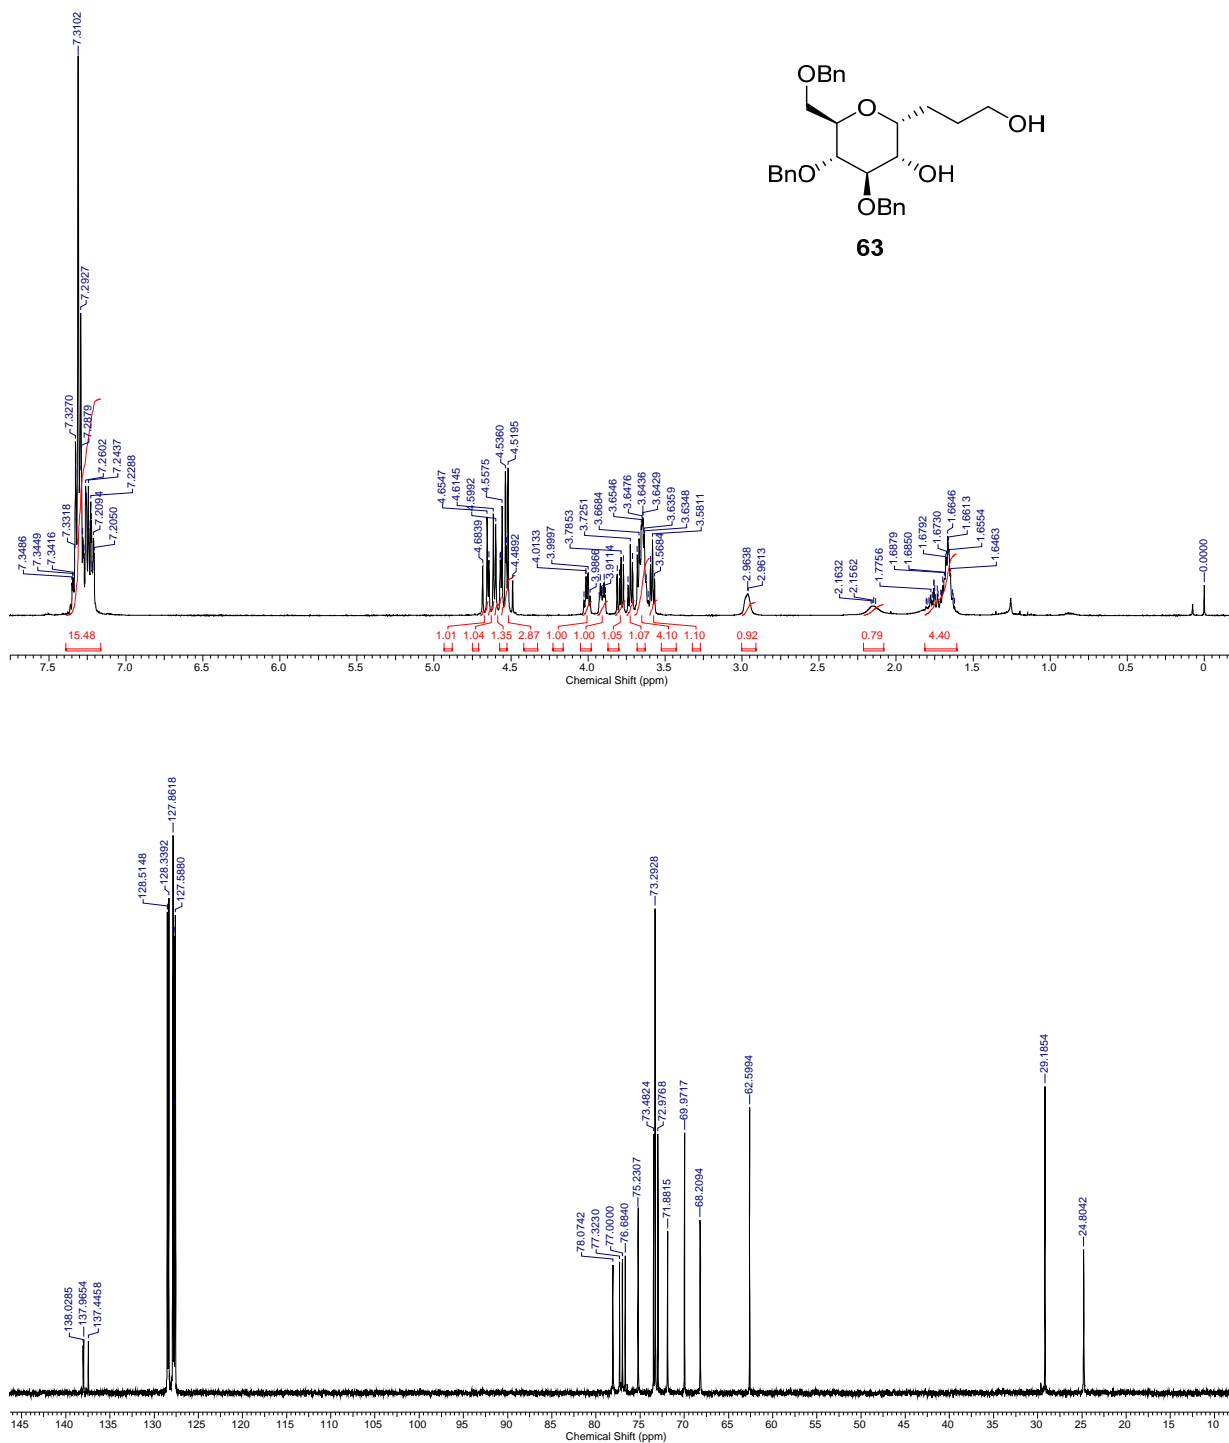

**Fig. S63.** <sup>1</sup>H NMR (400 MHz, CDCl<sub>3</sub>) and <sup>13</sup>C{<sup>1</sup>H} NMR (100.6 MHz, CDCl<sub>3</sub>) of compound **63**.

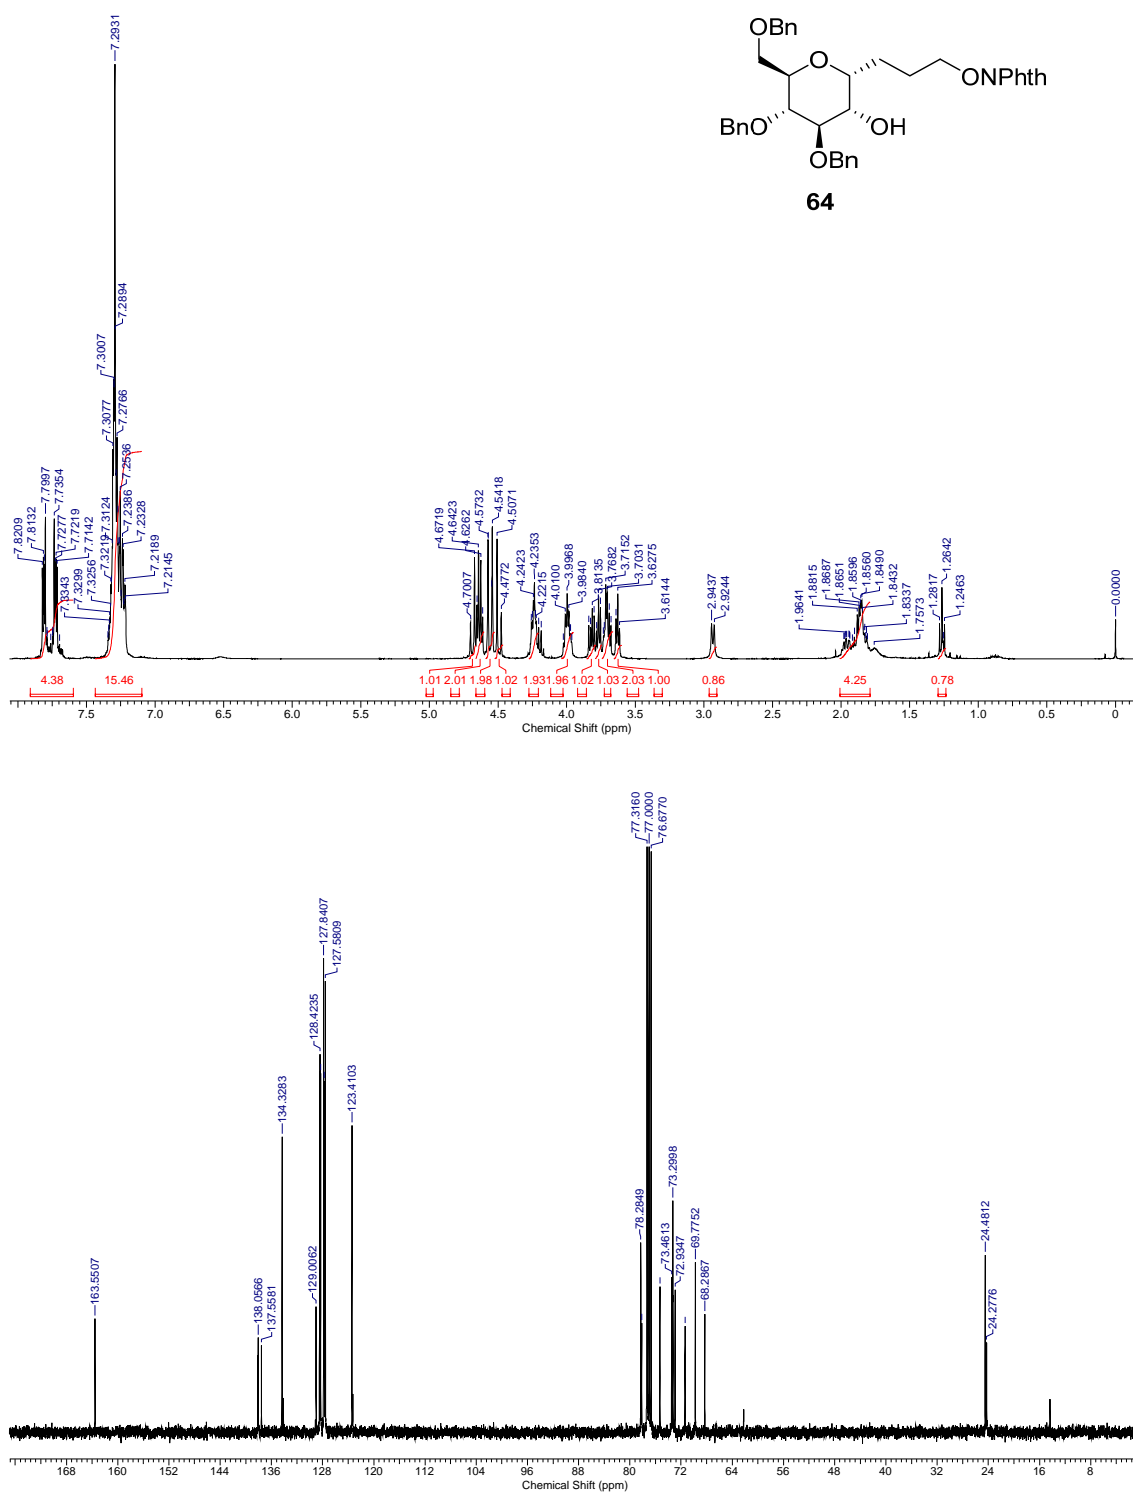

**Fig. S64.** <sup>1</sup>H NMR (400 MHz, CDCl<sub>3</sub>) and <sup>13</sup>C{H} NMR (100.6 MHz, CDCl<sub>3</sub>) of compound **64**.

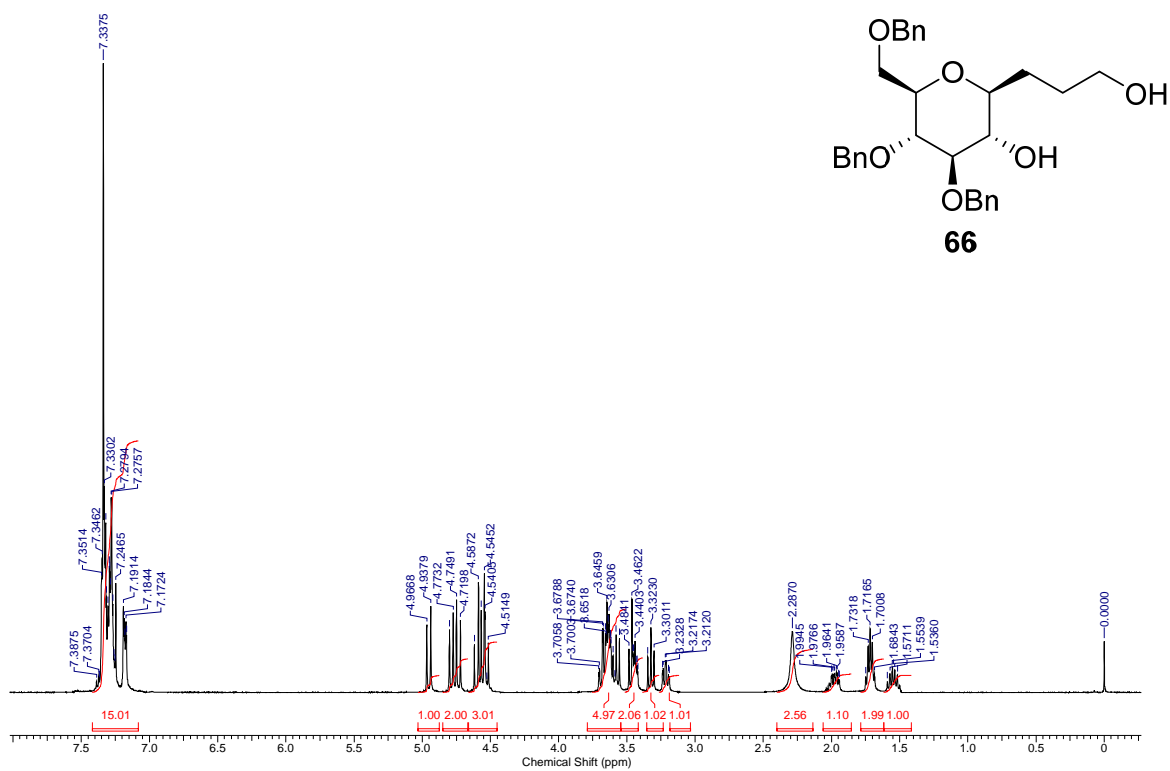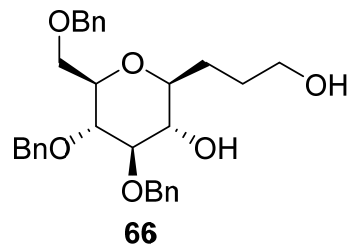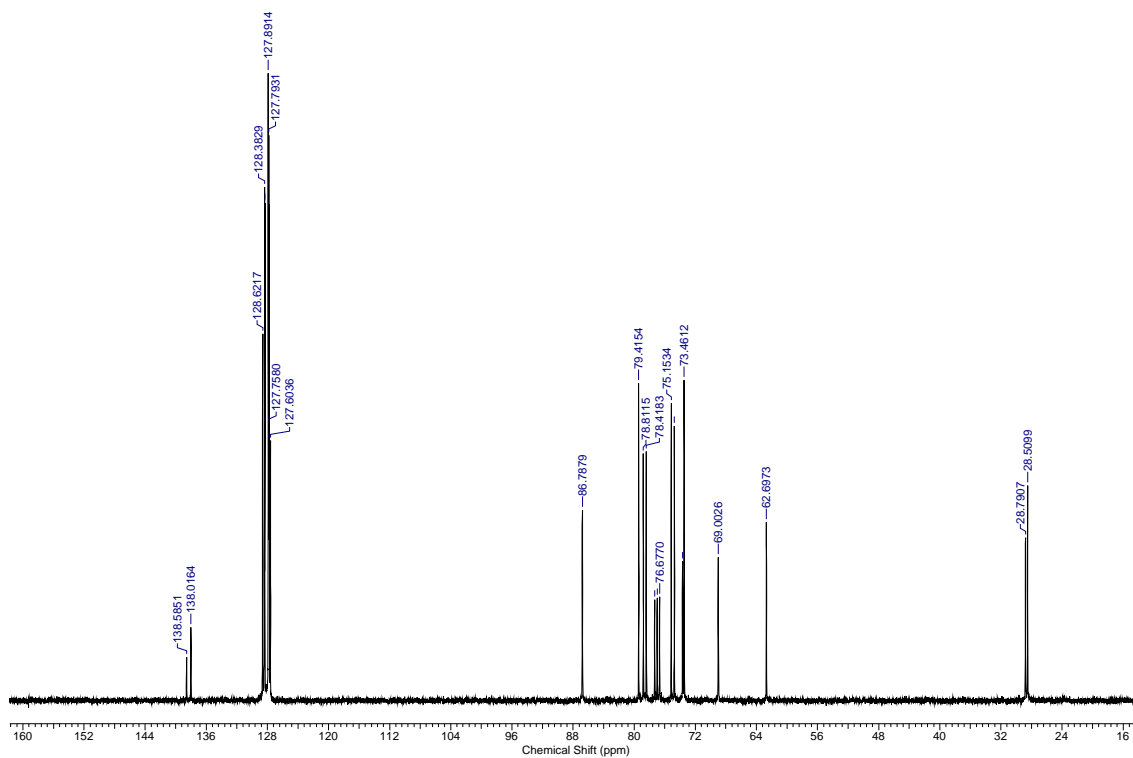

Fig. S65.  $^1\text{H}$  NMR (400 MHz,  $\text{CDCl}_3$ ) and  $^{13}\text{C}\{^1\text{H}\}$  NMR (100.6 MHz,  $\text{CDCl}_3$ ) of compound **66**.

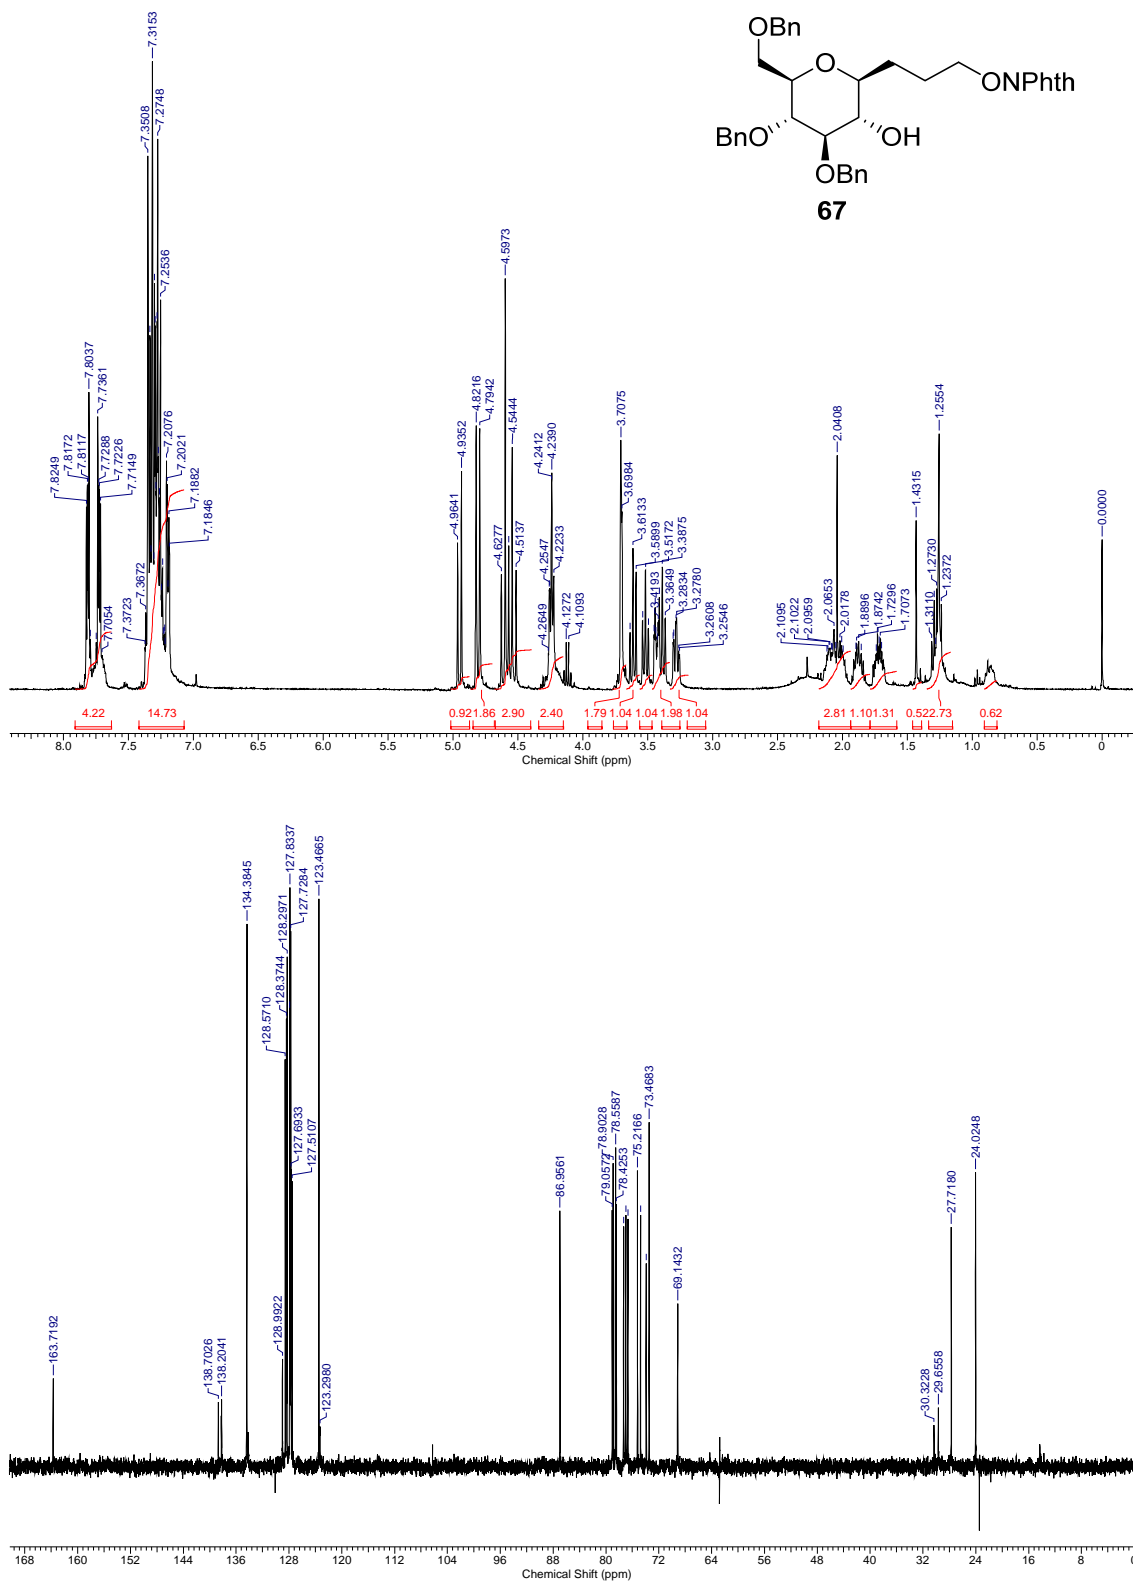

**Fig. S66.**  $^1\text{H}$  NMR (400 MHz,  $\text{CDCl}_3$ ) and  $^{13}\text{C}\{^1\text{H}\}$  NMR (100.6 MHz,  $\text{CDCl}_3$ ) of compound **67**.



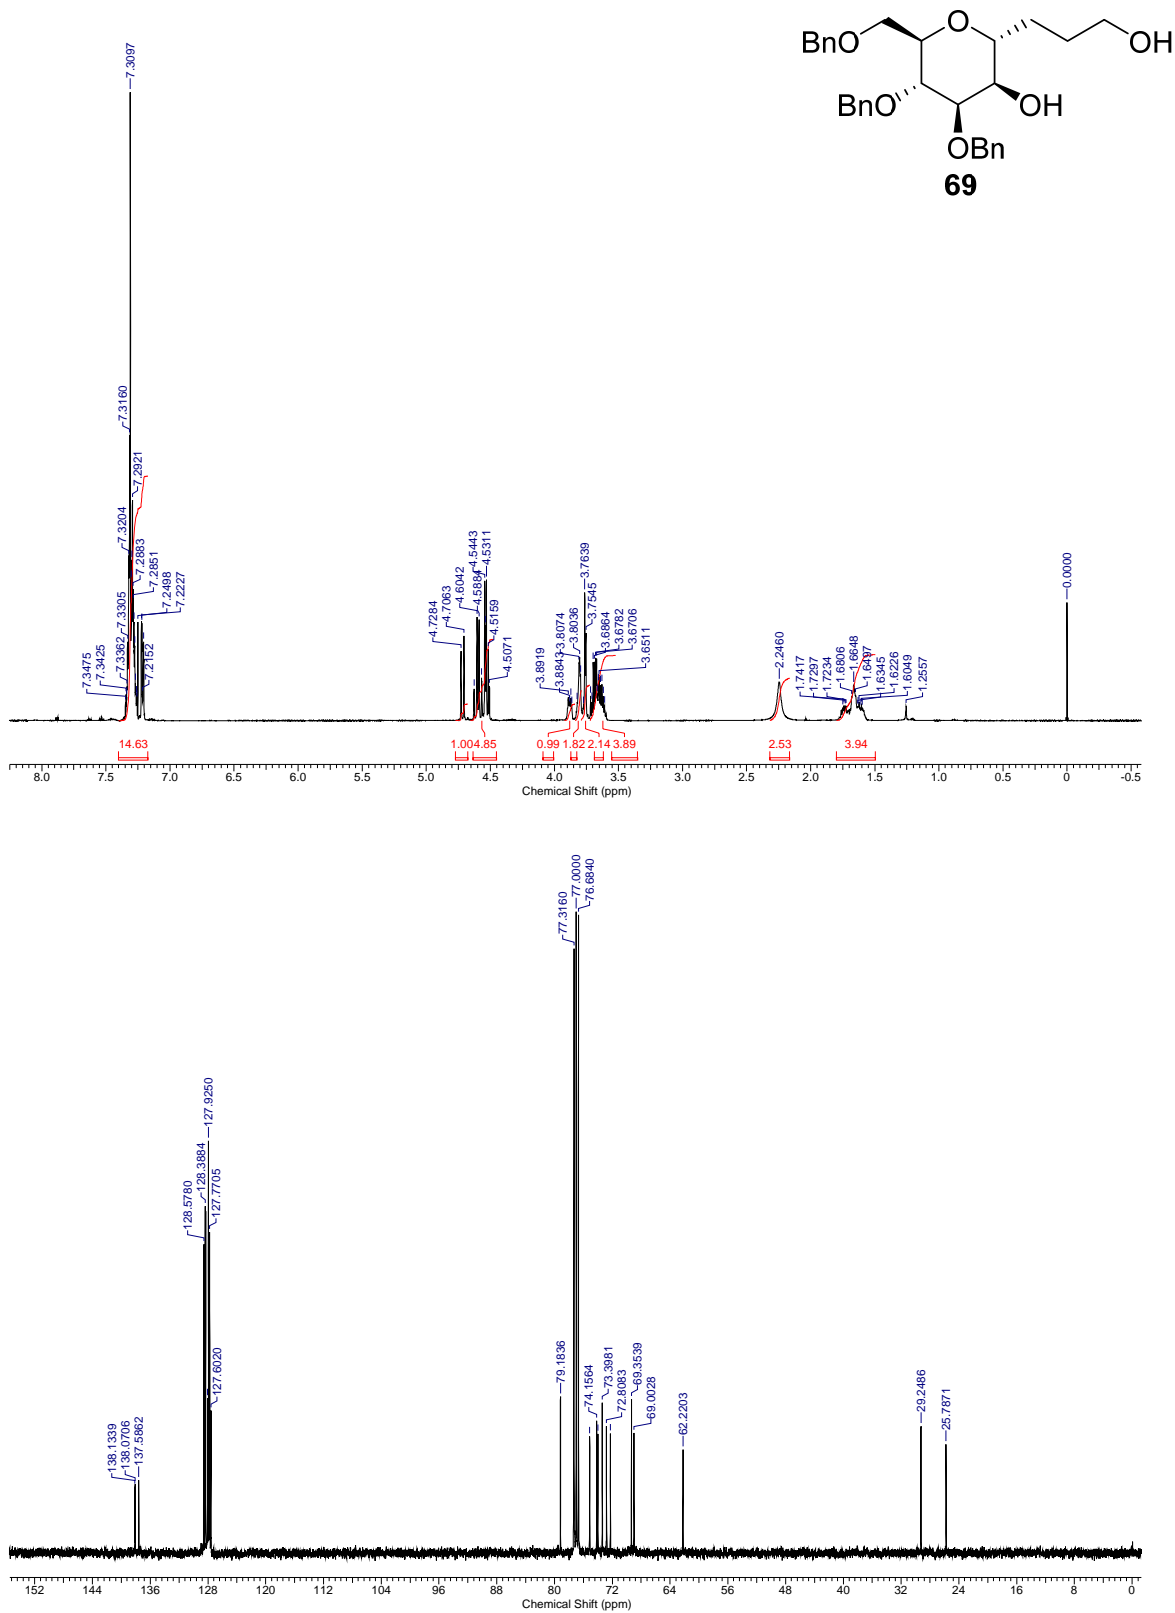

**Fig. S67.** <sup>1</sup>H NMR (500 MHz, CDCl<sub>3</sub>) and <sup>13</sup>C{<sup>1</sup>H} NMR (100.6 MHz, CDCl<sub>3</sub>) of compound **69**.

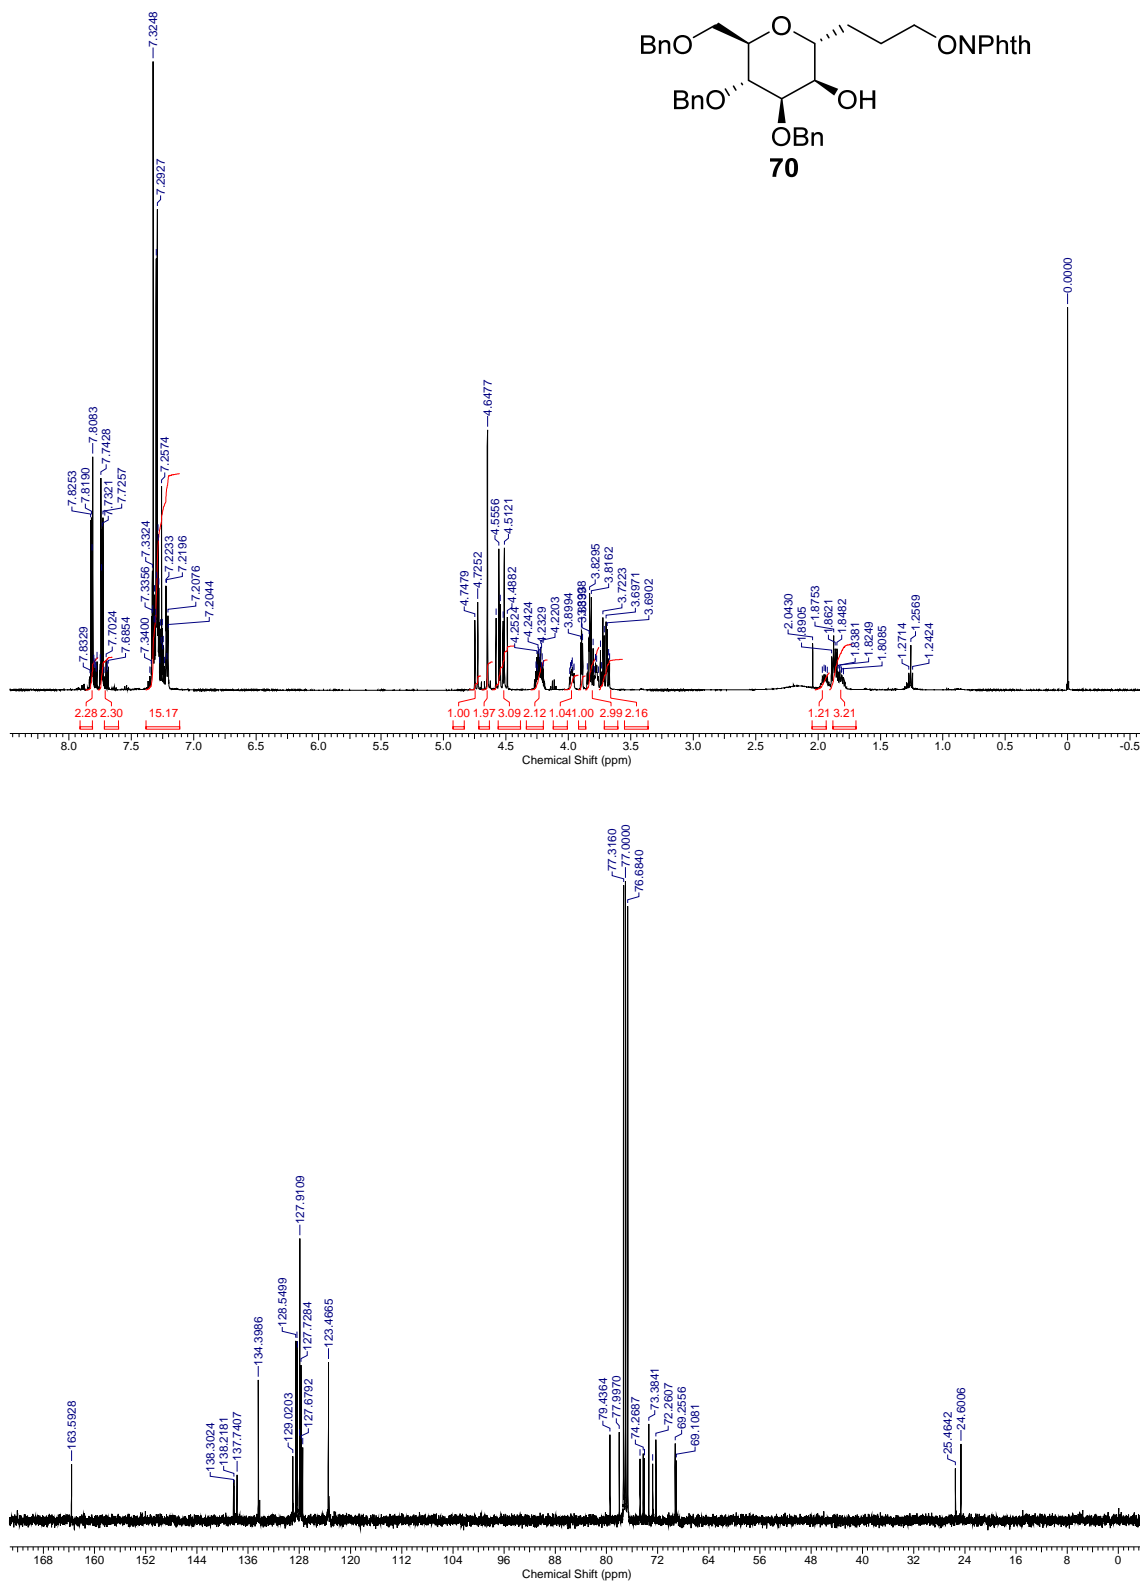

**Fig. S68.** <sup>1</sup>H NMR (500 MHz, CDCl<sub>3</sub>) and <sup>13</sup>C{<sup>1</sup>H} NMR (100.6 MHz, CDCl<sub>3</sub>) of compound **70**.

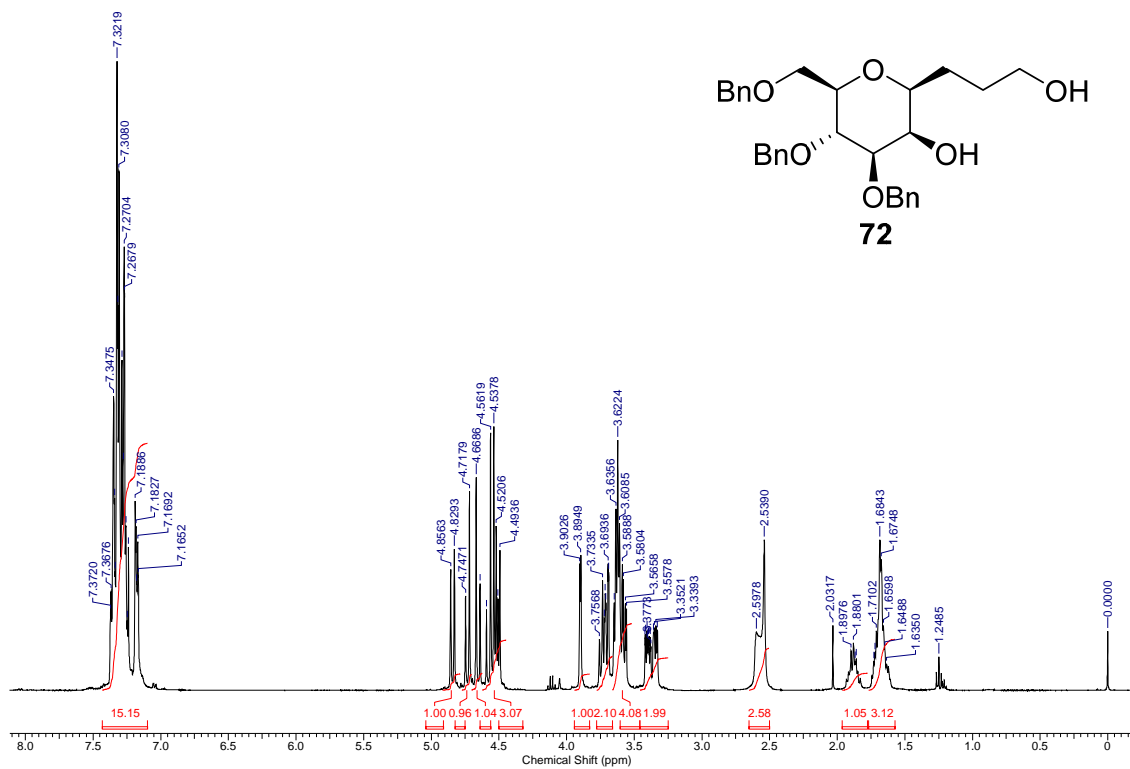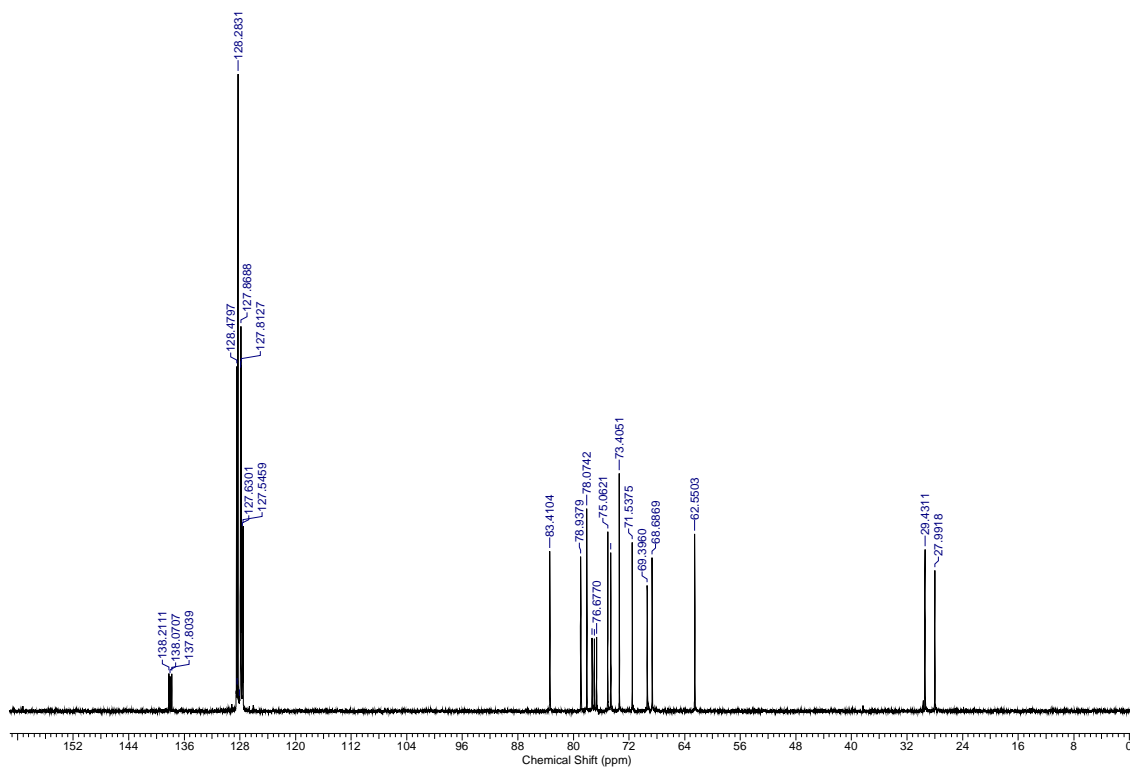

Fig. S69. <sup>1</sup>H NMR (400 MHz, CDCl<sub>3</sub>) and <sup>13</sup>C{H} NMR (100.6 MHz, CDCl<sub>3</sub>) of compound **72**.

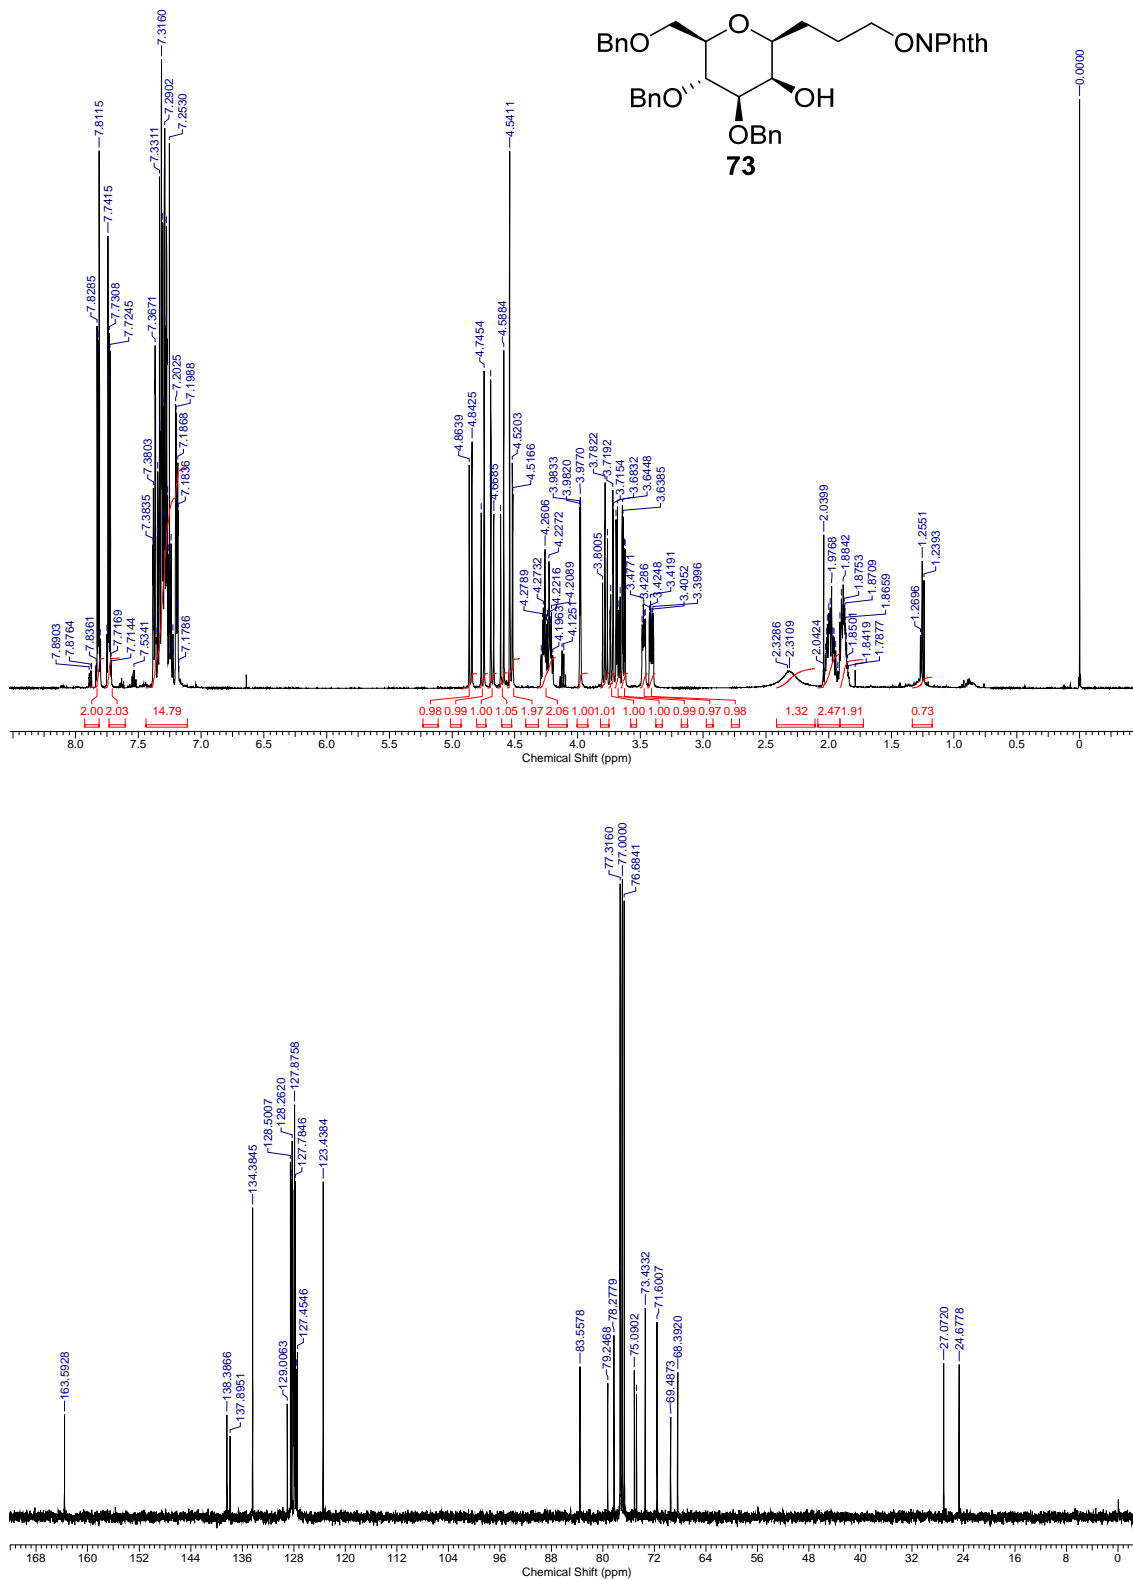

**Fig. S70.** <sup>1</sup>H NMR (500 MHz, CDCl<sub>3</sub>) and <sup>13</sup>C{<sup>1</sup>H} NMR (100.6 MHz, CDCl<sub>3</sub>) of compound **73**.

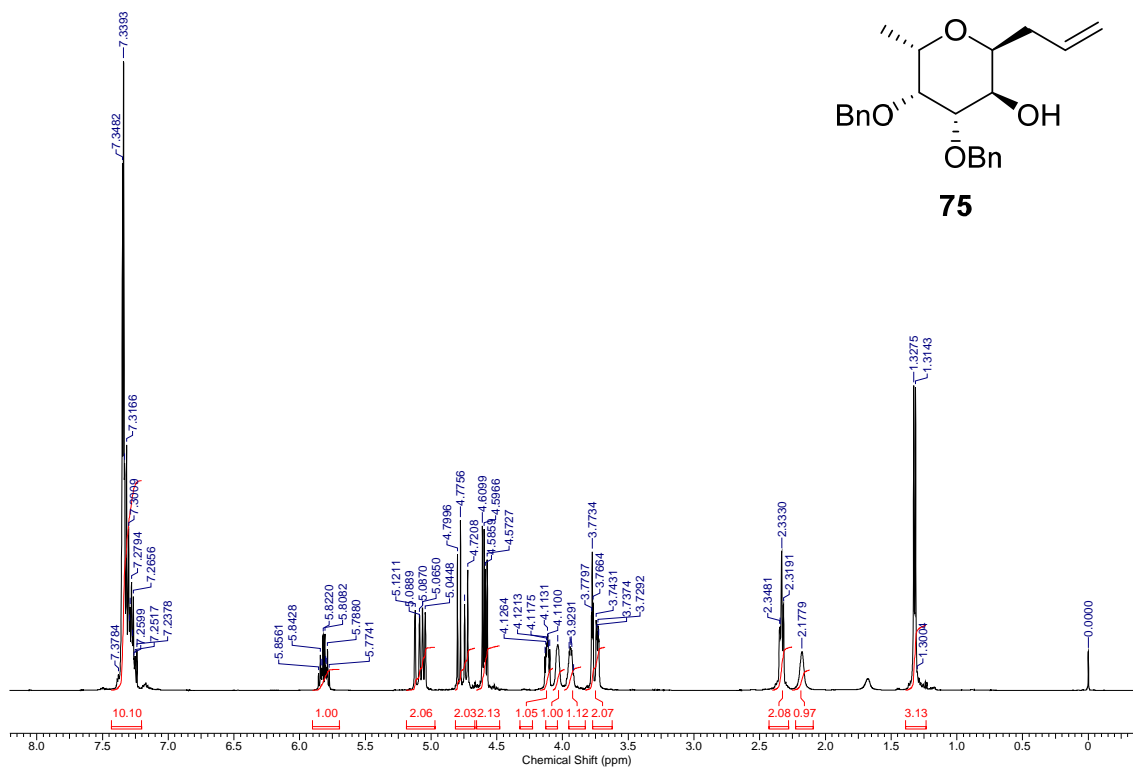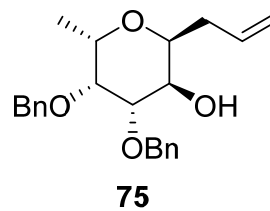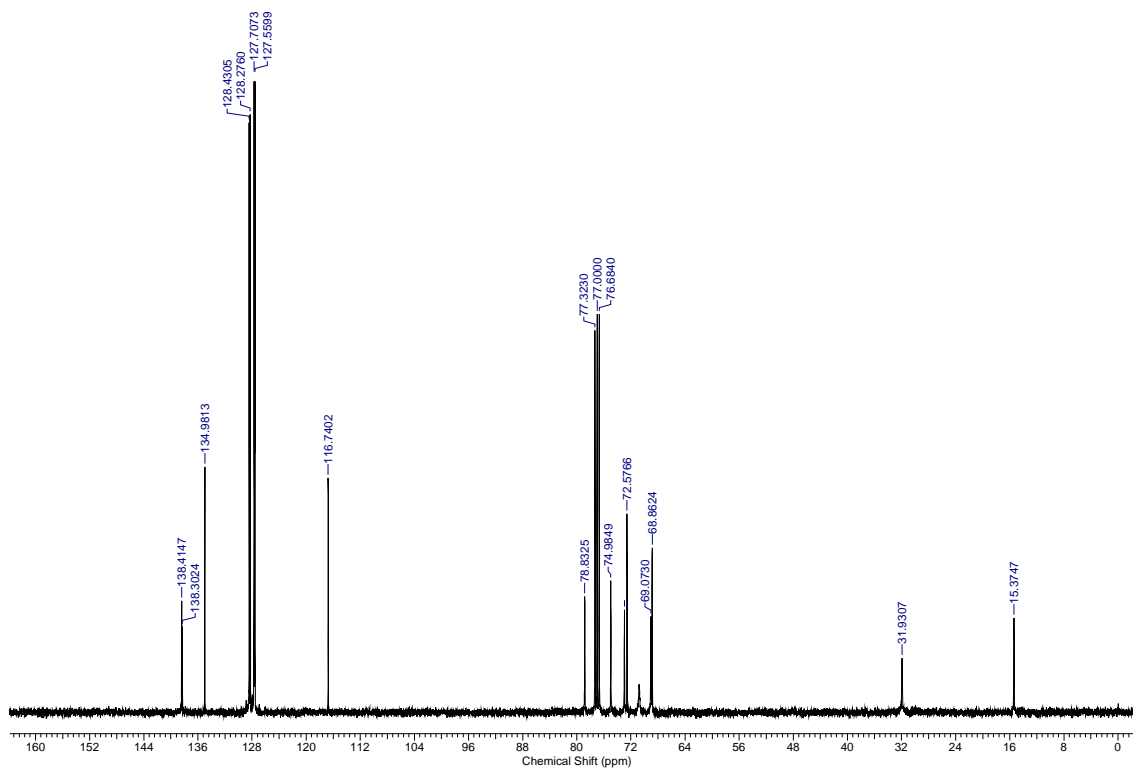

**Fig. S71.** <sup>1</sup>H NMR (500 MHz, CDCl<sub>3</sub>) and <sup>13</sup>C{H} NMR (100.6 MHz, CDCl<sub>3</sub>) of compound **75**.

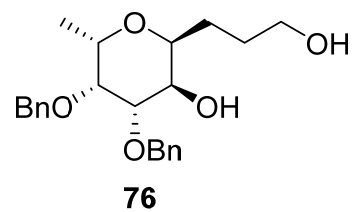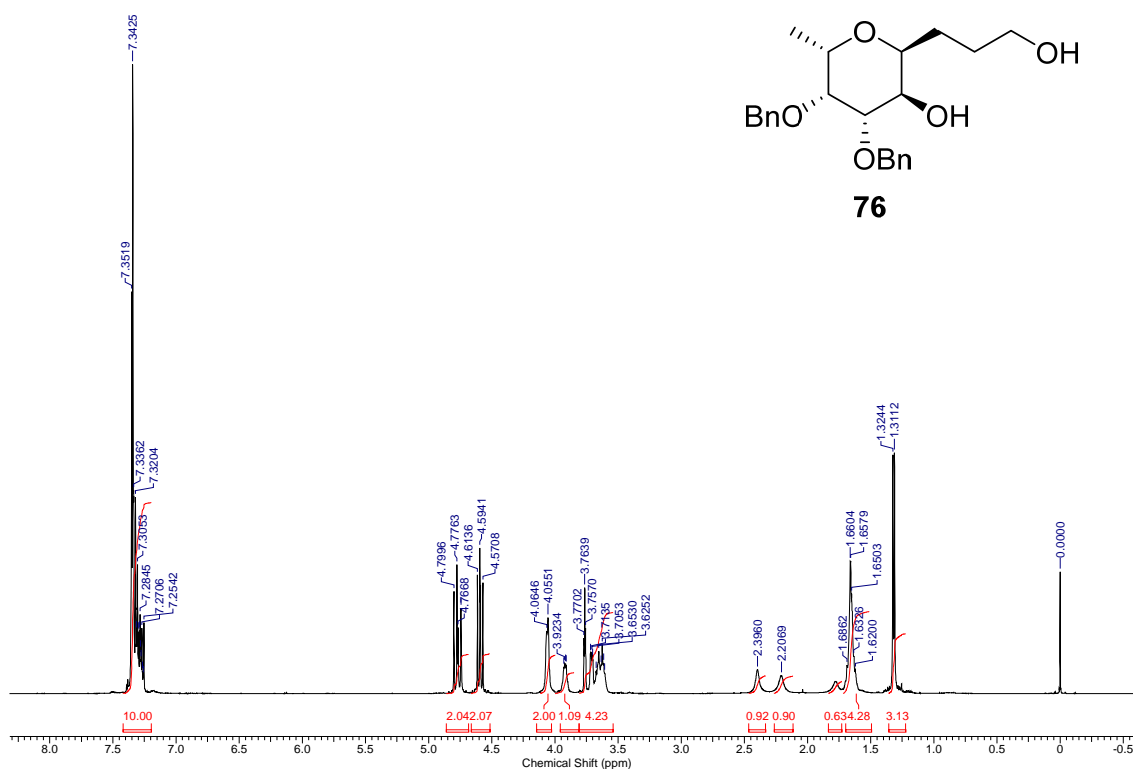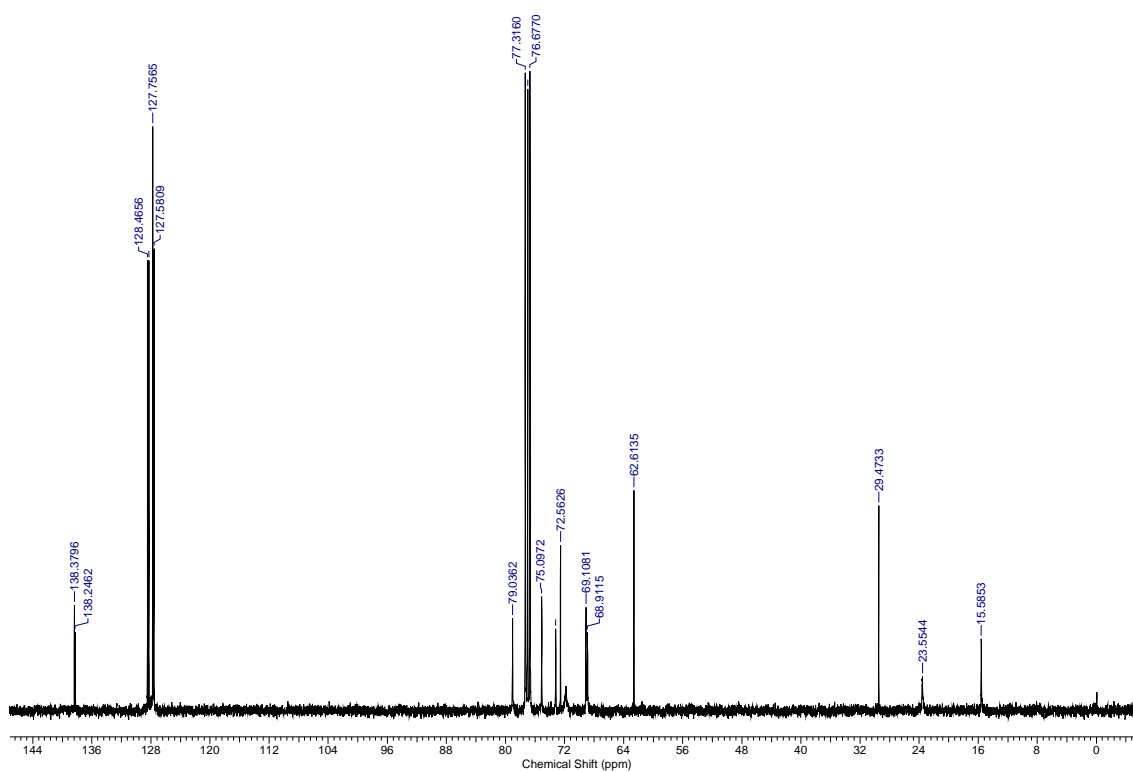

**Fig. S72.** <sup>1</sup>H NMR (500 MHz, CDCl<sub>3</sub>) and <sup>13</sup>C{<sup>1</sup>H} NMR (100.6 MHz, CDCl<sub>3</sub>) of compound **76**.

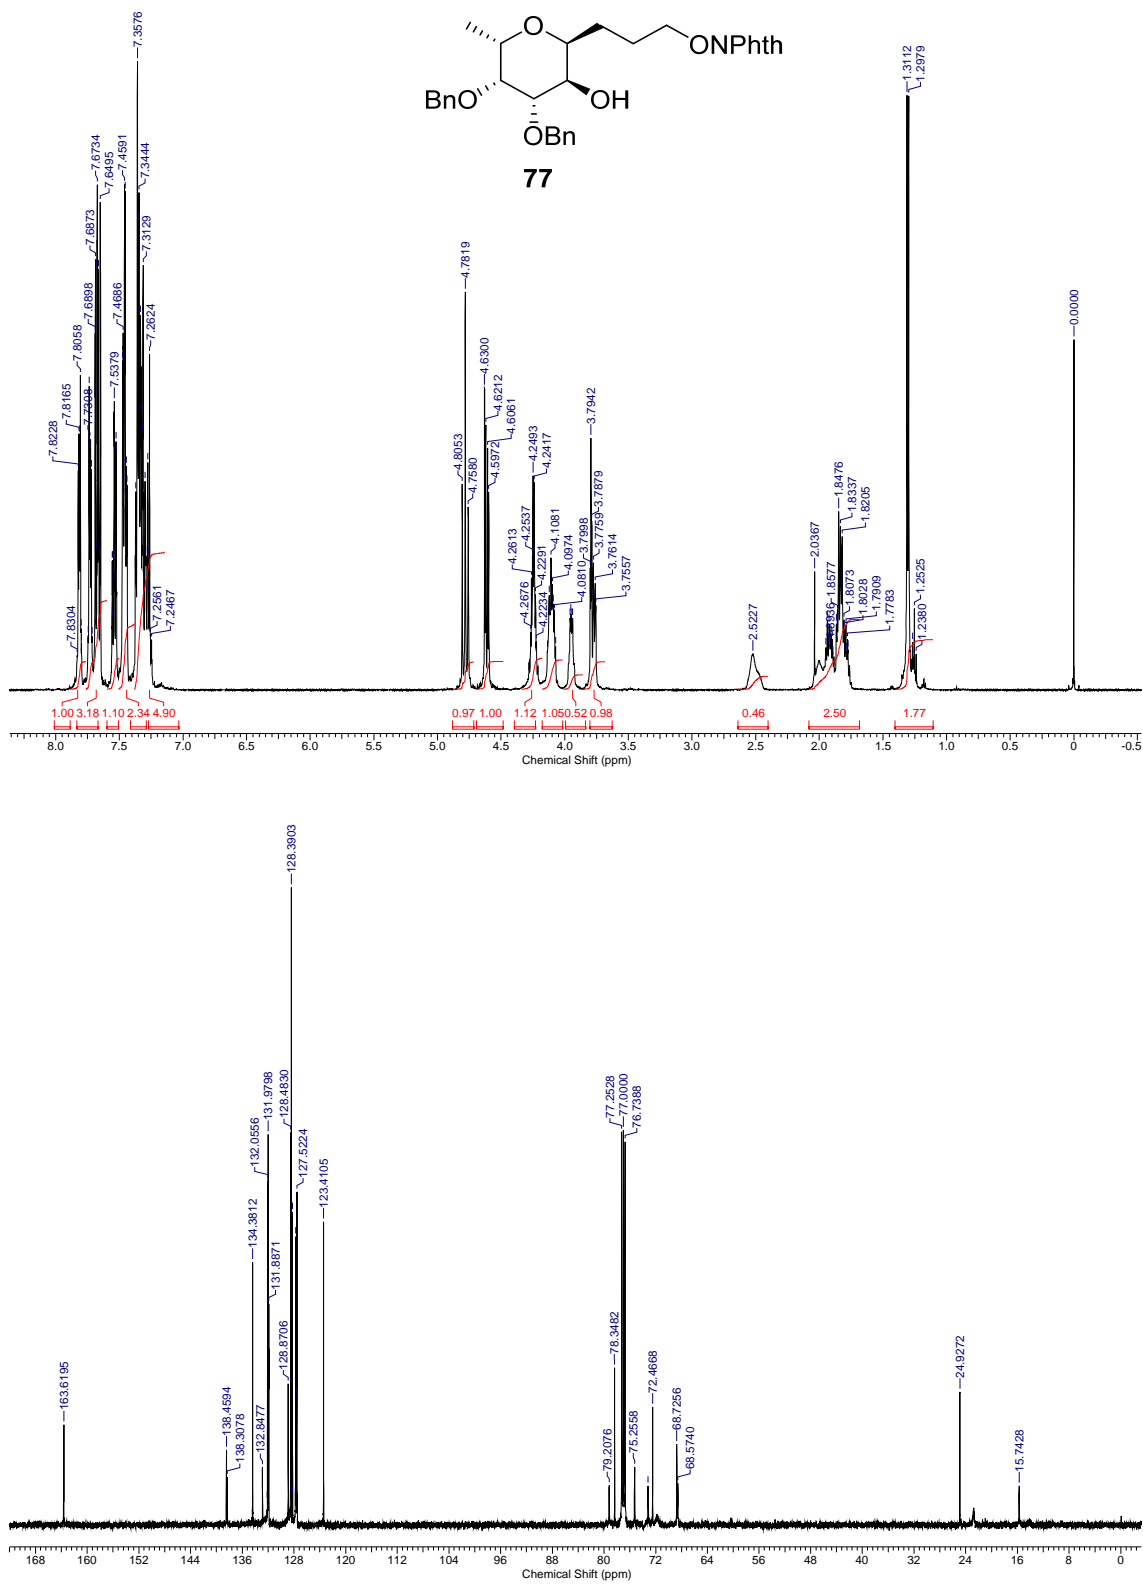

**Fig. S73.** <sup>1</sup>H NMR (500 MHz, CDCl<sub>3</sub>) and <sup>13</sup>C{H} NMR (125.7 MHz, CDCl<sub>3</sub>) of compound **77**.

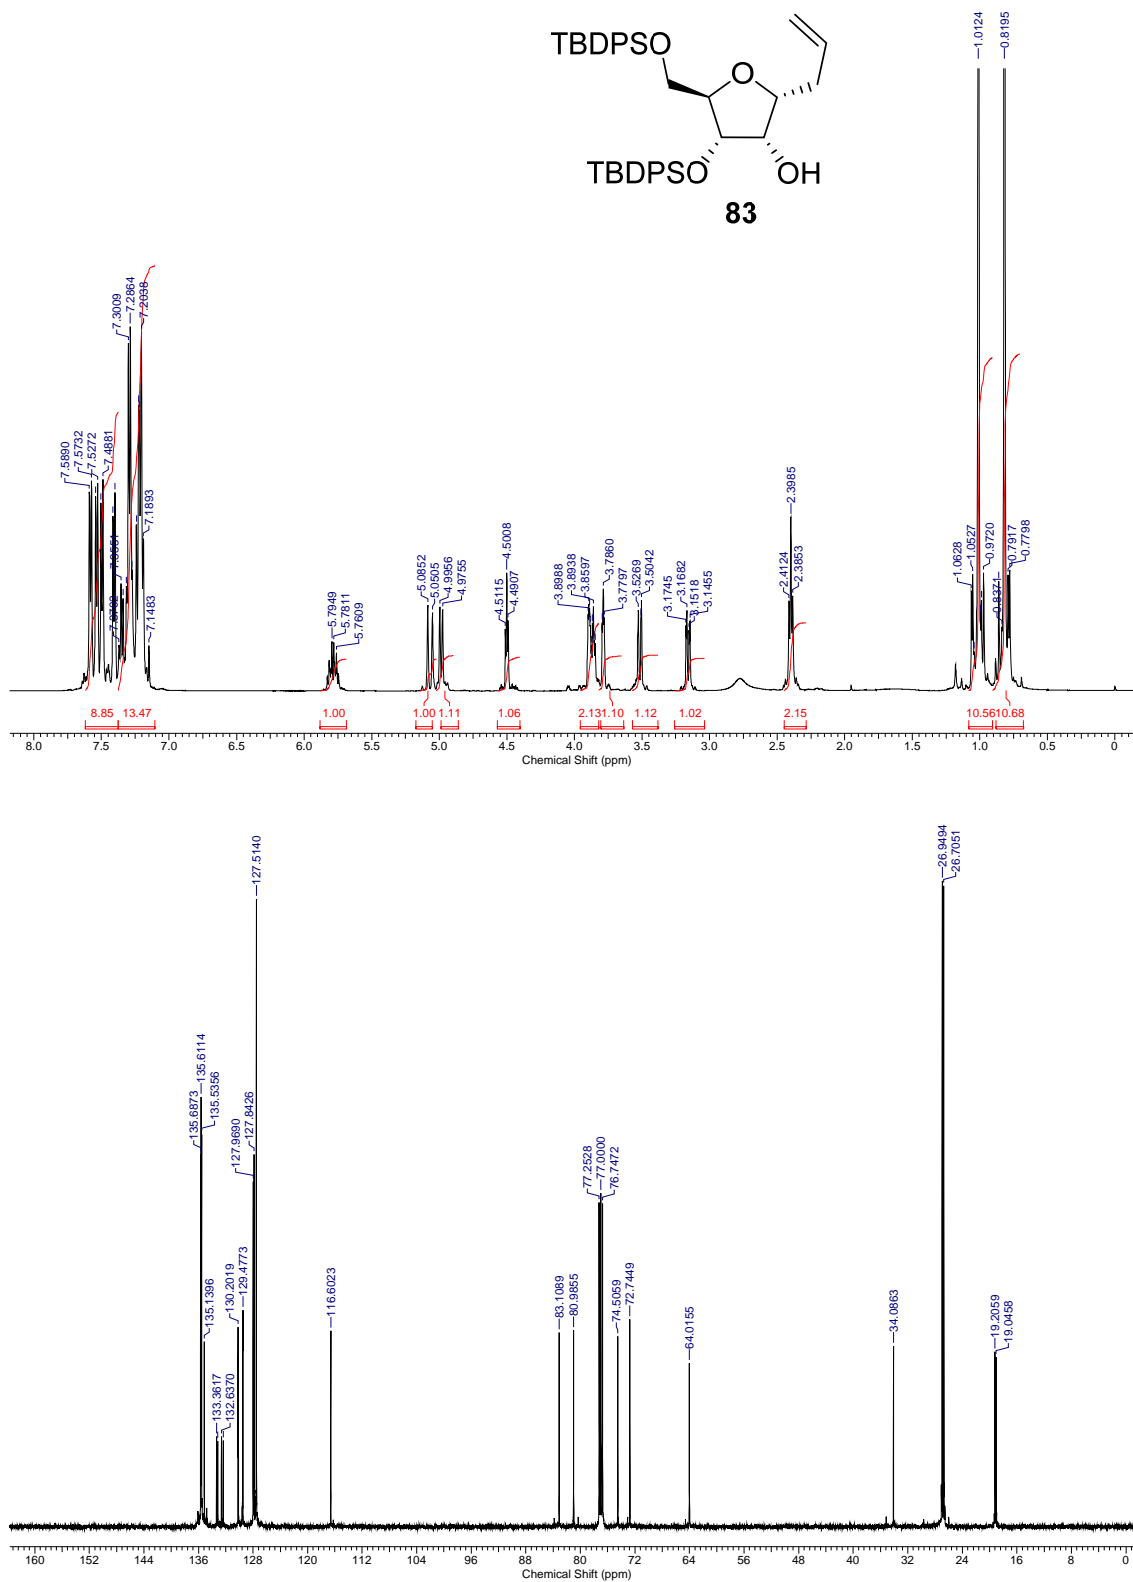

**Fig. S74.** <sup>1</sup>H NMR (500 MHz, CDCl<sub>3</sub>) and <sup>13</sup>C{H} NMR (125.7 MHz, CDCl<sub>3</sub>) of compound **83**.



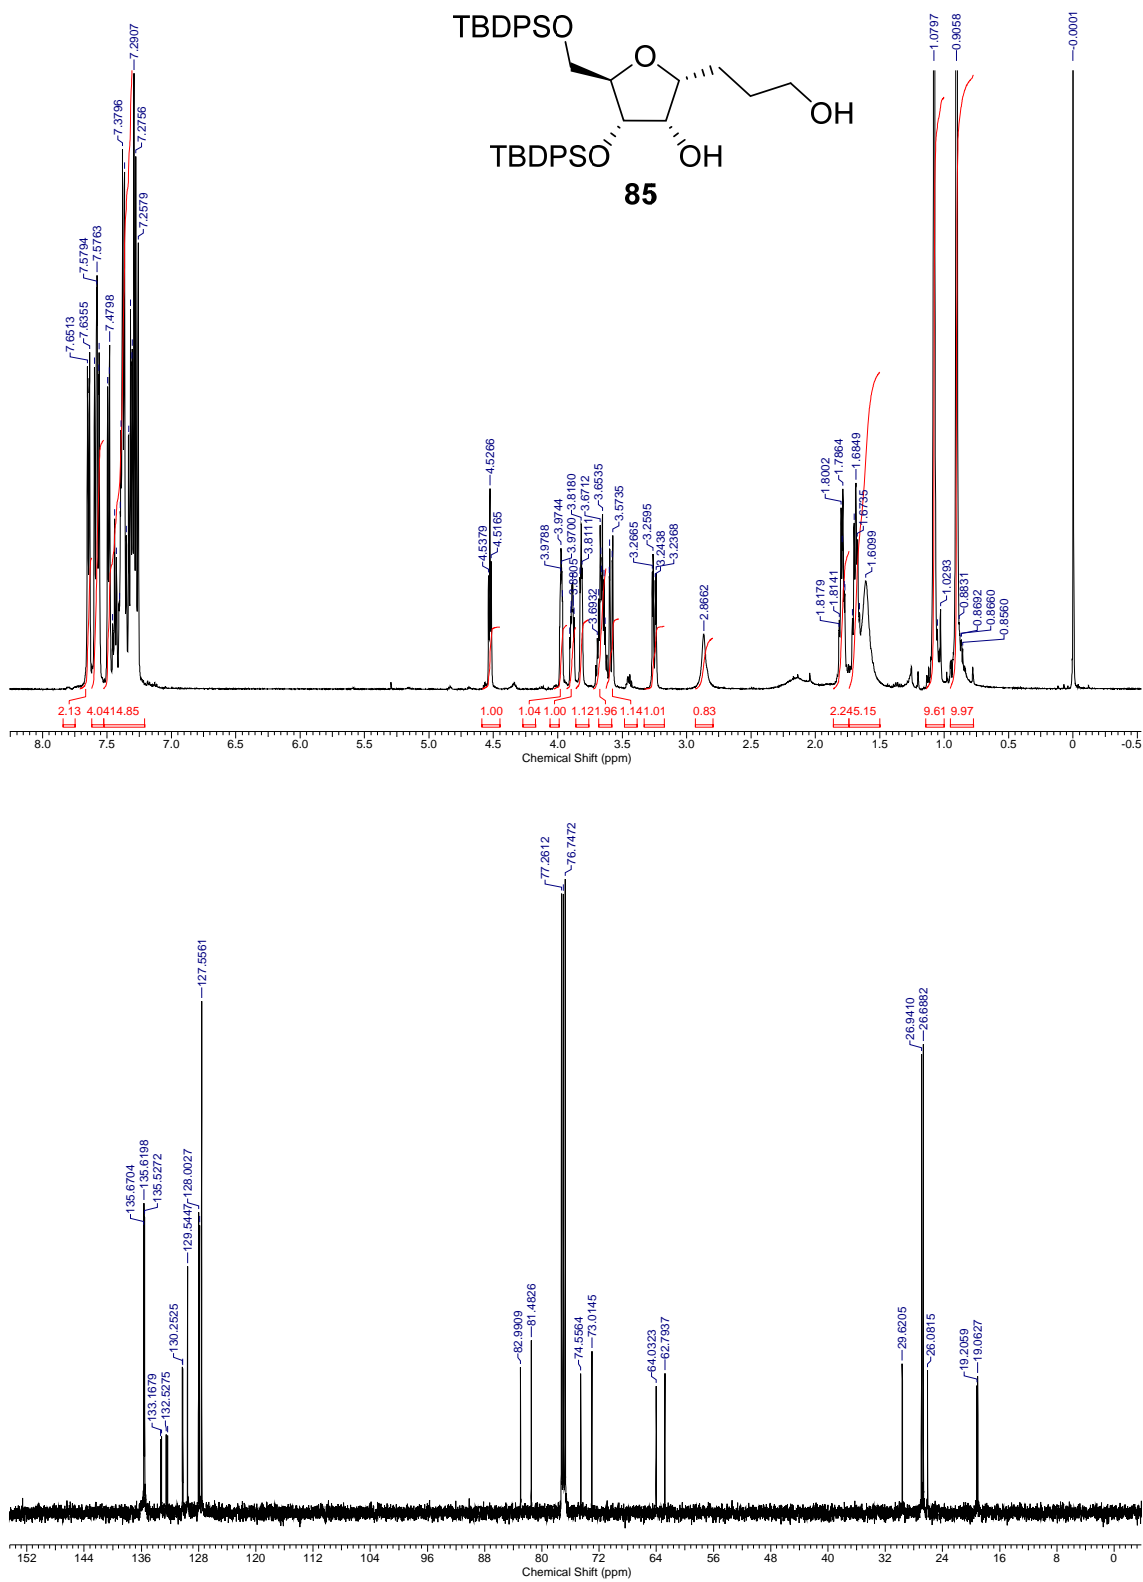

**Fig. S75.** <sup>1</sup>H NMR (500 MHz, CDCl<sub>3</sub>) and <sup>13</sup>C{<sup>1</sup>H} NMR (125.7 MHz, CDCl<sub>3</sub>) of compound **85**.

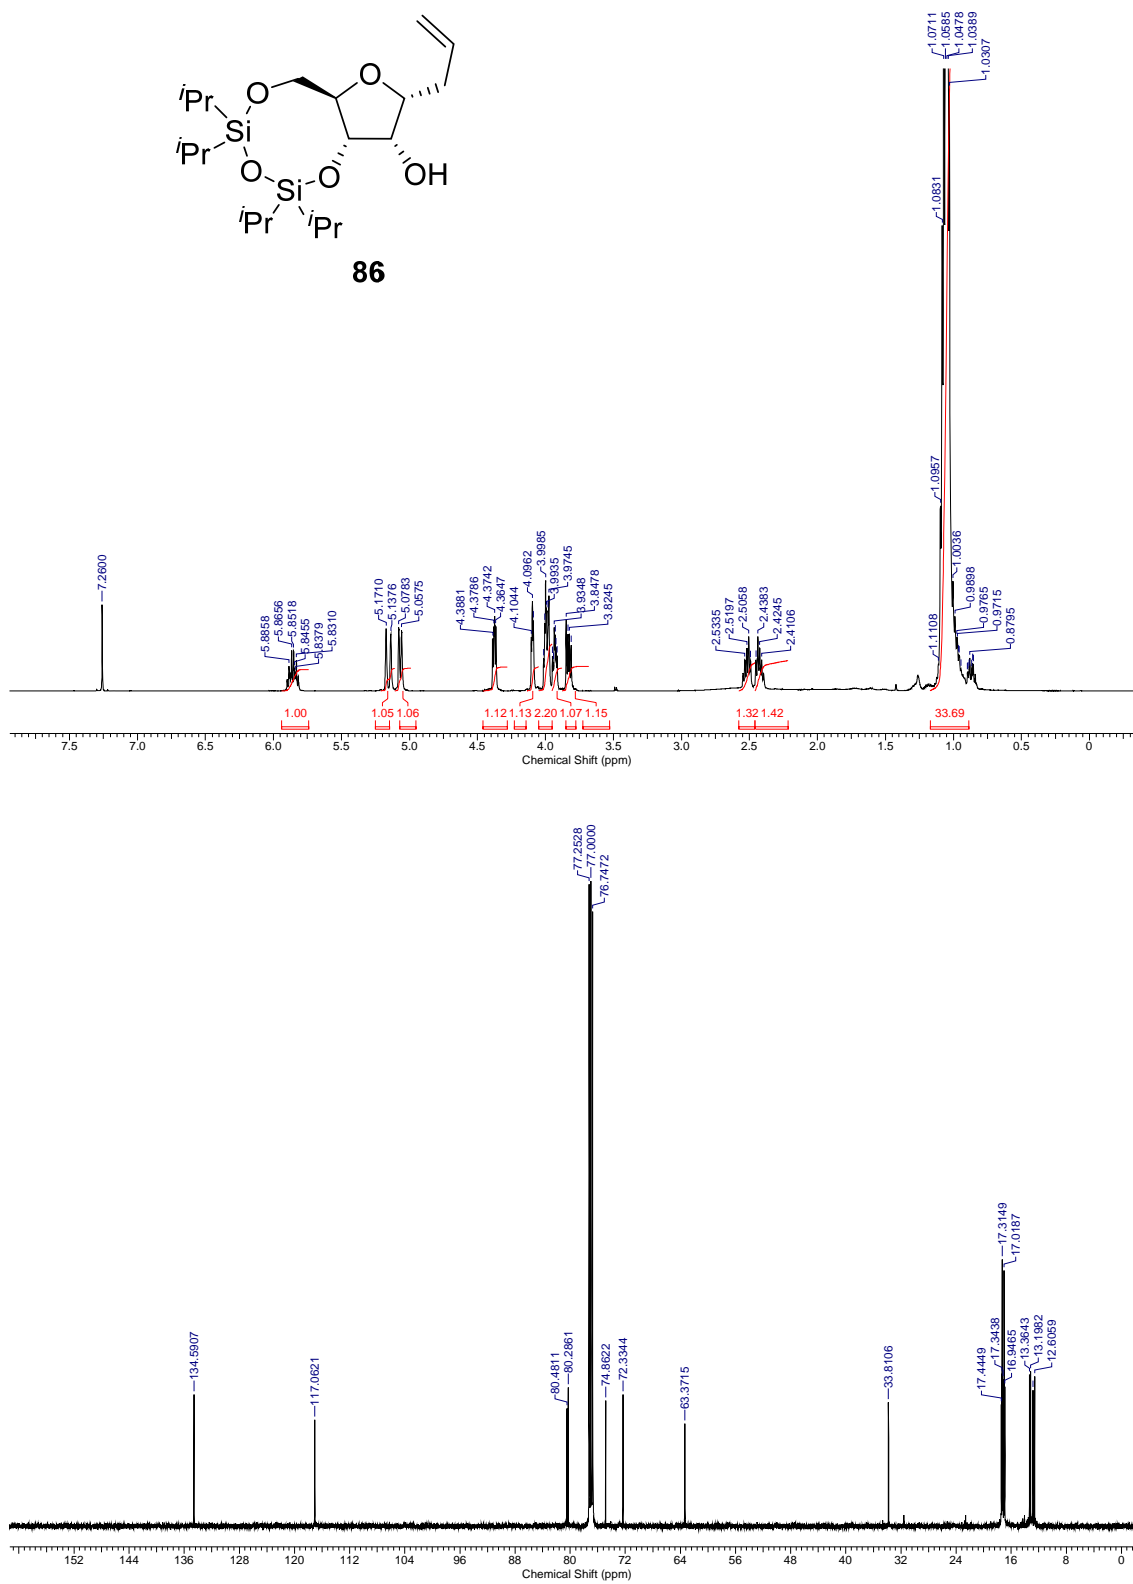

**Fig. S76.** <sup>1</sup>H NMR (500 MHz, CDCl<sub>3</sub>) and <sup>13</sup>C{H} NMR (125.7 MHz, CDCl<sub>3</sub>) of compound **86**.

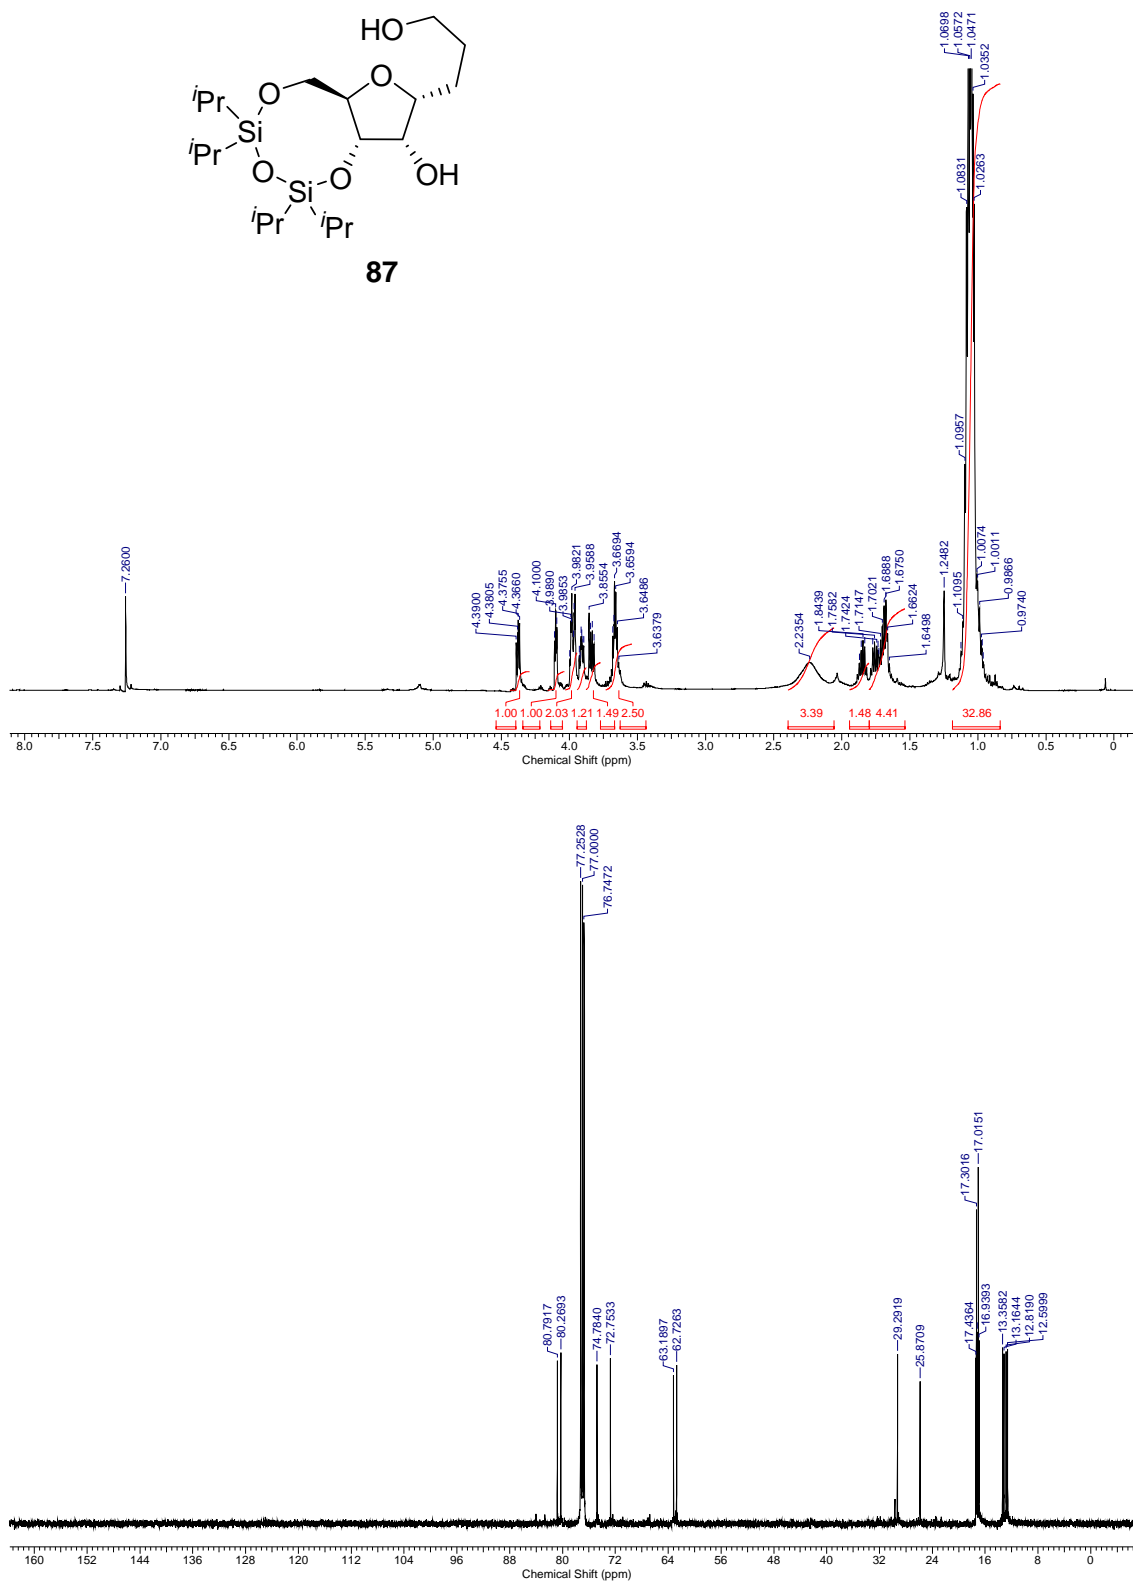

Fig. S77. <sup>1</sup>H NMR (500 MHz, CDCl<sub>3</sub>) and <sup>13</sup>C{<sup>1</sup>H} NMR (125.7 MHz, CDCl<sub>3</sub>) of compound **87**.

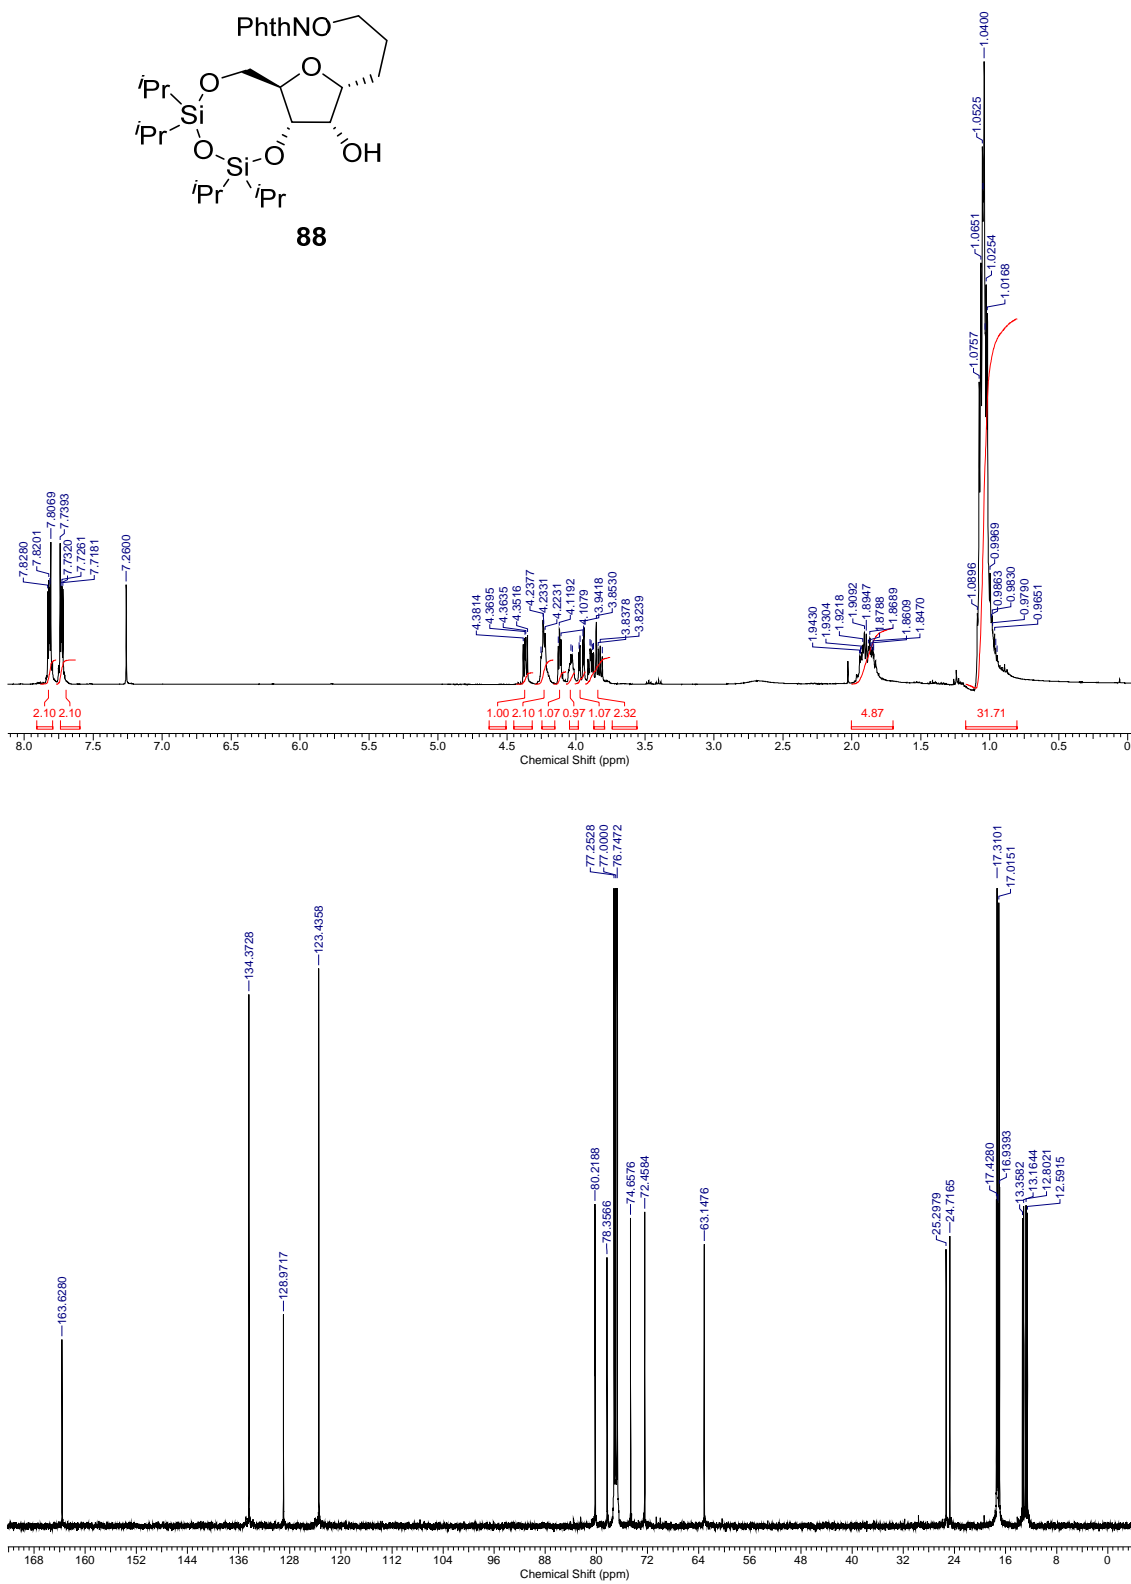

**Fig. S78.** <sup>1</sup>H NMR (400 MHz, CDCl<sub>3</sub>) and <sup>13</sup>C{<sup>1</sup>H} NMR (125.7 MHz, CDCl<sub>3</sub>) of compound **88**.

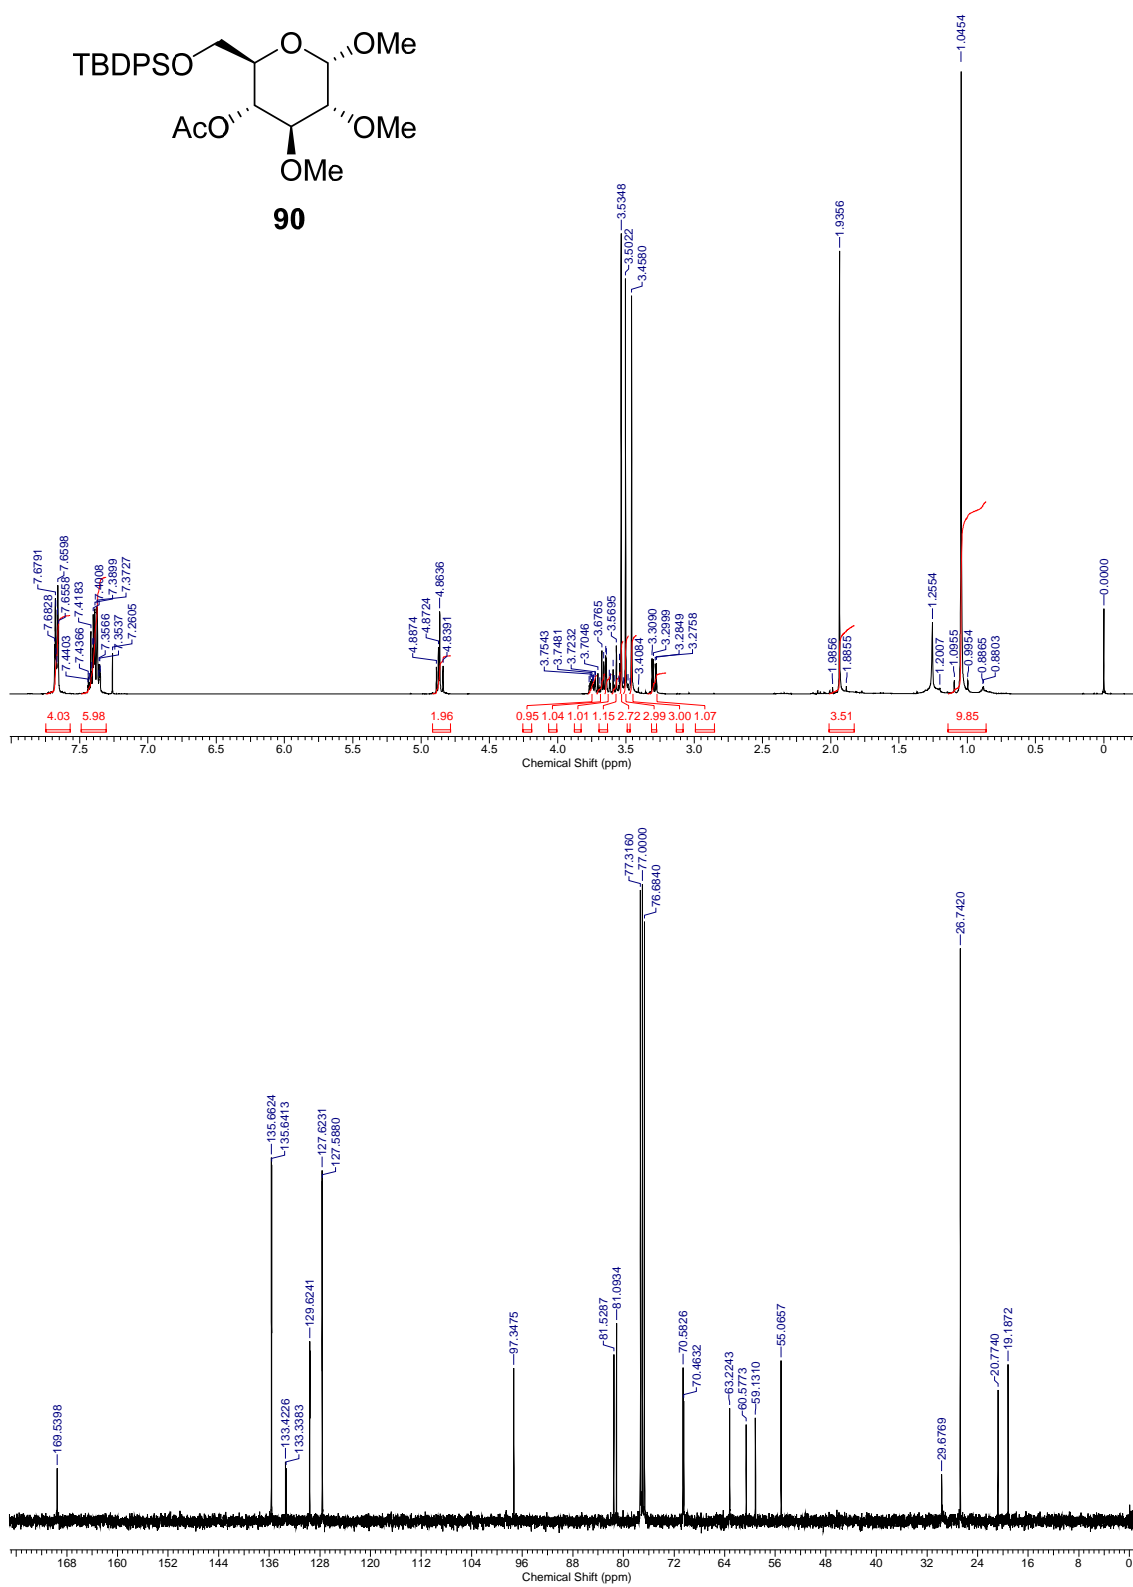

**Fig. S79.** <sup>1</sup>H NMR (400 MHz, CDCl<sub>3</sub>) and <sup>13</sup>C{<sup>1</sup>H} NMR (100.6 MHz, CDCl<sub>3</sub>) of compound **90**.

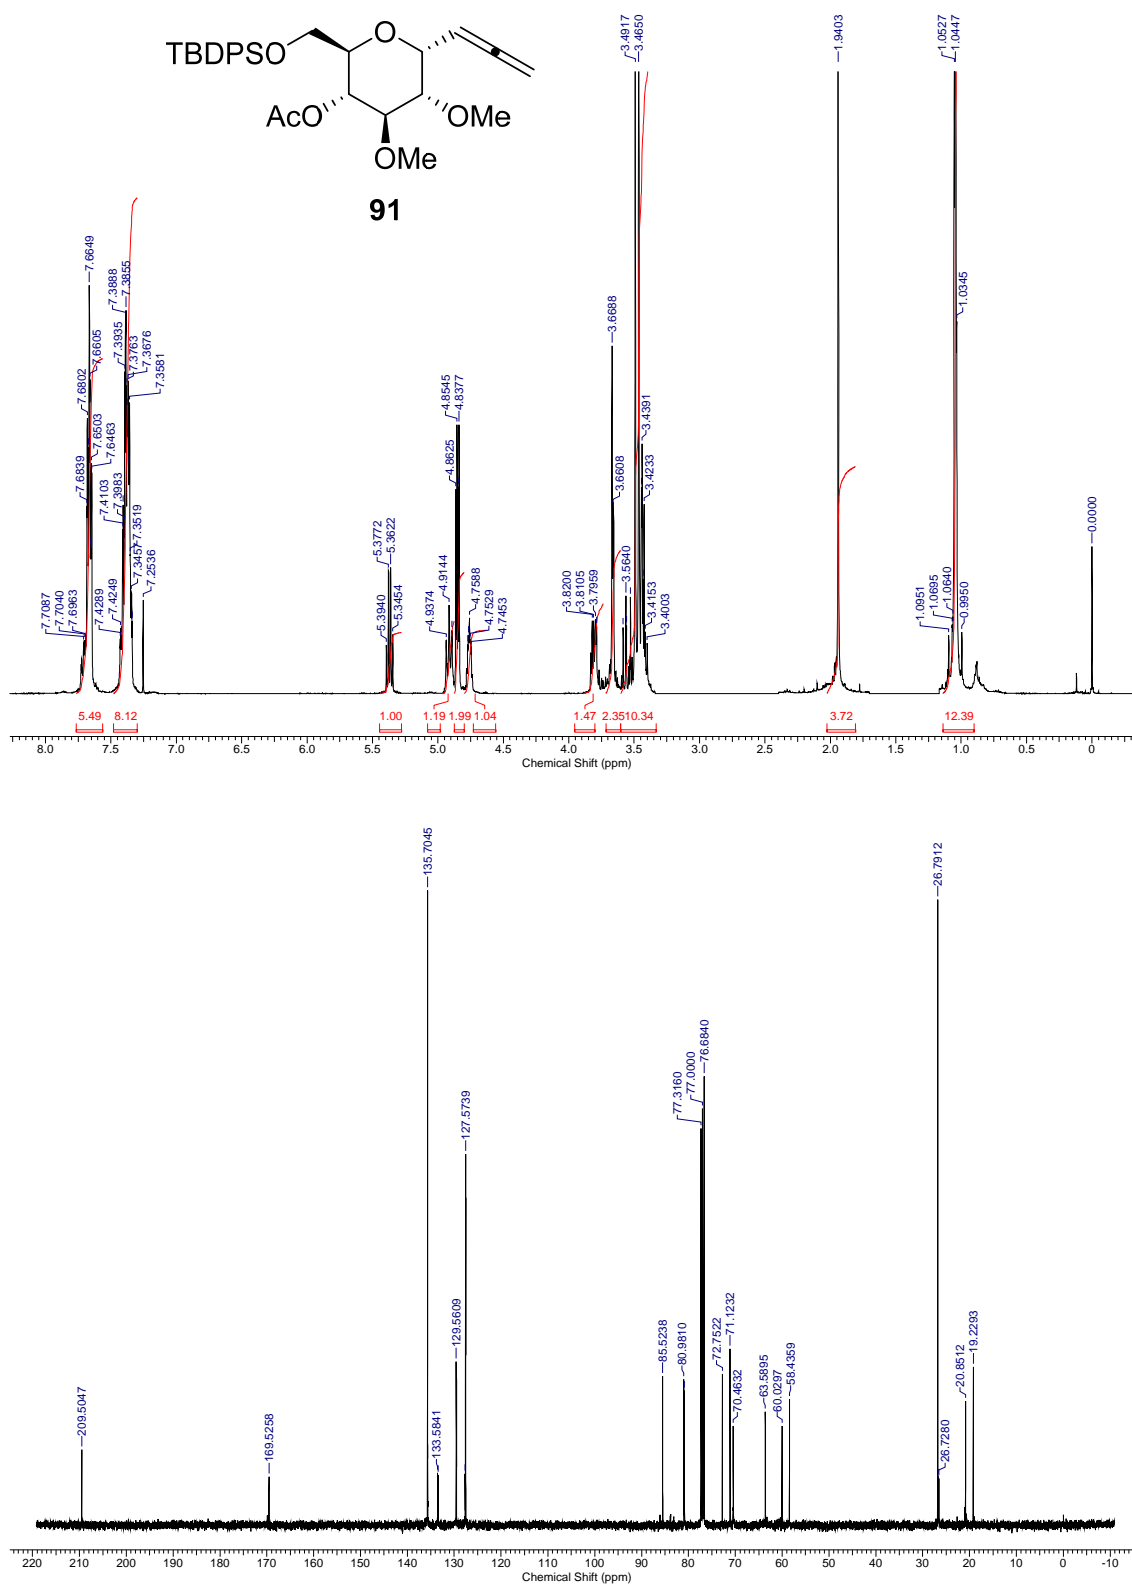

**Fig. S80.**  $^1\text{H}$  NMR (400 MHz,  $\text{CDCl}_3$ ) and  $^{13}\text{C}\{^1\text{H}\}$  NMR (100.6 MHz,  $\text{CDCl}_3$ ) of compound **91**.

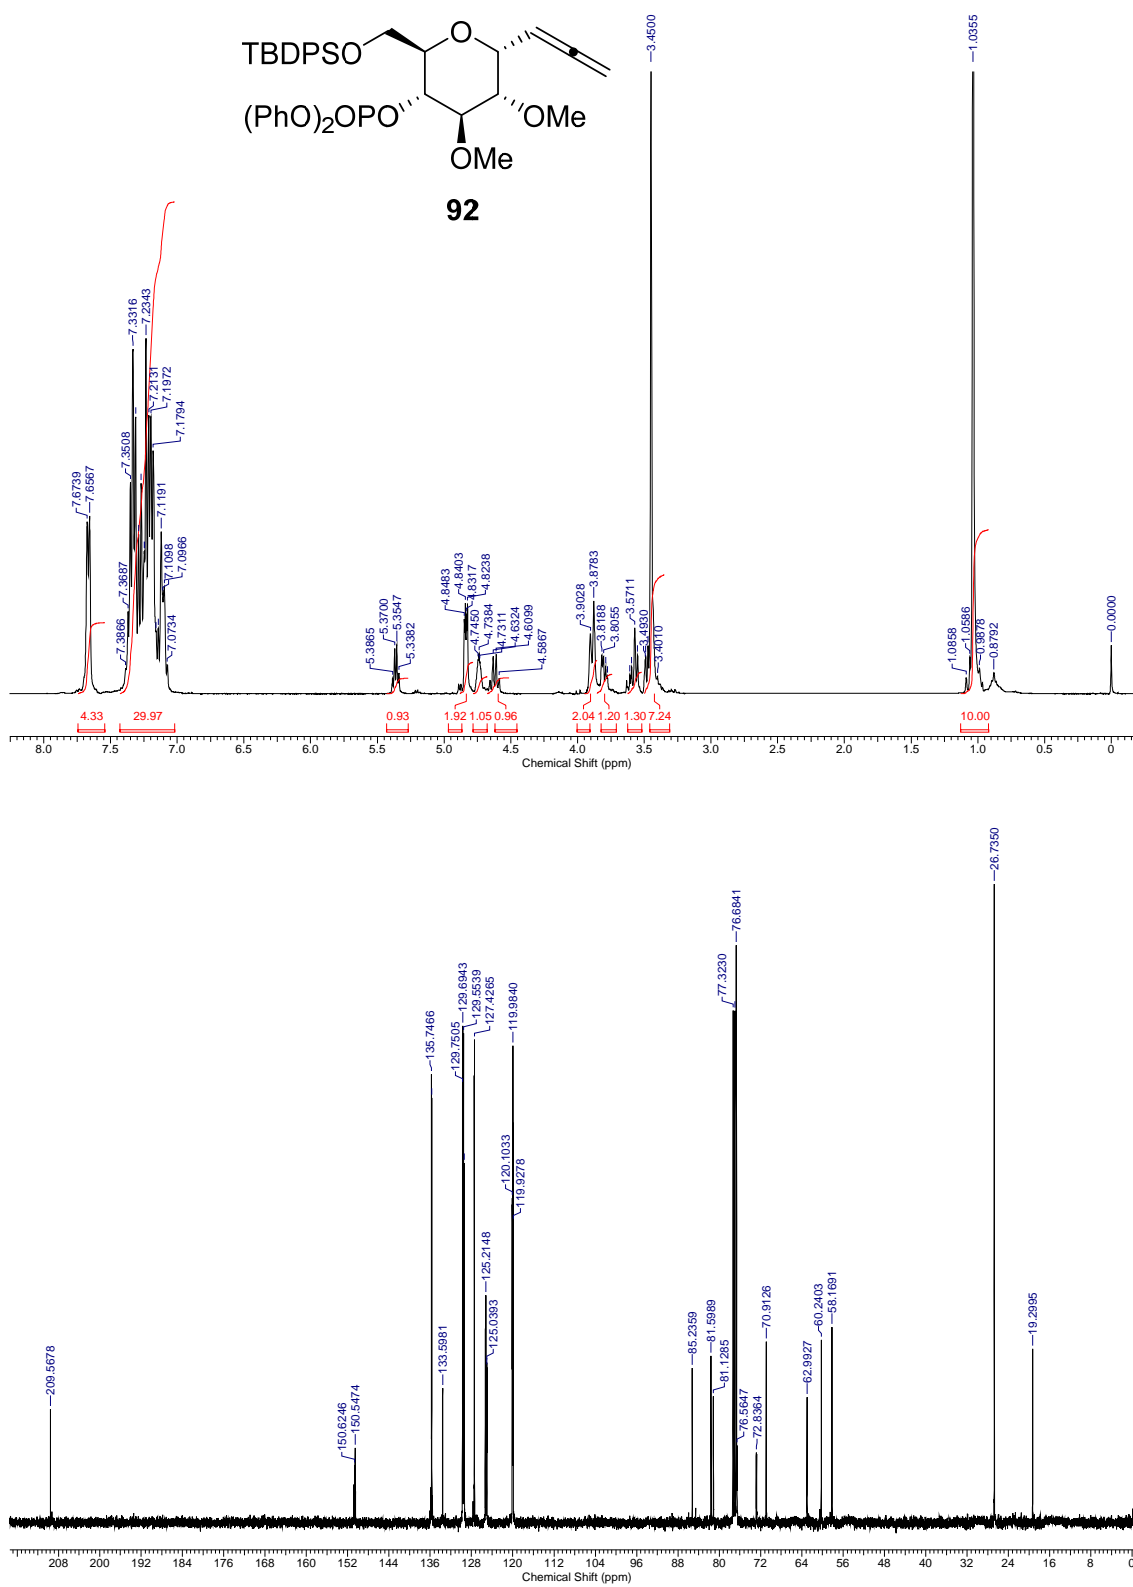

**Fig. S81.** <sup>1</sup>H NMR (500 MHz, CDCl<sub>3</sub>) and <sup>13</sup>C{<sup>1</sup>H} NMR (100.6 MHz, CDCl<sub>3</sub>) of compound **92**.

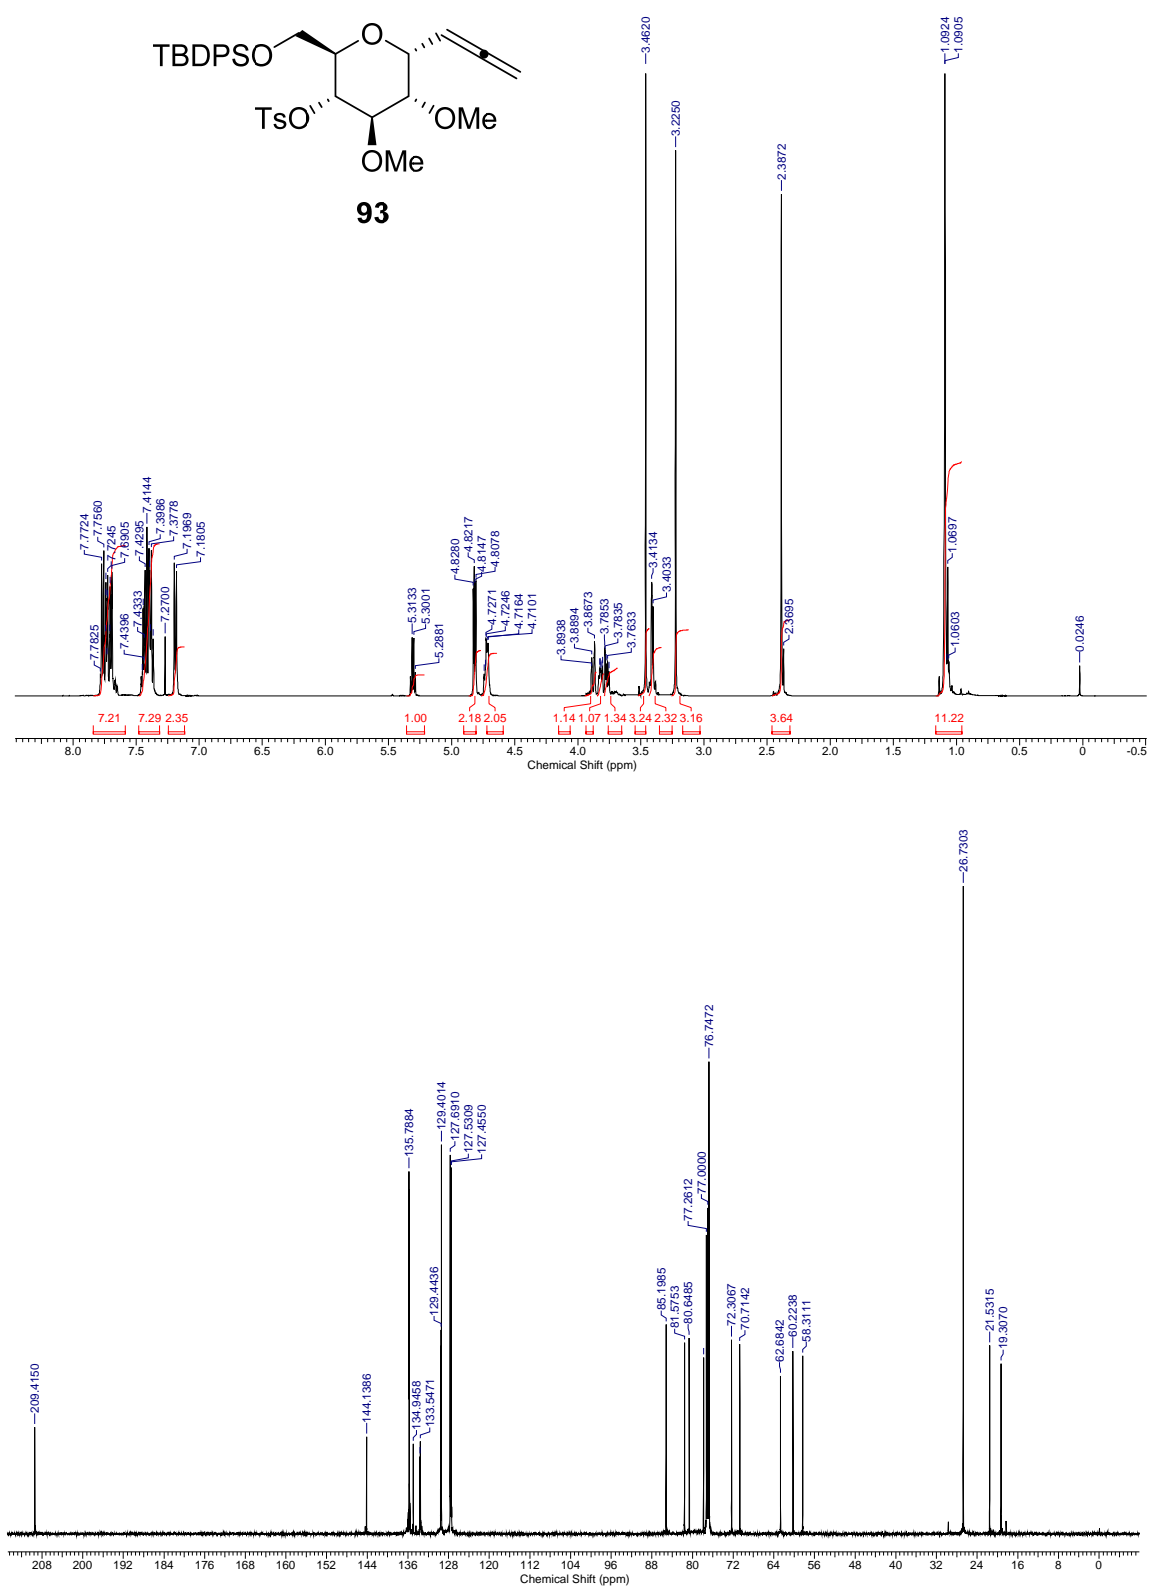

**Fig. S82.** <sup>1</sup>H NMR (500 MHz, CDCl<sub>3</sub>) and <sup>13</sup>C{<sup>1</sup>H} NMR (125.7 MHz, CDCl<sub>3</sub>) of compound **93**.



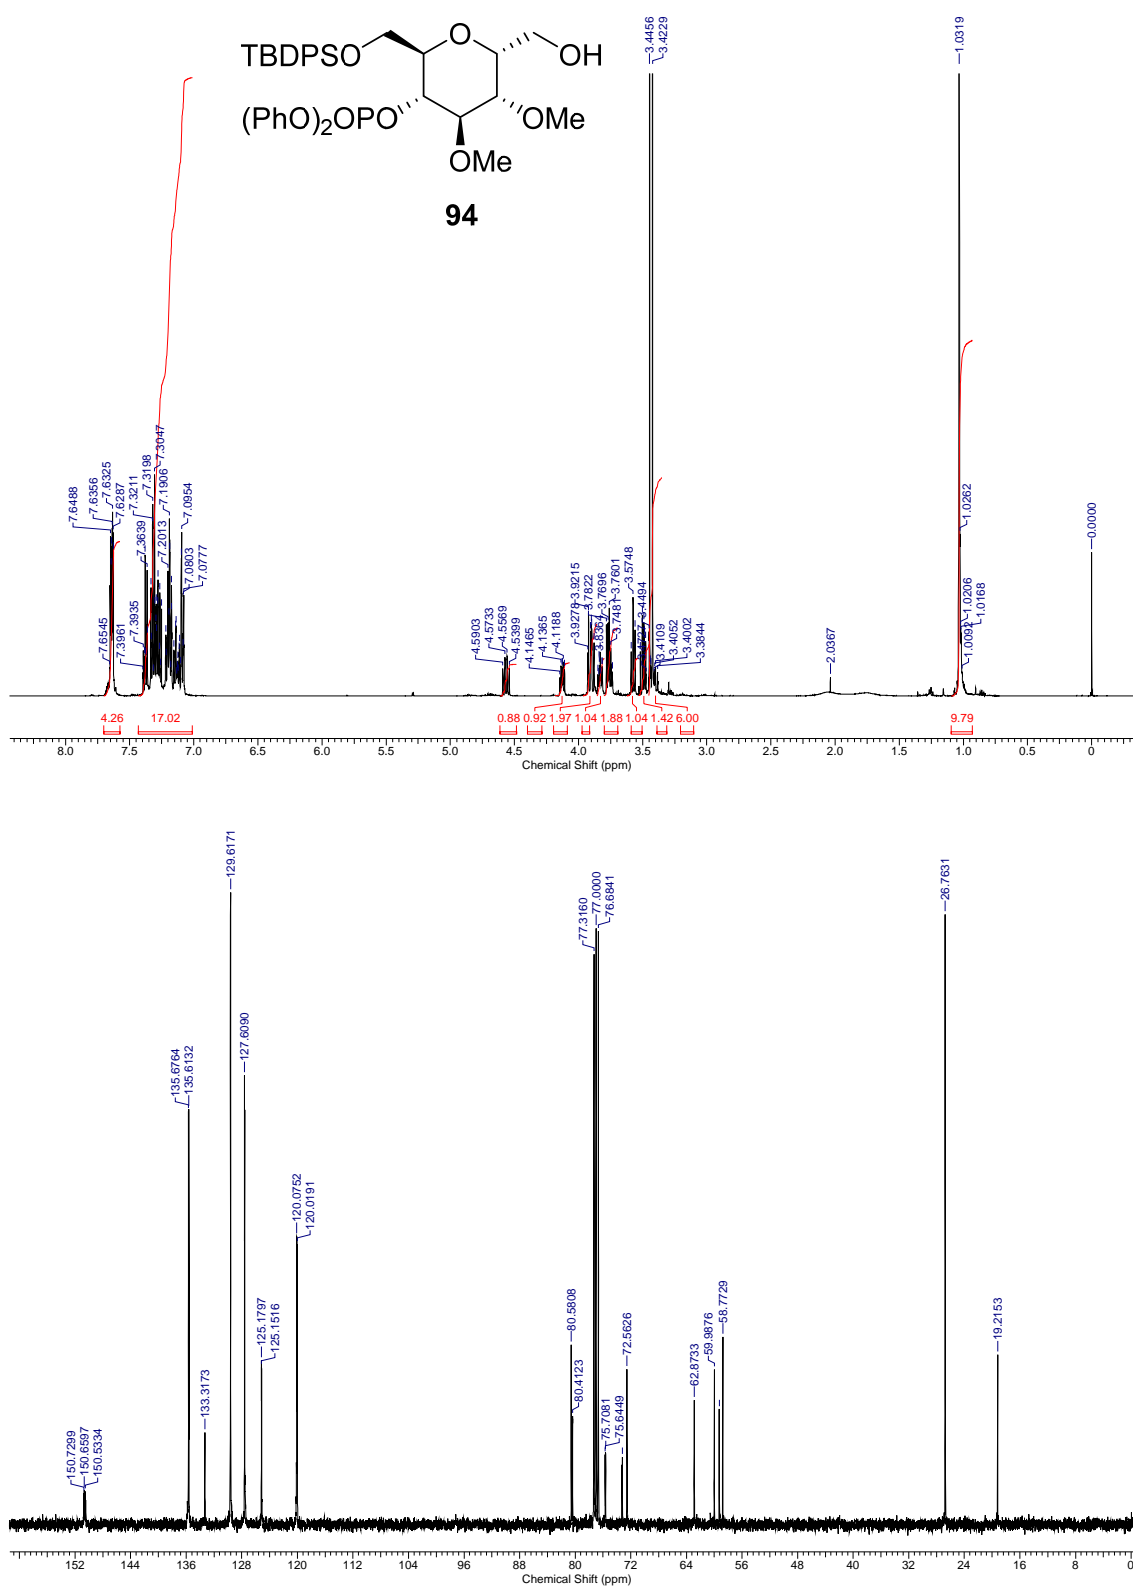

**Fig. S83.** <sup>1</sup>H NMR (500 MHz, CDCl<sub>3</sub>) and <sup>13</sup>C{H} NMR (100.6 MHz, CDCl<sub>3</sub>) of compound **94**.

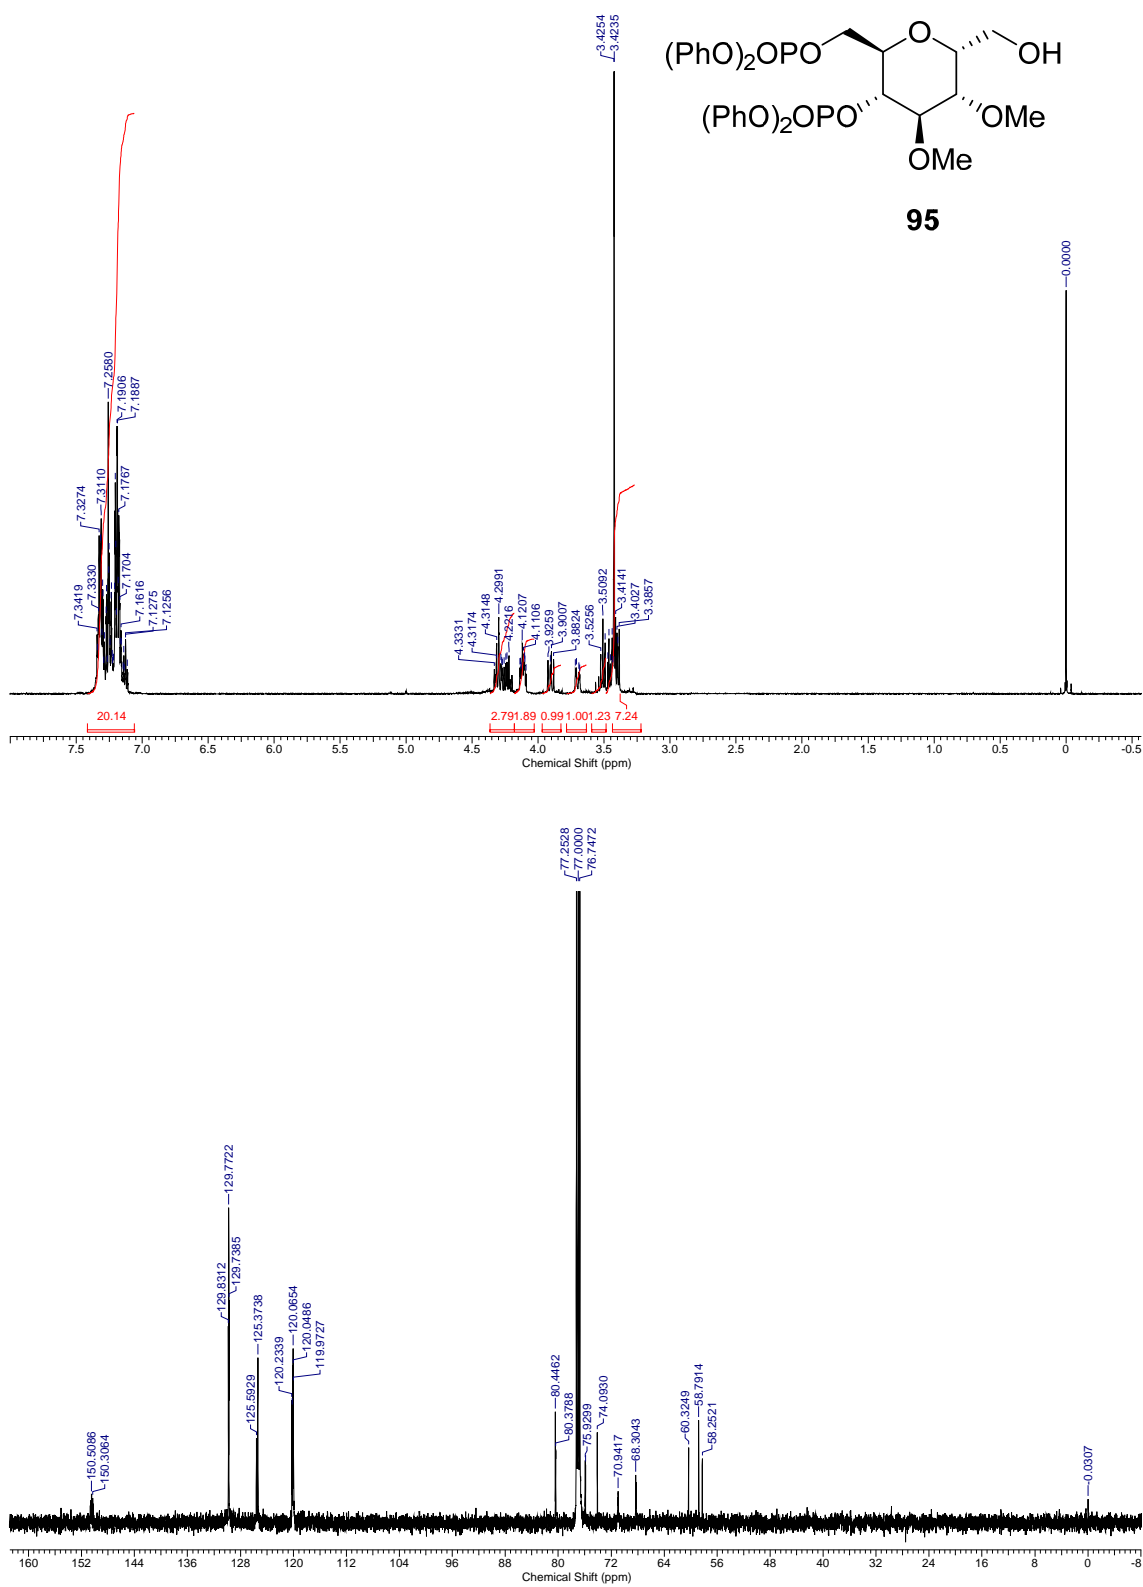

**Fig. S84.** <sup>1</sup>H NMR (500 MHz, CDCl<sub>3</sub>) and <sup>13</sup>C{<sup>1</sup>H} NMR (125.7 MHz, CDCl<sub>3</sub>) of compound **95**.

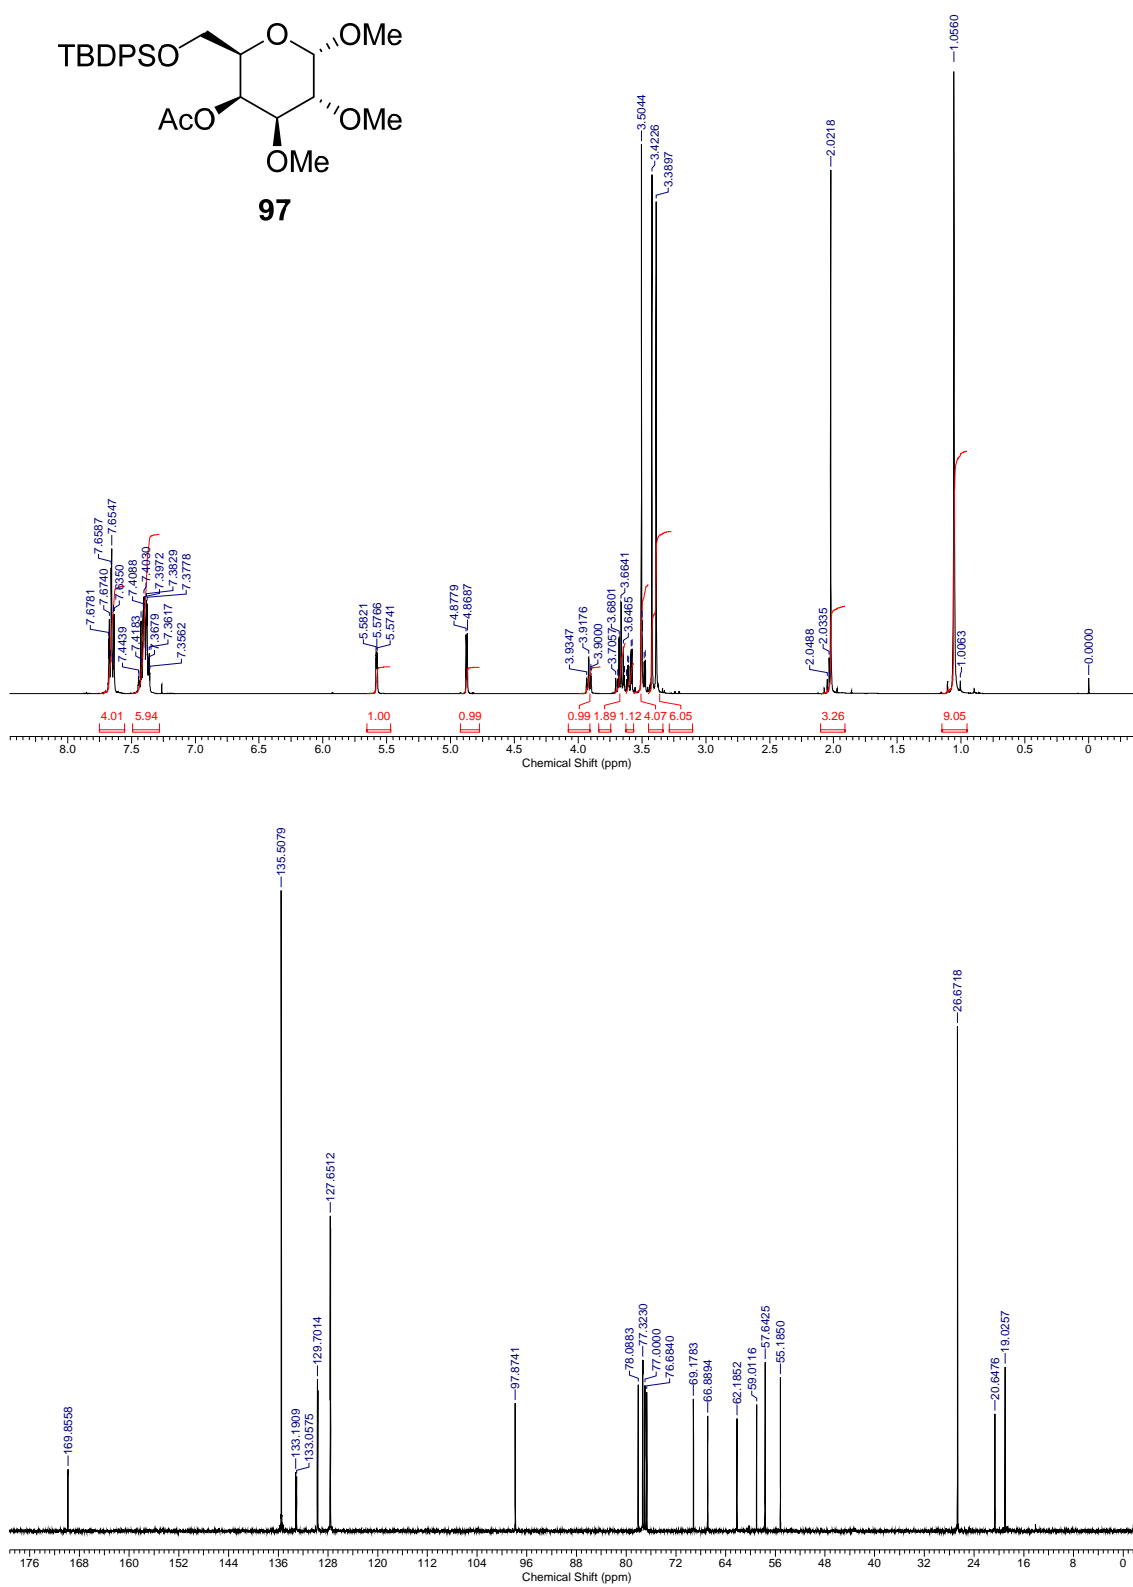

**Fig. S85.** <sup>1</sup>H NMR (400 MHz, CDCl<sub>3</sub>) and <sup>13</sup>C{<sup>1</sup>H} NMR (100.6 MHz, CDCl<sub>3</sub>) of compound **97**.

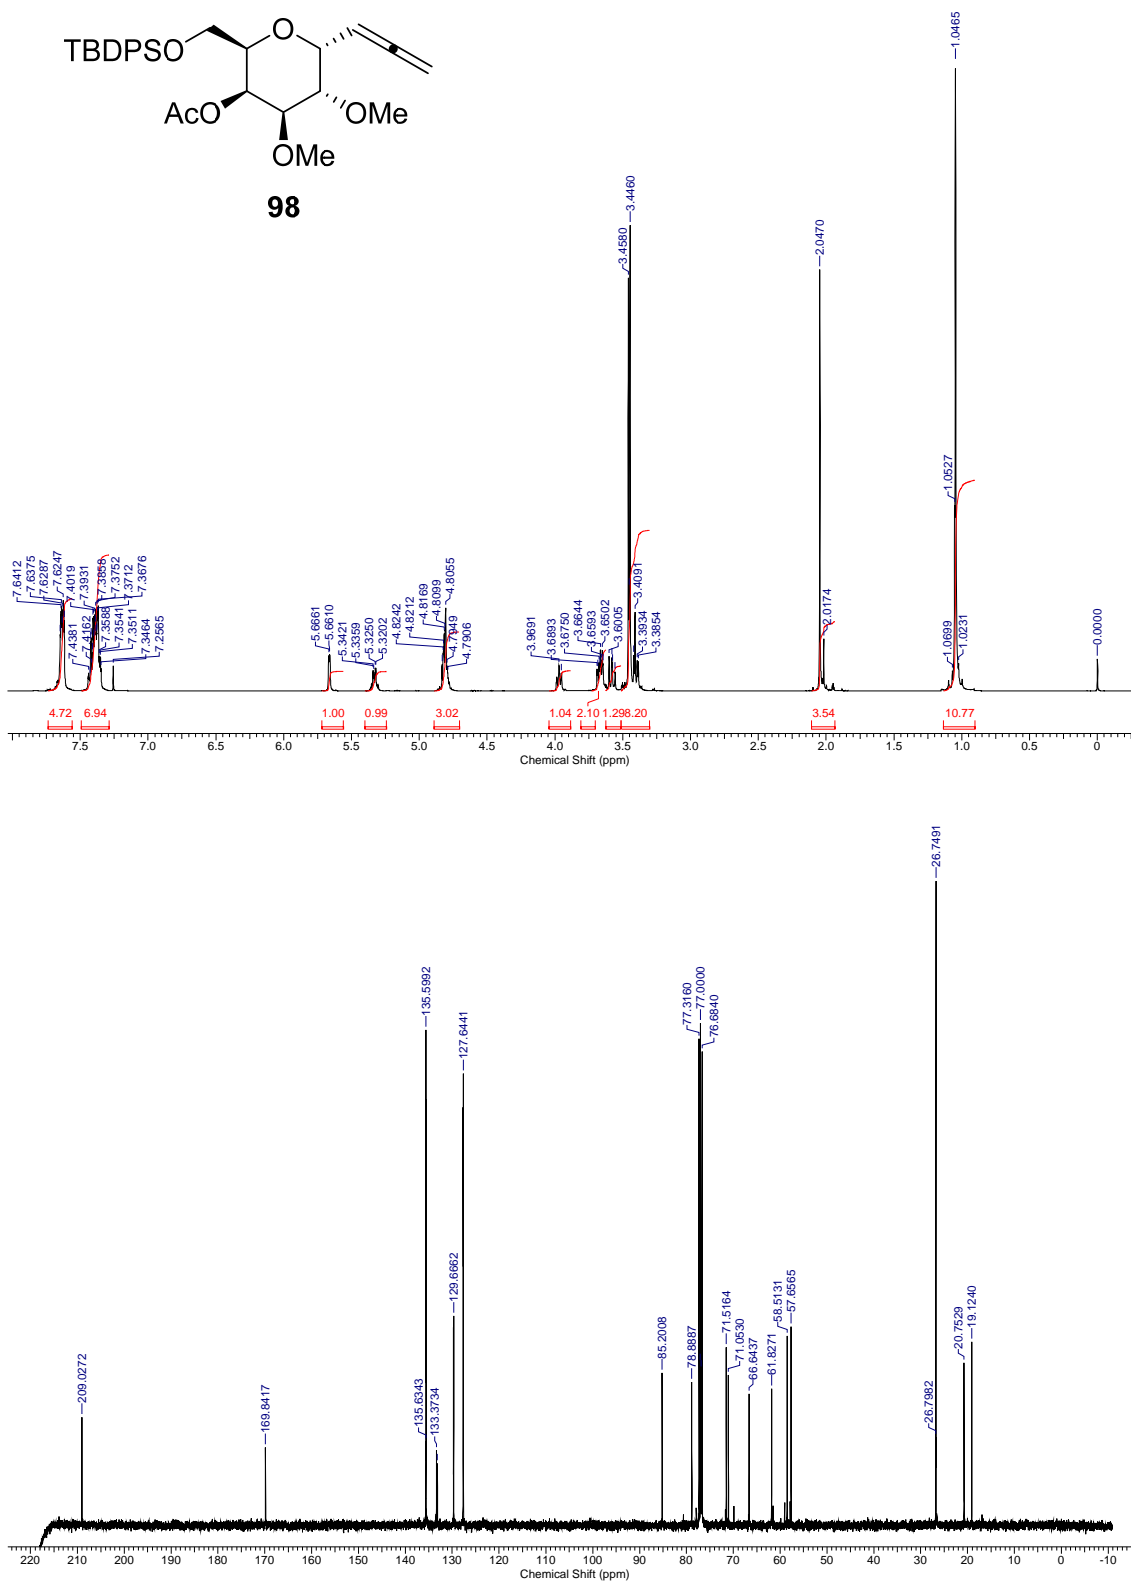

**Fig. S86.** <sup>1</sup>H NMR (400 MHz, CDCl<sub>3</sub>) and <sup>13</sup>C{<sup>1</sup>H} NMR (100.6 MHz, CDCl<sub>3</sub>) of compound **98**.

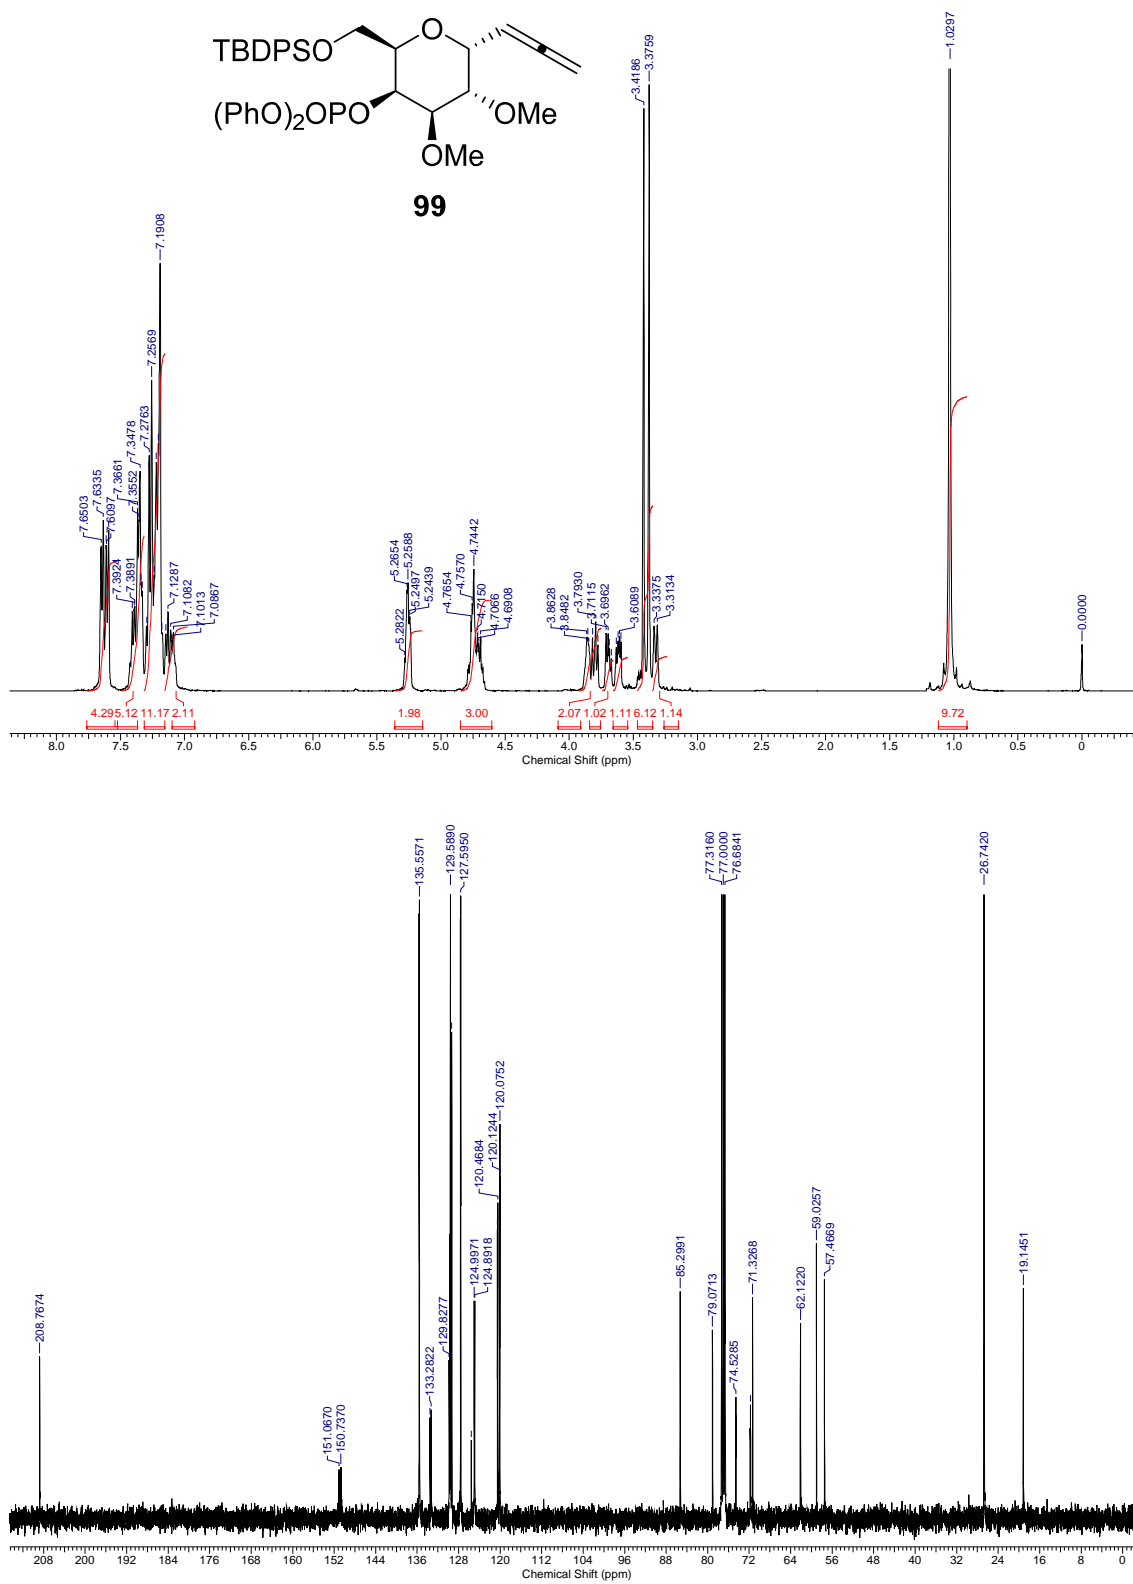

**Fig. S87.** <sup>1</sup>H NMR (400 MHz, CDCl<sub>3</sub>) and <sup>13</sup>C{<sup>1</sup>H} NMR (100.6 MHz, CDCl<sub>3</sub>) of compound **99**.

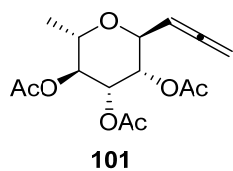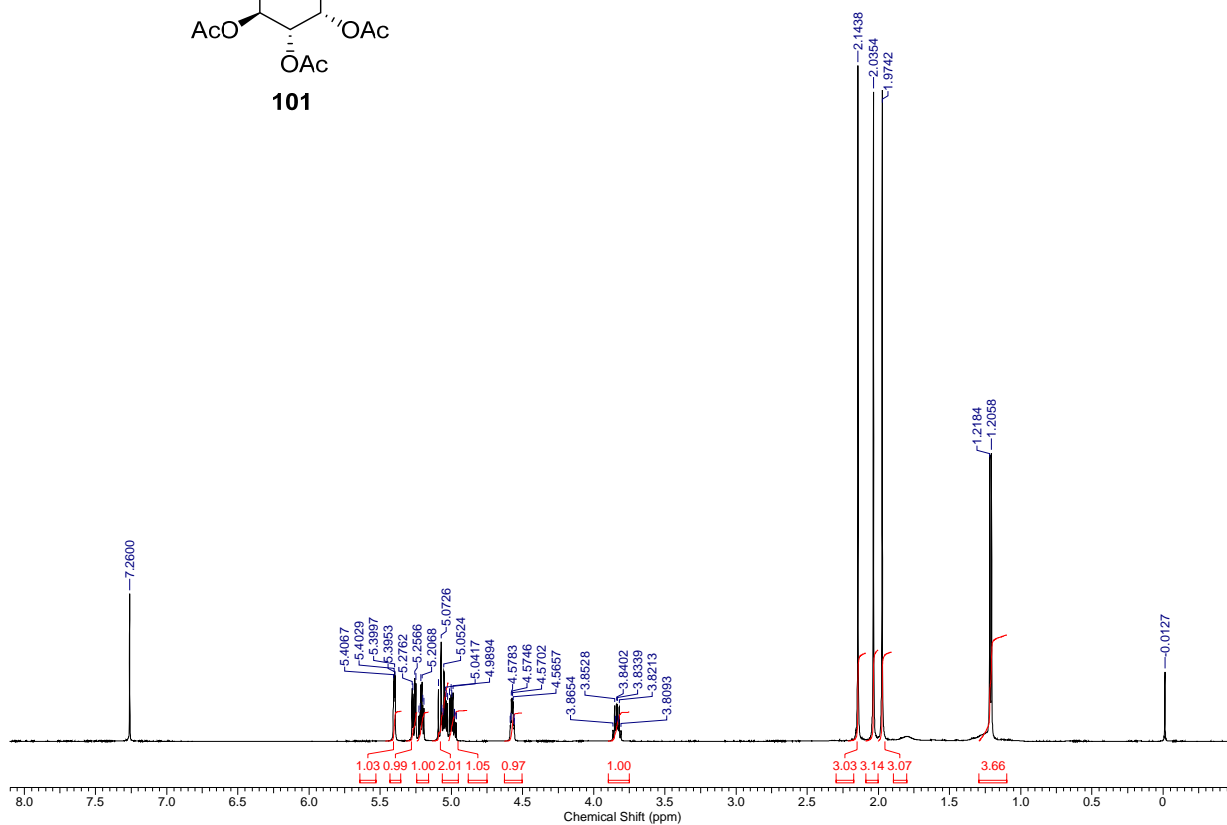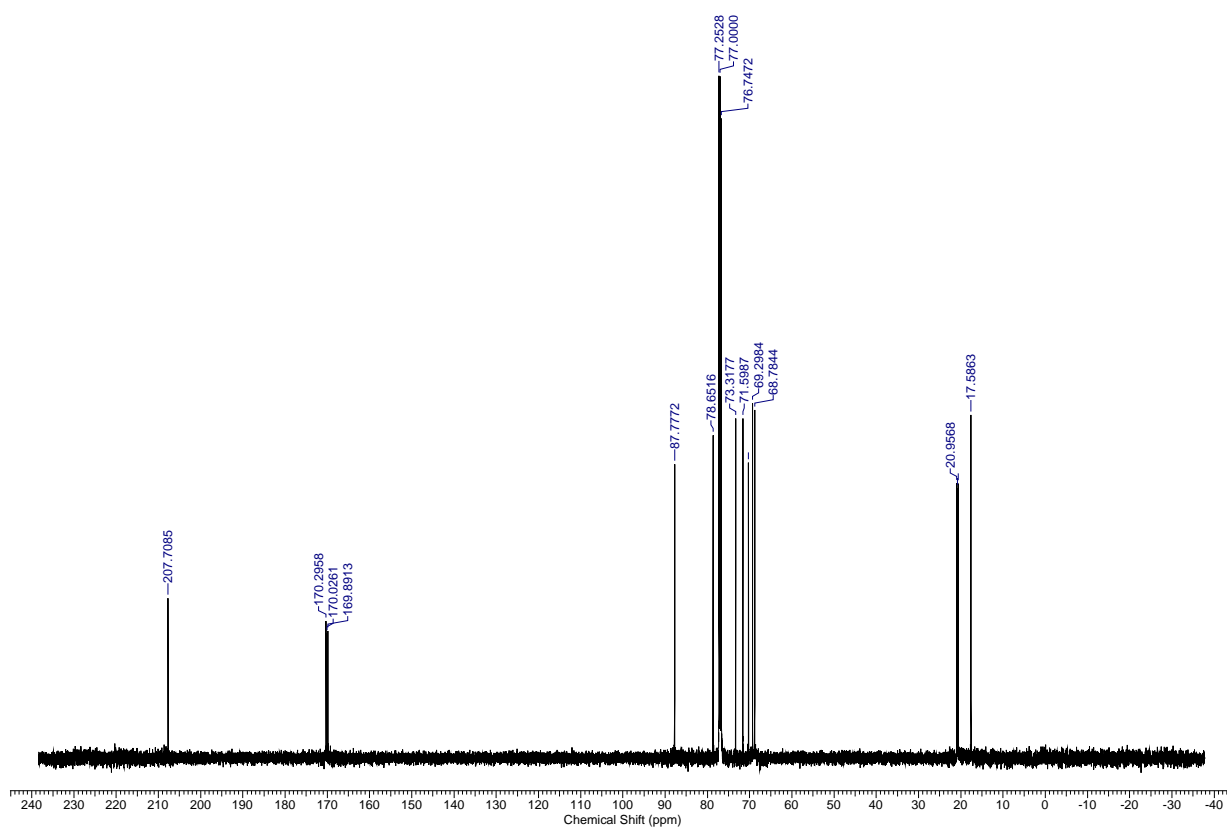

**Fig. S88.** <sup>1</sup>H NMR (500 MHz, CDCl<sub>3</sub>) and <sup>13</sup>C{<sup>1</sup>H} NMR (125.7 MHz, CDCl<sub>3</sub>) of compound **101**.

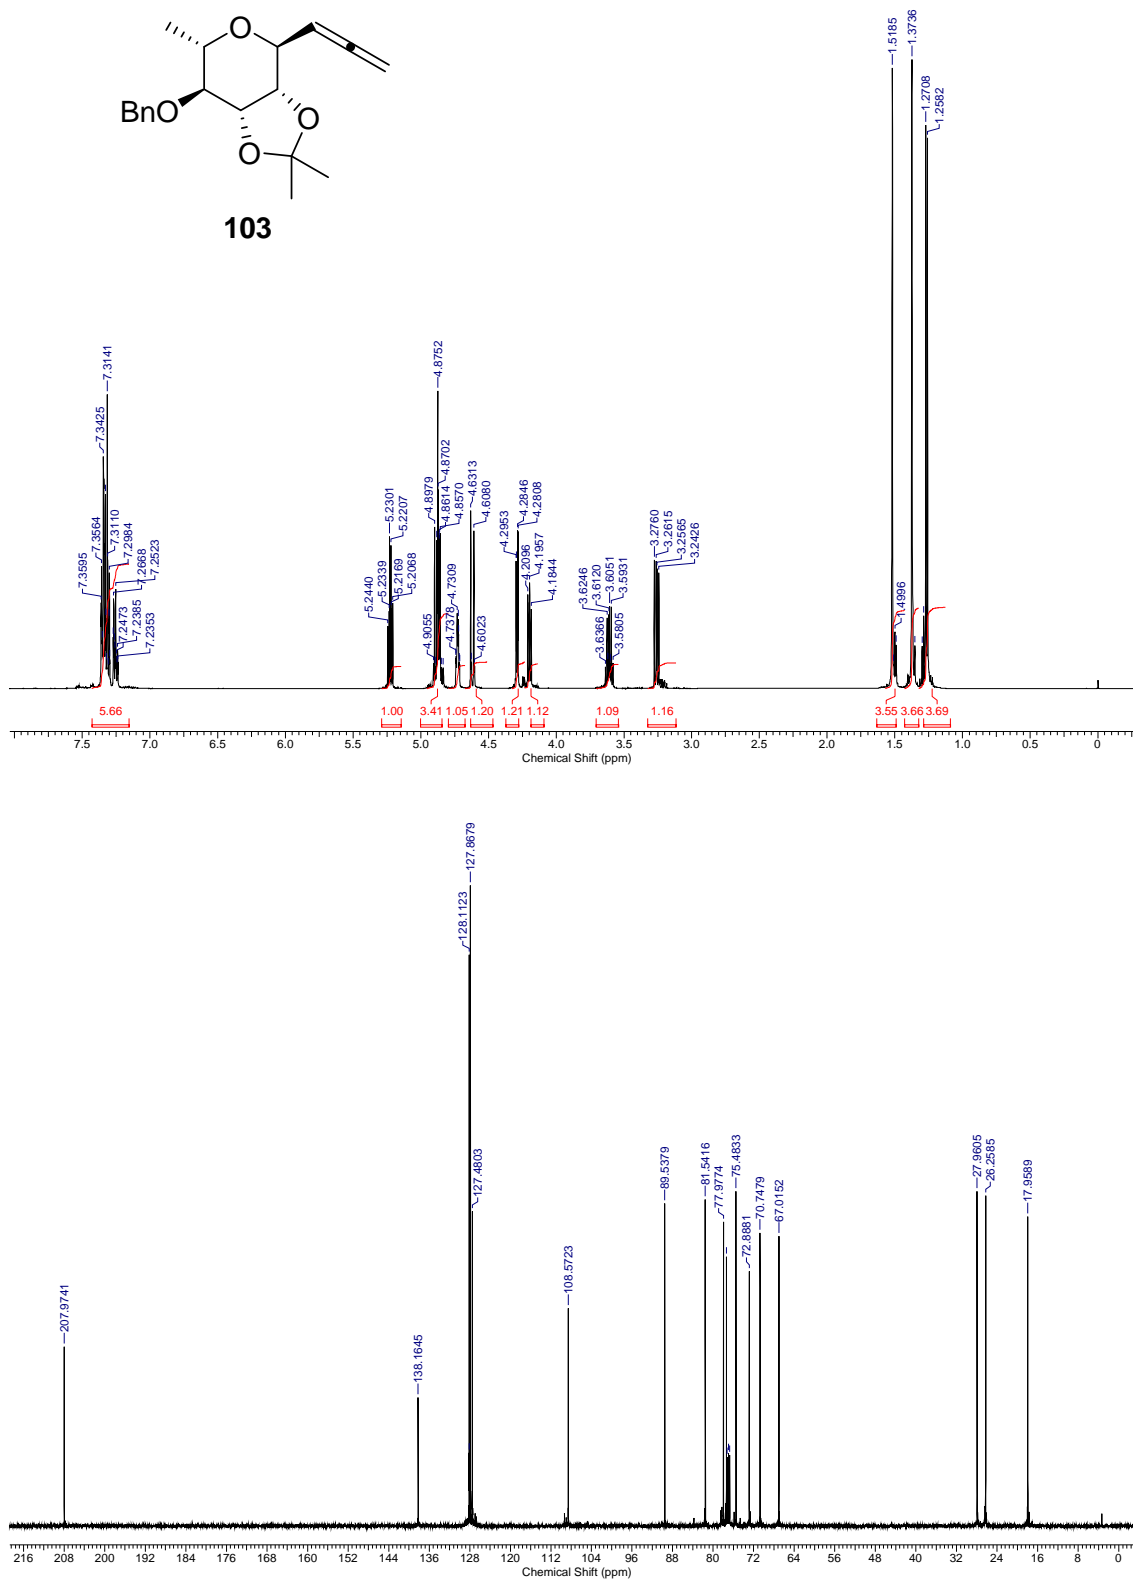

**Fig. S89.** <sup>1</sup>H NMR (500 MHz, CDCl<sub>3</sub>) and <sup>13</sup>C{<sup>1</sup>H} NMR (125.7 MHz, CDCl<sub>3</sub>) of compound **103**.

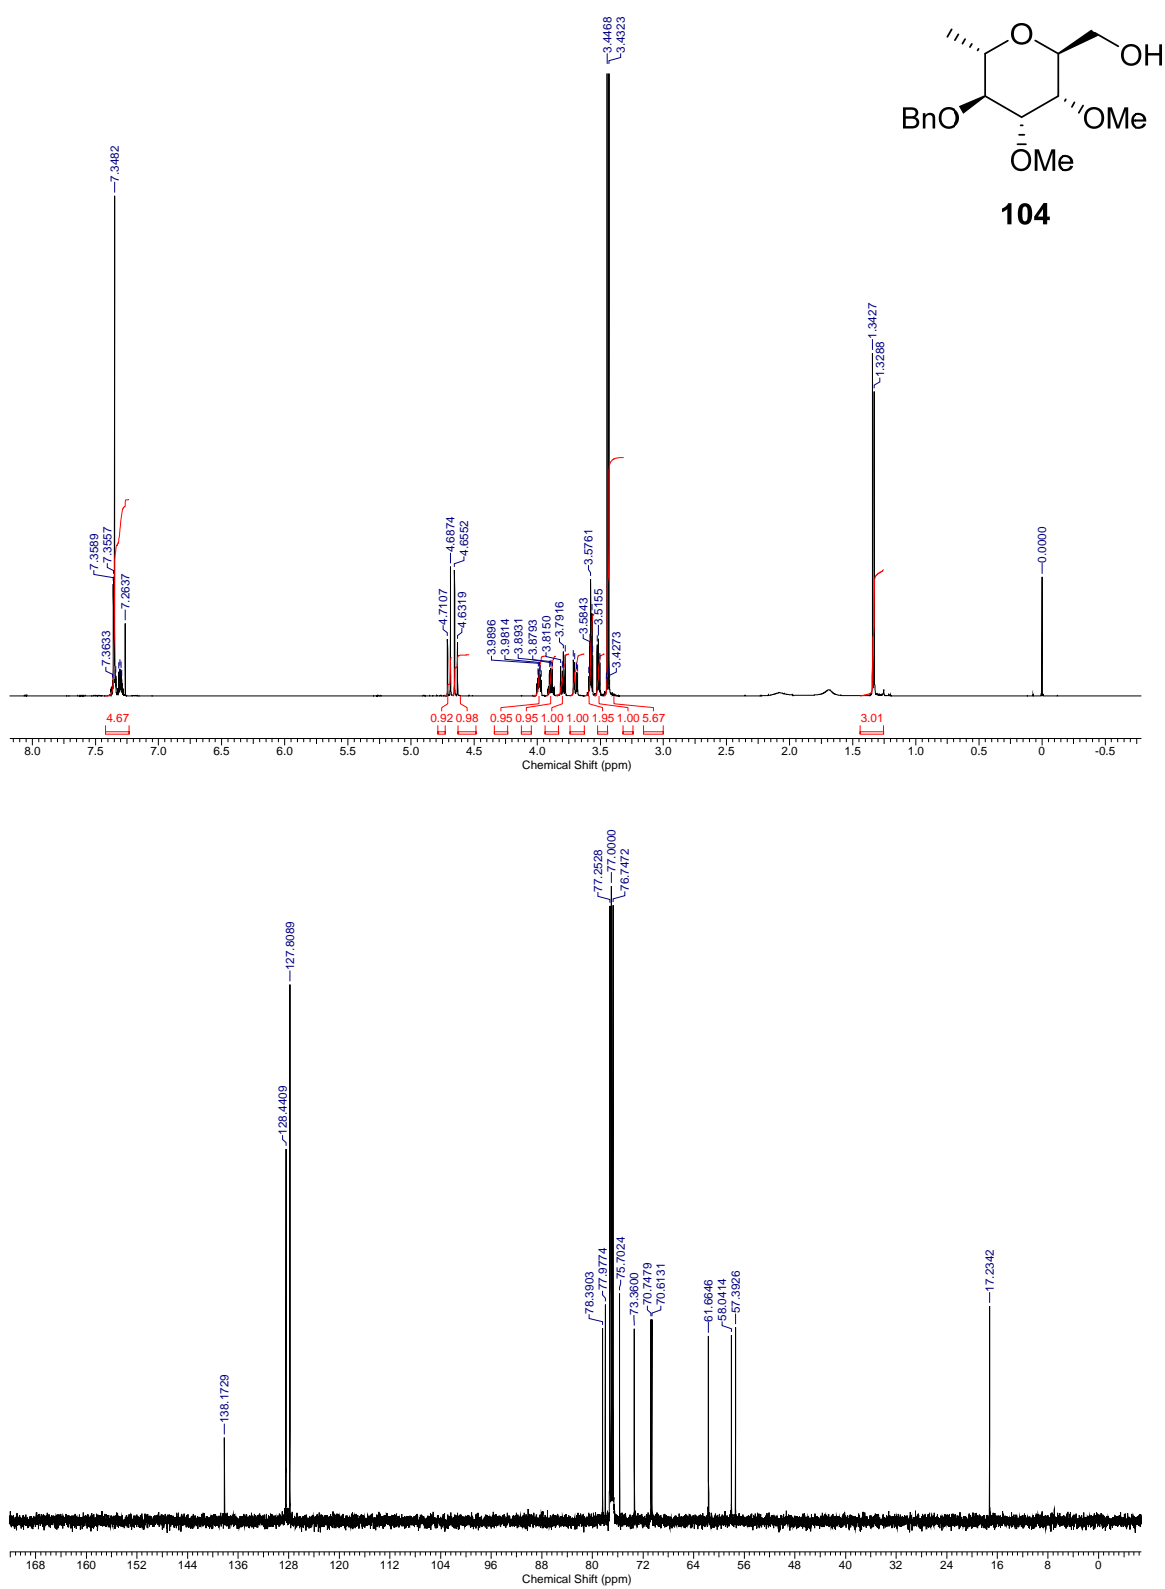

**Fig. S90.** <sup>1</sup>H NMR (500 MHz, CDCl<sub>3</sub>) and <sup>13</sup>C{<sup>1</sup>H} NMR (125.7 MHz, CDCl<sub>3</sub>) of compound **104**.



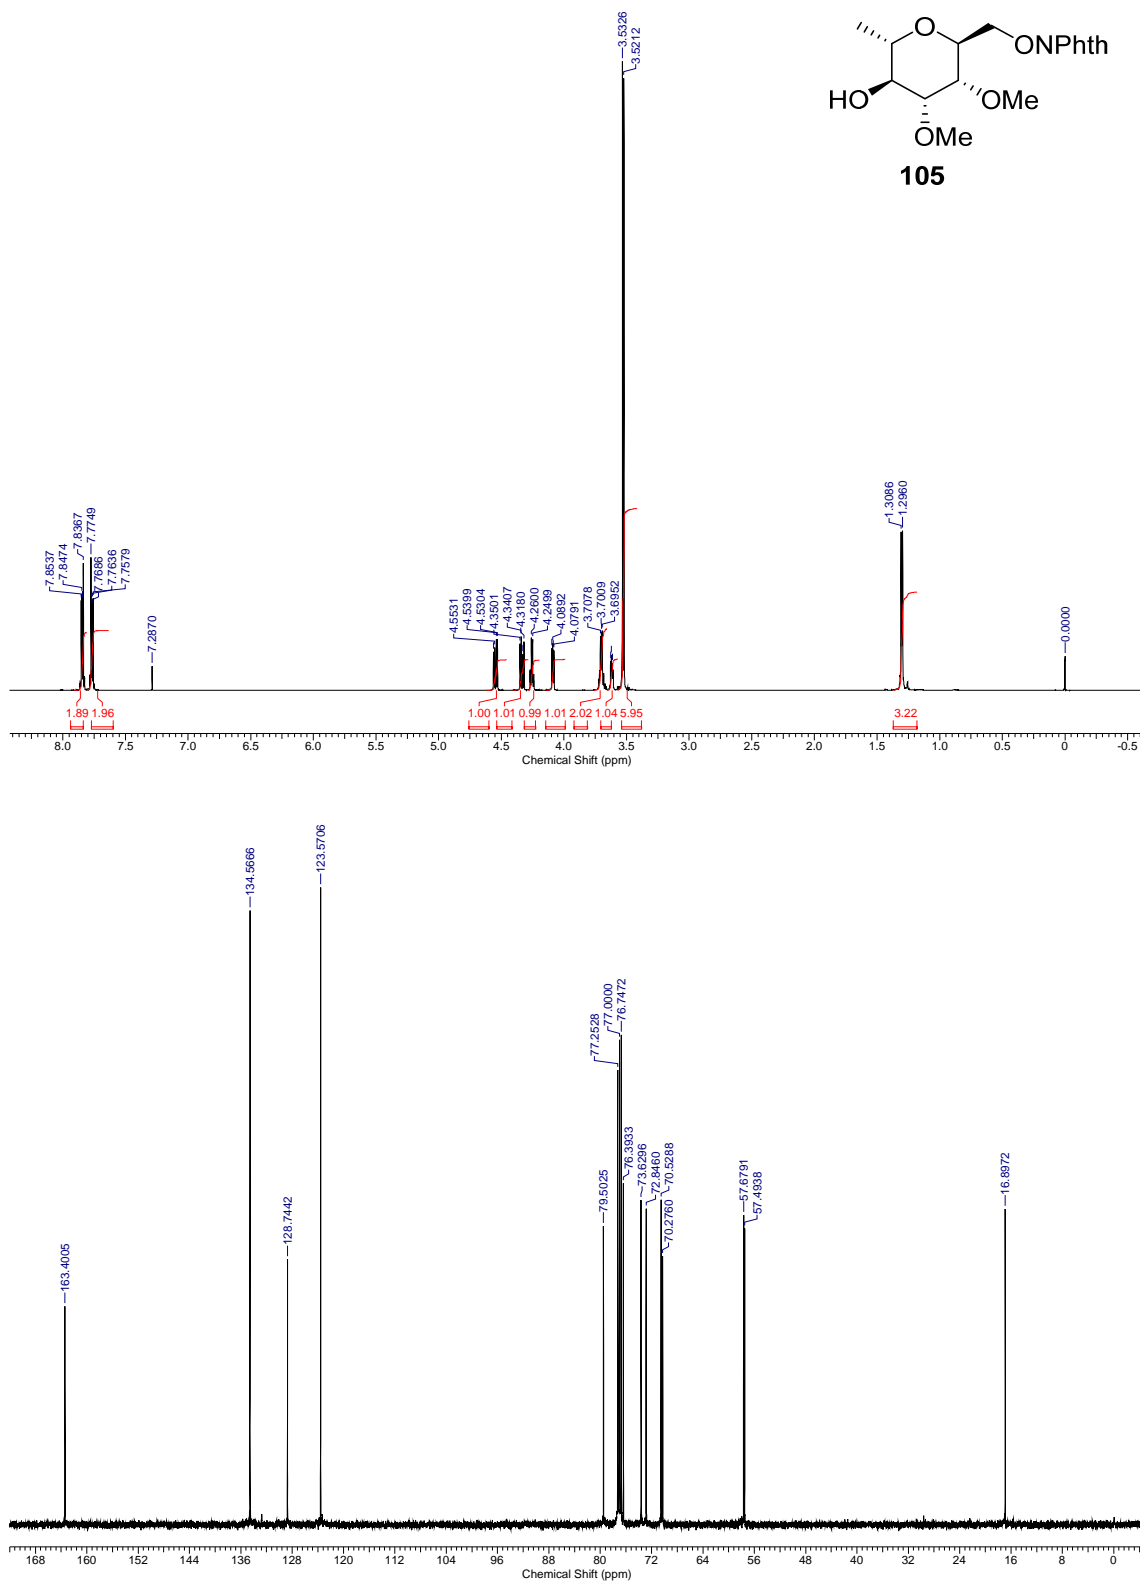

**Fig. S91.**  $^1\text{H}$  NMR (500 MHz,  $\text{CDCl}_3$ ) and  $^{13}\text{C}\{^1\text{H}\}$  NMR (125.7 MHz,  $\text{CDCl}_3$ ) of compound **105**.

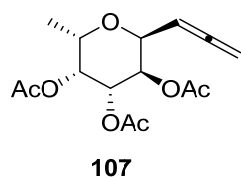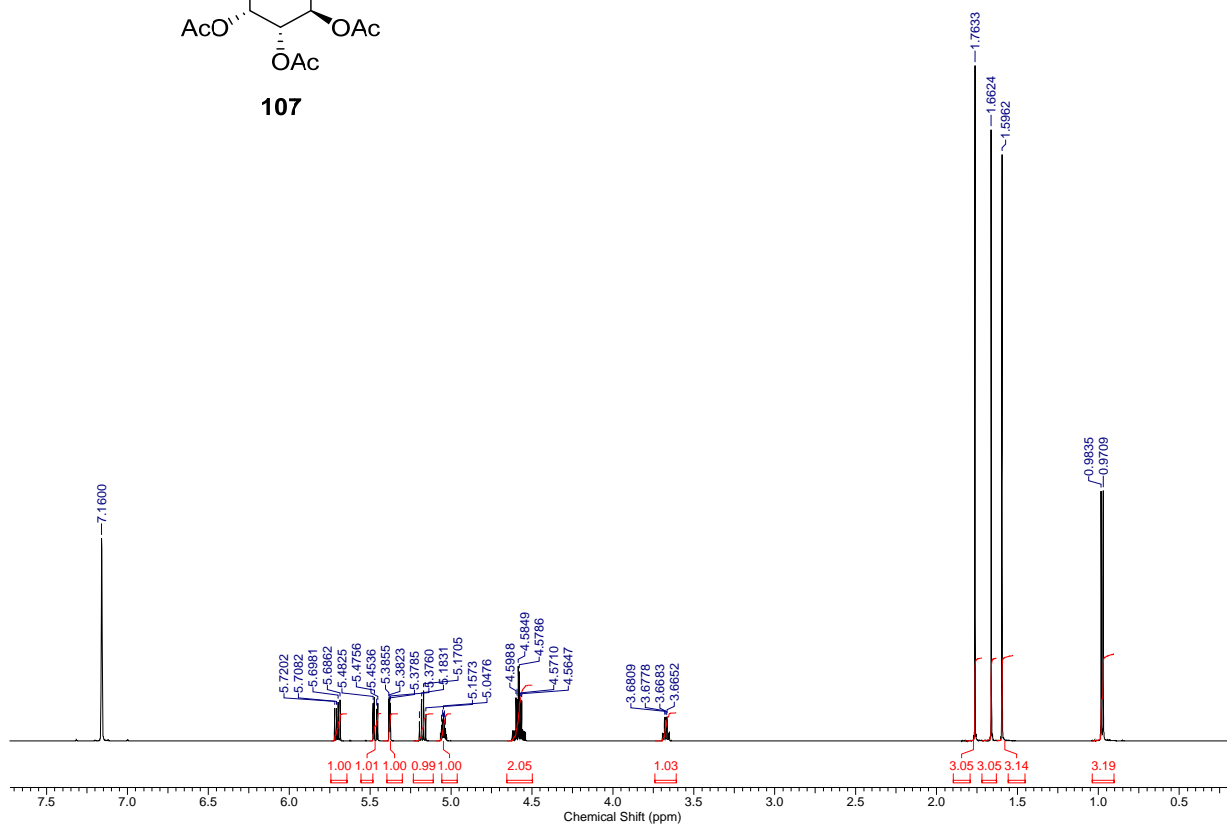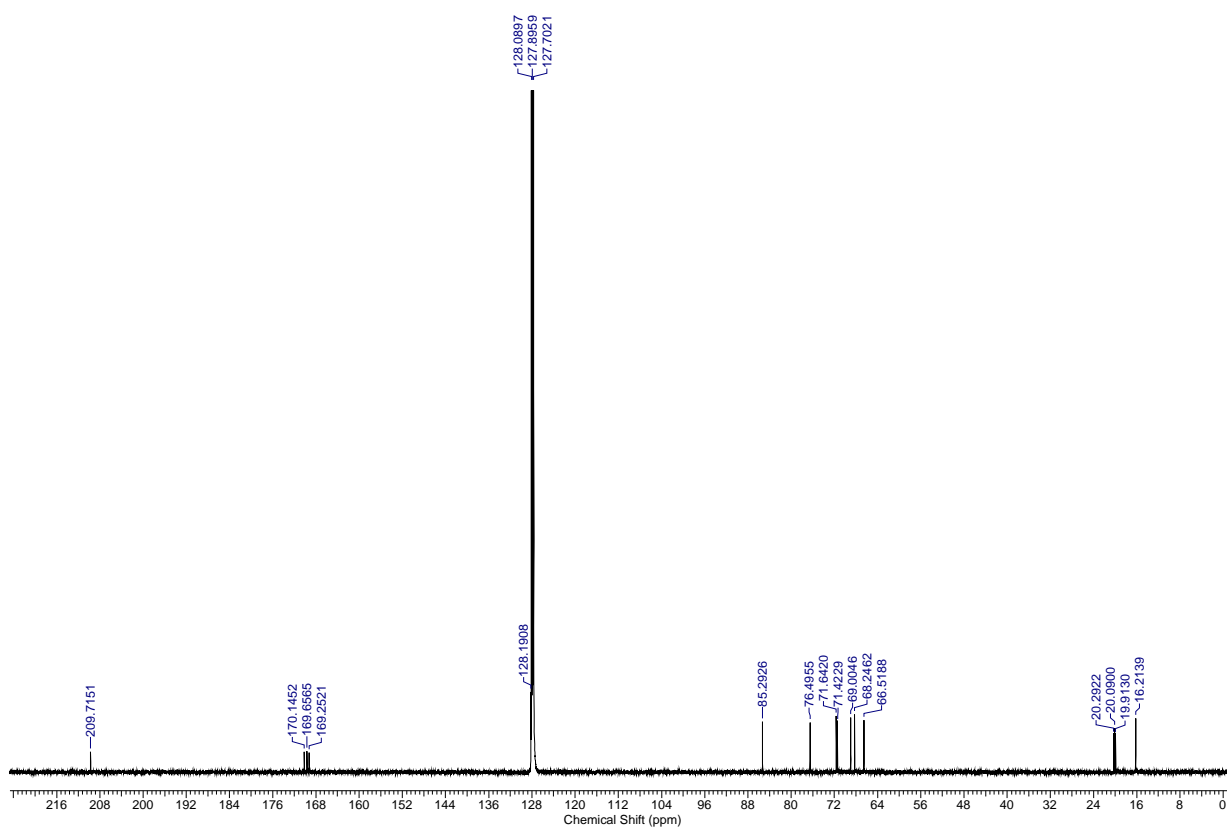

**Fig. S92.** <sup>1</sup>H NMR (500 MHz, C<sub>6</sub>D<sub>6</sub>) and <sup>13</sup>C{H} NMR (125.7 MHz, C<sub>6</sub>D<sub>6</sub>) of compound **107**.

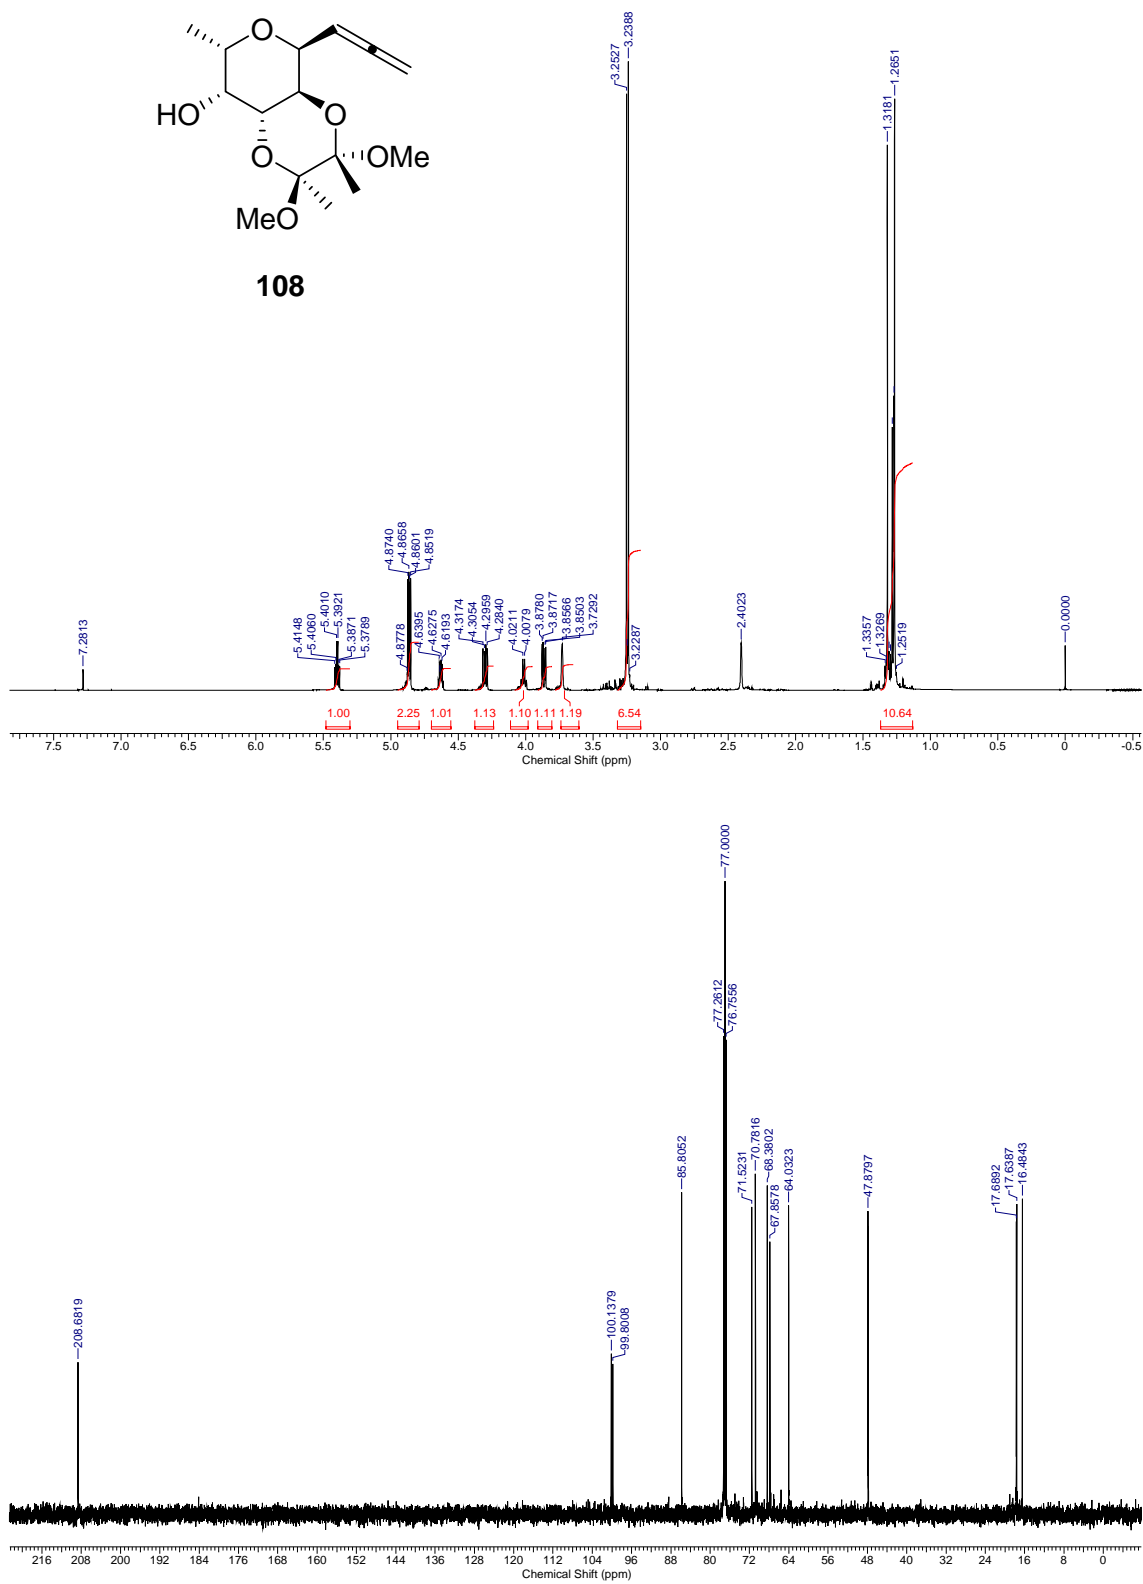

**Fig. S93.** <sup>1</sup>H NMR (500 MHz, CDCl<sub>3</sub>) and <sup>13</sup>C{<sup>1</sup>H} NMR (125.7 MHz, CDCl<sub>3</sub>) of compound **108**.

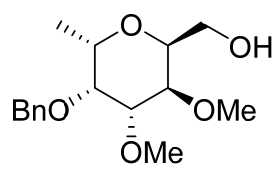

**109**

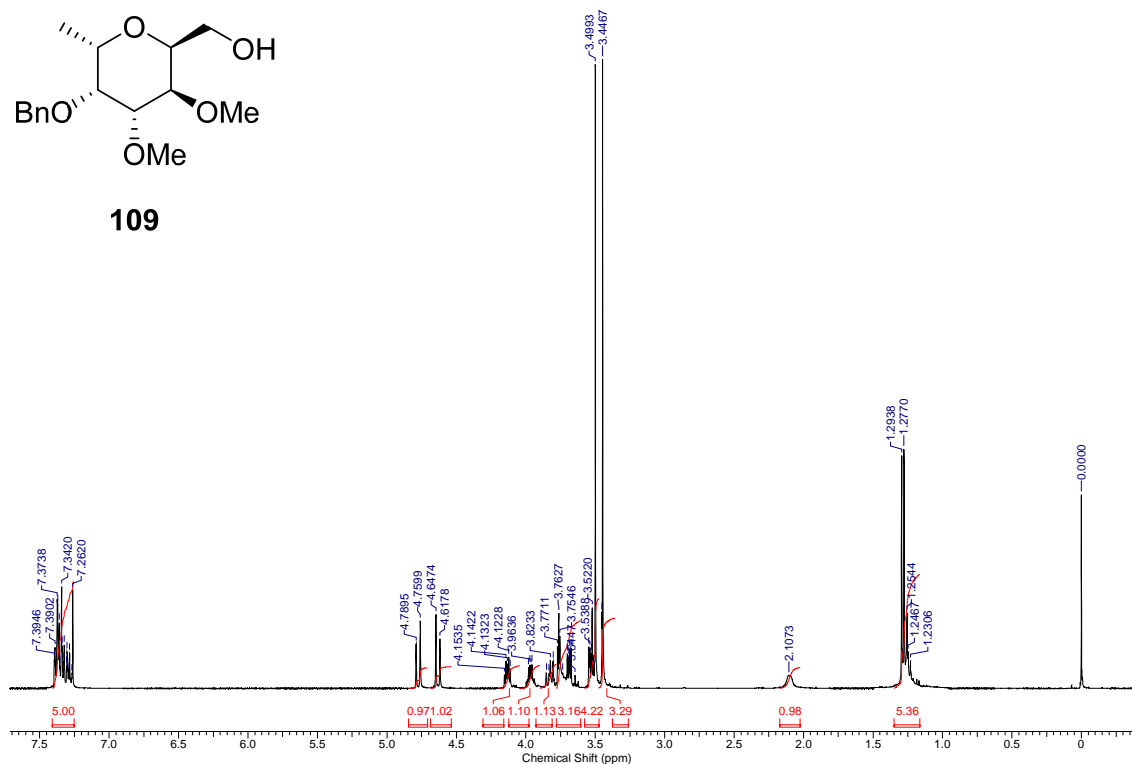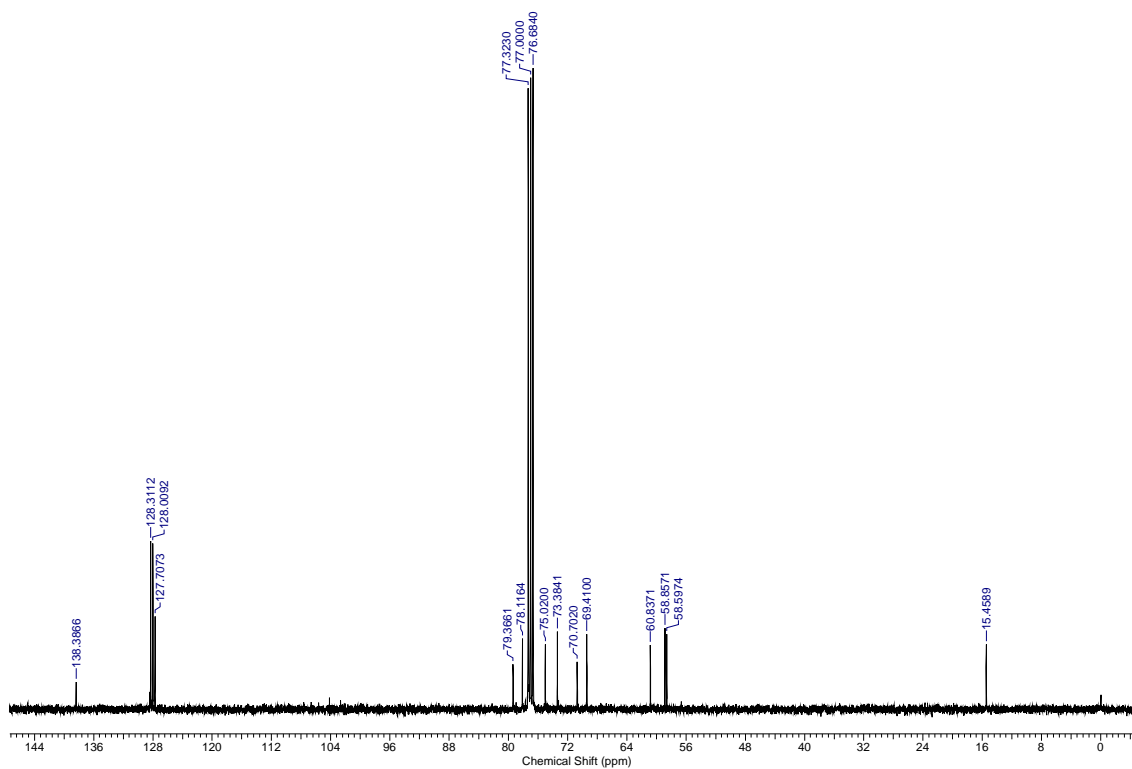

**Fig. S94.**  $^1\text{H}$  NMR (400 MHz,  $\text{CDCl}_3$ ) and  $^{13}\text{C}\{^1\text{H}\}$  NMR (100.6 MHz,  $\text{CDCl}_3$ ) of compound **109**.
